# Supplementary material for: LINE-1 protein localization and functional dynamics during the cell cycle
Source: eLife. 2018 Jan 8;7:e30058. doi: 10.7554/eLife.30058 (PMC5821460; doi:10.7554/eLife.30058)
Supplement: Figure 9—source data 1. — All the proteins and the corresponding peptides identified by mass spectrometry analysis after sequential ORF2p-V5 or ORF2p-IgG IP are reported. The score (sum of scores of the individual peptides), coverage, number of peptides (# peptides) and number of peptide spectra matches (# PSM) are reported for each protein. Two replicates of ORF2p-IgG IPs (orange and blue columns for experiment 1 and 2 respectively) and two replicates of ORF2p-V5 IPs (yellow and green columns for experiment 1 and 2 respectively) are reported. [file elife-30058-fig9-data1.xlsx]

## Sheet: Combined Proteins w.o. Peptides
Accession	Description	Score IgG IP-1	Coverage IgG IP-1	# Peptides IgG IP-1	# PSM IgG IP-1	Score IgG IP-2	Coverage IgG IP-2	# Peptides IgG IP-2	# PSM IgG IP-2	Score IP V5-1	Coverage IP V5-1	# Peptides IP V5-1	# PSM IP V5-1	Score IP V5-2	Coverage IP V5-2	# Peptides IP V5-2	# PSM IP V5-2	# AAs	MW [kDa]	calc. pI
P35579	Myosin-9 OS=Homo sapiens GN=MYH9 PE=1 SV=4 - [MYH9_HUMAN]	1630.13	65.05	164	672	4771.82	64.18	158	1416	1969.7	69.34	177	865	4067.32	70.56	185	1298	1960	226.392	5.60498
Q53G99	Beta actin variant (Fragment) OS=Homo sapiens PE=2 SV=1 - [Q53G99_HUMAN]	1613.52	74.13	27	572	2488.19	81.33	34	644	1991.92	78.4	34	742	2315.65	85.6	36	642	375	41.7378	5.59229
B4DW52	cDNA FLJ55253, highly similar to Actin, cytoplasmic 1 OS=Homo sapiens PE=2 SV=1 - [B4DW52_HUMAN]	1442.77	69.74	23	508	2394.14	86.74	32	613	1718.76	74.35	30	642	1829.43	86.74	34	497	347	38.6082	5.35107
P68133	Actin, alpha skeletal muscle OS=Homo sapiens GN=ACTA1 PE=1 SV=1 - [ACTS_HUMAN]	794.125	41.91	17	339	1373.61	49.6	23	423	1171.82	46.42	21	517	1534.29	47.21	24	489	377	42.0239	5.38916
P35580	Myosin-10 OS=Homo sapiens GN=MYH10 PE=1 SV=3 - [MYH10_HUMAN]	866.714	59.67	140	343	2117.05	61.39	134	631	1050.83	61.54	145	442	1893.88	63.36	168	568	1976	228.858	5.5415
P35580-2	Isoform 2 of Myosin-10 OS=Homo sapiens GN=MYH10 - [MYH10_HUMAN]	866.663	59.29	140	343	2116.55	60.99	134	631	1051.5	61.19	146	441	1887.84	62.3	166	566	1992	230.637	5.56689
E7EVS6	Actin, cytoplasmic 1 (Fragment) OS=Homo sapiens GN=ACTB PE=1 SV=4 - [E7EVS6_HUMAN]	535.011	54.6	10	222	943.03	75.46	13	277	749.267	57.67	12	320	1101.2	75.46	13	343	163	17.8668	5.50342
V9HVZ7	Epididymis luminal protein 176 OS=Homo sapiens GN=HEL-176 PE=2 SV=1 - [V9HVZ7_HUMAN]	858.999	66.82	15	276	1274.38	75.78	20	297	947.721	83.86	21	318	1037.29	75.78	20	252	223	25.0195	5.65576
B4DUI8	cDNA FLJ52761, highly similar to Actin, aortic smooth muscle OS=Homo sapiens PE=2 SV=1 - [B4DUI8_HUMAN]	487.389	34.94	12	199	842.718	43.37	16	263	691.16	40.06	15	299	736.797	49.1	19	237	332	37.3387	5.5542
Q13813	Spectrin alpha chain, non-erythrocytic 1 OS=Homo sapiens GN=SPTAN1 PE=1 SV=3 - [SPTN1_HUMAN]	318.137	41.95	86	122	432.494	35.6	74	128	562.839	52.47	120	229	613.746	46.44	100	175	2472	284.364	5.35107
Q13813-2	Isoform 2 of Spectrin alpha chain, non-erythrocytic 1 OS=Homo sapiens GN=SPTAN1 - [SPTN1_HUMAN]	312.493	41.14	85	119	422.939	34.8	73	126	552.103	52.4	120	227	606.022	46.39	100	172	2477	284.919	5.35107
Q01082	Spectrin beta chain, non-erythrocytic 1 OS=Homo sapiens GN=SPTBN1 PE=1 SV=2 - [SPTB2_HUMAN]	270.836	32.91	65	103	470.489	29.95	62	140	495.794	45.26	95	219	517.818	41.24	86	163	2364	274.439	5.56689
Q09666	Neuroblast differentiation-associated protein AHNAK OS=Homo sapiens GN=AHNAK PE=1 SV=2 - [AHNK_HUMAN]	339.065	40.53	106	149	1141.52	55.01	181	354	493.967	53.41	144	214	1161.07	67.16	222	353	5890	628.699	6.15088
Q01082-3	Isoform 2 of Spectrin beta chain, non-erythrocytic 1 OS=Homo sapiens GN=SPTBN1 - [SPTB2_HUMAN]	245.987	33.04	59	96	403.975	30.07	57	121	441.619	46.13	89	195	438.628	41.25	78	140	2155	251.241	5.52881
O75369-2	Isoform 2 of Filamin-B OS=Homo sapiens GN=FLNB - [FLNB_HUMAN]	365.725	46.47	87	131	710.358	50.78	96	205	502.449	56.98	108	192	791.634	61.29	113	222	2578	275.496	5.78271
O75369-8	Isoform 8 of Filamin-B OS=Homo sapiens GN=FLNB - [FLNB_HUMAN]	355.13	44.25	86	128	682.8	48.46	95	196	494.612	54.8	108	190	769.962	58.75	112	216	2633	281.459	5.70654
O00159-3	Isoform 3 of Unconventional myosin-Ic OS=Homo sapiens GN=MYO1C - [MYO1C_HUMAN]	307.99	39.94	48	132	651.199	53.74	53	188	456.269	46.84	55	190	527.713	45.21	54	168	1044	119.554	9.45166
Q562R1	Beta-actin-like protein 2 OS=Homo sapiens GN=ACTBL2 PE=1 SV=2 - [ACTBL_HUMAN]	288.903	22.07	7	119	426.844	28.19	11	135	386.106	32.18	12	177	440.219	30.32	11	144	376	41.976	5.59229
Q16643	Drebrin OS=Homo sapiens GN=DBN1 PE=1 SV=4 - [DREB_HUMAN]	310.903	57.78	34	119	705.75	51.31	30	189	436.453	58.09	34	174	549.356	57.32	35	157	649	71.3854	4.44971
P21333-2	Isoform 2 of Filamin-A OS=Homo sapiens GN=FLNA - [FLNA_HUMAN]	263.137	38.76	69	101	581.746	41.34	76	158	417.112	46.57	90	167	612.899	54.53	99	170	2639	279.843	6.04932
D3DTH7	Myosin IC, isoform CRA_a OS=Homo sapiens GN=MYO1C PE=4 SV=1 - [D3DTH7_HUMAN]	262.795	39.56	38	115	478.126	48.96	39	143	365.918	45.36	41	157	392.65	40.72	39	129	862	98.8722	9.42236
Q562M3	Actin-like protein (Fragment) OS=Homo sapiens GN=ACT PE=3 SV=1 - [Q562M3_HUMAN]	329.44	60.19	4	120	647.229	90.29	6	173	384.206	62.14	5	146	393.844	90.29	6	125	103	11.5289	6.68311
Q14126	Desmoglein-2 OS=Homo sapiens GN=DSG2 PE=1 SV=2 - [DSG2_HUMAN]	226.181	34.79	26	82	706.399	40.61	30	198	348.595	44.54	33	144	651.936	44.45	35	189	1118	122.218	5.23682
Q53GG0	Epithelial protein lost in neoplasm beta variant (Fragment) OS=Homo sapiens PE=2 SV=1 - [Q53GG0_HUMAN]	160.527	56.26	41	68	390.841	59.03	39	114	315.175	67.59	53	138	416.495	63.37	53	129	759	85.2014	6.84424
P11021	78 kDa glucose-regulated protein OS=Homo sapiens GN=HSPA5 PE=1 SV=2 - [GRP78_HUMAN]	230.914	49.39	35	87	519.981	48.62	32	156	345.262	55.35	39	138	367.516	50.92	37	122	654	72.2884	5.16064
Q9UHB6-4	Isoform 4 of LIM domain and actin-binding protein 1 OS=Homo sapiens GN=LIMA1 - [LIMA1_HUMAN]	157.77	56.32	41	68	396.864	60.26	40	116	311.727	67.63	52	134	413.839	63.42	53	127	760	85.1713	6.75635
Q69YQ0-2	Isoform 2 of Cytospin-A OS=Homo sapiens GN=SPECC1L - [CYTSA_HUMAN]	235.149	44.71	45	94	398.429	39.61	37	111	332.914	45.73	48	133	406.286	43.78	43	116	1078	120.108	5.75732
A0A024R1X8	Junction plakoglobin, isoform CRA_a OS=Homo sapiens GN=JUP PE=4 SV=1 - [A0A024R1X8_HUMAN]	177.982	44.3	26	68	530.218	46.98	26	172	301.925	50.87	32	131	462.594	53.69	33	138	745	81.6748	6.13818
B3KSQ7	Drebrin 1, isoform CRA_d OS=Homo sapiens GN=DBN1 PE=2 SV=1 - [B3KSQ7_HUMAN]	232.236	43.74	26	92	563.893	38.06	23	156	310.352	44.07	25	130	439.339	50.25	29	129	599	65.5968	4.52588
Q7Z406-6	Isoform 6 of Myosin-14 OS=Homo sapiens GN=MYH14 - [MYH14_HUMAN]	266.006	34.95	59	101	727.069	39.29	72	209	321.793	37.74	69	128	609.399	44.33	86	186	2003	228.526	5.60498
P13645	Keratin, type I cytoskeletal 10 OS=Homo sapiens GN=KRT10 PE=1 SV=6 - [K1C10_HUMAN]	575.397	53.25	32	260	131.239	28.94	16	41	279.271	49.66	29	128	232.933	47.26	24	74	584	58.7917	5.21143
H6VRF8	Keratin 1 OS=Homo sapiens GN=KRT1 PE=3 SV=1 - [H6VRF8_HUMAN]	662.684	59.01	47	279	187.28	38.98	22	59	269.628	55.59	36	122	242.136	53.11	33	74	644	66.013	8.11865
Q9BYX7	Putative beta-actin-like protein 3 OS=Homo sapiens GN=POTEKP PE=5 SV=1 - [ACTBM_HUMAN]	264.546	24	8	99	464.622	15.73	5	130	303.008	24	8	121	392.685	24	8	115	375	41.9888	6.32861
O43795-2	Isoform 2 of Unconventional myosin-Ib OS=Homo sapiens GN=MYO1B - [MYO1B_HUMAN]	177.309	35.81	34	78	291.988	38.68	38	91	254.446	42.58	41	121	294.642	42.76	42	107	1078	124.872	9.20264
P35908	Keratin, type II cytoskeletal 2 epidermal OS=Homo sapiens GN=KRT2 PE=1 SV=2 - [K22E_HUMAN]	402.496	80.44	43	189	102.348	38.5	19	40	266.932	79.5	42	121	156.895	56.81	24	48	639	65.3932	8.00146
	>sp|K22E_HUMAN|	393.465	80.62	43	188	102.348	38.14	19	40	265.012	79.69	42	121	150.277	57.21	24	47	645	65.8254	8.00146
Q562L9	Actin-like protein (Fragment) OS=Homo sapiens GN=ACT PE=3 SV=1 - [Q562L9_HUMAN]	311.638	53.4	3	97	602.61	86.41	6	139	374.353	58.25	5	120	364.719	86.41	6	89	103	11.5489	6.52197
P0CG38	POTE ankyrin domain family member I OS=Homo sapiens GN=POTEI PE=3 SV=1 - [POTEI_HUMAN]	160.431	6.7	7	85	328.701	8	7	105	205.53	7.53	8	117	302.724	10.88	9	109	1075	121.205	6.21436
P11142	Heat shock cognate 71 kDa protein OS=Homo sapiens GN=HSPA8 PE=1 SV=1 - [HSP7C_HUMAN]	163.838	41.33	25	75	432.852	48.61	29	146	239.921	50.31	31	108	372.723	49.38	32	123	646	70.8542	5.51611
Q15149-4	Isoform 4 of Plectin OS=Homo sapiens GN=PLEC - [PLEC_HUMAN]	162.535	17.57	60	69	525.582	30	117	164	250.262	24.59	88	107	539.125	32.33	128	166	4547	515.884	5.79541
Q15149-3	Isoform 3 of Plectin OS=Homo sapiens GN=PLEC - [PLEC_HUMAN]	162.535	17.48	60	69	529.526	30.11	116	164	246.513	24.27	87	105	549.78	32.89	129	168	4570	517.716	5.74463
D6R9W4	Drebrin (Fragment) OS=Homo sapiens GN=DBN1 PE=1 SV=1 - [D6R9W4_HUMAN]	170.37	71.61	26	67	273.161	58.36	22	79	242.629	66.25	25	101	247.683	70.66	26	72	317	36.449	5.13525
O43707	Alpha-actinin-4 OS=Homo sapiens GN=ACTN4 PE=1 SV=2 - [ACTN4_HUMAN]	175.133	38.09	28	67	510.542	48.41	36	162	229.801	45.99	38	96	379.769	47.31	39	120	911	104.788	5.43994
Q5HYL6	Putative uncharacterized protein DKFZp686E1899 OS=Homo sapiens GN=DKFZp686E1899 PE=2 SV=1 - [Q5HYL6_HUMAN]	145.906	66.19	22	60	256.36	55.11	17	79	205.896	66.19	23	89	257.103	64.77	20	87	352	39.5302	5.18604
Q92614-4	Isoform 4 of Unconventional myosin-XVIIIa OS=Homo sapiens GN=MYO18A - [MY18A_HUMAN]	140.579	29.52	46	55	330.581	31	51	91	217.045	33.99	56	86	325.003	33.06	60	96	2039	231.097	6.20166
P06396-2	Isoform 2 of Gelsolin OS=Homo sapiens GN=GSN - [GELS_HUMAN]	160.228	46.24	21	64	420.433	48.97	22	115	220.03	47.2	25	86	317.354	51.03	26	90	731	80.5905	5.84619
Q9Y608-4	Isoform 4 of Leucine-rich repeat flightless-interacting protein 2 OS=Homo sapiens GN=LRRFIP2 - [LRRF2_HUMAN]	124.565	38.44	15	53	96.0732	26.89	11	28	181.921	47.17	19	85	119.065	34.67	13	44	424	48.2646	5.41455
Q562Z4	Actin-like protein (Fragment) OS=Homo sapiens GN=ACT PE=3 SV=1 - [Q562Z4_HUMAN]					423.971	79.61	5	107	226.577	39.81	5	84					103	11.548	7.57666
P06753-6	Isoform 6 of Tropomyosin alpha-3 chain OS=Homo sapiens GN=TPM3 - [TPM3_HUMAN]	109.326	61.69	22	51	226.942	64.92	26	80	187.852	66.13	25	83	291.743	69.76	26	105	248	28.9047	4.75439
P06753-3	Isoform 3 of Tropomyosin alpha-3 chain OS=Homo sapiens GN=TPM3 - [TPM3_HUMAN]	109.326	61.94	22	51	228.763	68.02	27	81	187.852	66.4	25	83	287.651	63.56	25	104	247	28.9378	4.80518
Q63HQ8	Putative uncharacterized protein DKFZp686M21196 OS=Homo sapiens GN=DKFZp686M21196 PE=2 SV=1 - [Q63HQ8_HUMAN]	100.087	53.02	24	40	218.691	46.42	26	65	200.393	62.45	35	83	236.781	56.98	29	70	530	58.5446	9.81787
O00515	Ladinin-1 OS=Homo sapiens GN=LAD1 PE=1 SV=2 - [LAD1_HUMAN]	93.4143	56.29	25	41	192.498	48.74	26	59	183.467	65.96	37	80	236.103	65.96	33	72	517	57.0968	9.67139
B7Z4V2	cDNA FLJ51907, highly similar to Stress-70 protein, mitochondrial OS=Homo sapiens PE=2 SV=1 - [B7Z4V2_HUMAN]	128.981	43.76	24	46	345.221	62.26	34	99	198.939	48.87	30	78	268.381	47.07	27	82	665	72.3561	5.93506
Q00610-2	Isoform 2 of Clathrin heavy chain 1 OS=Homo sapiens GN=CLTC - [CLH1_HUMAN]	112.326	24.83	29	45	156.579	19.83	25	52	156.142	26.36	34	73	213.358	27.7	38	67	1639	187.771	5.69385
P35527	Keratin, type I cytoskeletal 9 OS=Homo sapiens GN=KRT9 PE=1 SV=3 - [K1C9_HUMAN]	517.296	85.71	35	218	169.152	42.05	15	45	173.742	52.65	24	70	142.568	57.62	21	39	623	62.0268	5.23682
P05787	Keratin, type II cytoskeletal 8 OS=Homo sapiens GN=KRT8 PE=1 SV=7 - [K2C8_HUMAN]	120.525	66.87	31	49	357.019	68.32	31	100	171.271	73.5	34	68	268.639	72.26	34	78	483	53.6711	5.59229
B4DWT5	cDNA FLJ50720, highly similar to Homo sapiens tropomyosin 3 (TPM3), transcript variant 2, mRNA OS=Homo sapiens PE=2 SV=1 - [B4DWT5_HUMAN]	93.2432	67.49	16	41	240.851	69.95	18	81	138.862	71.43	17	65	262.42	67.98	17	90	203	23.802	4.80518
P08238	Heat shock protein HSP 90-beta OS=Homo sapiens GN=HSP90AB1 PE=1 SV=4 - [HS90B_HUMAN]	86.6661	37.29	20	42	202.73	36.19	23	59	154.668	40.61	26	64	205.769	40.61	29	60	724	83.2121	5.03369
Q5QD01	SP-A receptor subunit SP-R210 alphaS OS=Homo sapiens GN=MYO18A PE=2 SV=1 - [Q5QD01_HUMAN]	95.2969	26.12	31	37	250.416	28.97	35	67	161.925	31.75	40	62	231.212	29.92	41	66	1581	180.439	5.90967
Q9Y2W1	Thyroid hormone receptor-associated protein 3 OS=Homo sapiens GN=THRAP3 PE=1 SV=2 - [TR150_HUMAN]	32.2772	16.02	14	17	21.8953	8.17	6	7	111.629	35.5	36	60	12.9069	5.97	4	4	955	108.601	10.1548
E9PHV5	Sperm-specific antigen 2 OS=Homo sapiens GN=SSFA2 PE=1 SV=1 - [E9PHV5_HUMAN]	101.738	33.47	28	38	288.89	40.91	34	84	144.278	43.17	37	58	243.969	38.8	35	76	1237	136.054	5.19873
B2RAH5	Protein phosphatase 1 regulatory subunit 12 OS=Homo sapiens PE=2 SV=1 - [B2RAH5_HUMAN]	103.626	33.69	30	40	174.244	26.99	28	50	145.608	34.66	37	58	213.673	31.07	35	68	1030	115.259	5.42725
P08107	Heat shock 70 kDa protein 1A/1B OS=Homo sapiens GN=HSPA1A PE=1 SV=5 - [HSP71_HUMAN]	70.4778	34.17	17	32	181.021	38.38	22	64	112.456	41.81	23	57	182.207	45.24	25	66	641	70.009	5.65576
P67936	Tropomyosin alpha-4 chain OS=Homo sapiens GN=TPM4 PE=1 SV=3 - [TPM4_HUMAN]	93.8606	59.27	18	40	144.155	60.48	19	52	116.087	61.29	20	56	181.783	70.16	23	68	248	28.5045	4.69092
L0R5C4	Alternative protein POTEM OS=Homo sapiens GN=POTEM PE=3 SV=1 - [L0R5C4_HUMAN]	108.976	13.68	6	43	278.084	17.71	6	83	129.774	13.68	6	55	180.311	13.68	6	57	446	50.3049	5.51611
	>sp|TRYP_PIG|	125.38	25.11	4	57	44.5021	25.11	4	12	106.367	25.11	4	53	88.1063	25.11	4	26	231	24.3938	7.18115
Q14247	Src substrate cortactin OS=Homo sapiens GN=CTTN PE=1 SV=2 - [SRC8_HUMAN]	96.3569	38	16	30	75.5195	32.55	14	19	138.747	50.18	30	53	49.4374	27.45	10	13	550	61.5485	5.40186
P05783	Keratin, type I cytoskeletal 18 OS=Homo sapiens GN=KRT18 PE=1 SV=2 - [K1C18_HUMAN]	74.014	37.67	14	36	244.646	58.37	23	75	111.27	52.79	20	52	236.225	58.37	21	77	430	48.0285	5.45264
Q13045	Protein flightless-1 homolog OS=Homo sapiens GN=FLII PE=1 SV=2 - [FLII_HUMAN]	84.9806	24.43	23	38	115.227	16	17	31	124.763	25.61	27	52	128.228	26.56	25	39	1269	144.66	6.04932
Q13045-2	Isoform 2 of Protein flightless-1 homolog OS=Homo sapiens GN=FLII - [FLII_HUMAN]	80.7886	25.45	23	37	109.83	16.64	17	30	124.981	26.69	27	51	122.133	27.68	24	38	1214	138.405	6.07471
Q14247-3	Isoform 3 of Src substrate cortactin OS=Homo sapiens GN=CTTN - [SRC8_HUMAN]	93.8871	38.21	15	29	72.3632	32.36	13	18	130.686	52.24	29	50	46.3956	26.9	9	12	513	57.4315	5.32568
P07437	Tubulin beta chain OS=Homo sapiens GN=TUBB PE=1 SV=2 - [TBB5_HUMAN]	65.7703	31.31	13	28	135.433	29.73	12	45	110.111	41.22	17	49	101.994	35.59	15	37	444	49.639	4.89404
M1VPF4	Tyrosine-protein kinase receptor OS=Homo sapiens GN=TPM3-ROS1 PE=2 SV=1 - [M1VPF4_HUMAN]	77.6748	18.48	16	32	168.097	19.59	20	61	111.775	21.1	20	48	184.4	19.03	19	66	725	82.3675	4.97021
P08754	Guanine nucleotide-binding protein G(k) subunit alpha OS=Homo sapiens GN=GNAI3 PE=1 SV=3 - [GNAI3_HUMAN]	57.0961	35.88	10	25	76.3217	34.18	11	27	104.421	42.09	14	47	105.152	46.61	16	32	354	40.5063	5.69385
P10809	60 kDa heat shock protein, mitochondrial OS=Homo sapiens GN=HSPD1 PE=1 SV=2 - [CH60_HUMAN]	52.5772	30.89	13	19	94.0241	34.03	14	29	107.262	44.15	18	46	93.9673	40.14	16	25	573	61.0164	5.87158
P11940	Polyadenylate-binding protein 1 OS=Homo sapiens GN=PABPC1 PE=1 SV=2 - [PABP1_HUMAN]	40.6897	28.14	13	19	27.576	13.05	8	9	92.5958	39.94	21	46	45.2211	16.35	11	15	636	70.6259	9.49561
P08727	Keratin, type I cytoskeletal 19 OS=Homo sapiens GN=KRT19 PE=1 SV=4 - [K1C19_HUMAN]	104.991	67	23	46	182.688	73.5	25	53	98.3633	62.75	23	45	162.04	71	27	52	400	44.0791	5.13525
P12814-2	Isoform 2 of Alpha-actinin-1 OS=Homo sapiens GN=ACTN1 - [ACTN1_HUMAN]	45.7708	18.94	13	19	169.872	31.91	22	54	102.619	32.13	22	45	149.027	34.95	24	46	887	102.644	5.50342
P46940	Ras GTPase-activating-like protein IQGAP1 OS=Homo sapiens GN=IQGAP1 PE=1 SV=1 - [IQGA1_HUMAN]	64.3389	16.29	18	24	98.2646	18.29	25	36	107.247	24.2	31	45	124.02	22.21	25	37	1657	189.134	6.48096
P07951-2	Isoform 2 of Tropomyosin beta chain OS=Homo sapiens GN=TPM2 - [TPM2_HUMAN]	86.6262	47.18	19	34	128.676	46.13	21	41	101.989	59.15	24	44	176.113	62.32	25	57	284	32.9696	4.66553
P09493-4	Isoform 4 of Tropomyosin alpha-1 chain OS=Homo sapiens GN=TPM1 - [TPM1_HUMAN]	79.4511	52.11	20	32	125.728	50.35	21	42	98.566	54.23	20	44	164.09	67.25	25	57	284	32.8278	4.76709
P09493-10	Isoform 10 of Tropomyosin alpha-1 chain OS=Homo sapiens GN=TPM1 - [TPM1_HUMAN]	79.4511	52.11	20	32	129.26	55.99	22	43	98.566	54.23	20	44	162.99	67.25	25	57	284	32.8457	4.76709
P09493-3	Isoform 3 of Tropomyosin alpha-1 chain OS=Homo sapiens GN=TPM1 - [TPM1_HUMAN]	77.1021	47.54	19	31	119.344	45.77	20	40	98.1656	52.46	20	44	159.98	68.66	25	57	284	32.8558	4.77979
A0A0A0MRM8	Unconventional myosin-VI OS=Homo sapiens GN=MYO6 PE=4 SV=1 - [A0A0A0MRM8_HUMAN]	67.4352	21.71	20	25	144.513	19.47	20	47	108.144	25.86	28	44	161.494	29.29	32	48	1253	144.924	8.55811
O15020	Spectrin beta chain, non-erythrocytic 2 OS=Homo sapiens GN=SPTBN2 PE=1 SV=3 - [SPTN2_HUMAN]	51.627	10.75	18	20	97.3352	13.93	25	29	97.8063	20.92	38	44	117.159	16.99	28	35	2390	271.157	6.11279
Q05D20	THRAP3 protein (Fragment) OS=Homo sapiens GN=THRAP3 PE=2 SV=1 - [Q05D20_HUMAN]	29.7328	27.08	7	10	31.7993	24.4	6	10	107.499	30.29	13	44	27.8316	24.4	6	8	373	41.589	11.5903
H0YK48	Tropomyosin alpha-1 chain OS=Homo sapiens GN=TPM1 PE=1 SV=1 - [H0YK48_HUMAN]	72.7699	54.03	17	32	135.479	55.65	18	47	97.3762	48.39	17	43	161.107	65.32	22	57	248	28.5625	4.76709
Q5TCU3	Tropomyosin beta chain OS=Homo sapiens GN=TPM2 PE=1 SV=1 - [Q5TCU3_HUMAN]	84.9224	44.72	18	33	131.202	50.35	22	42	100.042	56.69	23	43	172.736	57.39	24	56	284	32.7946	4.67822
O60716-21	Isoform 3A of Catenin delta-1 OS=Homo sapiens GN=CTNND1 - [CTND1_HUMAN]	45.3846	21.27	12	19	152.531	31.49	20	49	86.5234	33.77	20	43	130.838	38.1	23	45	832	92.6178	7.15186
B9EGI2	Myosin phosphatase Rho interacting protein OS=Homo sapiens GN=MPRIP PE=2 SV=1 - [B9EGI2_HUMAN]	65.1318	30.09	24	28	227.25	43.3	36	64	88.8908	41.08	34	42	219.677	51.59	44	71	1037	117.974	6.39209
P52907	F-actin-capping protein subunit alpha-1 OS=Homo sapiens GN=CAPZA1 PE=1 SV=3 - [CAZA1_HUMAN]	65.883	50	10	31	186.762	43.71	10	65	82.5193	52.45	11	42	182.303	65.38	14	62	286	32.9023	5.69385
P07900	Heat shock protein HSP 90-alpha OS=Homo sapiens GN=HSP90AA1 PE=1 SV=5 - [HS90A_HUMAN]	48.9161	22.81	13	24	146.061	23.22	17	45	96.9807	30.74	18	42	144.107	30.19	24	45	732	84.6067	5.021
B3KTP9	cDNA FLJ38578 fis, clone HCHON2007674, highly similar to NUCLEOLIN OS=Homo sapiens PE=2 SV=1 - [B3KTP9_HUMAN]	51.2065	26.07	14	21	50.3736	19.59	10	15	84.5779	39.65	22	42	70.5827	29.38	16	20	633	68.4011	4.65283
Q14573	Inositol 1,4,5-trisphosphate receptor type 3 OS=Homo sapiens GN=ITPR3 PE=1 SV=2 - [ITPR3_HUMAN]	57.1751	8.5	15	21	167.728	15.24	28	49	98.4343	14.94	27	41	185.43	18.64	36	57	2671	303.912	6.48096
P68371	Tubulin beta-4B chain OS=Homo sapiens GN=TUBB4B PE=1 SV=1 - [TBB4B_HUMAN]	61.1648	31.24	13	26	109.106	26.97	11	37	90.3395	37.08	15	40	100.067	36.63	16	34	445	49.799	4.89404
A0A024RAC0	Leucine zipper protein 1, isoform CRA_a OS=Homo sapiens GN=LUZP1 PE=4 SV=1 - [A0A024RAC0_HUMAN]	53.284	24.16	19	22	177.62	35.5	32	53	99.9375	32.9	29	39	177.376	35.69	33	56	1076	120.231	8.63135
B2RBH2	cDNA, FLJ95508, highly similar to Homo sapiens 5'-nucleotidase, ecto (CD73) (NT5E), mRNA OS=Homo sapiens PE=2 SV=1 - [B2RBH2_HUMAN]	65.1572	35.02	16	24	133.745	35.37	14	37	99.018	39.37	22	39	145.254	45.64	24	41	574	63.3555	7.03467
J3KNL6	Protein transport protein Sec16A OS=Homo sapiens GN=SEC16A PE=1 SV=1 - [J3KNL6_HUMAN]					29.4629	4.75	6	8	95.4405	20.11	26	39	55.2564	9.38	12	15	2357	251.738	5.79541
F1T0I1	Protein transport protein Sec16A OS=Homo sapiens GN=SEC16A PE=2 SV=1 - [F1T0I1_HUMAN]					29.4629	4.8	6	8	97.1853	20.09	26	39	55.2564	9.47	12	15	2334	249.328	5.84619
B4E2G8	cDNA FLJ54047, highly similar to Alpha-1 catenin (Cadherin-associated protein) OS=Homo sapiens PE=2 SV=1 - [B4E2G8_HUMAN]	69.9927	27.61	17	25	145.48	35.24	21	44	99.898	37.26	24	38	178.223	44	27	49	891	98.3226	6.37939
Q5CAQ5	Tumor rejection antigen (Gp96) 1 OS=Homo sapiens GN=TRA1 PE=2 SV=1 - [Q5CAQ5_HUMAN]	47.8696	25.56	18	19	104.894	22.32	18	33	91.6564	33.67	27	38	96.1944	26.93	20	28	802	92.2823	4.85596
P52272-2	Isoform 2 of Heterogeneous nuclear ribonucleoprotein M OS=Homo sapiens GN=HNRNPM - [HNRPM_HUMAN]	48.0042	23.73	11	18	80.454	30.68	15	24	84.5534	34.15	18	38	71.0353	30.39	14	21	691	73.5724	8.82178
P07355	Annexin A2 OS=Homo sapiens GN=ANXA2 PE=1 SV=2 - [ANXA2_HUMAN]	76.7268	45.13	16	27	105.446	47.79	18	31	101.711	52.8	23	37	109.515	50.44	20	32	339	38.5798	7.75244
P63096	Guanine nucleotide-binding protein G(i) subunit alpha-1 OS=Homo sapiens GN=GNAI1 PE=1 SV=2 - [GNAI1_HUMAN]	42.2342	32.49	10	18	55.463	24.58	8	21	73.3374	36.44	11	37	53.0616	39.27	13	20	354	40.3352	5.97314
P15924	Desmoplakin OS=Homo sapiens GN=DSP PE=1 SV=3 - [DESP_HUMAN]	114.042	17.97	45	52	166.504	17.73	44	53	86.5694	13.17	29	36	154.671	17.62	40	51	2871	331.569	6.81494
P42166	Lamina-associated polypeptide 2, isoform alpha OS=Homo sapiens GN=TMPO PE=1 SV=2 - [LAP2A_HUMAN]	75.4393	42.22	20	26	129.057	43.95	21	34	98.0207	48.27	23	36	118.262	47.41	24	31	694	75.4456	7.66455
B3KT06	cDNA FLJ37398 fis, clone BRAMY2027467, highly similar to Tubulin alpha-ubiquitous chain OS=Homo sapiens PE=2 SV=1 - [B3KT06_HUMAN]	64.0945	41.83	11	25	114.144	33.41	8	29	89.1983	60.58	16	36	106.24	45.91	13	30	416	46.3119	5.13525
P67936-2	Isoform 2 of Tropomyosin alpha-4 chain OS=Homo sapiens GN=TPM4 - [TPM4_HUMAN]	73.3836	45.07	16	30	105.944	50	17	37	73.8842	51.76	18	35	149.252	63.73	22	51	284	32.7026	4.729
P04899	Guanine nucleotide-binding protein G(i) subunit alpha-2 OS=Homo sapiens GN=GNAI2 PE=1 SV=3 - [GNAI2_HUMAN]	59.4228	48.45	13	26	85.0645	38.03	12	25	88.5192	48.45	14	34	98.6886	54.93	17	30	355	40.4251	5.5415
Q53GA7	Tubulin alpha 6 variant (Fragment) OS=Homo sapiens PE=2 SV=1 - [Q53GA7_HUMAN]	51.5276	30.51	9	21	107.585	20.71	6	27	81.1637	46.77	14	34	101.085	42.54	13	29	449	49.7914	5.13525
P02533	Keratin, type I cytoskeletal 14 OS=Homo sapiens GN=KRT14 PE=1 SV=4 - [K1C14_HUMAN]	230.744	59.75	32	90	41.5564	30.51	12	13	74.8361	41.95	19	34	67.1446	40.68	16	21	472	51.5294	5.16064
D3DTX6	Neurabin-2 OS=Homo sapiens GN=PPP1R9B PE=4 SV=1 - [D3DTX6_HUMAN]	39.25	17.63	10	14	75.053	21.42	10	20	89.3763	28.4	18	33	113.841	30.6	17	31	817	89.2798	4.97021
Q05682-5	Isoform 5 of Caldesmon OS=Homo sapiens GN=CALD1 - [CALD1_HUMAN]	51.6089	42.29	17	18	71.713	35.53	13	19	82.5171	53.57	24	33	96.907	44.55	19	28	532	61.1762	6.7124
Q13885	Tubulin beta-2A chain OS=Homo sapiens GN=TUBB2A PE=1 SV=1 - [TBB2A_HUMAN]	52.5872	25.62	10	21	78.4073	22.25	9	27	75.9561	31.46	12	33	70.3169	24.94	11	24	445	49.875	4.89404
A4QN19	SEC16A protein (Fragment) OS=Homo sapiens GN=SEC16A PE=2 SV=1 - [A4QN19_HUMAN]					29.4629	6.49	6	8	81.9468	21.13	21	33	45.3571	9.9	10	12	1727	186.378	5.40186
Q6DCA8	BCLAF1 protein (Fragment) OS=Homo sapiens GN=BCLAF1 PE=2 SV=1 - [Q6DCA8_HUMAN]	13.7864	12.5	6	7					63.6011	31.03	21	33					680	77.9012	10.2134
P55072	Transitional endoplasmic reticulum ATPase OS=Homo sapiens GN=VCP PE=1 SV=4 - [TERA_HUMAN]	39.4798	22.21	14	15	99.8463	27.54	17	30	79.2647	32.26	21	31	115.095	30.15	20	34	806	89.2657	5.26221
O94832	Unconventional myosin-Id OS=Homo sapiens GN=MYO1D PE=1 SV=2 - [MYO1D_HUMAN]	48.2728	16.5	14	19	127.989	23.06	20	39	75.0282	19.68	18	30	112.026	26.54	22	39	1006	116.129	9.39307
O00161	Synaptosomal-associated protein 23 OS=Homo sapiens GN=SNAP23 PE=1 SV=1 - [SNP23_HUMAN]	29.7375	42.18	6	12	108.947	54.98	10	43	62.2473	60.66	9	30	121.99	60.66	11	36	211	23.3395	5.0083
B2RA70	Non-specific protein-tyrosine kinase OS=Homo sapiens PE=2 SV=1 - [B2RA70_HUMAN]	59.5031	35.54	15	26	79.9398	33.89	14	26	74.8602	40.33	17	30	107.625	41.07	19	35	543	60.7925	6.7417
P04350	Tubulin beta-4A chain OS=Homo sapiens GN=TUBB4A PE=1 SV=2 - [TBB4A_HUMAN]	48.956	26.8	10	21	87.5438	23.42	9	30	70.808	32.66	12	30	59.8485	25.45	11	21	444	49.5539	4.88135
H0Y2S9	Myosin phosphatase Rho-interacting protein (Fragment) OS=Homo sapiens GN=MPRIP PE=1 SV=3 - [H0Y2S9_HUMAN]	45.636	12.65	17	20	161.242	21.35	28	47	64.2355	16.56	21	29	162.936	21.35	31	48	1794	203.36	5.22412
Q96N67-4	Isoform 4 of Dedicator of cytokinesis protein 7 OS=Homo sapiens GN=DOCK7 - [DOCK7_HUMAN]	25.6052	7.82	13	13	84.1744	10.39	19	28	66.2251	15.11	24	29	124.281	16.92	28	39	2098	238.123	6.82959
X5D7K9	Major vault protein isoform C (Fragment) OS=Homo sapiens GN=MVP PE=2 SV=1 - [X5D7K9_HUMAN]	18.5786	10.64	6	12	54.7367	19.71	11	17	57.6296	26.72	16	29	71.5852	24.06	14	24	827	91.903	5.41455
P13647	Keratin, type II cytoskeletal 5 OS=Homo sapiens GN=KRT5 PE=1 SV=3 - [K2C5_HUMAN]	157.685	51.19	34	70	35.0537	19.66	11	12	61.8648	38.31	21	29	38.8605	22.37	12	13	590	62.34	7.73779
B1AK87	Capping protein (Actin filament) muscle Z-line, beta, isoform CRA_a OS=Homo sapiens GN=CAPZB PE=1 SV=1 - [B1AK87_HUMAN]	44.865	41.15	9	16	120.412	57.31	14	36	75.7092	53.85	14	28	137.082	60.38	14	38	260	29.2768	6.91748
B4DRR0	cDNA FLJ53910, highly similar to Keratin, type II cytoskeletal 6A OS=Homo sapiens PE=2 SV=1 - [B4DRR0_HUMAN]	144.389	50.65	26	59	26.7652	15.51	8	9	69.7962	40.56	18	28	50.2892	30.65	13	16	535	57.8032	8.00146
M0QZM1	Heterogeneous nuclear ribonucleoprotein M (Fragment) OS=Homo sapiens GN=HNRNPM PE=1 SV=1 - [M0QZM1_HUMAN]	34.9511	24.54	6	13	47.2705	33.94	9	14	59.8456	34.2	10	27	48.1503	31.59	8	15	383	40.0163	6.72705
Q14204	Cytoplasmic dynein 1 heavy chain 1 OS=Homo sapiens GN=DYNC1H1 PE=1 SV=5 - [DYHC1_HUMAN]	36.2902	4.13	14	15	103.775	7.51	27	32	54.93	6.28	21	26	152.538	11.32	41	50	4646	532.072	6.40479
P04406	Glyceraldehyde-3-phosphate dehydrogenase OS=Homo sapiens GN=GAPDH PE=1 SV=3 - [G3P_HUMAN]	53.9456	46.57	11	23	35.5085	24.48	5	13	57.5584	51.64	12	26	65.5705	34.03	9	22	335	36.0304	8.45557
B4DW34	cDNA FLJ56798, highly similar to Acid sphingomyelinase-like phosphodiesterase 3b (EC 3.1.4.-) OS=Homo sapiens PE=2 SV=1 - [B4DW34_HUMAN]	24.9438	22.42	6	12	41.9019	15.82	4	19	53.4026	30.11	9	26	46.4957	20.22	6	17	455	50.7531	5.64307
P68366-2	Isoform 2 of Tubulin alpha-4A chain OS=Homo sapiens GN=TUBA4A - [TBA4A_HUMAN]	37.5979	29.79	8	15	34.3356	22.86	7	12	55.6596	41.11	11	25	61.943	35.1	10	19	433	48.2976	5.0083
E9PMS6	LIM domain only protein 7 OS=Homo sapiens GN=LMO7 PE=1 SV=1 - [E9PMS6_HUMAN]	30.0784	15.06	11	11	80.109	21.25	18	22	50.0866	25.88	21	25	66.7711	23.29	17	19	1275	145.334	7.29834
P67809	Nuclease-sensitive element-binding protein 1 OS=Homo sapiens GN=YBX1 PE=1 SV=3 - [YBOX1_HUMAN]	14.3935	36.73	5	6	36.2725	33.33	5	15	45.9029	48.77	10	25	17.4681	35.49	4	7	324	35.9027	9.87646
Q0QEN7	ATP synthase subunit beta (Fragment) OS=Homo sapiens GN=ATP5B PE=2 SV=1 - [Q0QEN7_HUMAN]	36.6257	39.1	10	13	75.9056	31.01	9	20	62.8264	51.91	15	24	72.1582	50.79	14	20	445	48.083	5.07178
A0A024R2T5	CUB domain containing protein 1, isoform CRA_a OS=Homo sapiens GN=CDCP1 PE=4 SV=1 - [A0A024R2T5_HUMAN]	29.0263	11.24	8	12	57.7845	20.22	13	21	52.8219	18.06	12	24	48.7837	20.81	14	18	836	92.8144	8.03076
P07814	Bifunctional glutamate/proline--tRNA ligase OS=Homo sapiens GN=EPRS PE=1 SV=5 - [SYEP_HUMAN]	16.387	9.26	9	9	57.978	14.42	16	21	52.6413	17.99	19	24	47.1324	16.14	18	18	1512	170.483	7.32764
P08779	Keratin, type I cytoskeletal 16 OS=Homo sapiens GN=KRT16 PE=1 SV=4 - [K1C16_HUMAN]	128.061	55.18	27	60	27.0181	17.97	8	9	55.6768	34.25	14	24	33.5139	27.91	12	12	473	51.2362	5.04639
Q8IVT2	Mitotic interactor and substrate of PLK1 OS=Homo sapiens GN=MISP PE=1 SV=1 - [MISP_HUMAN]	25.1422	19.73	9	10	114.134	29.9	16	27	52.3712	32.4	17	23	95.7737	30.34	17	27	679	75.311	6.82959
P49327	Fatty acid synthase OS=Homo sapiens GN=FASN PE=1 SV=3 - [FAS_HUMAN]	22.6531	4.5	8	9	99.7165	13.62	26	32	54.4963	10.2	19	23	67.7306	10.79	21	25	2511	273.254	6.44287
Q53X12	V-type proton ATPase subunit a OS=Homo sapiens PE=1 SV=1 - [Q53X12_HUMAN]	20.5575	9.63	7	8	60.6442	14.44	10	20	53.9131	19.86	14	23	87.0233	16.85	11	23	831	95.6888	6.69775
P14618	Pyruvate kinase PKM OS=Homo sapiens GN=PKM PE=1 SV=4 - [KPYM_HUMAN]	34.2596	31.83	13	14	51.5967	28.63	12	14	61.4278	38.79	20	23	66.8302	34.65	16	19	531	57.9	7.84033
P04075	Fructose-bisphosphate aldolase A OS=Homo sapiens GN=ALDOA PE=1 SV=2 - [ALDOA_HUMAN]	26.8905	25.55	6	9	32.8449	25	6	9	55.5039	28.3	9	23	20.6137	11.81	3	5	364	39.3953	8.08936
P11217-2	Isoform 2 of Glycogen phosphorylase, muscle form OS=Homo sapiens GN=PYGM - [PYGM_HUMAN]	16.7957	6.63	6	8	6.46868	3.05	2	2	49.0489	20.95	16	23					754	87.262	8.41162
O75955	Flotillin-1 OS=Homo sapiens GN=FLOT1 PE=1 SV=3 - [FLOT1_HUMAN]	46.2976	33.72	12	16	70.0609	40.05	15	22	59.248	39.34	15	22	98.4295	53.4	19	29	427	47.3256	7.48877
B4DGU4	Catenin beta-1 OS=Homo sapiens GN=CTNNB1 PE=2 SV=1 - [B4DGU4_HUMAN]	24.7699	14.6	7	12	82.0089	21.58	12	26	51.9414	23.39	13	22	91.5109	27.65	15	29	774	84.7119	5.92236
P04792	Heat shock protein beta-1 OS=Homo sapiens GN=HSPB1 PE=1 SV=2 - [HSPB1_HUMAN]	55.5898	49.27	7	18	154.255	57.07	10	38	66.4915	59.02	10	22	107.061	52.68	8	26	205	22.7685	6.40479
P02545	Prelamin-A/C OS=Homo sapiens GN=LMNA PE=1 SV=1 - [LMNA_HUMAN]	46.4683	30.57	15	17	63.0177	28.16	15	19	60.6728	30.27	16	22	77.3675	25.75	15	23	664	74.0947	7.02002
P63092	Guanine nucleotide-binding protein G(s) subunit alpha isoforms short OS=Homo sapiens GN=GNAS PE=1 SV=1 - [GNAS2_HUMAN]	17.1488	20.05	7	9	38.2176	20.81	7	12	51.5119	22.34	8	22	51.0087	23.86	8	15	394	45.6359	5.8208
Q86YZ3	Hornerin OS=Homo sapiens GN=HRNR PE=1 SV=2 - [HORN_HUMAN]	79.3684	16.67	15	34					54.8199	15.61	13	22	16.6883	4.49	4	4	2850	282.228	10.0376
P47755	F-actin-capping protein subunit alpha-2 OS=Homo sapiens GN=CAPZA2 PE=1 SV=3 - [CAZA2_HUMAN]	21.5366	15.38	3	8	58.7282	20.98	4	19	43.0545	36.36	7	21	67.1477	42.31	8	25	286	32.9286	5.84619
B4DPW9	cDNA FLJ51929, highly similar to Plastin-3 OS=Homo sapiens PE=2 SV=1 - [B4DPW9_HUMAN]	31.0795	21.06	10	13	72.4793	17.58	10	22	48.4328	25.87	13	21	52.0286	19.73	9	15	603	67.5566	5.65576
Q0IIN1	Keratin 77 OS=Homo sapiens GN=KRT77 PE=2 SV=1 - [Q0IIN1_HUMAN]	90.3709	22.84	12	57					38.9708	9	5	20	33.8897	9	5	14	578	61.7644	5.84619
P06748-2	Isoform 2 of Nucleophosmin OS=Homo sapiens GN=NPM1 - [NPM_HUMAN]	33.542	29.81	7	13	76.9106	24.53	8	21	52.1489	32.83	9	19	66.8021	29.81	8	19	265	29.4462	4.61475
Q53SY7	Putative uncharacterized protein CAD (Fragment) OS=Homo sapiens GN=CAD PE=3 SV=1 - [Q53SY7_HUMAN]	26.6175	7.16	11	12	48.3775	9.48	15	17	36.1624	10.93	16	19	60.5141	10.6	15	19	2151	235.029	6.59521
Q6P6B1	Glutamate-rich protein 5 OS=Homo sapiens GN=ERICH5 PE=2 SV=1 - [ERIC5_HUMAN]	15.7543	24.33	5	6	72.5586	43.85	11	19	52.5996	51.6	12	19	66.8082	40.37	12	16	374	39.9115	4.48779
Q96C19	EF-hand domain-containing protein D2 OS=Homo sapiens GN=EFHD2 PE=1 SV=1 - [EFHD2_HUMAN]	29.2752	57.08	9	12	25.352	27.5	6	7	40.3846	67.08	14	19	35.2678	36.67	9	12	240	26.6805	5.19873
B4E1X7	cDNA FLJ55292, highly similar to Homo sapiens nuclear domain 10 protein (NDP52), mRNA OS=Homo sapiens PE=2 SV=1 - [B4E1X7_HUMAN]	26.6626	22.99	8	11	52.2974	33.33	9	14	48.3591	38.79	11	19	44.9017	30.17	8	11	348	40.5437	4.76709
P78371	T-complex protein 1 subunit beta OS=Homo sapiens GN=CCT2 PE=1 SV=4 - [TCPB_HUMAN]	22.185	17.94	6	8	48.741	28.41	11	14	47.8907	30.65	11	19	36.0408	25.05	10	11	535	57.4521	6.45557
Q99832-3	Isoform 3 of T-complex protein 1 subunit eta OS=Homo sapiens GN=CCT7 - [TCPH_HUMAN]	26.2311	23.05	10	11	49.9818	22.44	10	15	51.1836	35.07	14	19	29.5508	15.03	7	9	499	54.7695	7.6792
Q13268	Dehydrogenase/reductase SDR family member 2, mitochondrial OS=Homo sapiens GN=DHRS2 PE=1 SV=4 - [DHRS2_HUMAN]	27.5493	19.29	5	10	25.6358	15.71	4	7	50.0563	41.07	9	19	32.4295	24.64	5	9	280	29.9077	9.01221
B4DLR3	cDNA FLJ54020, highly similar to Heterogeneous nuclear ribonucleoprotein U OS=Homo sapiens PE=2 SV=1 - [B4DLR3_HUMAN]	22.6663	11.22	4	8	29.7794	7.91	3	7	49.4439	18.88	8	19	23.6401	8.42	3	8	784	86.8064	6.43018
P60660-2	Isoform Smooth muscle of Myosin light polypeptide 6 OS=Homo sapiens GN=MYL6 - [MYL6_HUMAN]	31.333	49.01	7	12	165.173	49.01	9	52	40.7732	54.3	7	18	176.96	88.08	13	56	151	16.9501	4.55127
G3V1V0	Myosin light polypeptide 6 OS=Homo sapiens GN=MYL6 PE=1 SV=1 - [G3V1V0_HUMAN]	31.333	45.96	7	12	165.173	45.96	9	52	40.7732	50.93	7	18	179.401	82.61	13	56	161	18.0255	4.76709
Q9NQX4	Unconventional myosin-Vc OS=Homo sapiens GN=MYO5C PE=1 SV=2 - [MYO5C_HUMAN]	27.5573	8.84	12	13	75.8737	12.51	18	25	41.4904	10.91	15	18	70.9386	14.64	21	24	1742	202.682	7.7085
A0A087WY00	Unconventional myosin-Va OS=Homo sapiens GN=MYO5A PE=1 SV=1 - [A0A087WY00_HUMAN]	21.0877	5.47	8	8	61.7419	12.8	18	20	42.0928	9.19	15	18	68.7363	11.98	17	21	1828	212.067	8.63135
Q27J81-2	Isoform 2 of Inverted formin-2 OS=Homo sapiens GN=INF2 - [INF2_HUMAN]	29.3462	13.87	10	11	68.4024	14.6	11	17	49.6485	18.15	15	18	51.8065	14.76	12	14	1240	134.533	5.52881
Q59EM9	Ubiquitin C variant (Fragment) OS=Homo sapiens PE=2 SV=1 - [Q59EM9_HUMAN]	29.1817	71.43	6	12	70.1783	51.95	4	22	46.4471	51.95	4	18	36.2809	51.95	4	12	1309	147.245	7.89893
H0Y4R1	Inosine-5'-monophosphate dehydrogenase 2 (Fragment) OS=Homo sapiens GN=IMPDH2 PE=1 SV=1 - [H0Y4R1_HUMAN]	20.8343	24.26	9	9	25.4269	15.74	7	8	48.8235	35.96	14	18	41.4739	34.89	11	12	470	51.0352	8.17725
Q9Y230	RuvB-like 2 OS=Homo sapiens GN=RUVBL2 PE=1 SV=3 - [RUVB2_HUMAN]	23.6832	26.35	9	9	28.4192	18.14	8	9	46.0455	40.6	14	18	25.771	19.01	8	8	463	51.1246	5.64307
P98175-4	Isoform 4 of RNA-binding protein 10 OS=Homo sapiens GN=RBM10 - [RBM10_HUMAN]									40.7898	16.55	9	18					852	94.3122	6.72705
Q9P0K7-3	Isoform 3 of Ankycorbin OS=Homo sapiens GN=RAI14 - [RAI14_HUMAN]	24.4752	16.36	12	12	92.438	25.82	19	27	39.9405	22.02	16	17	86.2015	27.26	20	25	972	109.013	6.02393
Q02952	A-kinase anchor protein 12 OS=Homo sapiens GN=AKAP12 PE=1 SV=4 - [AKA12_HUMAN]	18.7894	6.79	6	7	84.9371	17.85	17	25	44.3323	15.26	15	17	81.2022	19.36	21	25	1782	191.367	4.41162
O15231-3	Isoform 3 of Zinc finger protein 185 OS=Homo sapiens GN=ZNF185 - [ZN185_HUMAN]	15.3064	21.88	8	8	73.8323	36.81	18	25	35.6583	32.46	14	17	53.9172	36.38	13	20	690	73.5672	7.00537
Q9Y2D5	A-kinase anchor protein 2 OS=Homo sapiens GN=AKAP2 PE=1 SV=3 - [AKAP2_HUMAN]	20.8922	12.81	5	8	78.7768	16.65	9	19	50.657	26.89	12	17	67.5687	25.15	10	17	859	94.6028	5.10986
P06733	Alpha-enolase OS=Homo sapiens GN=ENO1 PE=1 SV=2 - [ENOA_HUMAN]	35.8168	31.8	10	14	29.201	21.66	8	8	37.4516	40.55	13	17	57.7263	36.87	12	16	434	47.1393	7.38623
Q04695	Keratin, type I cytoskeletal 17 OS=Homo sapiens GN=KRT17 PE=1 SV=2 - [K1C17_HUMAN]	80.5587	35.42	19	34	22.9681	14.58	7	8	40.7137	22.45	10	17	36.5014	21.76	9	12	432	48.076	5.021
B4DP54	cDNA FLJ52712, highly similar to Tubulin beta-6 chain OS=Homo sapiens PE=2 SV=1 - [B4DP54_HUMAN]	24.792	11.96	5	11	32.3121	13.88	5	12	39.4147	21.77	8	17	32.0134	18.42	8	12	418	46.6715	4.89404
	>sp|ALBU_BOVIN|	41.5826	17.96	12	16	11.6204	7.08	4	4	42.1893	15.98	11	17	12.9557	8.07	5	5	607	69.2484	6.17627
P62805	Histone H4 OS=Homo sapiens GN=HIST1H4A PE=1 SV=2 - [H4_HUMAN]	23.334	51.46	6	10					42.3707	56.31	8	17	12.538	41.75	4	4	103	11.3604	11.356
A8K9J7	Histone H2B OS=Homo sapiens PE=2 SV=1 - [A8K9J7_HUMAN]	15.9345	40.48	5	7					36.4583	43.65	7	17	3.53177	12.7	2	2	126	13.9876	10.3159
Q5D862	Filaggrin-2 OS=Homo sapiens GN=FLG2 PE=1 SV=1 - [FILA2_HUMAN]	50.2877	8.41	9	19	8.97503	2.17	3	3	42.9249	8.41	9	17					2391	247.928	8.30908
Q6UN15	Pre-mRNA 3'-end-processing factor FIP1 OS=Homo sapiens GN=FIP1L1 PE=1 SV=1 - [FIP1_HUMAN]	6.1849	5.56	2	2					34.9469	28.79	11	17					594	66.4865	5.59229
K7EKI8	Periplakin OS=Homo sapiens GN=PPL PE=1 SV=1 - [K7EKI8_HUMAN]	22.2036	6.96	10	11	76.0084	15.28	21	22	35.2478	11.4	15	16	108.208	21.09	29	33	1754	204.366	5.61768
A0A024R8L8	Envoplakin, isoform CRA_a OS=Homo sapiens GN=EVPL PE=4 SV=1 - [A0A024R8L8_HUMAN]	26.0734	6.3	9	11	131.107	19.43	35	42	41.3162	10.77	16	16	104.321	16.87	28	32	2033	231.491	7.02002
A8K556	cDNA FLJ78217 OS=Homo sapiens PE=2 SV=1 - [A8K556_HUMAN]	17.1381	18.77	4	13	28.865	14.85	2	17	21.8756	13.73	3	16	48.639	24.37	7	26	357	40.2589	8.14795
Q5M775	Cytospin-B OS=Homo sapiens GN=SPECC1 PE=1 SV=1 - [CYTSB_HUMAN]	19.0798	8.33	5	7	67.434	20.97	14	20	37.2424	13.2	13	16	67.159	21.54	18	20	1068	118.512	6.69775
B4E2K2	cDNA FLJ55665, highly similar to A-kinase anchor protein 2 OS=Homo sapiens PE=2 SV=1 - [B4E2K2_HUMAN]	20.8922	11.68	5	8	78.7768	15.18	9	19	46.5581	20.91	11	16	68.2974	23.04	10	17	942	103.479	5.07178
P63104	14-3-3 protein zeta/delta OS=Homo sapiens GN=YWHAZ PE=1 SV=1 - [1433Z_HUMAN]	16.1346	24.08	5	6	36.5072	35.92	7	16	36.0001	45.71	9	16	45.086	26.53	6	13	245	27.7277	4.79248
Q04637-7	Isoform 7 of Eukaryotic translation initiation factor 4 gamma 1 OS=Homo sapiens GN=EIF4G1 - [IF4G1_HUMAN]	10.9797	4.42	4	4	45.5465	11.68	10	18	23.9441	8.48	7	16	39.4196	9.47	7	12	1404	154.837	5.16064
Q13200	26S proteasome non-ATPase regulatory subunit 2 OS=Homo sapiens GN=PSMD2 PE=1 SV=3 - [PSMD2_HUMAN]	7.52416	5.95	3	3	39.327	12.89	10	15	29.6598	15.53	10	16	37.8858	11.34	9	12	908	100.136	5.19873
P13010	X-ray repair cross-complementing protein 5 OS=Homo sapiens GN=XRCC5 PE=1 SV=3 - [XRCC5_HUMAN]	16.2144	10.11	7	8	7.01283	4.37	2	2	34.0239	23.22	12	16	19.6465	12.02	6	7	732	82.6523	5.80811
B2R6J2	cDNA, FLJ92973, highly similar to Homo sapiens villin 2 (ezrin) (VIL2), mRNA OS=Homo sapiens PE=2 SV=1 - [B2R6J2_HUMAN]	18.3173	12.46	6	7	24.5963	16.72	8	9	32.9748	27.3	14	16	23.6202	11.95	6	7	586	69.3577	6.26514
A8K690	cDNA FLJ76863, highly similar to Homo sapiens stress-induced-phosphoprotein 1 (Hsp70/Hsp90-organizing protein) (STIP1), mRNA OS=Homo sapiens PE=2 SV=1 - [A8K690_HUMAN]	10.4571	9.02	5	5	15.6732	12.89	5	6	35.7289	22.65	10	16	12.8356	12.34	5	5	543	62.6154	6.80029
Q07157	Tight junction protein ZO-1 OS=Homo sapiens GN=TJP1 PE=1 SV=3 - [ZO1_HUMAN]	20.6667	9.27	9	9	79.0055	16.99	19	28	28.4758	13.04	14	15	96.1517	22.2	25	28	1748	195.34	6.69775
Q9ULV0	Unconventional myosin-Vb OS=Homo sapiens GN=MYO5B PE=1 SV=3 - [MYO5B_HUMAN]	26.0817	8.17	11	11	86.4751	11.42	20	26	40.198	9.96	14	15	77.1264	11.85	19	22	1848	213.538	7.1958
Q6FG43	FLOT2 protein OS=Homo sapiens GN=FLOT2 PE=2 SV=1 - [Q6FG43_HUMAN]	20.328	24.01	8	8	43.3304	31.93	11	16	38.6192	34.3	12	15	69.9129	45.65	15	21	379	41.6592	5.2876
B2RDK6	cDNA, FLJ96656, highly similar to Homo sapiens SPFH domain family, member 1 (SPFH1), mRNA OS=Homo sapiens PE=2 SV=1 - [B2RDK6_HUMAN]	20.1432	25.43	8	9	70.4853	28.9	10	22	34.4721	31.21	11	15	56.1532	29.19	11	18	346	38.8873	7.86963
A8K379	Non-specific protein-tyrosine kinase OS=Homo sapiens PE=2 SV=1 - [A8K379_HUMAN]	16.9128	16.21	7	9	30.5985	19.92	10	10	30.5807	25.98	13	15	52.6545	25	11	16	512	58.5818	6.87354
Q32MZ4-3	Isoform 3 of Leucine-rich repeat flightless-interacting protein 1 OS=Homo sapiens GN=LRRFIP1 - [LRRF1_HUMAN]	9.60057	9.97	3	6	27.1674	10.24	4	7	33.8027	14.23	6	15	42.8471	16.49	6	12	752	82.6386	4.61475
Q96KK5	Histone H2A type 1-H OS=Homo sapiens GN=HIST1H2AH PE=1 SV=3 - [H2A1H_HUMAN]	16.5092	27.34	3	7	24.1817	21.88	2	7	28.9575	35.94	4	15	19.8866	21.88	2	6	128	13.8978	10.8872
P17987	T-complex protein 1 subunit alpha OS=Homo sapiens GN=TCP1 PE=1 SV=1 - [TCPA_HUMAN]	29.3548	23.56	10	12	65.5781	25.18	11	19	38.2149	27.16	12	14	57.8676	23.92	10	17	556	60.3056	6.11279
P07948-2	Isoform 2 of Tyrosine-protein kinase Lyn OS=Homo sapiens GN=LYN - [LYN_HUMAN]	13.7261	13.85	6	8	31.5541	20.57	10	11	27.6735	24.03	12	14	55.2776	28.92	12	17	491	55.9975	6.49365
D6RD46	LIM and calponin homology domains-containing protein 1 OS=Homo sapiens GN=LIMCH1 PE=1 SV=1 - [D6RD46_HUMAN]	31.8869	16.33	11	12	49.2025	21.63	14	15	36.3567	17.55	12	14	48.854	18.78	13	15	980	109.867	6.46826
H7C3G6	Myosin phosphatase Rho-interacting protein (Fragment) OS=Homo sapiens GN=MPRIP PE=1 SV=2 - [H7C3G6_HUMAN]	26.0177	34.3	9	11	59.4277	39.71	9	18	29.0712	36.1	9	14	52.5879	46.57	11	15	277	32.1925	6.7124
Q14677-3	Isoform 3 of Clathrin interactor 1 OS=Homo sapiens GN=CLINT1 - [EPN4_HUMAN]	5.00066	6.84	2	2	22.0006	12.75	6	6	30.3263	20.37	9	14	37.3208	20.22	8	11	643	70.2499	6.58057
B4DKV4	cDNA FLJ60647, highly similar to Keratin, type II cytoskeletal 6B OS=Homo sapiens PE=2 SV=1 - [B4DKV4_HUMAN]	88.1775	40.3	19	38	26.8193	15.78	8	9	36.7421	28.33	12	14	30.3266	18.63	8	10	526	55.6981	8.42627
B4DTS3	cDNA FLJ50213, highly similar to Calpain-6 (Calpamodulin) OS=Homo sapiens PE=2 SV=1 - [B4DTS3_HUMAN]	10.0555	13.99	5	5	8.89338	9.84	3	3	32.4409	28.76	11	14	24.6794	25.39	8	10	386	45.038	8.74854
P13667	Protein disulfide-isomerase A4 OS=Homo sapiens GN=PDIA4 PE=1 SV=2 - [PDIA4_HUMAN]	14.3798	11.32	5	8	18.6755	11.16	5	8	25.9918	22.02	10	14	19.0249	15.04	6	7	645	72.887	5.07178
B1ANR0	Poly(A) binding protein, cytoplasmic 4 (Inducible form), isoform CRA_e OS=Homo sapiens GN=PABPC4 PE=4 SV=1 - [B1ANR0_HUMAN]	11.2152	6.5	3	4	13.6056	6.02	3	4	35.8171	19.19	10	14	25.9487	6.99	4	7	615	67.9279	9.45166
P04908	Histone H2A type 1-B/E OS=Homo sapiens GN=HIST1H2AB PE=1 SV=2 - [H2A1B_HUMAN]	19.2882	35.38	4	8	24.1817	21.54	2	7	28.6713	35.38	4	14	19.8866	21.54	2	6	130	14.127	11.0483
B4DN41	cDNA FLJ53366, highly similar to Probable ATP-dependent RNA helicase DDX5 (EC 3.6.1.-) OS=Homo sapiens PE=2 SV=1 - [B4DN41_HUMAN]	9.97912	10.45	4	6	20.1559	12.27	5	8	18.7009	18.91	7	14	16.7762	15.75	5	6	603	67.72	8.86572
O75533	Splicing factor 3B subunit 1 OS=Homo sapiens GN=SF3B1 PE=1 SV=3 - [SF3B1_HUMAN]	5.10471	3.3	2	2					36.6094	15.18	13	14	12.0402	4.68	3	4	1304	145.738	7.09326
Q6YHK3	CD109 antigen OS=Homo sapiens GN=CD109 PE=1 SV=2 - [CD109_HUMAN]	10.0594	4.15	4	4	79.424	14.12	16	23	29.5539	10.59	11	13	98.2314	17.79	20	28	1445	161.587	5.84619
B2R6K4	cDNA, FLJ92996, highly similar to Homo sapiens guanine nucleotide binding protein (G protein), beta polypeptide 1 (GNB1), mRNA OS=Homo sapiens PE=2 SV=1 - [B2R6K4_HUMAN]	32.1833	42.06	9	12	45.3042	22.06	6	11	31.8732	41.76	11	13	58.1583	42.06	9	19	340	37.277	6.17627
P78527-2	Isoform 2 of DNA-dependent protein kinase catalytic subunit OS=Homo sapiens GN=PRKDC - [PRKDC_HUMAN]	24.7696	4.64	11	11	63.0265	5.81	19	19	29.6591	4.64	13	13	56.1166	5.69	19	19	4097	465.202	7.1665
B3KMX3	cDNA FLJ12857 fis, clone NT2RP2003513, highly similar to Homo sapiens paralemmin (PALM), transcript variant 2, mRNA OS=Homo sapiens PE=2 SV=1 - [B3KMX3_HUMAN]	7.379	21.11	3	3	56.5462	37.78	7	15	34.0084	37.78	9	13	51.9949	55.19	7	15	270	28.471	4.729
P08582	Melanotransferrin OS=Homo sapiens GN=MFI2 PE=1 SV=2 - [TRFM_HUMAN]	30.5614	20.73	11	12	50.6784	21.54	12	14	36.6622	22.9	12	13	49.9837	20.6	11	14	738	80.1633	5.93506
A8K4Z4	cDNA FLJ75549, highly similar to Homo sapiens ribosomal protein, large, P0 (RPLP0), transcript variant 1, mRNA OS=Homo sapiens PE=2 SV=1 - [A8K4Z4_HUMAN]	25.9439	32.49	7	9	44.5515	39.43	8	13	37.1173	43.85	11	13	36.5792	48.58	10	11	317	34.2178	5.97314
A1A4E9	Keratin 13 OS=Homo sapiens GN=KRT13 PE=2 SV=1 - [A1A4E9_HUMAN]	80.1996	41.7	18	34	25.7671	12.66	6	9	30.9912	12.66	7	13	30.4837	12.23	6	10	458	49.5554	4.95752
P12004	Proliferating cell nuclear antigen OS=Homo sapiens GN=PCNA PE=1 SV=1 - [PCNA_HUMAN]									26.7593	40.23	7	13	29.8975	43.68	7	10	261	28.7503	4.69092
P62879	Guanine nucleotide-binding protein G(I)/G(S)/G(T) subunit beta-2 OS=Homo sapiens GN=GNB2 PE=1 SV=3 - [GBB2_HUMAN]	23.0836	35	7	9	33.0612	18.82	5	8	34.619	37.06	9	13	31.5155	22.35	6	8	340	37.3071	5.99854
P12956	X-ray repair cross-complementing protein 6 OS=Homo sapiens GN=XRCC6 PE=1 SV=2 - [XRCC6_HUMAN]	17.4226	13.63	6	8	31.322	19.87	9	10	30.5776	20.2	9	13	28.0901	13.79	5	8	609	69.7991	6.63916
P42224	Signal transducer and activator of transcription 1-alpha/beta OS=Homo sapiens GN=STAT1 PE=1 SV=2 - [STAT1_HUMAN]	11.7615	7.07	4	4	21.1018	11.47	6	7	34.0786	20.53	12	13	17.7942	12.4	8	8	750	87.2795	6.04932
P27816-6	Isoform 6 of Microtubule-associated protein 4 OS=Homo sapiens GN=MAP4 - [MAP4_HUMAN]	8.60692	4.23	3	3	45.7769	14.98	11	12	29.0762	20.44	12	13	26.465	11.89	8	8	1135	119.884	6.22705
P62424	60S ribosomal protein L7a OS=Homo sapiens GN=RPL7A PE=1 SV=2 - [RL7A_HUMAN]	23.3191	39.85	10	11	19.898	23.31	6	7	25.3901	42.86	12	13	5.88811	9.4	2	2	266	29.977	10.6089
Q4W5T8	Putative uncharacterized protein PKP4 (Fragment) OS=Homo sapiens GN=PKP4 PE=4 SV=1 - [Q4W5T8_HUMAN]	12.9872	7.93	6	6	40.6377	13.34	9	14	28.6684	17.44	12	12	63.9177	22.49	14	18	1147	127.138	9.20264
B2RCL4	cDNA, FLJ96143, highly similar to Homo sapiens paralemmin (PALM), mRNA OS=Homo sapiens PE=2 SV=1 - [B2RCL4_HUMAN]	12.953	22.22	5	5	49.9329	24.81	6	13	33.2225	29.72	8	12	55.5188	41.09	8	16	387	42.0341	4.99561
P68104	Elongation factor 1-alpha 1 OS=Homo sapiens GN=EEF1A1 PE=1 SV=1 - [EF1A1_HUMAN]	39.9481	18.83	5	14	87.3872	17.75	5	20	27.4818	24.03	7	12	55.4163	26.41	8	15	462	50.1091	9.01221
P40939	Trifunctional enzyme subunit alpha, mitochondrial OS=Homo sapiens GN=HADHA PE=1 SV=2 - [ECHA_HUMAN]	11.8747	12.06	6	7	44.5277	11.01	6	12	32.1306	16.25	9	12	47.3324	22.02	10	13	763	82.9469	9.0415
A8K3C3	T-complex protein 1 subunit delta OS=Homo sapiens PE=2 SV=1 - [A8K3C3_HUMAN]	9.65862	12.06	3	4	45.0545	20.22	8	12	32.54	20.04	8	12	38.1528	23.01	10	13	539	57.9158	7.82568
Q5CZB5	Putative uncharacterized protein DKFZp686M0430 OS=Homo sapiens GN=DKFZp686M0430 PE=2 SV=1 - [Q5CZB5_HUMAN]	11.73	6.05	4	4	52.0064	14.52	10	14	36.337	15.38	10	12	41.7684	12.45	9	13	1157	125.01	4.48779
Q9Y446	Plakophilin-3 OS=Homo sapiens GN=PKP3 PE=1 SV=1 - [PKP3_HUMAN]	23.4007	12.8	8	8	34.6396	12.17	8	10	29.5576	19.2	12	12	46.4979	19.32	10	12	797	87.029	9.31982
P42167	Lamina-associated polypeptide 2, isoforms beta/gamma OS=Homo sapiens GN=TMPO PE=1 SV=2 - [LAP2B_HUMAN]	21.5217	26.21	7	7	31.9273	22.47	7	8	32.2513	29.52	9	12	39.9428	40.97	11	12	454	50.6395	9.37842
B4DNW7	Adenylyl cyclase-associated protein OS=Homo sapiens PE=2 SV=1 - [B4DNW7_HUMAN]	8.96459	18.94	3	3	17.0673	16.17	3	4	34.6255	41.8	10	12	29.9905	28.87	5	8	433	47.3605	8.22119
Q13428-3	Isoform 3 of Treacle protein OS=Homo sapiens GN=TCOF1 - [TCOF_HUMAN]	13.8902	6.92	7	7	40.5157	9.54	10	11	27.6841	10.41	10	12	20.1399	4.37	5	7	1489	152.114	9.0415
P23396	40S ribosomal protein S3 OS=Homo sapiens GN=RPS3 PE=1 SV=2 - [RS3_HUMAN]	12.4074	35.39	7	7	12.333	15.64	3	4	26.9359	49.79	10	12	14.9127	30.45	5	5	243	26.6714	9.65674
P62258	14-3-3 protein epsilon OS=Homo sapiens GN=YWHAE PE=1 SV=1 - [1433E_HUMAN]	5.19913	9.41	2	2	19.4065	23.92	5	6	28.1205	39.61	7	12	13.0554	20.39	4	4	255	29.1554	4.7417
B4DSD8	Alpha-1,4 glucan phosphorylase OS=Homo sapiens PE=2 SV=1 - [B4DSD8_HUMAN]	6.18507	3.72	3	3					23.0314	7.45	5	12					752	85.7328	6.16357
H3BPE1	Microtubule-actin cross-linking factor 1, isoforms 1/2/3/5 OS=Homo sapiens GN=MACF1 PE=1 SV=1 - [H3BPE1_HUMAN]	4.69341	0.33	2	2	95.8623	5.1	25	29	25.0686	1.89	11	11	83.3815	4.51	24	25	7555	856.346	5.38916
Q96II8	Leucine-rich repeat and calponin homology domain-containing protein 3 OS=Homo sapiens GN=LRCH3 PE=1 SV=2 - [LRCH3_HUMAN]	14.4629	10.55	6	8	61.0702	13	8	16	24.713	19.82	9	11	75.7334	23.29	12	21	777	86.03	6.7124
Q86W92-3	Isoform 3 of Liprin-beta-1 OS=Homo sapiens GN=PPFIBP1 - [LIPB1_HUMAN]	13.7385	7.81	4	7	51.503	12.12	8	14	21.5379	15.73	9	11	61.0598	18.18	12	18	858	96.9042	6.53662
P38606-2	Isoform 2 of V-type proton ATPase catalytic subunit A OS=Homo sapiens GN=ATP6V1A - [VATA_HUMAN]	20.1268	13.7	5	7	20.3504	9.59	4	6	32.4284	20.03	8	11	45.982	26.37	10	13	584	64.6948	5.65576
Q59ET3	Chaperonin containing TCP1, subunit 6A isoform a variant (Fragment) OS=Homo sapiens PE=2 SV=1 - [Q59ET3_HUMAN]	21.8528	18.15	7	9	37.3882	24.01	10	11	30.5763	25.33	10	11	42.7515	27.6	10	12	529	57.7255	6.66846
P12931	Proto-oncogene tyrosine-protein kinase Src OS=Homo sapiens GN=SRC PE=1 SV=3 - [SRC_HUMAN]	17.2095	15.49	7	9	33.1602	17.16	8	11	27.8928	17.54	9	11	32.8073	15.11	9	11	536	59.797	7.41553
P04083	Annexin A1 OS=Homo sapiens GN=ANXA1 PE=1 SV=2 - [ANXA1_HUMAN]	18.8606	27.46	6	7	18.3337	15.61	4	4	28.6015	29.77	7	11	38.8795	38.15	9	10	346	38.69	7.02002
Q13501	Sequestosome-1 OS=Homo sapiens GN=SQSTM1 PE=1 SV=1 - [SQSTM_HUMAN]	15.1021	17.73	5	6	52.3936	30.23	7	13	26.4529	32.95	8	11	38.5107	27.73	7	10	440	47.6569	5.22412
B4DNL5	Protein disulfide-isomerase OS=Homo sapiens PE=2 SV=1 - [B4DNL5_HUMAN]	33.2829	26.02	10	13	33.4657	14.23	7	10	25.2985	19.72	8	11	26.7638	17.89	6	9	492	55.3466	4.79248
P61158	Actin-related protein 3 OS=Homo sapiens GN=ACTR3 PE=1 SV=3 - [ARP3_HUMAN]	23.2382	25.6	8	10	26.2755	24.16	8	9	21.4753	26.79	8	11	30.1177	28.71	8	9	418	47.341	5.88428
P63092-2	Isoform Gnas-2 of Guanine nucleotide-binding protein G(s) subunit alpha isoforms short OS=Homo sapiens GN=GNAS - [GNAS2_HUMAN]	13.6211	18.95	7	7	18.7401	16.32	6	6	25.1162	17.89	7	11	27.4483	22.89	8	9	380	44.2383	6.29053
P36957	Dihydrolipoyllysine-residue succinyltransferase component of 2-oxoglutarate dehydrogenase complex, mitochondrial OS=Homo sapiens GN=DLST PE=1 SV=4 - [ODO2_HUMAN]	13.2948	16.34	6	7	15.0201	9.05	4	5	28.0401	20.75	9	11	23.6254	11.7	6	8	453	48.7245	8.95361
Q6ZMU5	Tripartite motif-containing protein 72 OS=Homo sapiens GN=TRIM72 PE=1 SV=2 - [TRI72_HUMAN]	12.8237	13.21	4	5	9.62664	13.42	3	3	28.3823	24.95	8	11	26.7481	19.92	5	8	477	52.697	6.48096
P26641	Elongation factor 1-gamma OS=Homo sapiens GN=EEF1G PE=1 SV=3 - [EF1G_HUMAN]	13.8391	13.96	5	7	27.5139	11.44	4	7	28.8773	16.02	6	11	25.3816	13.73	5	7	437	50.0871	6.66846
P27694	Replication protein A 70 kDa DNA-binding subunit OS=Homo sapiens GN=RPA1 PE=1 SV=2 - [RFA1_HUMAN]	12.6766	11.2	4	5					20.568	27.11	9	11	23.0529	13.8	5	7	616	68.0953	7.21045
P31946-2	Isoform Short of 14-3-3 protein beta/alpha OS=Homo sapiens GN=YWHAB - [1433B_HUMAN]	5.00813	18.03	2	2	15.5744	23.77	5	5	24.3176	31.97	8	11	16.8751	23.77	4	7	244	27.8327	4.83057
P61160	Actin-related protein 2 OS=Homo sapiens GN=ACTR2 PE=1 SV=1 - [ARP2_HUMAN]	30.7312	14.97	4	10	9.12292	6.35	3	3	30.756	28.17	9	11	24.9831	20.05	5	6	394	44.7322	6.7417
Q14644	Ras GTPase-activating protein 3 OS=Homo sapiens GN=RASA3 PE=1 SV=3 - [RASA3_HUMAN]	12.844	10.55	7	7	13.6931	7.79	5	5	24.0369	12.35	9	11	15.6731	9.83	6	6	834	95.6382	7.15186
Q14676-2	Isoform 2 of Mediator of DNA damage checkpoint protein 1 OS=Homo sapiens GN=MDC1 - [MDC1_HUMAN]	5.98545	4.88	3	3	27.9687	7.67	5	8	27.8456	15.12	11	11	14.7388	7.23	5	6	1825	197.478	5.69385
P62906	60S ribosomal protein L10a OS=Homo sapiens GN=RPL10A PE=1 SV=2 - [RL10A_HUMAN]	13.5869	17.05	4	5					23.1355	28.11	7	11	9.97962	17.05	3	3	217	24.8155	9.93506
P13639	Elongation factor 2 OS=Homo sapiens GN=EEF2 PE=1 SV=4 - [EF2_HUMAN]	10.0144	5.71	4	4	22.6307	11.66	9	9	25.0188	14.1	10	11	9.61596	4.78	3	3	858	95.277	6.82959
Q6PKG0	La-related protein 1 OS=Homo sapiens GN=LARP1 PE=1 SV=2 - [LARP1_HUMAN]					9.10357	4.29	3	3	28.9761	21.26	11	11	9.78332	4.29	3	3	1096	123.434	8.82178
Q08211	ATP-dependent RNA helicase A OS=Homo sapiens GN=DHX9 PE=1 SV=4 - [DHX9_HUMAN]	11.3917	5.2	5	5	14.4131	3.62	3	4	25.4209	9.45	9	11					1270	140.869	6.84424
Q9C0C2	182 kDa tankyrase-1-binding protein OS=Homo sapiens GN=TNKS1BP1 PE=1 SV=4 - [TB182_HUMAN]	4.98353	1.68	2	2	66.2593	17.24	16	18	26.1527	8.1	9	10	76.6418	18.33	20	26	1729	181.685	4.85596
Q53HL1	Myosin regulatory light chain MRCL3 variant (Fragment) OS=Homo sapiens PE=2 SV=1 - [Q53HL1_HUMAN]	7.56269	12.28	2	4	65.8585	40.35	7	21	23.5037	40.35	5	10	77.4293	60.82	10	25	171	19.7805	4.84326
Q14203-3	Isoform 3 of Dynactin subunit 1 OS=Homo sapiens GN=DCTN1 - [DCTN1_HUMAN]	5.67003	3.64	3	3	32.6126	10.68	10	11	25.6889	9.47	9	10	39.9929	9.39	9	16	1236	136.735	5.40186
A0A087X054	Hypoxia up-regulated protein 1 OS=Homo sapiens GN=HYOU1 PE=1 SV=1 - [A0A087X054_HUMAN]					23.6248	11.53	8	9	21.94	12.49	8	10	42.6482	19.96	12	13	937	104.713	5.71924
B3KX11	T-complex protein 1 subunit gamma OS=Homo sapiens PE=2 SV=1 - [B3KX11_HUMAN]	12.1662	11.3	4	5	22.6428	14.56	7	7	24.7121	22.99	9	10	38.487	25.86	9	11	522	57.909	6.93213
B4DUI2	cDNA FLJ61415, highly similar to Protein kinase C and casein kinase substratein neurons protein 3 OS=Homo sapiens PE=2 SV=1 - [B4DUI2_HUMAN]	22.4781	24.47	7	8	30.0048	23.52	8	8	24.7143	24.23	9	10	31.0641	22.33	8	9	421	48.2427	6.39209
P21281	V-type proton ATPase subunit B, brain isoform OS=Homo sapiens GN=ATP6V1B2 PE=1 SV=3 - [VATB2_HUMAN]	11.3402	13.11	4	5	31.1984	17.42	7	10	25.6001	15.46	5	10	28.0937	16.63	6	9	511	56.4649	5.80811
Q9NR30	Nucleolar RNA helicase 2 OS=Homo sapiens GN=DDX21 PE=1 SV=5 - [DDX21_HUMAN]	5.51103	4.73	3	3	20.0819	8.3	7	7	29.1241	15.45	10	10	28.0829	11.75	8	9	783	87.2904	9.27588
Q15046	Lysine--tRNA ligase OS=Homo sapiens GN=KARS PE=1 SV=3 - [SYK_HUMAN]	5.92918	4.52	2	2	30.1378	10.72	4	9	27.6419	19.43	7	10	25.6329	17.09	6	9	597	68.0046	6.354
Q5T6W5	Heterogeneous nuclear ribonucleoprotein K OS=Homo sapiens GN=HNRNPK PE=1 SV=1 - [Q5T6W5_HUMAN]	17.6476	15.42	5	6	26.1166	12.62	4	8	30.0414	23.13	7	10	29.9091	22.66	7	8	428	47.5276	5.63037
Q96RT1-7	Isoform 7 of Protein LAP2 OS=Homo sapiens GN=ERBB2IP - [LAP2_HUMAN]	4.97341	3.46	2	3	27.6509	9.37	6	10	26.403	12.75	8	10	26.8676	7.99	7	8	1302	145.996	5.2876
E9PCY7	Heterogeneous nuclear ribonucleoprotein H OS=Homo sapiens GN=HNRNPH1 PE=1 SV=1 - [E9PCY7_HUMAN]	24.0182	18.41	5	8	24.6454	16.55	4	6	29.3443	23.54	6	10	28.1593	22.61	5	7	429	47.0574	6.34131
P48643-2	Isoform 2 of T-complex protein 1 subunit epsilon OS=Homo sapiens GN=CCT5 - [TCPE_HUMAN]	17.0722	18.75	5	7	21.8835	19.2	6	8	20.7281	24.11	9	10	18.3878	12.72	5	7	448	49.4948	6.18896
Q92841	Probable ATP-dependent RNA helicase DDX17 OS=Homo sapiens GN=DDX17 PE=1 SV=2 - [DDX17_HUMAN]					25.8035	11.93	6	8	18.3302	17.83	9	10	19.9374	13.72	7	7	729	80.222	8.26514
B4DRU0	Eukaryotic translation initiation factor 3 subunit C OS=Homo sapiens GN=EIF3C PE=2 SV=1 - [B4DRU0_HUMAN]	4.94771	4.76	3	3	19.4423	8.03	5	6	21.7541	14.69	9	10	15.5847	8.3	5	6	735	84.9132	6.81494
B4DXZ6	Fragile X mental retardation syndrome-related protein 1 OS=Homo sapiens GN=FXR1 PE=2 SV=1 - [B4DXZ6_HUMAN]	7.45297	5.59	3	3					25.0674	21.05	10	10	17.1835	12.17	4	5	608	68.2852	6.04932
Q9Y6M1-1	Isoform 2 of Insulin-like growth factor 2 mRNA-binding protein 2 OS=Homo sapiens GN=IGF2BP2 - [IF2B2_HUMAN]					19.3372	14.21	6	6	26.176	23.38	9	10	13.5417	4.86	2	5	556	61.8043	8.25049
P14868	Aspartate--tRNA ligase, cytoplasmic OS=Homo sapiens GN=DARS PE=1 SV=2 - [SYDC_HUMAN]	18.3337	18.56	7	8	10.1688	8.78	4	4	21.0505	20.76	8	10	11.2281	11.58	4	4	501	57.1	6.55127
Q12906	Interleukin enhancer-binding factor 3 OS=Homo sapiens GN=ILF3 PE=1 SV=3 - [ILF3_HUMAN]	14.7894	12.53	6	7	22.3454	13.09	5	7	28.4911	18.68	9	10	12.7576	8.95	4	4	894	95.2791	8.76318
P22626	Heterogeneous nuclear ribonucleoproteins A2/B1 OS=Homo sapiens GN=HNRNPA2B1 PE=1 SV=2 - [ROA2_HUMAN]	7.55114	7.65	2	4	12.8452	11.33	2	3	28.0047	28.33	7	10	10.929	9.92	2	3	353	37.4067	8.95361
P55084-2	Isoform 2 of Trifunctional enzyme subunit beta, mitochondrial OS=Homo sapiens GN=HADHB - [ECHB_HUMAN]	9.55202	12.83	4	4	11.8222	9.07	4	4	22.2639	19.69	7	10	8.24101	7.08	3	3	452	48.8482	9.17334
B4DM78	cDNA FLJ58199, highly similar to Fragile X mental retardation syndrome-related protein 1 OS=Homo sapiens PE=2 SV=1 - [B4DM78_HUMAN]	4.75798	3.72	2	2					25.6844	23.19	10	10	8.92933	3.72	2	3	565	62.9945	6.771
P27348	14-3-3 protein theta OS=Homo sapiens GN=YWHAQ PE=1 SV=1 - [1433T_HUMAN]					19.5801	16.73	3	6	22.9308	27.35	8	10	10.6127	8.98	2	3	245	27.7468	4.77979
A0A087WZZ5	Splicing factor 3B subunit 2 OS=Homo sapiens GN=SF3B2 PE=1 SV=1 - [A0A087WZZ5_HUMAN]									19.8602	16.3	9	10	7.19246	3.9	2	2	871	97.5247	5.66846
P29508	Serpin B3 OS=Homo sapiens GN=SERPINB3 PE=1 SV=2 - [SPB3_HUMAN]	25.2518	25.38	7	10					17.482	21.03	7	10					390	44.5365	6.81494
P25705	ATP synthase subunit alpha, mitochondrial OS=Homo sapiens GN=ATP5A1 PE=1 SV=1 - [ATPA_HUMAN]	23.0069	16.09	7	8	39.6772	23.69	10	12	22.3368	16.09	7	9	47.4782	18.63	9	15	553	59.7136	9.12939
P34932	Heat shock 70 kDa protein 4 OS=Homo sapiens GN=HSPA4 PE=1 SV=4 - [HSP74_HUMAN]	5.94262	3.45	2	2	32.3712	22.02	10	10	21.7955	14.76	9	9	35.3751	21.07	11	15	840	94.2712	5.18604
P06241-3	Isoform 3 of Tyrosine-protein kinase Fyn OS=Homo sapiens GN=FYN - [FYN_HUMAN]	14.9086	10.17	6	6	11.0002	7.88	4	4	23.2626	9.34	5	9	30.7909	14.32	8	10	482	54.4791	6.22705
Q8N3E9	1-phosphatidylinositol 4,5-bisphosphate phosphodiesterase delta-3 OS=Homo sapiens GN=PLCD3 PE=1 SV=3 - [PLCD3_HUMAN]	8.67007	5.7	4	4	31.8029	17.24	9	12	19.0421	13.81	8	9	25.9105	14.45	7	9	789	89.2022	6.97607
Q02413	Desmoglein-1 OS=Homo sapiens GN=DSG1 PE=1 SV=2 - [DSG1_HUMAN]	50.8728	15.73	10	19					28.4303	10.3	6	9	29.6639	9.53	5	8	1049	113.676	5.03369
Q08380	Galectin-3-binding protein OS=Homo sapiens GN=LGALS3BP PE=1 SV=1 - [LG3BP_HUMAN]	12.4257	11.45	5	5	21.4525	11.28	4	6	18.8294	13.16	6	9	23.4393	13.85	6	8	585	65.2893	5.2749
A0A0A0MR02	Voltage-dependent anion-selective channel protein 2 (Fragment) OS=Homo sapiens GN=VDAC2 PE=4 SV=1 - [A0A0A0MR02_HUMAN]	11.6009	18.09	4	5	19.079	27.66	5	5	22.4183	32.27	8	9	19.4457	28.72	6	6	282	30.3289	7.81104
Q14257	Reticulocalbin-2 OS=Homo sapiens GN=RCN2 PE=1 SV=1 - [RCN2_HUMAN]	12.3447	13.56	3	4	16.0408	13.56	3	4	22.5894	27.44	6	9	25.9461	18.61	4	6	317	36.8536	4.39893
P49006	MARCKS-related protein OS=Homo sapiens GN=MARCKSL1 PE=1 SV=2 - [MRP_HUMAN]	5.36931	26.15	2	4	38.7853	54.87	4	12	25.5063	68.72	5	9	19.0993	54.36	3	5	195	19.5172	4.66553
P60174-1	Isoform 2 of Triosephosphate isomerase OS=Homo sapiens GN=TPI1 - [TPIS_HUMAN]	9.07539	18.47	3	3	5.4787	10.04	2	2	23.0451	44.58	7	9	16.1536	32.93	5	5	249	26.6527	6.90283
B3KQT9	Protein disulfide-isomerase OS=Homo sapiens PE=2 SV=1 - [B3KQT9_HUMAN]	8.78691	12.5	5	5	10.5235	9.58	4	4	23.302	22.5	9	9	13.1798	11.04	4	4	480	54.0685	7.21045
P06737-2	Isoform 2 of Glycogen phosphorylase, liver form OS=Homo sapiens GN=PYGL - [PYGL_HUMAN]	8.51448	5.04	4	4	18.2637	7.38	5	9	18.0698	9.23	7	9	8.16297	4.18	3	3	813	93.0751	7.29834
	>sp|ALBU_HUMAN|	35.3298	19.05	11	14	7.19685	3.61	2	2	23.8453	9.52	6	9	6.52546	3.61	2	2	609	69.3215	6.27783
	>SP|streptavidin|	32.5543	43.4	4	11					24.9596	43.4	4	9					159	16.4811	6.55127
Q5K634	SCCA2/SCCA1 fusion protein isoform 1 OS=Homo sapiens PE=2 SV=1 - [Q5K634_HUMAN]	21.94	21.79	6	9					16.5902	25.13	8	9					390	44.6205	6.39209
Q08188	Protein-glutamine gamma-glutamyltransferase E OS=Homo sapiens GN=TGM3 PE=1 SV=4 - [TGM3_HUMAN]	20.8171	14.43	7	8					20.5571	15.01	5	9					693	76.5836	5.85889
O43143	Putative pre-mRNA-splicing factor ATP-dependent RNA helicase DHX15 OS=Homo sapiens GN=DHX15 PE=1 SV=2 - [DHX15_HUMAN]	4.295	4.28	3	3					18.9955	13.08	8	9					795	90.8752	7.45947
P55884	Eukaryotic translation initiation factor 3 subunit B OS=Homo sapiens GN=EIF3B PE=1 SV=3 - [EIF3B_HUMAN]	5.0057	3.32	2	2	12.0096	8.23	4	5	27.9788	15.6	7	9					814	92.4238	4.99561
A6NLN1	Polypyrimidine tract binding protein 1, isoform CRA_b OS=Homo sapiens GN=PTBP1 PE=4 SV=4 - [A6NLN1_HUMAN]	4.35696	4.36	2	2	10.0414	7.97	3	3	19.6911	15.37	6	9					527	56.4753	9.37842
P62158	Calmodulin OS=Homo sapiens GN=CALM1 PE=1 SV=2 - [CALM_HUMAN]	11.2216	22.15	2	4	156.757	69.13	7	48	20.213	45.64	4	8	127.973	73.83	8	41	149	16.8268	4.22119
Q9UHD8-7	Isoform 7 of Septin-9 OS=Homo sapiens GN=SEPT9 - [SEPT9_HUMAN]	4.85039	3.35	2	2	14.9225	10.41	5	5	21.1408	21.52	8	8	49.0012	29.45	9	17	567	63.4628	8.66064
A0A087WVV2	Ribosome-binding protein 1 OS=Homo sapiens GN=RRBP1 PE=1 SV=1 - [A0A087WVV2_HUMAN]					57.5132	21.63	13	16	26.1233	14.13	7	8	44.8587	18.42	10	13	934	102.713	5.33838
Q9H3U1-2	Isoform 2 of Protein unc-45 homolog A OS=Homo sapiens GN=UNC45A - [UN45A_HUMAN]	14.8118	6.89	5	7	47.2206	13.35	10	14	19.0041	8.5	7	8	38.7923	12.92	9	12	929	101.611	6.06201
P26232-3	Isoform 3 of Catenin alpha-2 OS=Homo sapiens GN=CTNNA2 - [CTNA2_HUMAN]	9.1829	5.12	4	4	47.4715	9.65	7	13	19.6788	7.33	6	8	44.4261	7.91	5	12	860	95.4982	5.88428
P22314-2	Isoform 2 of Ubiquitin-like modifier-activating enzyme 1 OS=Homo sapiens GN=UBA1 - [UBA1_HUMAN]	19.741	8.35	5	7	32.0546	11.2	9	9	22.355	9.72	6	8	37.1915	12.48	9	10	1018	113.728	5.60498
Q6NYC8	Phostensin OS=Homo sapiens GN=PPP1R18 PE=1 SV=1 - [PPR18_HUMAN]	10.3453	14.52	5	6	30.9756	20.39	7	11	13.8814	15.5	5	8	36.166	19.25	7	10	613	67.9015	5.40186
Q14651	Plastin-1 OS=Homo sapiens GN=PLS1 PE=1 SV=2 - [PLSI_HUMAN]	5.86967	4.45	2	2	32.9457	17.97	7	9	25.2282	12.88	6	8	34.2431	18.44	8	10	629	70.2093	5.41455
Q14157-4	Isoform 4 of Ubiquitin-associated protein 2-like OS=Homo sapiens GN=UBAP2L - [UBP2L_HUMAN]					57.0689	16.29	8	16	19.4898	13.93	6	8	31.6327	12.91	6	10	976	103.106	6.87354
Q9H8E3	cDNA FLJ13715 fis, clone PLACE2000404, moderately similar to PROBABLE LEUCYL-TRNA SYNTHETASE (EC 6.1.1.4) OS=Homo sapiens PE=2 SV=1 - [Q9H8E3_HUMAN]	14.2841	8.73	5	5	29.801	11.31	8	8	20.1212	11.85	7	8	26.9	12.28	8	8	928	105.547	6.48096
E9PK01	Elongation factor 1-delta (Fragment) OS=Homo sapiens GN=EEF1D PE=1 SV=1 - [E9PK01_HUMAN]	10.2203	23.75	4	4	23.7128	27.97	5	7	18.1886	32.95	6	8	24.4162	32.95	6	8	261	28.8036	5.021
Q59E97	Galectin (Fragment) OS=Homo sapiens PE=2 SV=1 - [Q59E97_HUMAN]	8.30572	10.06	3	3	19.2141	14.79	4	6	19.7361	24.26	8	8	23.4186	26.33	8	8	338	38.1759	8.90967
Q9Y490	Talin-1 OS=Homo sapiens GN=TLN1 PE=1 SV=3 - [TLN1_HUMAN]					35.4281	5.55	9	9	19.3511	4.84	8	8	32.1466	5.43	8	8	2541	269.599	6.07471
P35998	26S protease regulatory subunit 7 OS=Homo sapiens GN=PSMC2 PE=1 SV=3 - [PRS7_HUMAN]	13.341	16.17	6	7	16.7311	15.94	6	6	21.7476	17.09	5	8	26.08	19.17	6	7	433	48.6031	5.94775
Q9H444	Charged multivesicular body protein 4b OS=Homo sapiens GN=CHMP4B PE=1 SV=1 - [CHM4B_HUMAN]	13.826	19.64	3	4	25.4179	24.11	4	7	22.2653	28.57	6	8	25.8764	24.11	4	7	224	24.9346	4.81787
A0A024R3X1	Galectin OS=Homo sapiens GN=LGALS8 PE=4 SV=1 - [A0A024R3X1_HUMAN]	8.30572	9.47	3	3	13.2082	13.09	4	4	19.7361	22.84	8	8	20.6956	21.17	7	7	359	40.3879	8.99756
P61247	40S ribosomal protein S3a OS=Homo sapiens GN=RPS3A PE=1 SV=2 - [RS3A_HUMAN]	5.54649	10.98	2	2	13.3133	16.29	5	5	19.1951	31.06	7	8	21.1663	26.89	7	7	264	29.9257	9.72998
P42704	Leucine-rich PPR motif-containing protein, mitochondrial OS=Homo sapiens GN=LRPPRC PE=1 SV=3 - [LPPRC_HUMAN]	9.185	3.87	3	4	13.988	4.16	5	5	16.1781	8.11	8	8	17.2519	5.09	6	6	1394	157.805	6.12549
P51116	Fragile X mental retardation syndrome-related protein 2 OS=Homo sapiens GN=FXR2 PE=1 SV=2 - [FXR2_HUMAN]	6.87966	5.2	3	3					18.0888	12.63	7	8	21.5017	16.94	5	6	673	74.178	6.22705
Q8WUM4	Programmed cell death 6-interacting protein OS=Homo sapiens GN=PDCD6IP PE=1 SV=1 - [PDC6I_HUMAN]	5.62316	3.23	3	3	48.6403	18.32	12	15	15.7348	11.06	8	8	17.1036	8.29	5	6	868	95.9631	6.52197
B7ZLX4	PPP1R9A protein OS=Homo sapiens GN=PPP1R9A PE=2 SV=1 - [B7ZLX4_HUMAN]	2.96711	4.22	3	3	18.4929	7.61	5	5	14.171	7.98	7	8	17.9541	10.18	5	6	1090	122.348	5.14795
R4GMT0	Alpha-centractin OS=Homo sapiens GN=ACTR1A PE=1 SV=1 - [R4GMT0_HUMAN]	17.832	28.31	5	7	20.156	12.65	3	5	21.6425	32.83	6	8	19.104	18.98	4	5	332	37.4099	5.65576
Q96PY5	Formin-like protein 2 OS=Homo sapiens GN=FMNL2 PE=1 SV=3 - [FMNL2_HUMAN]	14.8726	8.1	7	7	7.35235	2.95	3	3	16.9471	8.56	8	8	9.74682	3.68	3	4	1086	123.243	7.40088
Q15365	Poly(rC)-binding protein 1 OS=Homo sapiens GN=PCBP1 PE=1 SV=2 - [PCBP1_HUMAN]	5.99986	16.01	2	2	15.7091	13.48	4	5	20.8492	14.33	4	8	12.998	14.61	3	4	356	37.4739	7.09326
A8K6V3	cDNA FLJ78677, highly similar to Homo sapiens splicing factor 3b, subunit 3, 130kDa (SF3B3), mRNA OS=Homo sapiens PE=2 SV=1 - [A8K6V3_HUMAN]					12.6269	4.35	4	4	15.2625	8.38	7	8	11.7066	4.35	4	4	1217	135.493	5.21143
H3BRU6	Poly(rC)-binding protein 2 (Fragment) OS=Homo sapiens GN=PCBP2 PE=1 SV=1 - [H3BRU6_HUMAN]					13.9734	13.95	3	4	21.6553	19.27	4	8	12.3339	13.95	3	4	301	31.6903	8.44092
Q5XKE5	Keratin, type II cytoskeletal 79 OS=Homo sapiens GN=KRT79 PE=1 SV=2 - [K2C79_HUMAN]	34.574	11.03	6	16					17.3333	7.66	5	8	9.15004	5.79	3	3	535	57.8002	7.1958
P36578	60S ribosomal protein L4 OS=Homo sapiens GN=RPL4 PE=1 SV=5 - [RL4_HUMAN]	21.3728	18.03	7	9	8.97697	5.39	3	3	23.8107	16.86	7	8	11.2181	8.43	2	3	427	47.6674	11.063
O00571-2	Isoform 2 of ATP-dependent RNA helicase DDX3X OS=Homo sapiens GN=DDX3X - [DDX3X_HUMAN]	8.86626	6.04	4	4	12.0198	6.97	4	4	18.6129	12.69	8	8	8.89658	5.57	3	3	646	71.3109	6.62451
B2RAU8	cDNA, FLJ95131, highly similar to Homo sapiens nucleolar and coiled-body phosphoprotein 1 (NOLC1), mRNA OS=Homo sapiens PE=2 SV=1 - [B2RAU8_HUMAN]	5.93599	6.15	3	3	19.1766	7.44	4	6	18.3648	10.87	6	8	7.61719	4.01	2	3	699	73.5606	9.42236
P09651-3	Isoform 2 of Heterogeneous nuclear ribonucleoprotein A1 OS=Homo sapiens GN=HNRNPA1 - [ROA1_HUMAN]	4.40099	15.36	4	4	5.82857	10.86	2	2	19.7946	28.46	7	8	5.78332	12.73	2	2	267	29.3682	9.14404
E9PQ56	Poly(U)-binding-splicing factor PUF60 (Fragment) OS=Homo sapiens GN=PUF60 PE=1 SV=4 - [E9PQ56_HUMAN]	9.42616	15.53	3	4					23.3388	28.57	5	8	7.49974	14.6	2	2	322	34.4066	8.5874
Q02241-2	Isoform 2 of Kinesin-like protein KIF23 OS=Homo sapiens GN=KIF23 - [KIF23_HUMAN]					10.834	4.09	2	3	20.0034	10.86	6	8	5.22544	3.27	2	2	856	98.0439	8.47021
P50990	T-complex protein 1 subunit theta OS=Homo sapiens GN=CCT8 PE=1 SV=4 - [TCPQ_HUMAN]	17.5202	14.96	7	7	48.2991	27.55	12	15	19.6039	16.97	7	7	39.134	23.54	10	12	548	59.5825	5.60498
Q86TY5	Galectin OS=Homo sapiens PE=2 SV=1 - [Q86TY5_HUMAN]	8.73322	38.02	4	4	17.65	38.02	4	6	15.286	58.68	6	7	39.3325	58.68	6	12	121	13.8882	9.15869
B5BUB1	RuvB-like 1 (Fragment) OS=Homo sapiens GN=RUVBL1 PE=2 SV=1 - [B5BUB1_HUMAN]	26.3743	25.44	9	12	22.3382	18.86	6	6	20.4574	18.86	7	7	31.2722	23.46	7	9	456	50.1843	6.41748
Q9Y6M4	Casein kinase I isoform gamma-3 OS=Homo sapiens GN=CSNK1G3 PE=1 SV=2 - [KC1G3_HUMAN]					26.3411	14.54	4	6	15.3778	18.57	5	7	28.5735	23.71	7	9	447	51.3559	9.21729
B3KS36	cDNA FLJ35376 fis, clone SKMUS2004044, highly similar to Homo sapiens ribosomal protein L3 (RPL3), transcript variant 2, mRNA OS=Homo sapiens PE=2 SV=1 - [B3KS36_HUMAN]	18.0261	12.99	4	8	16.0383	10.73	3	4	22.3122	18.64	6	7	21.1915	9.89	3	8	354	40.1197	10.3013
P50402	Emerin OS=Homo sapiens GN=EMD PE=1 SV=1 - [EMD_HUMAN]	16.4084	30.31	5	6	16.8647	22.83	4	5	16.065	38.58	6	7	21.6552	33.86	6	8	254	28.9759	5.50342
P05023-3	Isoform 3 of Sodium/potassium-transporting ATPase subunit alpha-1 OS=Homo sapiens GN=ATP1A1 - [AT1A1_HUMAN]	13.4667	7.16	5	5	38.4054	14.42	9	10	19.4977	10.18	6	7	26.9478	13.1	8	8	992	109.48	5.31299
Q14315-2	Isoform 2 of Filamin-C OS=Homo sapiens GN=FLNC - [FLNC_HUMAN]	11.7812	2.45	4	4	25.7029	2.97	6	9	17.6851	2.9	7	7	25.6893	3.38	7	8	2692	287.102	5.97314
Q7RTP6	Protein-methionine sulfoxide oxidase MICAL3 OS=Homo sapiens GN=MICAL3 PE=1 SV=2 - [MICA3_HUMAN]	6.08121	2.15	3	3	23.7046	4.05	7	8	16.4092	4.7	7	7	22.1585	5.09	8	8	2002	224.156	5.5542
B7Z481	cDNA FLJ54018, highly similar to PDZ and LIM domain protein 5 OS=Homo sapiens PE=2 SV=1 - [B7Z481_HUMAN]					16.8619	12.66	3	4	11.9536	20.25	4	7	25.0949	23.63	5	8	474	51.2189	7.78174
Q9H4B7	Tubulin beta-1 chain OS=Homo sapiens GN=TUBB1 PE=1 SV=1 - [TBB1_HUMAN]	12.0478	4.66	3	6	19.1523	7.76	3	6	17.2036	4.66	3	7	17.9566	4.66	4	7	451	50.2946	5.17334
Q9BWS2	LSR protein (Fragment) OS=Homo sapiens GN=LSR PE=2 SV=2 - [Q9BWS2_HUMAN]	9.1128	18.21	6	6	18.1727	13.57	5	5	14.6793	15.64	7	7	21.8522	20.27	7	7	582	64.3064	7.34229
Q15019	Septin-2 OS=Homo sapiens GN=SEPT2 PE=1 SV=1 - [SEPT2_HUMAN]	10.0158	14.96	3	3	18.9631	18.28	4	5	18.5558	23.27	5	7	27.033	21.88	5	7	361	41.4613	6.59521
O00425	Insulin-like growth factor 2 mRNA-binding protein 3 OS=Homo sapiens GN=IGF2BP3 PE=1 SV=2 - [IF2B3_HUMAN]	3.3998	5.7	2	2	12.0646	7.25	3	4	14.4587	15.03	6	7	20.7961	9.84	4	7	579	63.6656	8.86572
J3QL14	V-type proton ATPase subunit d 1 (Fragment) OS=Homo sapiens GN=ATP6V0D1 PE=1 SV=1 - [J3QL14_HUMAN]	10.3055	24.57	5	5	23.0653	21.55	6	7	18.0229	23.71	5	7	22.0306	20.26	5	6	232	26.7983	4.94482
C9JJV6	Myeloid-associated differentiation marker (Fragment) OS=Homo sapiens GN=MYADM PE=1 SV=4 - [C9JJV6_HUMAN]	14.3666	22.6	2	4	23.7343	22.6	2	5	25.3488	22.6	2	7	26.6453	22.6	2	6	146	15.8531	8.646
P07195	L-lactate dehydrogenase B chain OS=Homo sapiens GN=LDHB PE=1 SV=2 - [LDHB_HUMAN]					17.1642	18.26	5	5	14.3927	18.26	6	7	18.8631	17.37	5	6	334	36.6151	6.04932
B4E022	cDNA FLJ56274, highly similar to Transketolase (EC 2.2.1.1) OS=Homo sapiens PE=2 SV=1 - [B4E022_HUMAN]	7.95757	7.99	3	3	22.1075	13.72	5	6	15.91	18.58	7	7	20.6601	14.41	5	5	576	62.8393	7.51807
P52597	Heterogeneous nuclear ribonucleoprotein F OS=Homo sapiens GN=HNRNPF PE=1 SV=3 - [HNRPF_HUMAN]	15.9477	16.39	5	7	6.87574	9.16	2	2	20.6111	13.98	4	7	17.8838	17.11	4	4	415	45.6429	5.57959
P62191-2	Isoform 2 of 26S protease regulatory subunit 4 OS=Homo sapiens GN=PSMC1 - [PRS4_HUMAN]	7.75349	9.81	3	3	14.0923	14.44	4	4	15.4086	18.26	5	7	9.01524	14.44	4	4	367	41.1412	5.0083
O60237	Protein phosphatase 1 regulatory subunit 12B OS=Homo sapiens GN=PPP1R12B PE=1 SV=2 - [MYPT2_HUMAN]	4.44282	2.55	2	2	23.8305	8.25	6	7	13.7127	8.76	6	7	13.4857	6.82	4	4	982	110.337	5.66846
Q96PK6	RNA-binding protein 14 OS=Homo sapiens GN=RBM14 PE=1 SV=2 - [RBM14_HUMAN]					19.0657	12.71	6	6	17.3369	10.31	5	7	13.4373	9.12	4	4	669	69.4489	9.67139
H0Y6E7	RNA-binding motif protein, X chromosome (Fragment) OS=Homo sapiens GN=RBMX PE=1 SV=2 - [H0Y6E7_HUMAN]					5.12766	7.19	2	2	13.7611	28.42	7	7	11.6714	12.67	3	4	292	31.8364	9.84717
Q9Y262	Eukaryotic translation initiation factor 3 subunit L OS=Homo sapiens GN=EIF3L PE=1 SV=1 - [EIF3L_HUMAN]	11.6041	7.98	3	4	8.1388	6.21	2	2	16.606	14.36	6	7	8.17925	5.32	3	3	564	66.6844	6.34131
Q13283	Ras GTPase-activating protein-binding protein 1 OS=Homo sapiens GN=G3BP1 PE=1 SV=1 - [G3BP1_HUMAN]	5.02738	6.01	2	2	18.1717	11.8	4	5	15.5031	14.38	4	7	7.54875	9.66	3	3	466	52.1321	5.51611
B2R8Z8	cDNA, FLJ94136, highly similar to Homo sapiens synaptotagmin binding, cytoplasmic RNA interacting protein (SYNCRIP), mRNA OS=Homo sapiens PE=2 SV=1 - [B2R8Z8_HUMAN]					5.69298	3.21	2	2	14.1971	11.88	6	7	6.70014	6.1	2	3	623	69.5587	8.76318
P31947-2	Isoform 2 of 14-3-3 protein sigma OS=Homo sapiens GN=SFN - [1433S_HUMAN]									12.2872	35.19	6	7	5.2977	20.83	3	3	216	24.321	4.81787
G3V576	Heterogeneous nuclear ribonucleoproteins C1/C2 OS=Homo sapiens GN=HNRNPC PE=4 SV=1 - [G3V576_HUMAN]	9.05147	16.88	3	3	6.44866	11.69	2	2	20.2367	25.11	5	7	6.82817	11.69	2	2	231	25.2411	9.81787
A8K7F6	cDNA FLJ78244, highly similar to Homo sapiens eukaryotic translation initiation factor 4A, isoform 1 (EIF4A1), mRNA OS=Homo sapiens PE=2 SV=1 - [A8K7F6_HUMAN]	8.07101	9.11	3	3					19.8219	17.49	5	7	6.0635	6.16	2	2	406	46.0926	5.47803
P16989-2	Isoform 2 of Y-box-binding protein 3 OS=Homo sapiens GN=YBX3 - [YBOX3_HUMAN]	7.20687	11.88	2	2	22.4971	35.31	4	5	19.876	40.26	6	7	9.3768	18.15	2	2	303	31.928	9.65674
B4DHJ3	DNA-directed RNA polymerase OS=Homo sapiens PE=2 SV=1 - [B4DHJ3_HUMAN]					8.46431	4.11	2	2	13.9682	8.23	7	7	7.8994	4.11	2	2	1167	132.941	7.2251
B4DHR1	cDNA FLJ53009, highly similar to Calreticulin OS=Homo sapiens PE=2 SV=1 - [B4DHR1_HUMAN]									16.5507	31.6	5	7	6.54527	15.57	2	2	212	24.2718	5.10986
B2R984	cDNA, FLJ94268, highly similar to Homo sapiens histone 1, H1e (HIST1H1E), mRNA OS=Homo sapiens PE=2 SV=1 - [B2R984_HUMAN]	53.3526	30.14	13	24	5.21327	10.5	2	2	15.9985	19.63	6	7					219	21.88	11.0337
P16401	Histone H1.5 OS=Homo sapiens GN=HIST1H1B PE=1 SV=3 - [H15_HUMAN]	31.2235	24.34	9	16					16.0893	19.03	6	7					226	22.5665	10.9165
A0A087X130	Ig kappa chain C region OS=Homo sapiens GN=IGKC PE=4 SV=1 - [A0A087X130_HUMAN]	43.504	42.42	6	14					19.7697	26.41	3	7					231	25.1204	6.31592
Q01813	ATP-dependent 6-phosphofructokinase, platelet type OS=Homo sapiens GN=PFKP PE=1 SV=2 - [PFKAP_HUMAN]					13.1304	6.12	3	4	19.6655	10.71	5	7					784	85.5415	7.54736
Q92804-2	Isoform Short of TATA-binding protein-associated factor 2N OS=Homo sapiens GN=TAF15 - [RBP56_HUMAN]					14.6554	10.36	2	10	13.9318	12.73	3	7					589	61.521	8.01611
E7ET15	U2 snRNP-associated SURP motif-containing protein OS=Homo sapiens GN=U2SURP PE=1 SV=1 - [E7ET15_HUMAN]									15.0902	9.05	7	7					1028	118.175	8.54346
Q7Z2K8	G protein-regulated inducer of neurite outgrowth 1 OS=Homo sapiens GN=GPRIN1 PE=2 SV=2 - [GRIN1_HUMAN]	7.61072	4.76	3	3	65.1471	24.7	20	21	12.5051	10.02	6	6	61.294	26.29	17	21	1008	102.336	8.06006
Q9UJZ1-2	Isoform 2 of Stomatin-like protein 2, mitochondrial OS=Homo sapiens GN=STOML2 - [STML2_HUMAN]	7.24644	16.08	3	3	33.3292	32.8	6	9	17.0528	24.76	5	6	45.7526	48.87	8	11	311	33.3166	8.25049
Q96IZ0	PRKC apoptosis WT1 regulator protein OS=Homo sapiens GN=PAWR PE=1 SV=1 - [PAWR_HUMAN]	16.9133	21.47	5	5	25.2455	22.06	6	6	16.4635	21.47	6	6	31.4735	29.12	7	9	340	36.5454	5.41455
A1L390-3	Isoform 3 of Pleckstrin homology domain-containing family G member 3 OS=Homo sapiens GN=PLEKHG3 - [PKHG3_HUMAN]	5.49993	4.39	3	3	24.25	7.22	5	7	16.9167	7.22	5	6	25.9623	11.09	8	9	1163	128.168	6.75635
P54136-2	Isoform Monomeric of Arginine--tRNA ligase, cytoplasmic OS=Homo sapiens GN=RARS - [SYRC_HUMAN]	8.14952	7.31	3	4	26.1411	10.37	5	7	14.8057	9.18	4	6	23.505	10.37	5	7	588	67.0975	6.55127
B4DSM6	cDNA FLJ54057, highly similar to Neutral alpha-glucosidase AB OS=Homo sapiens PE=2 SV=1 - [B4DSM6_HUMAN]	9.41433	5.67	4	4	20.9676	10.15	6	7	13.1333	10.51	6	6	22.6673	11.57	7	7	847	96.2249	5.77002
Q05639	Elongation factor 1-alpha 2 OS=Homo sapiens GN=EEF1A2 PE=1 SV=1 - [EF1A2_HUMAN]	7.1845	4.97	2	3	13.6137	6.48	3	5	9.40899	15.33	5	6	23.648	17.49	6	7	463	50.4383	9.02686
Q92945	Far upstream element-binding protein 2 OS=Homo sapiens GN=KHSRP PE=1 SV=4 - [FUBP2_HUMAN]	5.15625	3.38	2	2	27.211	18.85	8	8	14.4804	13.64	6	6	22.2383	16.03	7	7	711	73.07	7.29834
Q63ZY3-3	Isoform 3 of KN motif and ankyrin repeat domain-containing protein 2 OS=Homo sapiens GN=KANK2 - [KANK2_HUMAN]	5.28222	3.8	2	2	21.7797	13.44	6	6	17.3892	9.99	6	6	22.5885	7.49	6	7	841	89.9885	5.94775
P02786	Transferrin receptor protein 1 OS=Homo sapiens GN=TFRC PE=1 SV=2 - [TFR1_HUMAN]	4.632	3.82	2	2	16.3506	7.89	5	5	12.2186	10.66	6	6	22.3626	12.11	7	7	760	84.8179	6.60986
O94919	Endonuclease domain-containing 1 protein OS=Homo sapiens GN=ENDOD1 PE=1 SV=2 - [ENDD1_HUMAN]	12.2771	12	5	5	14.5147	11.4	4	4	13.6332	16.8	6	6	21.6394	12	5	6	500	54.9813	5.70654
Q86X29-6	Isoform 6 of Lipolysis-stimulated lipoprotein receptor OS=Homo sapiens GN=LSR - [LSR_HUMAN]	6.41674	18.46	5	5	17.5771	16.02	5	5	11.9784	15.42	6	6	18.1246	20.89	6	6	493	54.4649	8.85107
Q4KMQ1	Taperin OS=Homo sapiens GN=TPRN PE=1 SV=2 - [TPRN_HUMAN]	7.01536	6.05	2	2	29.8022	18.14	8	8	17.1112	17.44	5	6	26.1614	17.72	6	6	711	75.5097	7.25439
E9PHY5	Band 4.1-like protein 2 OS=Homo sapiens GN=EPB41L2 PE=4 SV=1 - [E9PHY5_HUMAN]					21.2802	9.63	5	6	17.4791	8.88	5	6	26.1546	16.68	5	6	935	104.296	5.38916
O94905	Erlin-2 OS=Homo sapiens GN=ERLIN2 PE=1 SV=1 - [ERLN2_HUMAN]	12.41	16.52	5	5	25.183	23.3	7	8	10.6369	14.45	5	6	19.8571	17.7	5	5	339	37.8155	5.61768
E9PKZ0	60S ribosomal protein L8 (Fragment) OS=Homo sapiens GN=RPL8 PE=1 SV=1 - [E9PKZ0_HUMAN]	13.4437	11.71	3	5	17.2941	17.07	4	5	13.2523	17.07	4	6	16.2556	13.66	3	5	205	22.3752	10.7554
Q9H2D6-5	Isoform 1 of TRIO and F-actin-binding protein OS=Homo sapiens GN=TRIOBP - [TARA_HUMAN]	6.96088	4.55	2	3	28.3898	10.46	5	9	14.5095	12.31	6	6	15.4338	8.6	4	5	593	67.9993	6.1001
Q9BTV4	Transmembrane protein 43 OS=Homo sapiens GN=TMEM43 PE=1 SV=1 - [TMM43_HUMAN]	4.89399	8.75	3	3	5.27081	6.25	2	2	12.1098	17.75	5	6	20.1913	19.75	4	5	400	44.8472	8.1333
Q13393-4	Isoform PLD1D of Phospholipase D1 OS=Homo sapiens GN=PLD1 - [PLD1_HUMAN]	18.3633	9.06	6	7	25.4244	8.24	5	7	17.3	7.93	5	6	11.0154	5.56	4	4	971	112.113	9.08545
P18124	60S ribosomal protein L7 OS=Homo sapiens GN=RPL7 PE=1 SV=1 - [RL7_HUMAN]	12.2817	25.81	5	7	7.79941	12.9	3	3	11.7606	25	5	6	11.5955	17.74	3	4	248	29.2072	10.6528
Q02878	60S ribosomal protein L6 OS=Homo sapiens GN=RPL6 PE=1 SV=3 - [RL6_HUMAN]	8.58123	14.24	5	6					8.20471	18.75	6	6	10.5471	11.11	3	4	288	32.7076	10.5796
Q96IR1	RPS4X protein (Fragment) OS=Homo sapiens GN=RPS4X PE=2 SV=2 - [Q96IR1_HUMAN]	11.4813	16.87	4	4	11.267	11.93	3	4	13.0443	23.87	5	6	9.99157	15.64	4	4	243	27.2427	9.93506
A0A087WV66	Antigen KI-67 OS=Homo sapiens GN=MKI67 PE=1 SV=1 - [A0A087WV66_HUMAN]	5.0832	1.6	2	2	28.6649	5.01	9	9	12.2119	3.75	6	6	12.3329	2.33	4	4	3255	358.407	9.42236
Q04917	14-3-3 protein eta OS=Homo sapiens GN=YWHAH PE=1 SV=4 - [1433F_HUMAN]					8.56584	15.45	3	3	14.4506	23.98	5	6	13.1857	16.67	3	4	246	28.201	4.84326
O14639-3	Isoform 3 of Actin-binding LIM protein 1 OS=Homo sapiens GN=ABLIM1 - [ABLM1_HUMAN]					12.724	11.01	4	4	13.3256	22.72	6	6	13.5184	14.29	3	4	427	48.7734	8.60205
B4E091	cDNA FLJ55438, highly similar to Splicing factor 3 subunit 1 OS=Homo sapiens PE=2 SV=1 - [B4E091_HUMAN]					14.771	10	4	4	18.1328	12.17	6	6	12.8157	6.67	3	4	690	77.3577	5.16064
P31689	DnaJ homolog subfamily A member 1 OS=Homo sapiens GN=DNAJA1 PE=1 SV=2 - [DNJA1_HUMAN]	5.91141	11.84	3	3	4.44576	8.82	2	2	11.9058	16.62	4	6	10.0435	8.82	2	3	397	44.8395	7.07861
Q9Y5B9	FACT complex subunit SPT16 OS=Homo sapiens GN=SUPT16H PE=1 SV=1 - [SP16H_HUMAN]	8.60016	4.58	3	3	7.36957	3.53	2	2	16.1724	8.12	6	6	9.01369	4.68	3	3	1047	119.838	5.65576
B3KTH9	cDNA FLJ38275 fis, clone FCBBF3003902, highly similar to GAS2-like protein 3 OS=Homo sapiens PE=2 SV=1 - [B3KTH9_HUMAN]	4.47004	4.07	2	2	16.3923	12.2	5	5	17.7923	16.78	6	6	11.5593	9.66	3	3	590	63.5503	9.90576
P61981	14-3-3 protein gamma OS=Homo sapiens GN=YWHAG PE=1 SV=2 - [1433G_HUMAN]					12.7805	15.38	3	4	9.46353	19.03	5	6	9.40636	15.38	3	3	247	28.2849	4.89404
I3L3Q7	Complement component 1 Q subcomponent-binding protein, mitochondrial (Fragment) OS=Homo sapiens GN=C1QBP PE=1 SV=1 - [I3L3Q7_HUMAN]									14.8263	38.42	3	6	13.9511	23.16	2	3	177	19.9936	4.22119
P46778	60S ribosomal protein L21 OS=Homo sapiens GN=RPL21 PE=1 SV=2 - [RL21_HUMAN]									12.3285	16.88	2	6	5.63846	18.13	2	2	160	18.5531	10.4917
P24928	DNA-directed RNA polymerase II subunit RPB1 OS=Homo sapiens GN=POLR2A PE=1 SV=2 - [RPB1_HUMAN]									12.3933	5.18	6	6	6.1762	2.34	2	2	1970	217.039	7.37158
B8ZZL5	MIT domain-containing protein 1 (Fragment) OS=Homo sapiens GN=MITD1 PE=1 SV=1 - [B8ZZL5_HUMAN]									14.6037	28.43	5	6	7.21421	9.14	2	2	197	23.0157	7.44482
P35611-2	Isoform 2 of Alpha-adducin OS=Homo sapiens GN=ADD1 - [ADDA_HUMAN]	10.8843	10.62	4	4	8.42972	5.55	3	3	16.8853	11.89	5	6					631	69.9413	6.45557
P11387	DNA topoisomerase 1 OS=Homo sapiens GN=TOP1 PE=1 SV=2 - [TOP1_HUMAN]					13.3473	5.1	3	4	11.6411	8.5	6	6					765	90.6689	9.30518
Q08945	FACT complex subunit SSRP1 OS=Homo sapiens GN=SSRP1 PE=1 SV=1 - [SSRP1_HUMAN]									13.5721	10.3	5	6					709	81.0244	6.87354
A8MXL6	Protein SEC13 homolog OS=Homo sapiens GN=SEC13 PE=1 SV=1 - [A8MXL6_HUMAN]									13.3566	17.96	3	6					284	31.5753	5.8208
D3DWL9	Cleavage and polyadenylation specific factor 1, 160kDa, isoform CRA_a OS=Homo sapiens GN=CPSF1 PE=4 SV=1 - [D3DWL9_HUMAN]									15.4036	5.57	6	6					1365	151.89	6.32861
Q9P2M7	Cingulin OS=Homo sapiens GN=CGN PE=1 SV=2 - [CING_HUMAN]					40.1991	15.37	13	13	13.108	7.27	5	5	42.7659	13.37	12	14	1197	136.304	5.5415
Q13263-2	Isoform 2 of Transcription intermediary factor 1-beta OS=Homo sapiens GN=TRIM28 - [TIF1B_HUMAN]	11.8953	11.82	4	5	54.1464	30.01	12	17	16.1074	13.41	5	5	45.7622	23.51	10	12	753	79.4235	5.98584
Q12904	Aminoacyl tRNA synthase complex-interacting multifunctional protein 1 OS=Homo sapiens GN=AIMP1 PE=1 SV=2 - [AIMP1_HUMAN]	11.9572	22.12	4	4	15.5406	16.03	4	4	12.6907	27.24	5	5	31.1414	38.46	7	11	312	34.3311	8.42627
A5YKK6-2	Isoform 2 of CCR4-NOT transcription complex subunit 1 OS=Homo sapiens GN=CNOT1 - [CNOT1_HUMAN]					23.9662	3.21	7	8	12.2947	2.78	5	5	28.4997	5.27	10	10	2371	266.211	7.04932
P35232	Prohibitin OS=Homo sapiens GN=PHB PE=1 SV=1 - [PHB_HUMAN]	7.45518	18.38	4	4	21.5065	29.78	7	7	11.4974	23.9	5	5	31.8268	30.88	7	9	272	29.7859	5.75732
P25786	Proteasome subunit alpha type-1 OS=Homo sapiens GN=PSMA1 PE=1 SV=1 - [PSA1_HUMAN]	6.2917	11.41	2	2	28.6399	22.43	5	8	13.2133	19.01	4	5	26.781	27	6	9	263	29.5369	6.60986
B2RBH6	cDNA, FLJ95513, highly similar to Homo sapiens cyclin fold protein 1 (CFP1), mRNA OS=Homo sapiens PE=2 SV=1 - [B2RBH6_HUMAN]	3.13504	6.74	2	2					8.53891	9.09	3	5	21.6514	15.84	5	9	341	39.2289	7.18115
A0A0A0MSI0	Peroxiredoxin-1 (Fragment) OS=Homo sapiens GN=PRDX1 PE=4 SV=1 - [A0A0A0MSI0_HUMAN]	9.7917	27.49	4	4	18.2742	33.92	5	7	9.38122	28.65	5	5	25.8647	45.61	8	8	171	18.9637	6.91748
O15371-2	Isoform 2 of Eukaryotic translation initiation factor 3 subunit D OS=Homo sapiens GN=EIF3D - [EIF3D_HUMAN]	8.80972	13.43	3	3	12.2687	8.42	2	3	10.6253	14.43	5	5	22.2214	16.43	5	8	499	58.1037	5.70654
P24844	Myosin regulatory light polypeptide 9 OS=Homo sapiens GN=MYL9 PE=1 SV=4 - [MYL9_HUMAN]					20.0089	27.91	4	6	13.4426	22.67	3	5	28.942	38.37	5	8	172	19.8144	4.91943
Q99959-2	Isoform 1 of Plakophilin-2 OS=Homo sapiens GN=PKP2 - [PKP2_HUMAN]					64.7605	19	10	18	13.2384	10.51	5	5	27.1839	13.14	7	8	837	92.6985	9.29053
B7ZM87	SLIT-ROBO Rho GTPase-activating protein 2 OS=Homo sapiens GN=SRGAP2 PE=2 SV=1 - [B7ZM87_HUMAN]					20.05	8.04	7	7	14.1917	6.54	5	5	25.4567	9.91	8	8	1070	120.667	6.69775
G5EA42	Tropomodulin 2 (Neuronal), isoform CRA_a OS=Homo sapiens GN=TMOD2 PE=4 SV=1 - [G5EA42_HUMAN]	7.60609	9.45	2	3					12.1556	19.22	4	5	24.9056	19.22	4	7	307	34.4711	6.85889
P29692-3	Isoform 3 of Elongation factor 1-delta OS=Homo sapiens GN=EEF1D - [EF1D_HUMAN]	7.23441	14.79	3	3	21.7137	23.35	4	6	10.1203	20.23	4	5	21.2291	28.4	5	7	257	28.5404	4.91943
B3KTJ9	cDNA FLJ38393 fis, clone FEBRA2007212 OS=Homo sapiens PE=2 SV=1 - [B3KTJ9_HUMAN]					31.5328	13.87	6	11	10.5732	8.45	4	5	24.4404	15.06	5	7	923	102.866	5.22412
Q99988	Growth/differentiation factor 15 OS=Homo sapiens GN=GDF15 PE=1 SV=3 - [GDF15_HUMAN]	8.55359	16.23	4	4	10.8607	17.53	4	4	9.09429	19.81	5	5	16.9673	19.48	5	6	308	34.1188	9.65674
Q96HS1	Serine/threonine-protein phosphatase PGAM5, mitochondrial OS=Homo sapiens GN=PGAM5 PE=1 SV=2 - [PGAM5_HUMAN]	4.61551	9	3	3	8.01727	10.73	3	3	11.654	15.57	4	5	16.4797	18.34	5	6	289	31.9846	8.67529
P53396-2	Isoform 2 of ATP-citrate synthase OS=Homo sapiens GN=ACLY - [ACLY_HUMAN]					11.4129	4.22	4	4	12.6094	5.87	5	5	13.6252	4.95	4	5	1091	119.695	7.32764
P33176	Kinesin-1 heavy chain OS=Homo sapiens GN=KIF5B PE=1 SV=1 - [KINH_HUMAN]					9.23525	5.09	3	3	11.5998	6.75	5	5	17.2155	7.68	5	5	963	109.617	6.50732
P55795	Heterogeneous nuclear ribonucleoprotein H2 OS=Homo sapiens GN=HNRNPH2 PE=1 SV=1 - [HNRH2_HUMAN]	12.7581	9.58	3	4	17.0339	7.35	2	4	14.995	11.14	3	5	17.2913	12.03	3	4	449	49.2323	6.30322
P43243	Matrin-3 OS=Homo sapiens GN=MATR3 PE=1 SV=2 - [MATR3_HUMAN]	4.81536	5.67	3	3	16.4591	5.79	3	7	13.6571	7.2	4	5	12.4606	5.9	3	4	847	94.5648	6.25244
P00338	L-lactate dehydrogenase A chain OS=Homo sapiens GN=LDHA PE=1 SV=2 - [LDHA_HUMAN]	5.26081	6.02	2	2	9.43815	10.84	3	3	12.0868	17.17	5	5	11.2185	12.95	4	4	332	36.6654	8.26514
P10644-2	Isoform 2 of cAMP-dependent protein kinase type I-alpha regulatory subunit OS=Homo sapiens GN=PRKAR1A - [KAP0_HUMAN]	5.15228	8.31	2	2	26.4749	19.29	5	7	14.3088	13.95	4	5	15.3307	15.73	3	4	337	37.9793	5.12256
B7ZLC9	GEMIN5 protein OS=Homo sapiens GN=GEMIN5 PE=2 SV=1 - [B7ZLC9_HUMAN]					14.5986	4.64	3	5	12.7855	5.71	4	5	10.0668	4.71	3	4	1507	168.326	6.62451
H0YBN6	Casein kinase I isoform gamma-3 (Fragment) OS=Homo sapiens GN=CSNK1G3 PE=1 SV=1 - [H0YBN6_HUMAN]					20.2335	34.76	3	4	11.7452	34.76	3	5	13.5977	28.05	3	4	164	19.2965	8.1333
A8K9K6	cDNA FLJ76962, highly similar to Homo sapiens nucleolar protein 5A (56kDa with KKE/D repeat) (NOL5A), mRNA OS=Homo sapiens PE=2 SV=1 - [A8K9K6_HUMAN]					11.192	7.58	4	4	9.47792	10.27	5	5	12.0911	8.42	4	4	594	65.9367	9.23193
B4DUD6	cDNA FLJ54551, highly similar to Septin-7 OS=Homo sapiens PE=2 SV=1 - [B4DUD6_HUMAN]									8.0964	11.71	4	5	10.9151	10.73	3	4	410	47.8507	8.73389
P42025	Beta-centractin OS=Homo sapiens GN=ACTR1B PE=1 SV=1 - [ACTY_HUMAN]	11.659	14.63	3	5	11.5888	6.65	2	3	13.4464	20.74	4	5	11.695	10.11	2	3	376	42.2667	6.40479
P62269	40S ribosomal protein S18 OS=Homo sapiens GN=RPS18 PE=1 SV=3 - [RS18_HUMAN]	5.62079	26.97	4	4	6.44233	15.79	2	2	11.4422	26.97	5	5	9.84242	15.79	3	3	152	17.7079	10.9897
P49411	Elongation factor Tu, mitochondrial OS=Homo sapiens GN=TUFM PE=1 SV=2 - [EFTU_HUMAN]	8.89707	10.4	3	3					11.8551	14.16	4	5	9.81645	10.84	3	3	452	49.5102	7.60596
P78368	Casein kinase I isoform gamma-2 OS=Homo sapiens GN=CSNK1G2 PE=1 SV=1 - [KC1G2_HUMAN]	8.35696	6.27	2	3	5.74316	6.51	2	2	7.94176	13.01	2	5	8.45356	8.19	3	3	415	47.4272	9.05615
P11233	Ras-related protein Ral-A OS=Homo sapiens GN=RALA PE=1 SV=1 - [RALA_HUMAN]	4.90227	19.9	3	3	8.08661	14.08	2	2	14.3108	20.39	4	5	11.3401	15.05	3	3	206	23.552	7.10791
P62750	60S ribosomal protein L23a OS=Homo sapiens GN=RPL23A PE=1 SV=1 - [RL23A_HUMAN]	8.00812	18.59	3	3	8.88857	15.38	2	3	9.26578	28.85	5	5	8.15349	16.03	3	3	156	17.6841	10.4478
Q13347	Eukaryotic translation initiation factor 3 subunit I OS=Homo sapiens GN=EIF3I PE=1 SV=1 - [EIF3I_HUMAN]	5.90676	8.92	2	2					14.7496	16.62	3	5	8.75895	16.92	3	3	325	36.4786	5.64307
O14939-4	Isoform PLD2B of Phospholipase D2 OS=Homo sapiens GN=PLD2 - [PLD2_HUMAN]	4.98974	3.36	2	2	11.5253	3.36	2	3	15.5849	5.64	3	5	9.11078	4.88	3	3	922	104.592	7.34229
Q14156-3	Isoform 3 of Protein EFR3 homolog A OS=Homo sapiens GN=EFR3A - [EFR3A_HUMAN]					4.52709	2.96	2	2	10.5352	8.24	5	5	8.97991	5.92	3	3	777	87.5241	6.60986
Q9UJW0-2	Isoform 2 of Dynactin subunit 4 OS=Homo sapiens GN=DCTN4 - [DCTN4_HUMAN]	12.8148	14.64	3	6	6.94115	6.7	2	2	7.50744	17.87	3	5	9.66373	11.66	2	2	403	45.7274	7.59131
P47897-2	Isoform 2 of Glutamine--tRNA ligase OS=Homo sapiens GN=QARS - [SYQ_HUMAN]	9.20143	5.1	3	4	8.95332	6.54	4	4	11.3506	8.9	5	5	7.45271	3.8	2	2	764	86.5242	7.04932
P26038	Moesin OS=Homo sapiens GN=MSN PE=1 SV=3 - [MOES_HUMAN]	7.52726	3.64	2	3	5.82187	4.68	2	2	12.821	8.67	4	5	6.54169	5.89	2	2	577	67.7778	6.40479
E7EU96	Casein kinase II subunit alpha OS=Homo sapiens GN=CSNK2A1 PE=1 SV=1 - [E7EU96_HUMAN]	6.08275	6.49	2	3					9.35676	13.25	4	5	5.72986	6.49	2	2	385	45.2819	7.94287
Q8WUN7	Ubiquitin domain-containing protein 2 OS=Homo sapiens GN=UBTD2 PE=1 SV=2 - [UBTD2_HUMAN]	0	10.26	2	2	4.83591	10.26	2	2	7.19903	21.79	4	5	6.34561	14.1	2	2	234	26.1731	5.66846
A8KA33	cDNA FLJ76690, highly similar to Homo sapiens neuronal protein isoform a mRNA OS=Homo sapiens PE=2 SV=1 - [A8KA33_HUMAN]	4.60259	4.45	2	2	8.3966	5.03	2	2	15.7641	9.34	4	5	9.64173	4.89	2	2	696	77.0892	5.8335
P78347-2	Isoform 2 of General transcription factor II-I OS=Homo sapiens GN=GTF2I - [GTF2I_HUMAN]					11.774	5.33	4	4	6.37951	3.55	3	5	4.39365	2.4	2	2	957	107.902	7.94287
B3KVX6	cDNA FLJ41699 fis, clone HCHON2004776, highly similar to Homo sapiens cytoskeleton-associated protein 4 (CKAP4), mRNA OS=Homo sapiens PE=2 SV=1 - [B3KVX6_HUMAN]					8.64627	8.25	3	3	13.1601	11.52	4	5	5.28272	4.41	2	2	521	58.1158	5.24951
Q9UMS4	Pre-mRNA-processing factor 19 OS=Homo sapiens GN=PRPF19 PE=1 SV=1 - [PRP19_HUMAN]	4.79332	7.34	2	2					11.3695	13.69	4	5					504	55.1463	6.60986
O43390-4	Isoform 4 of Heterogeneous nuclear ribonucleoprotein R OS=Homo sapiens GN=HNRNPR - [HNRPR_HUMAN]	4.84206	3.93	2	2	5.69298	3.74	2	2	8.9463	13.83	5	5					535	59.9158	9.15869
P12532	Creatine kinase U-type, mitochondrial OS=Homo sapiens GN=CKMT1A PE=1 SV=1 - [KCRU_HUMAN]									14.4035	7.43	2	5					417	47.0072	8.33838
P14649	Myosin light chain 6B OS=Homo sapiens GN=MYL6B PE=1 SV=1 - [MYL6B_HUMAN]	20.5943	28.85	5	8	63.781	30.77	7	25	8.24549	12.5	2	4	52.3602	47.12	10	20	208	22.7497	5.73193
O60658	High affinity cAMP-specific and IBMX-insensitive 3',5'-cyclic phosphodiesterase 8A OS=Homo sapiens GN=PDE8A PE=1 SV=2 - [PDE8A_HUMAN]	5.85856	3.86	2	2	33.8228	11.7	7	9	13.0008	7.24	4	4	32.4964	13.39	8	10	829	93.2448	6.11279
F8W1I6	Dynactin subunit 2 OS=Homo sapiens GN=DCTN2 PE=1 SV=1 - [F8W1I6_HUMAN]	10.8544	16.83	4	5	31.0016	24.76	7	9	10.635	16.51	3	4	33.1809	24.44	6	8	315	34.2376	4.98291
Q13557-12	Isoform Delta 12 of Calcium/calmodulin-dependent protein kinase type II subunit delta OS=Homo sapiens GN=CAMK2D - [KCC2D_HUMAN]	11.0534	11.51	4	4	16.0118	12.13	4	5	9.2774	6.49	2	4	26.5581	17.15	6	8	478	54.0794	7.12256
P46087-2	Isoform 2 of Probable 28S rRNA (cytosine(4447)-C(5))-methyltransferase OS=Homo sapiens GN=NOP2 - [NOP2_HUMAN]					10.4811	5.94	4	4	9.17179	4.83	3	4	20.3825	11.63	7	7	808	88.9189	9.23193
Q68DY8	Putative uncharacterized protein DKFZp686I11137 OS=Homo sapiens GN=DKFZp686I11137 PE=2 SV=1 - [Q68DY8_HUMAN]					35.7238	9.45	4	10	8.68847	7.95	3	4	21.5189	6.75	3	7	667	73.2843	5.2876
P27824	Calnexin OS=Homo sapiens GN=CANX PE=1 SV=2 - [CALX_HUMAN]	11.0477	7.43	4	4	16.0866	8.95	5	5	11.8691	8.28	4	4	20.113	8.95	5	6	592	67.5259	4.60205
P05141	ADP/ATP translocase 2 OS=Homo sapiens GN=SLC25A5 PE=1 SV=7 - [ADT2_HUMAN]	5.32102	7.72	2	2					6.7174	13.42	4	4	14.4436	13.42	4	6	298	32.8312	9.68604
A0A087X253	AP-2 complex subunit beta OS=Homo sapiens GN=AP2B1 PE=1 SV=1 - [A0A087X253_HUMAN]					18.1956	7.67	6	6	8.57606	4.49	4	4	14.2793	6.13	6	6	913	101.268	5.2876
P43686-2	Isoform 2 of 26S protease regulatory subunit 6B OS=Homo sapiens GN=PSMC4 - [PRS6B_HUMAN]	9.00369	16.28	4	4	4.81459	5.68	2	2	9.16015	16.28	4	4	13.8314	16.8	4	5	387	43.4805	5.26221
H3BMU1	IST1 homolog (Fragment) OS=Homo sapiens GN=IST1 PE=1 SV=1 - [H3BMU1_HUMAN]	7.20637	27.67	3	4	7.4394	14.56	3	3	8.3175	27.67	3	4	15.8527	23.3	2	5	206	23.3605	6.60986
M0QZC5	40S ribosomal protein S11 OS=Homo sapiens GN=RPS11 PE=1 SV=1 - [M0QZC5_HUMAN]	4.30443	30.51	3	3					6.65779	19.49	2	4	12.9696	19.49	3	5	118	13.9885	10.3159
O60763	General vesicular transport factor p115 OS=Homo sapiens GN=USO1 PE=1 SV=2 - [USO1_HUMAN]					17.4057	7.9	5	5	8.61421	6.76	4	4	15.3463	7.8	5	5	962	107.828	4.90674
B7Z954	cDNA FLJ61560, highly similar to Tight junction protein ZO-2 OS=Homo sapiens PE=2 SV=1 - [B7Z954_HUMAN]					22.7356	7.4	5	7	7.42588	5.14	4	4	13.4853	6.68	4	5	1108	124.801	8.68994
B4DY09	Interleukin enhancer-binding factor 2 OS=Homo sapiens GN=ILF2 PE=2 SV=1 - [B4DY09_HUMAN]	9.57521	20.45	4	5					9.50864	20.45	4	4	15.1929	17.61	3	4	352	38.8862	4.94482
P23526	Adenosylhomocysteinase OS=Homo sapiens GN=AHCY PE=1 SV=4 - [SAHH_HUMAN]	9.09488	9.95	4	4	7.74621	6.02	2	2	8.85594	9.95	4	4	12.5477	7.87	3	4	432	47.6852	6.34131
P12236	ADP/ATP translocase 3 OS=Homo sapiens GN=SLC25A6 PE=1 SV=4 - [ADT3_HUMAN]	4.49649	7.72	2	2					5.87408	13.42	4	4	9.31527	13.42	4	4	298	32.8452	9.74463
Q9H4M7	Pleckstrin homology domain-containing family A member 4 OS=Homo sapiens GN=PLEKHA4 PE=1 SV=2 - [PKHA4_HUMAN]	7.23483	4.88	2	2	16.6057	7.32	4	4	12.0434	10.14	4	4	14.2064	7.32	3	4	779	85.3489	10.5649
E9PM69	26S protease regulatory subunit 6A OS=Homo sapiens GN=PSMC3 PE=1 SV=1 - [E9PM69_HUMAN]	2.0372	8.06	2	2					8.76086	14.61	4	4	13.6843	16.62	4	4	397	44.2958	5.04639
Q10567-3	Isoform C of AP-1 complex subunit beta-1 OS=Homo sapiens GN=AP1B1 - [AP1B1_HUMAN]					22.7428	7.88	7	7	8.80807	5.01	4	4	9.91599	2.98	4	4	939	103.498	5.16064
O95782-2	Isoform B of AP-2 complex subunit alpha-1 OS=Homo sapiens GN=AP2A1 - [AP2A1_HUMAN]					15.404	7.75	5	8	5.67518	5.34	3	4	9.84001	5.65	4	4	955	105.295	7.66455
A0MZ66-5	Isoform 5 of Shootin-1 OS=Homo sapiens GN=KIAA1598 - [SHOT1_HUMAN]					24.7051	18.74	6	8	10.5639	13.84	4	4	12.2411	11.38	4	4	571	64.4801	5.35107
F5GY37	Prohibitin-2 OS=Homo sapiens GN=PHB2 PE=1 SV=1 - [F5GY37_HUMAN]					12.5341	18.73	5	6	9.30507	16.1	4	4	10.3033	16.1	4	4	267	29.705	9.87646
Q9NZM1-5	Isoform 5 of Myoferlin OS=Homo sapiens GN=MYOF - [MYOF_HUMAN]									7.6016	2.92	3	4	12.661	2.28	2	4	1577	179.438	6.32861
B4E106	cDNA FLJ53399, highly similar to Monocarboxylate transporter 1 OS=Homo sapiens PE=2 SV=1 - [B4E106_HUMAN]									6.38187	11.67	3	4	15.5243	8.75	3	4	480	51.8448	8.74854
Q14444-2	Isoform 2 of Caprin-1 OS=Homo sapiens GN=CAPRIN1 - [CAPR1_HUMAN]	7.89488	9.8	2	5	10.3627	9.37	3	3	8.15433	7.78	2	4	6.26225	7.78	2	3	694	76.8143	5.12256
O43293	Death-associated protein kinase 3 OS=Homo sapiens GN=DAPK3 PE=1 SV=1 - [DAPK3_HUMAN]	8.00889	13.22	4	4	5.70115	4.41	2	2	12.0796	11.01	3	4	9.76515	9.69	3	3	454	52.5034	6.88818
Q8WYL5	Protein phosphatase Slingshot homolog 1 OS=Homo sapiens GN=SSH1 PE=1 SV=2 - [SSH1_HUMAN]	10.4795	7.05	4	4	17.387	10.01	5	5	11.8233	5.15	4	4	10.1252	4.29	3	3	1049	115.439	6.25244
A8KA83	cDNA FLJ78586, highly similar to Homo sapiens VAMP (vesicle-associated membrane protein)-associated protein A, 33kDa (VAPA), mRNA OS=Homo sapiens PE=2 SV=1 - [A8KA83_HUMAN]	8.66795	17.36	3	4					5.35603	18.18	4	4	5.88499	16.12	3	3	242	27.3	8.6167
Q9Y4F1	FERM, RhoGEF and pleckstrin domain-containing protein 1 OS=Homo sapiens GN=FARP1 PE=1 SV=1 - [FARP1_HUMAN]	9.16129	4.59	3	3	19.1752	10.43	5	5	10.7798	5.26	4	4	12.9799	7.85	3	3	1045	118.559	8.14795
O95292	Vesicle-associated membrane protein-associated protein B/C OS=Homo sapiens GN=VAPB PE=1 SV=3 - [VAPB_HUMAN]	5.28072	10.29	2	2	7.84052	11.93	2	2	9.93758	16.05	3	4	9.81601	11.93	2	3	243	27.2111	7.29834
K7ER94	FH1/FH2 domain-containing protein 3 (Fragment) OS=Homo sapiens GN=FHOD3 PE=1 SV=1 - [K7ER94_HUMAN]	4.74278	2.33	2	2					8.92482	6.83	4	4	8.90419	4.5	3	3	1200	133.96	5.89697
P11171-6	Isoform 6 of Protein 4.1 OS=Homo sapiens GN=EPB41 - [41_HUMAN]					6.82192	6.71	2	2	10.1383	10.6	4	4	9.59154	10.25	3	3	566	63.2156	6.66846
F8W020	Nucleosome assembly protein 1-like 1 (Fragment) OS=Homo sapiens GN=NAP1L1 PE=1 SV=1 - [F8W020_HUMAN]					10.8141	26.09	3	4	10.906	16.91	2	4	12.9426	16.91	2	3	207	24.3513	4.51318
B4DPM7	cDNA FLJ55739, highly similar to 26S proteasome non-ATPase regulatory subunit 3 OS=Homo sapiens PE=2 SV=1 - [B4DPM7_HUMAN]					18.2019	15.66	5	5	9.48622	9.59	4	4	10.598	14.29	3	3	511	58.326	7.97217
Q59EK6	TNF receptor-associated protein 1 variant (Fragment) OS=Homo sapiens PE=3 SV=1 - [Q59EK6_HUMAN]					24.7477	11.52	6	7	11.6185	6.69	3	4	9.4641	3.84	2	3	703	79.9427	8.20654
B2R7C5	DNA helicase OS=Homo sapiens PE=2 SV=1 - [B2R7C5_HUMAN]					3.08758	2.48	2	2	8.57576	8.66	4	4	5.51798	4.33	3	3	808	90.952	5.77002
A0A024RBR4	Huntingtin interacting protein 1 related, isoform CRA_a OS=Homo sapiens GN=HIP1R PE=4 SV=1 - [A0A024RBR4_HUMAN]					14.2952	7.64	5	5	7.36534	5.96	4	4	9.77178	4.27	3	3	890	99.0292	6.0874
Q9P1N1	Nuclear autoantigenic sperm protein (Histone-binding), isoform CRA_b OS=Homo sapiens GN=NASP PE=2 SV=1 - [Q9P1N1_HUMAN]									6.8649	15.09	3	4	9.65764	11.95	2	3	318	34.9848	4.44971
P26373	60S ribosomal protein L13 OS=Homo sapiens GN=RPL13 PE=1 SV=4 - [RL13_HUMAN]	12.4951	28.44	5	6					6.06989	18.96	4	4	3.99638	9.48	2	2	211	24.2465	11.6489
Q9NVI7-2	Isoform 2 of ATPase family AAA domain-containing protein 3A OS=Homo sapiens GN=ATAD3A - [ATD3A_HUMAN]	4.82481	7.17	3	3	14.5456	10.92	4	4	10.9812	6.31	3	4	8.43396	5.8	2	2	586	66.1772	9.24658
B2R7B5	cDNA, FLJ93365, highly similar to Homo sapiens KH domain containing, RNA binding, signal transduction associated 1 (KHDRBS1), mRNA OS=Homo sapiens PE=2 SV=1 - [B2R7B5_HUMAN]	7.2932	8.8	3	3					7.31787	14.67	3	4	5.5413	11.51	2	2	443	48.1952	8.66064
B4DF00	cDNA FLJ53308, highly similar to 2-oxoglutarate dehydrogenase E1 component, mitochondrial (EC 1.2.4.2) OS=Homo sapiens PE=2 SV=1 - [B4DF00_HUMAN]	4.22771	4.21	3	3	8.4744	3.49	3	3	10.0759	5.85	4	4	9.30524	3.8	2	2	974	110.456	6.90283
O15143	Actin-related protein 2/3 complex subunit 1B OS=Homo sapiens GN=ARPC1B PE=1 SV=3 - [ARC1B_HUMAN]	7.04553	8.33	2	2	18.2048	8.33	2	4	13.9298	11.02	3	4	8.91951	8.33	2	2	372	40.9234	8.35303
P62333	26S protease regulatory subunit 10B OS=Homo sapiens GN=PSMC6 PE=1 SV=1 - [PRS10_HUMAN]	5.38301	11.57	2	2					9.19271	11.57	2	4	6.59448	11.05	2	2	389	44.1451	7.48877
B3KTM6	Ribosomal protein L5, isoform CRA_b OS=Homo sapiens GN=RPL5 PE=2 SV=1 - [B3KTM6_HUMAN]	5.05764	10.53	2	2	13.9452	16.19	3	4	11.6733	16.19	3	4	6.34542	10.53	2	2	247	28.0262	9.12939
Q01844-6	Isoform 6 of RNA-binding protein EWS OS=Homo sapiens GN=EWSR1 - [EWS_HUMAN]	4.60157	6.5	2	2					12.0444	8.83	3	4	7.08901	6.5	2	2	600	62.469	9.39307
E9PBS1	Multifunctional protein ADE2 (Fragment) OS=Homo sapiens GN=PAICS PE=1 SV=1 - [E9PBS1_HUMAN]	4.37227	6.54	2	2	8.50451	8.96	3	3	9.88571	10.17	4	4	7.30683	8.72	2	2	413	45.6224	6.68311
H7BZJ3	Protein disulfide-isomerase A3 (Fragment) OS=Homo sapiens GN=PDIA3 PE=1 SV=1 - [H7BZJ3_HUMAN]	4.74981	20.33	2	2	8.38405	28.46	3	3	10.8623	39.84	4	4	7.17688	21.14	2	2	123	13.5108	7.29834
Q9C0B5-2	Isoform 2 of Palmitoyltransferase ZDHHC5 OS=Homo sapiens GN=ZDHHC5 - [ZDHC5_HUMAN]					5.91156	4.83	2	2	8.67751	8.01	3	4	7.67002	5.59	2	2	662	71.9071	8.89502
D3DTY9	Tripartite motif-containing 25, isoform CRA_a OS=Homo sapiens GN=TRIM25 PE=4 SV=1 - [D3DTY9_HUMAN]					5.62904	4.74	2	2	10.9299	11.85	3	4	6.8654	7.82	2	2	422	47.8447	9.0708
Q9BSV4	SFPQ protein (Fragment) OS=Homo sapiens GN=SFPQ PE=2 SV=2 - [Q9BSV4_HUMAN]					8.13084	4.26	2	2	10.8054	9.15	4	4	6.74699	4.26	2	2	634	68.5879	8.82178
Q59FS7	DEAD (Asp-Glu-Ala-Asp) box polypeptide 24 variant (Fragment) OS=Homo sapiens PE=2 SV=1 - [Q59FS7_HUMAN]					12.7109	10.21	3	3	13.3888	11.39	4	4	8.60022	8.58	2	2	676	75.0011	8.45557
O60832	H/ACA ribonucleoprotein complex subunit 4 OS=Homo sapiens GN=DKC1 PE=1 SV=3 - [DKC1_HUMAN]									8.4202	9.53	4	4	4.71663	3.5	2	2	514	57.6378	9.42236
P36543-2	Isoform 2 of V-type proton ATPase subunit E 1 OS=Homo sapiens GN=ATP6V1E1 - [VATE1_HUMAN]									7.08202	17.16	3	4	6.52363	12.25	2	2	204	23.5725	8.98291
Q15233-2	Isoform 2 of Non-POU domain-containing octamer-binding protein OS=Homo sapiens GN=NONO - [NONO_HUMAN]									9.78144	15.97	4	4	7.44602	9.42	2	2	382	43.8381	8.63135
B4DJ75	Serine/threonine-protein phosphatase OS=Homo sapiens PE=2 SV=1 - [B4DJ75_HUMAN]									8.32744	15.05	4	4	2.75505	9.7	2	2	299	34.099	6.16357
P01876	Ig alpha-1 chain C region OS=Homo sapiens GN=IGHA1 PE=1 SV=2 - [IGHA1_HUMAN]	34.7653	22.95	8	14					7.6649	13.6	4	4					353	37.6306	6.50732
	>sp|CATD_HUMAN|	8.82921	13.59	5	5					3.87888	9.22	4	4					412	44.5236	6.53662
P19961-2	Isoform 2 of Alpha-amylase 2B OS=Homo sapiens GN=AMY2B - [AMY2B_HUMAN]	11.3726	11.89	3	4					10.1913	11.89	3	4					370	41.9945	8.14795
Q6UWP8	Suprabasin OS=Homo sapiens GN=SBSN PE=2 SV=2 - [SBSN_HUMAN]	9.71486	15.25	2	4					12.7598	18.31	3	4					590	60.5046	7.00537
B2R659	cDNA, FLJ92803, highly similar to Homo sapiens hydroxysteroid (17-beta) dehydrogenase 4 (HSD17B4), mRNA OS=Homo sapiens PE=2 SV=1 - [B2R659_HUMAN]	7.48062	6.66	3	3					11.9112	8.15	4	4					736	79.5623	8.89502
P62753	40S ribosomal protein S6 OS=Homo sapiens GN=RPS6 PE=1 SV=1 - [RS6_HUMAN]	5.48029	6.43	2	2					10.2422	15.66	4	4					249	28.663	10.8433
O43290	U4/U6.U5 tri-snRNP-associated protein 1 OS=Homo sapiens GN=SART1 PE=1 SV=1 - [SNUT1_HUMAN]					7.29893	4.88	2	2	10.1891	8.63	4	4					800	90.2003	6.12549
Q96RR1-3	Isoform 3 of Twinkle protein, mitochondrial OS=Homo sapiens GN=PEO1 - [PEO1_HUMAN]									9.18248	7.34	2	4					531	60.3622	8.33838
Q9C0J8	pre-mRNA 3' end processing protein WDR33 OS=Homo sapiens GN=WDR33 PE=1 SV=2 - [WDR33_HUMAN]									8.49782	5.31	3	4					1336	145.799	9.17334
P00390-5	Isoform 4 of Glutathione reductase, mitochondrial OS=Homo sapiens GN=GSR - [GSHR_HUMAN]									11.4665	15.23	3	4					440	47.2372	8.74854
B3KN45	cDNA FLJ13521 fis, clone PLACE1005876, highly similar to Cleavage and polyadenylation specificity factor 100 kDa subunit OS=Homo sapiens PE=2 SV=1 - [B3KN45_HUMAN]									11.8586	10	4	4					690	78.1424	5.07178
B2RDG9	cDNA, FLJ96603, highly similar to Homo sapiens actin-related protein 10 homolog (S. cerevisiae) (ACTR10), mRNA OS=Homo sapiens PE=2 SV=1 - [B2RDG9_HUMAN]									8.04725	15.11	4	4					417	46.2473	7.62061
Q59H57	Fusion (Involved in t(12;16) in malignant liposarcoma) isoform a variant (Fragment) OS=Homo sapiens PE=2 SV=1 - [Q59H57_HUMAN]									7.68177	12.67	2	4					300	31.9743	9.5249
B4E0E1	cDNA FLJ53442, highly similar to Poly (ADP-ribose) polymerase 1 (EC 2.4.2.30) OS=Homo sapiens PE=2 SV=1 - [B4E0E1_HUMAN]									9.76188	4.93	3	4					993	111.056	8.86572
B3KTM1	Malate dehydrogenase OS=Homo sapiens PE=2 SV=1 - [B3KTM1_HUMAN]									9.82333	16.02	3	4					231	24.6408	7.98682
B7Z8Y3	cDNA FLJ61696, highly similar to Double-stranded RNA-specific adenosine deaminase (EC 3.5.4.-) OS=Homo sapiens PE=2 SV=1 - [B7Z8Y3_HUMAN]									4.53257	6.7	4	4					970	106.949	7.86963
J3QT54	Cleavage and polyadenylation-specificity factor subunit 7 (Fragment) OS=Homo sapiens GN=CPSF7 PE=1 SV=4 - [J3QT54_HUMAN]									7.28459	22.55	4	4					204	22.6063	4.99561
E9PMR6	Rho guanine nucleotide exchange factor 12 OS=Homo sapiens GN=ARHGEF12 PE=1 SV=1 - [E9PMR6_HUMAN]	4.0087	1.67	2	2	40.1993	14.5	10	11	7.38439	3.33	3	3	31.5409	10.9	8	10	1441	161.808	5.65576
Q14643-4	Isoform 4 of Inositol 1,4,5-trisphosphate receptor type 1 OS=Homo sapiens GN=ITPR1 - [ITPR1_HUMAN]					13.0384	2.37	5	5	5.13361	1.52	3	3	16.9998	2.86	7	8	2695	306.578	6.29053
C9J406	MICOS complex subunit MIC60 OS=Homo sapiens GN=IMMT PE=1 SV=1 - [C9J406_HUMAN]					12.3702	8.04	4	4	7.58586	3.95	3	3	24.6153	17.75	7	7	659	73.209	6.07471
Q6P0M4	IARS protein OS=Homo sapiens GN=IARS PE=2 SV=1 - [Q6P0M4_HUMAN]	7.01643	3.41	3	3	15.818	6.64	5	5	6.85105	3.98	3	3	19.6962	6.16	5	6	1055	120.55	6.12549
Q59HB8	Nuclear mitotic apparatus protein 1 variant (Fragment) OS=Homo sapiens PE=2 SV=1 - [Q59HB8_HUMAN]					17.3366	4.35	5	5	8.72707	2.84	3	3	22.4486	6.31	6	6	1585	177.975	6.32861
B2R858	cDNA, FLJ93750, Homo sapiens DEAD (Asp-Glu-Ala-Asp) box polypeptide 6 (DDX6), mRNA OS=Homo sapiens PE=2 SV=1 - [B2R858_HUMAN]									9.59179	9.11	2	3	10.4092	15.04	3	6	472	53.1827	8.66064
P28289-2	Isoform 2 of Tropomodulin-1 OS=Homo sapiens GN=TMOD1 - [TMOD1_HUMAN]	9.99105	25	3	3	6.63364	11.21	2	2	8.61225	25	3	3	18.6122	30.6	4	5	232	25.9975	8.77783
B2RBR9	cDNA, FLJ95650, highly similar to Homo sapiens karyopherin (importin) beta 1 (KPNB1), mRNA OS=Homo sapiens PE=2 SV=1 - [B2RBR9_HUMAN]	1.84585	3.2	2	2	12.0738	4.91	4	4	7.49058	4.34	3	3	12.0762	6.51	4	5	876	97.122	4.77979
Q9Y6G9	Cytoplasmic dynein 1 light intermediate chain 1 OS=Homo sapiens GN=DYNC1LI1 PE=1 SV=3 - [DC1L1_HUMAN]					17.4323	15.3	4	5	9.04679	7.07	3	3	19.2878	15.11	4	5	523	56.544	6.41748
Q96HP0	Dedicator of cytokinesis protein 6 OS=Homo sapiens GN=DOCK6 PE=1 SV=3 - [DOCK6_HUMAN]					21.5382	3.03	5	6	6.83441	2	3	3	14.4051	3.27	5	5	2047	229.414	6.7417
P20592	Interferon-induced GTP-binding protein Mx2 OS=Homo sapiens GN=MX2 PE=1 SV=1 - [MX2_HUMAN]					19.7052	7.13	3	5	5.35415	5.59	3	3	17.8317	8.81	4	5	715	82.0367	8.76318
Q9BYK8	Helicase with zinc finger domain 2 OS=Homo sapiens GN=HELZ2 PE=1 SV=6 - [HELZ2_HUMAN]					18.9183	2.72	5	6	6.98169	1.59	3	3	16.385	2.98	5	5	2649	294.465	7.48877
D6RGI3	Septin 11, isoform CRA_b OS=Homo sapiens GN=SEPT11 PE=1 SV=1 - [D6RGI3_HUMAN]					14.4621	8.71	4	5	3.87245	4.71	2	3	13.6931	9.41	4	5	425	48.9751	6.96143
B2RE34	cDNA, FLJ96901, highly similar to Homo sapiens Rac GTPase activating protein 1 (RACGAP1), mRNA OS=Homo sapiens PE=2 SV=1 - [B2RE34_HUMAN]					20.2661	11.87	5	6	10.7334	6.65	2	3	17.1665	10.6	4	5	632	70.9238	8.95361
P46939	Utrophin OS=Homo sapiens GN=UTRN PE=1 SV=2 - [UTRO_HUMAN]									6.4088	1.19	3	3	14.1387	2.01	5	5	3433	394.22	5.32568
B4DRW1	cDNA FLJ55805, highly similar to Keratin, type II cytoskeletal 4 OS=Homo sapiens PE=2 SV=1 - [B4DRW1_HUMAN]	19.9563	18.14	7	8	7.98869	5.91	4	4	6.53185	4.22	2	3	9.37816	4.43	3	4	474	51.7272	6.81494
P81605	Dermcidin OS=Homo sapiens GN=DCD PE=1 SV=2 - [DCD_HUMAN]	12.9369	22.73	3	4	15.1353	22.73	3	4	9.98974	12.73	2	3	15.7405	22.73	3	4	110	11.2768	6.53662
Q8N7R7-3	Isoform 3 of Cyclin-Y-like protein 1 OS=Homo sapiens GN=CCNYL1 - [CCYL1_HUMAN]	3.79361	9	3	3	4.91114	5.88	2	2	5.04585	10.73	3	3	9.48326	13.49	4	4	289	33.431	6.93213
Q6PJ61	F-box only protein 46 OS=Homo sapiens GN=FBXO46 PE=1 SV=3 - [FBX46_HUMAN]	9.99882	9.45	2	3	8.25367	11.44	3	3	9.65503	11.61	3	3	7.90867	11.44	3	4	603	64.5901	7.40088
O00299	Chloride intracellular channel protein 1 OS=Homo sapiens GN=CLIC1 PE=1 SV=4 - [CLIC1_HUMAN]	5.69968	18.67	2	2	17.7662	28.63	4	5	8.51056	24.07	3	3	14.3163	28.63	4	4	241	26.9057	5.17334
P53621	Coatomer subunit alpha OS=Homo sapiens GN=COPA PE=1 SV=2 - [COPA_HUMAN]	5.42032	2.61	2	2	24.1221	5.64	6	8	4.71623	2.7	3	3	14.0755	4.9	4	4	1224	138.258	7.66455
P35613-3	Isoform 3 of Basigin OS=Homo sapiens GN=BSG - [BASI_HUMAN]	5.25905	15.34	2	2	4.28572	10.8	2	2	5.36502	23.3	3	3	13.605	24.43	3	4	176	19.4258	6.68311
Q8IWE4	DCN1-like protein 3 OS=Homo sapiens GN=DCUN1D3 PE=1 SV=1 - [DCNL3_HUMAN]					9.78695	14.8	3	3	4.25315	11.51	3	3	9.31535	14.14	4	4	304	34.2696	5.12256
A6NDB9	Paralemmin-3 OS=Homo sapiens GN=PALM3 PE=1 SV=2 - [PALM3_HUMAN]					30.2422	18.28	6	8	6.10571	6.54	3	3	10.2905	6.98	3	4	673	71.6522	4.52588
Q5H924	HECT, UBA and WWE domain containing 1 (Fragment) OS=Homo sapiens GN=HUWE1 PE=4 SV=1 - [Q5H924_HUMAN]					15.3855	2.05	4	4	6.43166	1.7	3	3	14.5298	1.97	3	4	3407	373.963	5.09717
B4DXT2	cDNA FLJ59635, highly similar to Heat shock 70 kDa protein 4L OS=Homo sapiens PE=2 SV=1 - [B4DXT2_HUMAN]					17.4854	9.35	6	6	7.1981	4.67	3	3	9.95164	5.29	4	4	813	91.8814	6.0874
P10301	Ras-related protein R-Ras OS=Homo sapiens GN=RRAS PE=1 SV=1 - [RRAS_HUMAN]									5.15888	21.56	3	3	13.1894	17.89	3	4	218	23.4659	6.93213
B4DHN5	Syntenin-1 OS=Homo sapiens GN=SDCBP PE=2 SV=1 - [B4DHN5_HUMAN]									8.80724	15.48	2	3	17.2946	20.08	3	4	239	25.9514	6.63916
B4E3S0	Coronin OS=Homo sapiens GN=CORO1C PE=2 SV=1 - [B4E3S0_HUMAN]	8.25121	10.03	3	3					7.26875	10.3	3	3	10.049	12.2	3	3	369	41.5773	6.72705
B4E2Z3	cDNA FLJ54090, highly similar to 4F2 cell-surface antigen heavy chain OS=Homo sapiens PE=2 SV=1 - [B4E2Z3_HUMAN]	9.28739	7.24	3	3	5.6558	5.68	2	2	7.62313	5.68	2	3	10.1775	10.57	3	3	511	55.9047	5.17334
C9JXB8	60S ribosomal protein L24 OS=Homo sapiens GN=RPL24 PE=1 SV=1 - [C9JXB8_HUMAN]	8.26998	18.18	2	3					8.40531	17.36	2	3	7.8055	24.79	3	3	121	14.3598	11.312
A0A024R7P5	Similar to Laminin receptor 1, isoform CRA_a OS=Homo sapiens GN=LOC388524 PE=3 SV=1 - [A0A024R7P5_HUMAN]	8.52456	15.08	2	3	12.9928	24.62	4	4	7.62828	19.1	3	3	10.5051	19.1	3	3	199	22.0005	8.82178
Q5TC63	Growth hormone-regulated TBC protein 1 OS=Homo sapiens GN=GRTP1 PE=1 SV=4 - [GRTP1_HUMAN]	4.59078	5.95	2	2					6.50405	10.42	3	3	9.53345	10.42	3	3	336	38.5291	8.77783
O00487	26S proteasome non-ATPase regulatory subunit 14 OS=Homo sapiens GN=PSMD14 PE=1 SV=1 - [PSDE_HUMAN]	4.77798	6.45	2	2	18.3807	20	4	5	5.74203	14.84	3	3	10.5411	15.81	3	3	310	34.5546	6.52197
Q9UPN4-3	Isoform 3 of Centrosomal protein of 131 kDa OS=Homo sapiens GN=CEP131 - [CP131_HUMAN]					22.9672	7.85	6	7	6.66992	3.26	2	3	9.26132	3.26	2	3	1044	117.326	8.77783
Q96ST8	Centrosomal protein of 89 kDa OS=Homo sapiens GN=CEP89 PE=1 SV=3 - [CEP89_HUMAN]					5.68567	2.68	2	2	4.91793	6.9	3	3	10.7695	3.32	2	3	783	89.5344	6.80029
Q13162	Peroxiredoxin-4 OS=Homo sapiens GN=PRDX4 PE=1 SV=1 - [PRDX4_HUMAN]					5.05493	8.49	2	3	4.23923	8.86	3	3	8.07149	8.49	3	3	271	30.5208	6.29053
P25787	Proteasome subunit alpha type-2 OS=Homo sapiens GN=PSMA2 PE=1 SV=2 - [PSA2_HUMAN]					5.38677	8.97	2	2	4.43809	17.95	3	3	12.7719	23.93	3	3	234	25.8823	7.43018
P21796	Voltage-dependent anion-selective channel protein 1 OS=Homo sapiens GN=VDAC1 PE=1 SV=2 - [VDAC1_HUMAN]					8.14223	14.49	2	2	8.90874	22.61	3	3	10.7089	20.14	3	3	283	30.7536	8.54346
A6NNN6	Pericentriolar material 1 protein OS=Homo sapiens GN=PCM1 PE=4 SV=5 - [A6NNN6_HUMAN]					20.8383	3.49	5	7	7.64212	2.26	3	3	11.2403	2.47	2	3	1860	210.003	4.99561
Q5H909	Melanoma-associated antigen D2 OS=Homo sapiens GN=MAGED2 PE=1 SV=2 - [Q5H909_HUMAN]					9.17212	7.82	2	2	5.8444	5.44	2	3	7.54562	13.61	3	3	588	63.1004	9.34912
E1NZA1	Peroxisome proliferator activated receptor interacting complex protein OS=Homo sapiens GN=PRIC295 PE=2 SV=1 - [E1NZA1_HUMAN]					10.5729	1.8	4	4	2.73555	1.01	3	3	8.89908	1.31	3	3	2671	292.558	7.43018
Q13425-2	Isoform 2 of Beta-2-syntrophin OS=Homo sapiens GN=SNTB2 - [SNTB2_HUMAN]									5.2573	19.85	3	3	9.78953	21.72	3	3	267	27.6596	9.86182
B3KRY5	cDNA FLJ35087 fis, clone PLACE6005546, highly similar to Polymerase I and transcript release factor OS=Homo sapiens PE=2 SV=1 - [B3KRY5_HUMAN]									7.95732	15.36	3	3	8.95525	11.3	3	3	345	39.0216	6.50732
A8K4G7	cDNA FLJ78528, highly similar to Homo sapiens vacuolar protein sorting 4B (yeast) (VPS4B), mRNA OS=Homo sapiens PE=2 SV=1 - [A8K4G7_HUMAN]									2.72839	9.01	3	3	5.02404	9.01	3	3	444	49.2424	6.75635
Q4G140	MYH11 protein OS=Homo sapiens GN=MYH11 PE=2 SV=1 - [Q4G140_HUMAN]									2.90226	15.32	2	3	9.10949	15.32	2	3	222	24.9606	7.02002
O15144	Actin-related protein 2/3 complex subunit 2 OS=Homo sapiens GN=ARPC2 PE=1 SV=1 - [ARPC2_HUMAN]	7.05697	14.67	4	4	5.9156	7.67	2	2	7.23228	11.67	3	3	6.20908	7.67	2	2	300	34.3115	7.35693
Q9NR12	PDZ and LIM domain protein 7 OS=Homo sapiens GN=PDLIM7 PE=1 SV=1 - [PDLI7_HUMAN]	10.2051	15.54	4	4					7.1878	8.75	3	3	5.84819	11.6	2	2	457	49.8126	8.41162
Q16543	Hsp90 co-chaperone Cdc37 OS=Homo sapiens GN=CDC37 PE=1 SV=1 - [CDC37_HUMAN]	7.1636	14.29	3	3	12.0312	14.02	4	4	5.84646	16.93	3	3	7.83933	11.38	2	2	378	44.44	5.24951
P12830-2	Isoform 2 of Cadherin-1 OS=Homo sapiens GN=CDH1 - [CADH1_HUMAN]	8.36192	5.72	3	3	10.0407	4.75	3	3	5.13268	4.63	2	3	4.9738	2.56	2	2	821	90.8856	4.75439
E7ENQ1	Mitogen-activated protein kinase kinase kinase kinase 4 OS=Homo sapiens GN=MAP4K4 PE=1 SV=1 - [E7ENQ1_HUMAN]	1.80664	1.65	2	2	6.54582	3.21	2	2	1.72307	5.29	3	3	5.79806	2.86	2	2	1154	132.084	7.53271
B4DMV0	cDNA FLJ59352, highly similar to Brain-specific angiogenesis inhibitor1-associated protein 2 OS=Homo sapiens PE=2 SV=1 - [B4DMV0_HUMAN]	4.77642	8	2	2	15.4676	12.2	4	4	7.45443	9	3	3	7.71987	6.8	2	2	500	54.7676	9.17334
P28838-2	Isoform 2 of Cytosol aminopeptidase OS=Homo sapiens GN=LAP3 - [AMPL_HUMAN]					6.21455	5.53	2	2	7.30367	8.2	3	3	5.53015	5.33	2	2	488	52.7379	6.7417
P16615-2	Isoform 2 of Sarcoplasmic/endoplasmic reticulum calcium ATPase 2 OS=Homo sapiens GN=ATP2A2 - [AT2A2_HUMAN]					9.4577	4.21	3	3	7.02511	4.31	3	3	5.72548	3.21	2	2	997	109.62	5.36377
Q8WU20	Fibroblast growth factor receptor substrate 2 OS=Homo sapiens GN=FRS2 PE=1 SV=4 - [FRS2_HUMAN]					22.2032	15.55	5	6	11.1519	12.8	3	3	7.00484	10.63	2	2	508	56.9941	5.96045
Q96I24	Far upstream element-binding protein 3 OS=Homo sapiens GN=FUBP3 PE=1 SV=2 - [FUBP3_HUMAN]					9.904	7.52	4	4	4.41581	4.55	2	3	4.54082	3.32	2	2	572	61.6022	8.38232
P62136	Serine/threonine-protein phosphatase PP1-alpha catalytic subunit OS=Homo sapiens GN=PPP1CA PE=1 SV=1 - [PP1A_HUMAN]					8.77605	11.21	3	3	4.69836	13.03	3	3	5.01211	8.18	2	2	330	37.4878	6.32861
O43581	Synaptotagmin-7 OS=Homo sapiens GN=SYT7 PE=1 SV=3 - [SYT7_HUMAN]					7.47275	8.19	2	2	8.08052	12.16	3	3	6.79544	7.69	2	2	403	45.4726	9.21729
B4DJ66	Proteasome (Prosome, macropain) 26S subunit, non-ATPase, 13, isoform CRA_d OS=Homo sapiens GN=PSMD13 PE=2 SV=1 - [B4DJ66_HUMAN]					6.07636	8.36	2	2	7.46441	8.68	2	3	5.78473	8.36	2	2	311	35.3244	6.01123
Q14669-4	Isoform 4 of E3 ubiquitin-protein ligase TRIP12 OS=Homo sapiens GN=TRIP12 - [TRIPC_HUMAN]					11.4877	2.79	3	3	7.64526	2.26	3	3	5.30357	1.8	2	2	1722	191.954	6.49365
B3KW56	Eukaryotic translation initiation factor 3 subunit E OS=Homo sapiens GN=EIF3S6 PE=2 SV=1 - [B3KW56_HUMAN]					12.6734	10.1	3	6	7.6211	8.33	2	3	7.51993	7.83	2	2	396	46.4154	6.45557
Q86TY2	Full-length cDNA clone CS0DI035YL21 of Placenta of Homo sapiens (human) (Fragment) OS=Homo sapiens PE=2 SV=1 - [Q86TY2_HUMAN]					6.98928	11.96	2	2	5.61074	16.94	3	3	7.21285	11.96	2	2	301	33.1802	5.51611
B2R6F5	Protein XRP2 OS=Homo sapiens PE=2 SV=1 - [B2R6F5_HUMAN]					4.09531	5.14	2	2	6.12186	6.86	2	3	4.58494	5.14	2	2	350	39.5994	5.12256
B4DW90	cDNA FLJ58737, highly similar to Splicing factor 3A subunit 3 OS=Homo sapiens PE=2 SV=1 - [B4DW90_HUMAN]					6.74538	7.14	2	2	7.82426	11.83	3	3	6.88207	7.14	2	2	448	52.3951	5.2749
A0A076N408	Truncated KIDINS220 isoform h3 (Fragment) OS=Homo sapiens GN=KIDINS220 PE=2 SV=1 - [A0A076N408_HUMAN]					9.7379	8	2	2	2.72666	11.23	3	3	8.39418	8	2	2	650	71.0347	5.69385
Q4ZG57	Putative uncharacterized protein MCM6 (Fragment) OS=Homo sapiens GN=MCM6 PE=3 SV=1 - [Q4ZG57_HUMAN]									7.21347	4.2	3	3	5.08147	2.42	2	2	785	88.8903	5.60498
Q59GY3	Arginine/serine-rich splicing factor 6 variant (Fragment) OS=Homo sapiens PE=2 SV=1 - [Q59GY3_HUMAN]									7.26527	12.9	3	3	5.18898	7.89	2	2	279	31.8461	10.9458
B0AZS5	Kinesin-like protein OS=Homo sapiens PE=2 SV=1 - [B0AZS5_HUMAN]									5.69189	6.82	3	3	5.63649	4.39	2	2	660	74.9821	6.40479
P01877	Ig alpha-2 chain C region OS=Homo sapiens GN=IGHA2 PE=1 SV=3 - [IGHA2_HUMAN]	28.0195	17.65	6	11					6.5127	11.47	3	3					340	36.503	6.1001
P25311	Zinc-alpha-2-glycoprotein OS=Homo sapiens GN=AZGP1 PE=1 SV=2 - [ZA2G_HUMAN]	18.9213	35.57	8	10					8.41192	14.77	3	3					298	34.2371	6.04932
Q08554-2	Isoform 1B of Desmocollin-1 OS=Homo sapiens GN=DSC1 - [DSC1_HUMAN]	19.117	5.71	4	8					8.73206	3.57	2	3					840	93.776	5.52881
P13674	Prolyl 4-hydroxylase subunit alpha-1 OS=Homo sapiens GN=P4HA1 PE=1 SV=2 - [P4HA1_HUMAN]	18.4474	15.92	7	7					4.38872	7.3	3	3					534	61.011	6.01123
P13674-2	Isoform 2 of Prolyl 4-hydroxylase subunit alpha-1 OS=Homo sapiens GN=P4HA1 - [P4HA1_HUMAN]	18.375	15.92	7	7					4.38872	7.3	3	3					534	60.9289	6.01123
C3PTT6	Pancreatic adenocarcinoma upregulated factor OS=Homo sapiens GN=PAUF PE=1 SV=1 - [C3PTT6_HUMAN]	13.7599	27.55	4	5					8.0433	15.31	2	3					196	21.553	7.38623
B4E0N9	Glutamate dehydrogenase OS=Homo sapiens PE=2 SV=1 - [B4E0N9_HUMAN]	13.0129	6.94	3	5					7.38619	8.57	3	3					490	54.2245	7.57666
P01040	Cystatin-A OS=Homo sapiens GN=CSTA PE=1 SV=1 - [CYTA_HUMAN]	7.69735	54.08	4	4					8.26049	44.9	3	3					98	10.9997	5.50342
Q8IXJ3	Small nuclear ribonucleoprotein component OS=Homo sapiens GN=SNRP116 PE=2 SV=1 - [Q8IXJ3_HUMAN]	5.06538	4.59	3	3	5.94528	2.71	2	2	7.52801	4.12	3	3					850	95.311	6.02393
A8K2Y2	cDNA FLJ78120, highly similar to Homo sapiens eukaryotic translation initiation factor 2, subunit 3 gamma, 52kDa (EIF2S3), mRNA OS=Homo sapiens PE=2 SV=1 - [A8K2Y2_HUMAN]	7.40353	9.11	3	3					6.98168	8.26	3	3					472	51.0782	8.27979
	>sp|GSTP1_HUMAN|	5.6335	12.92	2	2					8.18849	12.92	2	3					209	23.21	5.64307
Q86V81	THO complex subunit 4 OS=Homo sapiens GN=ALYREF PE=1 SV=3 - [THOC4_HUMAN]	5.2327	11.28	2	2					10.4954	11.28	2	3					257	26.8716	11.1509
D6RAF8	Heterogeneous nuclear ribonucleoprotein D0 (Fragment) OS=Homo sapiens GN=HNRNPD PE=1 SV=1 - [D6RAF8_HUMAN]	2.4585	12.22	2	2					4.67623	20.36	3	3					221	23.0622	5.10986
Q8J015	60S ribosomal protein L13a OS=Homo sapiens GN=RPL13a PE=1 SV=1 - [Q8J015_HUMAN]	4.46894	14.79	2	2					6.39527	20.42	3	3					142	16.7204	10.814
Q5JQ13	Vinculin (Fragment) OS=Homo sapiens GN=VCL PE=1 SV=1 - [Q5JQ13_HUMAN]	5.14167	4.84	2	2					8.3231	6.2	2	3					806	87.39	5.8208
B3KW79	cDNA FLJ42481 fis, clone BRACE2032090, highly similar to Probable serine carboxypeptidase CPVL (EC 3.4.16.-) OS=Homo sapiens PE=2 SV=1 - [B3KW79_HUMAN]	3.96681	3.99	2	2					2.51512	6.72	3	3					476	54.1381	5.60498
B4DLP4	Ribosomal protein L15 OS=Homo sapiens PE=2 SV=1 - [B4DLP4_HUMAN]	3.81473	9.76	2	2					3.30413	19.51	3	3					164	19.3266	11.9272
Q13131	5'-AMP-activated protein kinase catalytic subunit alpha-1 OS=Homo sapiens GN=PRKAA1 PE=1 SV=4 - [AAPK1_HUMAN]					4.56217	3.22	2	2	3.98448	5.01	3	3					559	63.9686	8.11865
Q9Y2X3	Nucleolar protein 58 OS=Homo sapiens GN=NOP58 PE=1 SV=1 - [NOP58_HUMAN]					6.47751	5.29	2	2	7.4842	7.56	3	3					529	59.5405	8.92432
Q9HAC8	Ubiquitin domain-containing protein 1 OS=Homo sapiens GN=UBTD1 PE=1 SV=1 - [UBTD1_HUMAN]					5.83172	11.01	2	2	1.98782	7.93	2	3					227	25.9223	7.82568
P46459-2	Isoform 2 of Vesicle-fusing ATPase OS=Homo sapiens GN=NSF - [NSF_HUMAN]					14.6544	6.83	4	5	7.54954	5.43	3	3					644	71.5386	6.65381
P39656-2	Isoform 2 of Dolichyl-diphosphooligosaccharide--protein glycosyltransferase 48 kDa subunit OS=Homo sapiens GN=DDOST - [OST48_HUMAN]					5.63423	4.77	2	2	7.70849	8.83	3	3					419	46.5479	7.29834
J3QLL0	Importin subunit alpha-1 (Fragment) OS=Homo sapiens GN=KPNA2 PE=1 SV=1 - [J3QLL0_HUMAN]					12.823	37.31	3	3	9.25574	26.12	2	3					134	15.2249	10.2134
B9EIS5	PCM1 protein OS=Homo sapiens GN=PCM1 PE=2 SV=1 - [B9EIS5_HUMAN]					28.7454	4.12	6	9	7.64212	2.08	3	3					2016	227.532	5.03369
F8VUA7	Oxysterol-binding protein (Fragment) OS=Homo sapiens GN=OSBPL8 PE=1 SV=4 - [F8VUA7_HUMAN]					6.11499	5.33	2	2	7.42297	6.92	3	3					694	79.0039	6.771
A0A087WXD2	Membrane-associated guanylate kinase, WW and PDZ domain-containing protein 1 OS=Homo sapiens GN=MAGI1 PE=1 SV=1 - [A0A087WXD2_HUMAN]					7.13123	3.78	2	2	7.89754	5.61	3	3					980	106.832	6.45557
Q7L2E3-3	Isoform 3 of Putative ATP-dependent RNA helicase DHX30 OS=Homo sapiens GN=DHX30 - [DHX30_HUMAN]									7.05118	2.51	3	3					1155	129.357	8.52881
Q9HCM4-2	Isoform 2 of Band 4.1-like protein 5 OS=Homo sapiens GN=EPB41L5 - [E41L5_HUMAN]									8.31052	9.11	2	3					505	57.8494	9.1001
Q12929	Epidermal growth factor receptor kinase substrate 8 OS=Homo sapiens GN=EPS8 PE=1 SV=1 - [EPS8_HUMAN]									8.73348	5.47	3	3					822	91.8244	7.50342
Q9NZB2-2	Isoform B of Constitutive coactivator of PPAR-gamma-like protein 1 OS=Homo sapiens GN=FAM120A - [F120A_HUMAN]									5.1	5.25	2	3					628	68.9486	7.88428
Q01650	Large neutral amino acids transporter small subunit 1 OS=Homo sapiens GN=SLC7A5 PE=1 SV=2 - [LAT1_HUMAN]									7.8337	6.71	2	3					507	54.9743	7.72314
Q15646-2	Isoform p30 of 2'-5'-oligoadenylate synthase-like protein OS=Homo sapiens GN=OASL - [OASL_HUMAN]									7.35435	18.82	3	3					255	29.0652	9.29053
Q9P1Y6-2	Isoform 2 of PHD and RING finger domain-containing protein 1 OS=Homo sapiens GN=PHRF1 - [PHRF1_HUMAN]									6.66355	3.35	3	3					1494	161.842	9.0708
A2A3N6	Putative PIP5K1A and PSMD4-like protein OS=Homo sapiens GN=PIPSL PE=5 SV=1 - [PIPSL_HUMAN]									6.21995	4.87	3	3					862	94.9876	5.70654
P28070	Proteasome subunit beta type-4 OS=Homo sapiens GN=PSMB4 PE=1 SV=4 - [PSB4_HUMAN]									3.96866	11.36	2	3					264	29.1855	5.97314
Q16698-2	Isoform 2 of 2,4-dienoyl-CoA reductase, mitochondrial OS=Homo sapiens GN=DECR1 - [DECR_HUMAN]									3.91486	11.35	3	3					326	34.9722	8.89502
P48426-2	Isoform 2 of Phosphatidylinositol 5-phosphate 4-kinase type-2 alpha OS=Homo sapiens GN=PIP4K2A - [PI42A_HUMAN]									7.71673	6.63	2	3					347	39.777	6.21436
Q96BS4	FBL protein (Fragment) OS=Homo sapiens GN=FBL PE=1 SV=2 - [Q96BS4_HUMAN]									6.86498	14.62	3	3					260	28.4318	9.42236
B3KVN0	cDNA FLJ16785 fis, clone NT2RI2015342, highly similar to Solute carrier family 2, facilitated glucose transporter member 1 OS=Homo sapiens PE=2 SV=1 - [B3KVN0_HUMAN]									5.14467	6.49	2	3					416	45.8393	8.60205
B2R5U1	cDNA, FLJ92620, highly similar to Homo sapiens staphylococcal nuclease domain containing 1 (SND1),mRNA OS=Homo sapiens PE=2 SV=1 - [B2R5U1_HUMAN]									6.61359	4.52	3	3					885	99.6093	6.96143
B3KX47	cDNA FLJ44733 fis, clone BRACE3026290, highly similar to Lethal(2) giant larvae protein homolog 2 OS=Homo sapiens PE=2 SV=1 - [B3KX47_HUMAN]									6.38794	3.98	3	3					1004	111.048	6.85889
B2R4M6	Protein S100 OS=Homo sapiens PE=2 SV=1 - [B2R4M6_HUMAN]									6.10014	18.42	2	3					114	13.2015	6.12549
A8K3W4	cDNA FLJ75163, highly similar to Homo sapiens heterogeneous nuclear ribonucleoprotein U-like 1 (HNRPUL1), transcript variant 4, mRNA OS=Homo sapiens PE=2 SV=1 - [A8K3W4_HUMAN]									4.8927	5.82	3	3					756	84.7691	8.85107
B4DQR2	cDNA FLJ57562, highly similar to Cleavage and polyadenylation specificityfactor 73 kDa subunit OS=Homo sapiens PE=2 SV=1 - [B4DQR2_HUMAN]									7.64424	6.4	2	3					406	45.8991	5.51611
B4E3E6	cDNA FLJ58832, highly similar to Heterogeneous nuclear ribonucleoprotein A3 OS=Homo sapiens PE=2 SV=1 - [B4E3E6_HUMAN]									8.51714	14.86	3	3					323	34.168	8.104
Q0EFA5	S protein OS=Homo sapiens GN=S PE=4 SV=1 - [Q0EFA5_HUMAN]									7.00606	9.18	2	3					512	49.8655	8.1333
A8K6V7	cDNA FLJ76053, highly similar to Homo sapiens Ras-GTPase activating protein SH3 domain-binding protein 2 (G3BP2), transcript variant 3, mRNA OS=Homo sapiens PE=2 SV=1 - [A8K6V7_HUMAN]									6.74387	8.46	3	3					449	50.7851	5.37646
B2R9U2	cDNA, FLJ94557, highly similar to Homo sapiens FK506 binding protein 4, 59kDa (FKBP4), mRNA OS=Homo sapiens PE=2 SV=1 - [B2R9U2_HUMAN]									7.58514	9.8	3	3					459	51.8021	5.42725
B4DH66	cDNA FLJ59508, highly similar to Homo sapiens ubiquitin associated protein 2 (UBAP2), transcript variant 1, mRNA OS=Homo sapiens PE=2 SV=1 - [B4DH66_HUMAN]									9.0733	5.94	3	3					892	93.6237	7.6499
B5BU77	Protein kinase C eta type OS=Homo sapiens GN=PRKCH PE=2 SV=1 - [B5BU77_HUMAN]									6.51991	6.73	3	3					683	77.762	7.76709
A0A090N8G0	Glycyl-tRNA synthetase OS=Homo sapiens GN=GARS PE=4 SV=1 - [A0A090N8G0_HUMAN]									4.63944	5.26	3	3					685	77.4813	6.23975
A0A0A0MSE4	Nck-associated protein 5 OS=Homo sapiens GN=NCKAP5 PE=4 SV=1 - [A0A0A0MSE4_HUMAN]									2.8238	5.59	2	3					590	66.2608	5.38916
H0YMZ1	Proteasome subunit alpha type (Fragment) OS=Homo sapiens GN=PSMA4 PE=1 SV=4 - [H0YMZ1_HUMAN]									7.59158	10.45	2	3					220	24.5104	6.771
A0A0A0MSG5	SPATS2-like protein OS=Homo sapiens GN=SPATS2L PE=4 SV=1 - [A0A0A0MSG5_HUMAN]									0	9.47	3	3					475	52.3928	9.65674
Q05CW6	PSMD1 protein (Fragment) OS=Homo sapiens GN=PSMD1 PE=2 SV=1 - [Q05CW6_HUMAN]					28.8374	13.43	8	9	4.46073	4.79	2	2	25.8584	10.28	5	7	856	94.6696	7.23975
O00231	26S proteasome non-ATPase regulatory subunit 11 OS=Homo sapiens GN=PSMD11 PE=1 SV=3 - [PSD11_HUMAN]	3.97012	5.92	2	2	7.81148	7.35	3	3	4.9	6.64	2	2	16.6478	17.06	6	6	422	47.434	6.48096
J9R021	Eukaryotic translation initiation factor 3 subunit A OS=Homo sapiens GN=eIF3a PE=2 SV=1 - [J9R021_HUMAN]	5.08465	2.46	2	2	21.2933	5.72	6	7	4.56436	2.24	2	2	16.5047	6.44	6	6	1382	166.381	6.78564
P62070	Ras-related protein R-Ras2 OS=Homo sapiens GN=RRAS2 PE=1 SV=1 - [RRAS2_HUMAN]					12.5746	11.27	2	5	5.22329	11.27	2	2	17.6542	25	4	6	204	23.3847	6.01123
Q5JR95	40S ribosomal protein S8 OS=Homo sapiens GN=RPS8 PE=1 SV=1 - [Q5JR95_HUMAN]	8.5018	24.47	4	4	13.8648	16.49	3	5	3.87001	9.57	2	2	17.3788	24.47	4	5	188	21.866	10.3599
Q7L9B9	Endonuclease/exonuclease/phosphatase family domain-containing protein 1 OS=Homo sapiens GN=EEPD1 PE=1 SV=2 - [EEPD1_HUMAN]	5.95537	4.57	2	2	12.1967	4.57	2	3	5.25632	6.15	2	2	17.3567	11.42	4	5	569	62.364	8.41162
Q8IWZ3	Ankyrin repeat and KH domain-containing protein 1 OS=Homo sapiens GN=ANKHD1 PE=1 SV=1 - [ANKH1_HUMAN]					17.8429	3.66	4	4	6.4572	1.26	2	2	18.8927	3.46	4	5	2542	269.291	5.73193
P55036	26S proteasome non-ATPase regulatory subunit 4 OS=Homo sapiens GN=PSMD4 PE=1 SV=1 - [PSMD4_HUMAN]					13.5554	9.55	3	3	5.81348	11.41	2	2	17.7018	16.18	5	5	377	40.7112	4.79248
Q7Z2W4-2	Isoform 2 of Zinc finger CCCH-type antiviral protein 1 OS=Homo sapiens GN=ZC3HAV1 - [ZCCHV_HUMAN]					11.1304	7.3	3	3	7.29237	6.44	2	2	15.9612	13.73	5	5	699	77.8533	8.38232
A6H8X9	Centrosomal protein 170kDa OS=Homo sapiens GN=CEP170 PE=2 SV=1 - [A6H8X9_HUMAN]					14.282	4.66	4	4	5.53224	3.22	2	2	17.413	6.44	5	5	1460	161.34	7.00537
B3KSC3	cDNA FLJ35987 fis, clone TESTI2014269, highly similar to D-3-phosphoglycerate dehydrogenase (EC 1.1.1.95) OS=Homo sapiens PE=2 SV=1 - [B3KSC3_HUMAN]					8.66024	7.62	3	3	4.40532	4.01	2	2	12.3687	11.42	5	5	499	52.9794	7.12256
E4W6B6	RPL27/NME2 fusion protein (Fragment) OS=Homo sapiens GN=RPL27 PE=2 SV=1 - [E4W6B6_HUMAN]	1.85956	15.08	2	2	7.42356	17.46	3	3	3.59112	13.49	2	2	9.91293	22.22	3	4	126	14.248	10.4624
Q13136-2	Isoform 2 of Liprin-alpha-1 OS=Homo sapiens GN=PPFIA1 - [LIPA1_HUMAN]					4.98514	2.36	2	3	2.81463	4.3	2	2	14.4588	5.99	4	4	1185	133.887	6.25244
Q5T4S7-3	Isoform 3 of E3 ubiquitin-protein ligase UBR4 OS=Homo sapiens GN=UBR4 - [UBR4_HUMAN]					28.7796	2.23	6	7	6.8554	1.18	2	2	20.7602	1.98	4	4	5159	571.489	6.03662
P62195-2	Isoform 2 of 26S protease regulatory subunit 8 OS=Homo sapiens GN=PSMC5 - [PRS8_HUMAN]					12.5506	12.06	4	4	4.33433	6.78	2	2	11.4775	14.32	4	4	398	44.7557	8.17725
Q6PJY1	FUBP1 protein (Fragment) OS=Homo sapiens GN=FUBP1 PE=2 SV=1 - [Q6PJY1_HUMAN]					16.7612	20.72	5	5	5.11624	10.86	2	2	11.7644	15.46	4	4	304	32.0112	8.83643
B4E164	cDNA FLJ56613, highly similar to Serine/threonine-protein kinase TBK1 (EC 2.7.11.1) OS=Homo sapiens PE=2 SV=1 - [B4E164_HUMAN]	9.38801	10.08	3	3	5.71216	5.44	2	2	6.08278	6.65	2	2	10.777	10.08	3	3	496	56.9642	6.771
O14818-2	Isoform 2 of Proteasome subunit alpha type-7 OS=Homo sapiens GN=PSMA7 - [PSA7_HUMAN]	2.53859	16.29	2	2	7.00163	14.61	2	2	5.55395	16.29	2	2	9.75097	22.47	3	3	178	20.1806	8.51416
Q96HX3	Dolichyl-diphosphooligosaccharide--protein glycosyltransferase subunit 1 (Fragment) OS=Homo sapiens PE=2 SV=1 - [Q96HX3_HUMAN]	4.39557	4.75	2	2	6.16473	4.23	2	2	3.19149	4.4	2	2	9.14725	7.04	3	3	568	64.5417	6.55127
Q8IZX9	NKG2D ligand 2 (Fragment) OS=Homo sapiens PE=2 SV=1 - [Q8IZX9_HUMAN]	5.53284	13.3	2	2	7.34785	12.84	3	3	6.20701	13.3	2	2	10.7456	18.35	3	3	218	24.4882	6.37939
A8K6A2	cDNA FLJ77317, highly similar to Homo sapiens retinoblastoma binding protein 7 (RBBP7), mRNA OS=Homo sapiens PE=2 SV=1 - [A8K6A2_HUMAN]	4.12848	3.76	2	2					3.87082	4.94	2	2	6.22994	5.41	3	3	425	47.8082	5.08447
Q92974-3	Isoform 3 of Rho guanine nucleotide exchange factor 2 OS=Homo sapiens GN=ARHGEF2 - [ARHG2_HUMAN]					12.5593	5.11	5	5	3.6657	2.71	2	2	8.47261	4.7	3	3	958	108.175	6.87354
P53618	Coatomer subunit beta OS=Homo sapiens GN=COPB1 PE=1 SV=3 - [COPB_HUMAN]					14.3841	7.03	4	4	5.30205	3.78	2	2	10.2308	4.09	2	3	953	107.074	6.04932
P29317	Ephrin type-A receptor 2 OS=Homo sapiens GN=EPHA2 PE=1 SV=2 - [EPHA2_HUMAN]					7.96732	3.69	3	3	2.64134	2.87	2	2	7.50095	3.59	3	3	976	108.197	6.22705
Q9H400-2	Isoform 2 of Lck-interacting transmembrane adapter 1 OS=Homo sapiens GN=LIME1 - [LIME1_HUMAN]					9.87952	21.5	2	2	5.97186	21.5	2	2	12.2502	30	3	3	200	20.8277	7.81104
Q5T5U3	Rho GTPase-activating protein 21 OS=Homo sapiens GN=ARHGAP21 PE=1 SV=1 - [RHG21_HUMAN]					17.7434	4.91	5	5	4.53078	2.2	2	2	10.2471	2.86	3	3	1957	217.198	7.79639
Q13488	V-type proton ATPase 116 kDa subunit a isoform 3 OS=Homo sapiens GN=TCIRG1 PE=1 SV=3 - [VPP3_HUMAN]					8.71289	5.18	3	3	5.01388	3.37	2	2	8.59901	3.86	2	3	830	92.9084	7.12256
K7ERZ3	Perilipin-3 (Fragment) OS=Homo sapiens GN=PLIN3 PE=1 SV=1 - [K7ERZ3_HUMAN]					22.7093	15.75	3	6	6.38892	10.62	2	2	12.6286	10.96	2	3	292	31.9632	5.13525
A8K9S3	Coronin OS=Homo sapiens PE=2 SV=1 - [A8K9S3_HUMAN]					7.46315	5.71	3	3	3.99566	3.81	2	2	7.50569	4.95	3	3	525	59.7954	8.08936
Q7L576	Cytoplasmic FMR1-interacting protein 1 OS=Homo sapiens GN=CYFIP1 PE=1 SV=1 - [CYFP1_HUMAN]									3.97414	1.76	2	2	7.67062	2.23	3	3	1253	145.089	6.90283
P49736	DNA replication licensing factor MCM2 OS=Homo sapiens GN=MCM2 PE=1 SV=4 - [MCM2_HUMAN]	5.24183	2.77	2	2	12.9339	7.3	4	4	5.0684	2.77	2	2	7.38584	4.54	2	2	904	101.832	5.51611
B4E1H9	Phosphoglycerate kinase OS=Homo sapiens PE=2 SV=1 - [B4E1H9_HUMAN]	4.76066	10.7	2	2	5.20687	7.03	2	2	4.24065	7.95	2	2	7.37677	10.09	2	2	327	35.0231	8.32373
Q05DA4	P4HA2 protein OS=Homo sapiens GN=P4HA2 PE=2 SV=1 - [Q05DA4_HUMAN]	6.25148	4.76	2	2	13.6345	11.31	4	4	3.97964	5.56	2	2	5.57729	5.56	2	2	504	57.3419	5.63037
Q5U0B3	Proteasome (Prosome, macropain) 26S subunit, non-ATPase, 8 OS=Homo sapiens PE=2 SV=1 - [Q5U0B3_HUMAN]	0	5.84	2	2					3.88197	5.84	2	2	3.89898	5.84	2	2	257	29.9026	7.28369
B3KQF5	cDNA FLJ90381 fis, clone NT2RP2005035, highly similar to Calumenin OS=Homo sapiens PE=2 SV=1 - [B3KQF5_HUMAN]	3.00339	6.35	2	2					3.23739	6.35	2	2	3.78368	4.76	2	2	315	36.9956	4.66553
A0PJ62	RPL14 protein (Fragment) OS=Homo sapiens GN=RPL14 PE=2 SV=1 - [A0PJ62_HUMAN]	2.87776	19.35	2	2					5.22637	19.35	2	2	4.72682	19.35	2	2	124	14.6019	10.6235
Q9HAU0	Pleckstrin homology domain-containing family A member 5 OS=Homo sapiens GN=PLEKHA5 PE=1 SV=1 - [PKHA5_HUMAN]					9.53984	4.3	3	3	4.70439	2.51	2	2	5.49313	3.94	2	2	1116	127.385	7.53271
P28066	Proteasome subunit alpha type-5 OS=Homo sapiens GN=PSMA5 PE=1 SV=3 - [PSA5_HUMAN]					10.1286	17.43	3	3	5.3646	13.28	2	2	8.07053	12.86	2	2	241	26.3942	4.79248
A6NKT7	RanBP2-like and GRIP domain-containing protein 3 OS=Homo sapiens GN=RGPD3 PE=2 SV=2 - [RGPD3_HUMAN]					11.8388	3.3	4	4	4.08763	1.59	2	2	5.98038	1.37	2	2	1758	197.364	6.32861
Q3KNR6	Hsc70-interacting protein OS=Homo sapiens GN=ST13 PE=2 SV=1 - [Q3KNR6_HUMAN]					10.8754	11.37	2	3	5.22984	12.32	2	2	6.198	11.85	2	2	211	23.8959	4.89404
A0A024RCR6	HLA-B associated transcript 3, isoform CRA_a OS=Homo sapiens GN=BAT3 PE=4 SV=1 - [A0A024RCR6_HUMAN]					10.5347	4.8	3	4	0	3.46	2	2	4.94022	3.46	2	2	1126	118.629	5.60498
B4DYA2	cDNA FLJ50292, highly similar to Squamous cell carcinoma antigen recognized byT-cells 3 OS=Homo sapiens PE=2 SV=1 - [B4DYA2_HUMAN]					15.7796	12.14	4	4	6.14492	10.63	2	2	6.4643	7.59	2	2	527	59.4331	8.29443
O60382	KIAA0324 (Fragment) OS=Homo sapiens GN=KIAA0324 PE=4 SV=1 - [O60382_HUMAN]					10.7745	2.74	3	3	5.45723	1.56	2	2	5.89103	1.56	2	2	1791	191.193	11.9272
B4DQY1	cDNA FLJ56133, highly similar to Serine/threonine-protein phosphatase 2A 65 kDa regulatory subunit A alpha isoform OS=Homo sapiens PE=2 SV=1 - [B4DQY1_HUMAN]					5.49109	5.05	2	2	5.44105	5.77	2	2	6.57945	5.41	2	2	555	61.4819	5.12256
P54886-2	Isoform Short of Delta-1-pyrroline-5-carboxylate synthase OS=Homo sapiens GN=ALDH18A1 - [P5CS_HUMAN]									4.93207	2.77	2	2	6.77263	4.04	2	2	793	87.0344	7.12256
P62854	40S ribosomal protein S26 OS=Homo sapiens GN=RPS26 PE=1 SV=3 - [RS26_HUMAN]									2.9738	26.09	2	2	6.87803	20.87	2	2	115	13.0071	11.0044
B4DZP5	cDNA FLJ51165, highly similar to DNA damage-binding protein 1 OS=Homo sapiens PE=2 SV=1 - [B4DZP5_HUMAN]									5.25107	5.81	2	2	8.25261	5.81	2	2	826	91.9275	5.30029
Q9NP79-2	Isoform 2 of Vacuolar protein sorting-associated protein VTA1 homolog OS=Homo sapiens GN=VTA1 - [VTA1_HUMAN]									4.41811	12.61	2	2	5.81615	12.61	2	2	222	24.5381	5.2876
Q10589-2	Isoform 2 of Bone marrow stromal antigen 2 OS=Homo sapiens GN=BST2 - [BST2_HUMAN]									6.1178	14.88	2	2	8.17504	14.88	2	2	168	18.3827	5.59229
O94854-2	Isoform 2 of Uncharacterized protein KIAA0754 OS=Homo sapiens GN=KIAA0754 - [K0754_HUMAN]									5.36031	5.51	2	2	7.29468	5.61	2	2	980	104.592	4.29736
E2QRB3	Pyrroline-5-carboxylate reductase 1, isoform CRA_c OS=Homo sapiens GN=PYCR1 PE=4 SV=2 - [E2QRB3_HUMAN]									4.52872	11.81	2	2	6.52514	12.5	2	2	288	30.1938	7.09326
J3QLE5	Small nuclear ribonucleoprotein-associated protein N (Fragment) OS=Homo sapiens GN=SNRPN PE=4 SV=1 - [J3QLE5_HUMAN]									5.32814	16.57	2	2	6.18275	17.16	2	2	169	17.5353	9.99365
B7Z7X0	cDNA FLJ51151, highly similar to Receptor-interacting serine/threonine-protein kinase 4 (EC 2.7.11.1) OS=Homo sapiens PE=2 SV=1 - [B7Z7X0_HUMAN]									4.74942	3.88	2	2	6.79538	3.61	2	2	721	79.2892	7.06396
B4DP99	Non-specific protein-tyrosine kinase OS=Homo sapiens PE=2 SV=1 - [B4DP99_HUMAN]									4.90959	6.27	2	2	4.62017	4.76	2	2	399	44.7078	7.1958
Q96P63	Serpin B12 OS=Homo sapiens GN=SERPINB12 PE=1 SV=1 - [SPB12_HUMAN]	15.6227	19.51	6	8					3.08138	6.91	2	2					405	46.2471	5.52881
P19474	E3 ubiquitin-protein ligase TRIM21 OS=Homo sapiens GN=TRIM21 PE=1 SV=1 - [RO52_HUMAN]	14.5164	15.37	6	6					4.03385	3.79	2	2					475	54.1351	6.37939
	>sp|CAS2_BOVIN|	5.78417	13.51	3	4					2.12354	8.56	2	2					222	26.0023	8.42627
P62266	40S ribosomal protein S23 OS=Homo sapiens GN=RPS23 PE=1 SV=3 - [RS23_HUMAN]	4.23707	15.38	2	2					4.76575	15.38	2	2					143	15.7977	10.4917
P62861	40S ribosomal protein S30 OS=Homo sapiens GN=FAU PE=1 SV=1 - [RS30_HUMAN]	4.63475	18.64	2	2					4.65063	18.64	2	2					59	6.64382	12.147
P09622-2	Isoform 2 of Dihydrolipoyl dehydrogenase, mitochondrial OS=Homo sapiens GN=DLD - [DLDH_HUMAN]	4.52135	5.85	2	2	6.99983	6.83	2	2	5.76915	7.8	2	2					410	43.5596	7.03467
P19525-2	Isoform 2 of Interferon-induced, double-stranded RNA-activated protein kinase OS=Homo sapiens GN=EIF2AK2 - [E2AK2_HUMAN]	4.80157	4.12	2	2					4.95268	4.71	2	2					510	57.3552	8.03076
Q8IWR8	Ribosomal protein L19 (Fragment) OS=Homo sapiens PE=2 SV=1 - [Q8IWR8_HUMAN]	6.22167	16.18	2	2					5.29025	16.18	2	2					173	20.8068	11.4438
Q9NX63	MICOS complex subunit MIC19 OS=Homo sapiens GN=CHCHD3 PE=1 SV=1 - [MIC19_HUMAN]					6.88451	10.13	2	2	5.60184	11.45	2	2					227	26.1362	8.27979
O60610-2	Isoform 2 of Protein diaphanous homolog 1 OS=Homo sapiens GN=DIAPH1 - [DIAP1_HUMAN]					7.26474	2.16	2	2	5.64819	2.56	2	2					1248	138.819	5.38916
B1AK53	Espin OS=Homo sapiens GN=ESPN PE=1 SV=1 - [ESPN_HUMAN]					9.06338	5.5	3	3	5.93025	4.57	2	2					854	91.6752	6.93213
Q6ZRV2	Protein FAM83H OS=Homo sapiens GN=FAM83H PE=1 SV=3 - [FA83H_HUMAN]					14.8553	5.6	3	3	6.49603	2.71	2	2					1179	127.044	6.97607
O95714	E3 ubiquitin-protein ligase HERC2 OS=Homo sapiens GN=HERC2 PE=1 SV=2 - [HERC2_HUMAN]					7.5698	0.97	2	2	5.58658	0.79	2	2					4834	526.895	6.27783
Q8N3R9-2	Isoform 2 of MAGUK p55 subfamily member 5 OS=Homo sapiens GN=MPP5 - [MPP5_HUMAN]					5.64586	3.9	2	2	4.38449	4.84	2	2					641	73.3758	6.29053
Q12792-4	Isoform 4 of Twinfilin-1 OS=Homo sapiens GN=TWF1 - [TWF1_HUMAN]					10.3842	18.65	4	4	4.76786	12.7	2	2					252	28.805	7.62061
G3XAL9	Solute carrier family 12 (Sodium/potassium/chloride transporters), member 2, isoform CRA_a OS=Homo sapiens GN=SLC12A2 PE=4 SV=1 - [G3XAL9_HUMAN]					9.50694	3.83	3	3	4.72041	3.65	2	2					1150	124.513	6.0874
O60701-3	Isoform 3 of UDP-glucose 6-dehydrogenase OS=Homo sapiens GN=UGDH - [UGDH_HUMAN]					9.58249	11.59	3	3	5.6355	8.31	2	2					397	44.3869	7.6792
B4E0U0	cDNA FLJ61018, highly similar to Ran GTPase-activating protein 1 OS=Homo sapiens PE=2 SV=1 - [B4E0U0_HUMAN]					5.47034	5.9	2	2	4.59615	6.17	2	2					373	40.8124	4.44971
Q9NSK3	Putative uncharacterized protein DKFZp762I166 (Fragment) OS=Homo sapiens GN=DKFZp762I166 PE=2 SV=1 - [Q9NSK3_HUMAN]					4.61886	6.01	2	2	4.43295	13.78	2	2					283	31.4167	5.14795
B4DJD7	Galectin OS=Homo sapiens PE=2 SV=1 - [B4DJD7_HUMAN]					13.1868	18.42	4	4	4.64345	7.89	2	2					266	29.856	8.1333
Q59F49	Minichromosome maintenance deficient protein 5 variant (Fragment) OS=Homo sapiens PE=2 SV=1 - [Q59F49_HUMAN]					5.27498	4.78	2	2	2.26764	4.78	2	2					418	45.7745	7.1958
A0A024QZC0	Ataxin 2-like, isoform CRA_e OS=Homo sapiens GN=ATXN2L PE=4 SV=1 - [A0A024QZC0_HUMAN]					12.1375	6.62	3	4	4.86039	5.44	2	2					846	90.7832	7.97217
O94973-3	Isoform 3 of AP-2 complex subunit alpha-2 OS=Homo sapiens GN=AP2A2 - [AP2A2_HUMAN]									3.11304	3.51	2	2					656	73.0823	7.32764
O43633	Charged multivesicular body protein 2a OS=Homo sapiens GN=CHMP2A PE=1 SV=1 - [CHM2A_HUMAN]									7.02998	8.56	2	2					222	25.0879	5.97314
Q14008-2	Isoform 2 of Cytoskeleton-associated protein 5 OS=Homo sapiens GN=CKAP5 - [CKAP5_HUMAN]									4.80176	1.37	2	2					1972	218.387	8.06006
Q9NUI1-3	Isoform 3 of Peroxisomal 2,4-dienoyl-CoA reductase OS=Homo sapiens GN=DECR2 - [DECR2_HUMAN]									3.84275	7.79	2	2					244	25.5725	9.99365
P09769	Tyrosine-protein kinase Fgr OS=Homo sapiens GN=FGR PE=1 SV=2 - [FGR_HUMAN]									3.76246	5.29	2	2					529	59.4405	5.59229
O75367-2	Isoform 1 of Core histone macro-H2A.1 OS=Homo sapiens GN=H2AFY - [H2AY_HUMAN]									4.58791	8.4	2	2					369	39.1592	9.83252
Q9H1B7	Interferon regulatory factor 2-binding protein-like OS=Homo sapiens GN=IRF2BPL PE=1 SV=1 - [I2BPL_HUMAN]									4.72934	5.15	2	2					796	82.607	8.23584
P05198	Eukaryotic translation initiation factor 2 subunit 1 OS=Homo sapiens GN=EIF2S1 PE=1 SV=3 - [IF2A_HUMAN]									4.51652	6.35	2	2					315	36.0894	5.08447
Q9NX58	Cell growth-regulating nucleolar protein OS=Homo sapiens GN=LYAR PE=1 SV=2 - [LYAR_HUMAN]									2.28127	9.5	2	2					379	43.5879	9.53955
Q9BY77-2	Isoform 2 of Polymerase delta-interacting protein 3 OS=Homo sapiens GN=POLDIP3 - [PDIP3_HUMAN]									4.95003	9.69	2	2					392	42.8678	9.90576
Q9NZQ3-5	Isoform 5 of NCK-interacting protein with SH3 domain OS=Homo sapiens GN=NCKIPSD - [SPN90_HUMAN]									3.91418	4.36	2	2					596	64.1554	6.13818
Q07955-3	Isoform ASF-3 of Serine/arginine-rich splicing factor 1 OS=Homo sapiens GN=SRSF1 - [SRSF1_HUMAN]									3.86611	9.95	2	2					201	22.446	7.94287
P62995-3	Isoform 3 of Transformer-2 protein homolog beta OS=Homo sapiens GN=TRA2B - [TRA2B_HUMAN]									2.98947	13.83	2	2					188	21.9217	10.1548
Q2NL82	Pre-rRNA-processing protein TSR1 homolog OS=Homo sapiens GN=TSR1 PE=1 SV=1 - [TSR1_HUMAN]									5.09154	3.61	2	2					804	91.7519	7.41553
Q9Y6W5	Wiskott-Aldrich syndrome protein family member 2 OS=Homo sapiens GN=WASF2 PE=1 SV=3 - [WASF2_HUMAN]									4.65011	5.42	2	2					498	54.2504	5.52881
Q9H0D6-2	Isoform 2 of 5'-3' exoribonuclease 2 OS=Homo sapiens GN=XRN2 - [XRN2_HUMAN]									5.38374	3.55	2	2					874	99.8981	8.01611
Q08J23-3	Isoform 3 of tRNA (cytosine(34)-C(5))-methyltransferase OS=Homo sapiens GN=NSUN2 - [NSUN2_HUMAN]									5.6391	5.46	2	2					531	59.346	6.55127
B4DN60	cDNA FLJ52703, highly similar to Asparaginyl-tRNA synthetase, cytoplasmic (EC6.1.1.22) OS=Homo sapiens PE=2 SV=1 - [B4DN60_HUMAN]									2.15519	9.7	2	2					299	34.899	5.021
Q9UJU6-5	Isoform 5 of Drebrin-like protein OS=Homo sapiens GN=DBNL - [DBNL_HUMAN]									4.72659	9.17	2	2					327	37.0781	5.03369
P51532-5	Isoform 5 of Transcription activator BRG1 OS=Homo sapiens GN=SMARCA4 - [SMCA4_HUMAN]									3.79085	1.3	2	2					1613	181.147	7.98682
P46779-4	Isoform 4 of 60S ribosomal protein L28 OS=Homo sapiens GN=RPL28 - [RL28_HUMAN]									5.19275	18.84	2	2					69	7.88318	10.6968
P14866-2	Isoform 2 of Heterogeneous nuclear ribonucleoprotein L OS=Homo sapiens GN=HNRNPL - [HNRPL_HUMAN]									5.30087	9.43	2	2					456	50.5285	7.50342
Q13595-4	Isoform 4 of Transformer-2 protein homolog alpha OS=Homo sapiens GN=TRA2A - [TRA2A_HUMAN]									2.06138	13.89	2	2					180	20.577	10.1694
B4DV47	cDNA FLJ57893, highly similar to Parafibromin OS=Homo sapiens PE=2 SV=1 - [B4DV47_HUMAN]									4.73993	7.91	2	2					316	35.9149	9.27588
B4DT23	cDNA FLJ52744, highly similar to Protein FAM98A OS=Homo sapiens PE=2 SV=1 - [B4DT23_HUMAN]									5.24438	10.53	2	2					323	34.0664	10.0083
P30048-2	Isoform 2 of Thioredoxin-dependent peroxide reductase, mitochondrial OS=Homo sapiens GN=PRDX3 - [PRDX3_HUMAN]									2.06484	10.92	2	2					238	25.8223	7.45947
E9PMI6	Methylosome subunit pICln OS=Homo sapiens GN=CLNS1A PE=1 SV=1 - [E9PMI6_HUMAN]									5.9167	26.35	2	2					167	18.2477	4.41162
E7ETE2	Histidine--tRNA ligase, cytoplasmic (Fragment) OS=Homo sapiens GN=HARS PE=1 SV=1 - [E7ETE2_HUMAN]									4.65593	7.99	2	2					288	31.9108	5.68115
G3V3T3	Apoptotic chromatin condensation inducer in the nucleus (Fragment) OS=Homo sapiens GN=ACIN1 PE=1 SV=1 - [G3V3T3_HUMAN]									3.12345	14.43	2	2					194	21.1132	4.55127
D6R9P3	Heterogeneous nuclear ribonucleoprotein A/B OS=Homo sapiens GN=HNRNPAB PE=1 SV=1 - [D6R9P3_HUMAN]									5.6704	9.64	2	2					280	30.284	7.91357
B3KRK2	DEAD (Asp-Glu-Ala-Asp) box polypeptide 41, isoform CRA_a OS=Homo sapiens GN=DDX41 PE=2 SV=1 - [B3KRK2_HUMAN]									5.3825	5.44	2	2					496	55.3737	8.17725
Q9UPN1	Serine/threonine-protein phosphatase (Fragment) OS=Homo sapiens GN=PPP1CC PE=3 SV=1 - [Q9UPN1_HUMAN]									5.50987	8.16	2	2					294	33.7518	5.24951
K7EKI4	39S ribosomal protein L4, mitochondrial OS=Homo sapiens GN=MRPL4 PE=1 SV=1 - [K7EKI4_HUMAN]									5.22661	27.56	2	2					127	14.0473	7.40088
B4DTI4	cDNA FLJ50668, highly similar to AP-2 complex subunit mu-1 OS=Homo sapiens PE=2 SV=1 - [B4DTI4_HUMAN]									1.76315	7.87	2	2					305	34.8353	9.53955
F8VRK6	Ataxin-2 (Fragment) OS=Homo sapiens GN=ATXN2 PE=1 SV=2 - [F8VRK6_HUMAN]									2.0506	13.62	2	2					235	25.8254	8.90967
Q86U11	Full-length cDNA clone CS0DE006YM09 of Placenta of Homo sapiens (human) (Fragment) OS=Homo sapiens PE=2 SV=1 - [Q86U11_HUMAN]									5.13739	8.35	2	2					431	47.6789	9.86182
K7EMV3	Histone H3 OS=Homo sapiens GN=H3F3B PE=1 SV=1 - [K7EMV3_HUMAN]									5.08172	19.57	2	2					92	10.3278	11.8247
M0R2S2	Epidermal growth factor receptor substrate 15-like 1 OS=Homo sapiens GN=EPS15L1 PE=1 SV=1 - [M0R2S2_HUMAN]									6.12663	7.83	2	2					447	49.8263	5.13525
B4DDC8	cDNA FLJ57252, highly similar to Protein phosphatase 2C isoform gamma (EC 3.1.3.16) OS=Homo sapiens PE=2 SV=1 - [B4DDC8_HUMAN]									4.27814	8.16	2	2					515	56.1002	4.33545
H7C0X7	Methionine adenosyltransferase 2 subunit beta (Fragment) OS=Homo sapiens GN=MAT2B PE=1 SV=1 - [H7C0X7_HUMAN]									5.15135	19.19	2	2					198	22.049	5.59229
Q59GC1	Fragile X mental retardation 1 variant (Fragment) OS=Homo sapiens PE=2 SV=1 - [Q59GC1_HUMAN]									4.7262	3.98	2	2					527	59.118	8.646
B4DZ22	cDNA FLJ54042, highly similar to ATP-binding cassette sub-family D member 3 OS=Homo sapiens PE=2 SV=1 - [B4DZ22_HUMAN]									5.97078	5.8	2	2					586	67.3159	8.95361
H0YAF8	Guanine nucleotide-binding protein subunit beta-2-like 1 (Fragment) OS=Homo sapiens GN=GNB2L1 PE=1 SV=1 - [H0YAF8_HUMAN]									4.90285	14.14	2	2					198	22.03	6.32861
B2R8F3	cDNA, FLJ93871, highly similar to Homo sapiens melanoma antigen, family B, 2 (MAGEB2), mRNA OS=Homo sapiens PE=2 SV=1 - [B2R8F3_HUMAN]									6.01171	7.84	2	2					319	35.1821	9.11475
B4E054	cDNA FLJ58444, highly similar to Vacuolar ATP synthase subunit H (EC 3.6.3.14) OS=Homo sapiens PE=2 SV=1 - [B4E054_HUMAN]									4.99237	7.44	2	2					457	52.6776	6.7417
B4DTM6	cDNA FLJ61391, highly similar to Protein transport protein Sec24B OS=Homo sapiens PE=2 SV=1 - [B4DTM6_HUMAN]									7.38945	3.72	2	2					1182	128.839	7.13721
H7C2S8	Procollagen-lysine,2-oxoglutarate 5-dioxygenase 3 (Fragment) OS=Homo sapiens GN=PLOD3 PE=1 SV=1 - [H7C2S8_HUMAN]									4.83718	9.85	2	2					264	30.8278	5.8335
B3KN68	cDNA FLJ13801 fis, clone THYRO1000173, highly similar to AP-1 complex subunit mu-2 OS=Homo sapiens PE=2 SV=1 - [B3KN68_HUMAN]									1.90801	6.86	2	2					423	48.0361	8.22119
A0A0A0MSS4	Nuclear migration protein nudC (Fragment) OS=Homo sapiens GN=NUDC PE=4 SV=1 - [A0A0A0MSS4_HUMAN]									5.33398	22.56	2	2					133	15.2867	5.22412
H0Y4X3	RNA-binding protein 39 (Fragment) OS=Homo sapiens GN=RBM39 PE=1 SV=4 - [H0Y4X3_HUMAN]									4.16939	6.25	2	2					336	36.6015	5.60498
A0A087WYU1	Sorting nexin OS=Homo sapiens GN=SNX9 PE=1 SV=1 - [A0A087WYU1_HUMAN]									4.47121	5.56	2	2					594	66.4346	5.57959
A0A024R652	Methylenetetrahydrofolate dehydrogenase (NADP+ dependent) 1, methenyltetrahydrofolate cyclohydrolase, formyltetrahydrofolate synthetase, isoform CRA_a OS=Homo sapiens GN=MTHFD1 PE=3 SV=1 - [A0A024R652_HUMAN]									3.53332	2.14	2	2					935	101.467	7.18115
P09382	Galectin-1 OS=Homo sapiens GN=LGALS1 PE=1 SV=2 - [LEG1_HUMAN]					46.3027	45.19	5	14					57.385	55.56	8	20	135	14.7062	5.50342
Q53R15	Putative uncharacterized protein MYL1 (Fragment) OS=Homo sapiens GN=MYL1 PE=4 SV=1 - [Q53R15_HUMAN]	9.05098	19.29	2	3	44.3734	11.43	2	12					60.5877	11.43	2	16	140	15.5938	4.79248
A8MQ03	Cysteine-rich tail protein 1 OS=Homo sapiens GN=CYSRT1 PE=1 SV=1 - [CRTP1_HUMAN]													24.4572	20.14	2	16	144	15.3029	7.06396
Q9H4G4	Golgi-associated plant pathogenesis-related protein 1 OS=Homo sapiens GN=GLIPR2 PE=1 SV=3 - [GAPR1_HUMAN]					39.9819	31.17	4	11					44.1621	48.05	5	12	154	17.2075	9.40771
Q13409-3	Isoform 2C of Cytoplasmic dynein 1 intermediate chain 2 OS=Homo sapiens GN=DYNC1I2 - [DC1I2_HUMAN]					12.0353	3.59	2	3					25.4546	15.52	6	8	612	68.3837	5.2876
Q9UBI6	Guanine nucleotide-binding protein G(I)/G(S)/G(O) subunit gamma-12 OS=Homo sapiens GN=GNG12 PE=1 SV=3 - [GBG12_HUMAN]					12.1964	51.39	4	5					22.3279	51.39	5	7	72	8.00117	8.96826
P09496-2	Isoform Non-brain of Clathrin light chain A OS=Homo sapiens GN=CLTA - [CLCA_HUMAN]					11.5017	13.3	2	3					23.7041	17.43	3	6	218	23.6474	4.52588
Q03001-8	Isoform 2 of Dystonin OS=Homo sapiens GN=DST - [DYST_HUMAN]					36.9584	2.98	9	11					22.4847	1.8	5	6	5171	590.67	5.68115
Q6P2E9-2	Isoform 2 of Enhancer of mRNA-decapping protein 4 OS=Homo sapiens GN=EDC4 - [EDC4_HUMAN]					11.1915	4.31	3	3					18.5035	9.31	5	6	1020	109.66	5.98584
Q6IAA8	Ragulator complex protein LAMTOR1 OS=Homo sapiens GN=LAMTOR1 PE=1 SV=2 - [LTOR1_HUMAN]					19.0479	40.37	4	5					21.4958	48.45	5	6	161	17.7338	5.14795
Q7KZ41	Putative uncharacterized protein (Fragment) OS=Homo sapiens PE=4 SV=1 - [Q7KZ41_HUMAN]					7.27826	2.68	3	3					16.2905	6.12	6	6	1192	139.589	9.61279
H0YNH8	Uveal autoantigen with coiled-coil domains and ankyrin repeats OS=Homo sapiens GN=UACA PE=1 SV=1 - [H0YNH8_HUMAN]					24.6658	6.21	8	9					17.0969	5.92	6	6	1401	161.209	6.93213
P62913-2	Isoform 2 of 60S ribosomal protein L11 OS=Homo sapiens GN=RPL11 - [RL11_HUMAN]					10.0601	12.99	2	3					15.3624	12.99	2	5	177	20.1116	9.59814
O43166-3	Isoform 3 of Signal-induced proliferation-associated 1-like protein 1 OS=Homo sapiens GN=SIPA1L1 - [SI1L1_HUMAN]					24.1399	5.11	6	7					16.5795	4.77	5	5	1782	197.285	8.29443
B4DYG5	cDNA FLJ60960, highly similar to Phosphatidylinositol 4-kinase alpha (EC 2.7.1.67) OS=Homo sapiens PE=2 SV=1 - [B4DYG5_HUMAN]					5.12904	1.14	2	2					14.2258	3	5	5	2102	236.604	7.09326
P0CW22	40S ribosomal protein S17-like OS=Homo sapiens GN=RPS17L PE=1 SV=1 - [RS17L_HUMAN]													13.9399	35.56	2	5	135	15.5404	9.84717
C5IWX5	MHC class I antigen OS=Homo sapiens GN=HLA-A PE=3 SV=1 - [C5IWX5_HUMAN]													18.7083	23.84	5	5	365	40.8361	6.99072
B4DWM8	cDNA FLJ56259, highly similar to Vacuolar ATP synthase subunit S1 (EC 3.6.3.14) OS=Homo sapiens PE=2 SV=1 - [B4DWM8_HUMAN]													13.5861	16.33	4	5	294	32.8506	7.48877
H0YCT5	Histone-binding protein RBBP4 (Fragment) OS=Homo sapiens GN=RBBP4 PE=1 SV=1 - [H0YCT5_HUMAN]	6.78203	23.89	3	3									11.0466	27.78	4	4	180	20.2416	4.56396
P51610-2	Isoform 2 of Host cell factor 1 OS=Homo sapiens GN=HCFC1 - [HCFC1_HUMAN]					13.8848	4.37	4	4					13.3972	3.41	3	4	1966	201.724	7.45947
P05556	Integrin beta-1 OS=Homo sapiens GN=ITGB1 PE=1 SV=2 - [ITB1_HUMAN]					17.4386	7.27	5	6					10.9843	6.02	4	4	798	88.357	5.38916
Q14571	Inositol 1,4,5-trisphosphate receptor type 2 OS=Homo sapiens GN=ITPR2 PE=1 SV=2 - [ITPR2_HUMAN]					5.22084	0.89	2	2					8.23581	1.67	4	4	2701	307.867	6.43018
Q15746-4	Isoform 3B of Myosin light chain kinase, smooth muscle OS=Homo sapiens GN=MYLK - [MYLK_HUMAN]					19.0923	4.07	5	6					11.6426	4.01	4	4	1794	197.275	6.53662
P48634	Protein PRRC2A OS=Homo sapiens GN=PRRC2A PE=1 SV=3 - [PRC2A_HUMAN]					24.8317	5.7	6	6					15.0293	4.4	4	4	2157	228.724	9.45166
P49792	E3 SUMO-protein ligase RanBP2 OS=Homo sapiens GN=RANBP2 PE=1 SV=2 - [RBP2_HUMAN]					17.7343	3.5	6	6					12.2644	2.11	4	4	3224	357.974	6.20166
P12270	Nucleoprotein TPR OS=Homo sapiens GN=TPR PE=1 SV=3 - [TPR_HUMAN]					5.79825	1.4	2	2					13.9007	3.72	4	4	2363	267.131	5.021
A0AV58	Striatin, calmodulin binding protein 3 OS=Homo sapiens GN=STRN3 PE=2 SV=1 - [A0AV58_HUMAN]					14.8086	6.73	3	4					10.9233	6.17	3	4	713	77.6695	5.26221
B3KU03	cDNA FLJ39022 fis, clone NT2RP7003724, weakly similar to Serine/arginine repetitive matrix protein 1 OS=Homo sapiens PE=2 SV=1 - [B3KU03_HUMAN]					7.26396	6.07	2	2					12.4473	11.13	3	4	593	64.5798	10.6089
Q96KB4	cDNA FLJ14386 fis, clone HEMBA1002417, moderately similar to TIGHT JUNCTION PROTEIN ZO-1 OS=Homo sapiens PE=2 SV=1 - [Q96KB4_HUMAN]					6.57067	4.93	2	2					11.8895	11.13	4	4	548	60.9688	6.0874
B7Z4S4	cDNA FLJ52567, highly similar to Renin receptor OS=Homo sapiens PE=2 SV=1 - [B7Z4S4_HUMAN]					8.84545	6.6	2	3					11.1398	14.78	4	4	318	35.5636	7.59131
H7C0A3	Protein ARPC4-TTLL3 (Fragment) OS=Homo sapiens GN=ARPC4-TTLL3 PE=4 SV=1 - [H7C0A3_HUMAN]					14.0472	19.76	4	5					11.0442	19.76	4	4	167	19.3863	9.49561
Q5T1M5	FK506-binding protein 15 OS=Homo sapiens GN=FKBP15 PE=1 SV=2 - [FKB15_HUMAN]													14.4043	5.25	3	4	1219	133.547	5.19873
Q9H6T3-2	Isoform 2 of RNA polymerase II-associated protein 3 OS=Homo sapiens GN=RPAP3 - [RPAP3_HUMAN]													12.1051	9.98	4	4	631	71.822	7.63525
H3BT29	Protein PML (Fragment) OS=Homo sapiens GN=PML PE=1 SV=1 - [H3BT29_HUMAN]													4.3977	11.25	3	4	240	26.5324	5.68115
Q6KB66-2	Isoform 2 of Keratin, type II cytoskeletal 80 OS=Homo sapiens GN=KRT80 - [K2C80_HUMAN]	7.05946	7.58	3	3	3.54738	2.84	2	2					6.59992	2.84	2	3	422	47.212	5.30029
Q86VP6-2	Isoform 2 of Cullin-associated NEDD8-dissociated protein 1 OS=Homo sapiens GN=CAND1 - [CAND1_HUMAN]	4.75799	2.17	2	2	12.6912	4.61	4	4					9.11629	2.82	2	3	1062	117.814	5.69385
B3KM36	cDNA FLJ10153 fis, clone HEMBA1003417, highly similar to BAG family molecular chaperone regulator 2 OS=Homo sapiens PE=2 SV=1 - [B3KM36_HUMAN]	4.98964	10.43	2	2									8.10918	18.01	3	3	211	23.6972	6.69775
Q9UEY8-2	Isoform 1 of Gamma-adducin OS=Homo sapiens GN=ADD3 - [ADDG_HUMAN]					7.87677	5.79	2	2					13.162	9.64	3	3	674	75.6235	6.81494
Q9NQ84	G-protein coupled receptor family C group 5 member C OS=Homo sapiens GN=GPRC5C PE=1 SV=2 - [GPC5C_HUMAN]					10.2222	8.84	3	3					10.6247	6.35	2	3	441	48.1617	8.42627
Q9ULT8	E3 ubiquitin-protein ligase HECTD1 OS=Homo sapiens GN=HECTD1 PE=1 SV=3 - [HECD1_HUMAN]					13.6589	2.45	4	4					11.3751	3.37	3	3	2610	289.203	5.35107
Q9Y2H5	Pleckstrin homology domain-containing family A member 6 OS=Homo sapiens GN=PLEKHA6 PE=1 SV=4 - [PKHA6_HUMAN]					11.5499	7.54	3	3					9.10712	4.87	3	3	1048	117.056	9.1001
Q9Y520-3	Isoform 3 of Protein PRRC2C OS=Homo sapiens GN=PRRC2C - [PRC2C_HUMAN]					6.58197	1.19	2	2					6.53062	1.93	2	3	2700	295.554	9.01221
P28072	Proteasome subunit beta type-6 OS=Homo sapiens GN=PSMB6 PE=1 SV=4 - [PSB6_HUMAN]					7.4125	12.97	3	3					7.14885	12.97	3	3	239	25.3414	4.91943
O76081-6	Isoform 5 of Regulator of G-protein signaling 20 OS=Homo sapiens GN=RGS20 - [RGS20_HUMAN]					5.73253	15.35	2	2					8.42986	21.58	3	3	241	27.0419	5.09717
P62277	40S ribosomal protein S13 OS=Homo sapiens GN=RPS13 PE=1 SV=2 - [RS13_HUMAN]					7.6835	20.53	3	3					8.27233	20.53	3	3	151	17.2117	10.5356
Q5T5P2-4	Isoform 4 of Sickle tail protein homolog OS=Homo sapiens GN=KIAA1217 - [SKT_HUMAN]					12.3093	5.31	3	4					10.3195	7.39	3	3	866	95.0631	8.22119
P26640	Valine--tRNA ligase OS=Homo sapiens GN=VARS PE=1 SV=4 - [SYVC_HUMAN]					22.362	7.91	7	7					10.5369	3.96	3	3	1264	140.387	7.59131
B4E2V5	cDNA FLJ52062, highly similar to Erythrocyte band 7 integral membrane protein OS=Homo sapiens PE=2 SV=1 - [B4E2V5_HUMAN]					15.8344	16.46	3	5					11.1157	16.46	3	3	237	25.9478	7.38623
G3XAN4	Translocating chain-associated membrane protein 1 OS=Homo sapiens GN=TRAM1 PE=4 SV=1 - [G3XAN4_HUMAN]					7.33287	6.94	2	3					6.43378	6.94	2	3	288	33.4138	9.89111
P33993-3	Isoform 3 of DNA replication licensing factor MCM7 OS=Homo sapiens GN=MCM7 - [MCM7_HUMAN]					4.54202	4.42	2	2					8.84409	6.63	3	3	543	60.6048	6.25244
B4DXI8	cDNA FLJ51373, highly similar to 26S proteasome non-ATPase regulatory subunit 7 OS=Homo sapiens PE=2 SV=1 - [B4DXI8_HUMAN]					11.9375	14.98	2	3					11.4568	14.98	2	3	247	28.28	7.62061
Q9BZL4-5	Isoform 5 of Protein phosphatase 1 regulatory subunit 12C OS=Homo sapiens GN=PPP1R12C - [PP12C_HUMAN]					14.8628	12.16	4	4					7.91452	9.05	3	3	707	77.122	5.63037
Q8WX93-8	Isoform 8 of Palladin OS=Homo sapiens GN=PALLD - [PALLD_HUMAN]					7.65932	3.73	2	2					10.097	5.28	3	3	777	85.8402	6.88818
O43237-2	Isoform 2 of Cytoplasmic dynein 1 light intermediate chain 2 OS=Homo sapiens GN=DYNC1LI2 - [DC1L2_HUMAN]					5.32253	6.75	2	2					8.53598	9.64	3	3	415	44.9768	6.13818
P49915-2	Isoform 2 of GMP synthase [glutamine-hydrolyzing] OS=Homo sapiens GN=GMPS - [GUAA_HUMAN]					5.35503	4.04	2	2					8.57322	5.89	3	3	594	65.8875	7.47412
C9JJX6	Armadillo repeat protein deleted in velo-cardio-facial syndrome OS=Homo sapiens GN=ARVCF PE=1 SV=1 - [C9JJX6_HUMAN]					11.1317	4.03	2	3					8.8315	6.72	3	3	893	96.7686	7.04932
B3KW21	cDNA FLJ41945 fis, clone PLACE6019676, highly similar to Coatomer subunit gamma OS=Homo sapiens PE=2 SV=1 - [B3KW21_HUMAN]					11.8119	7.38	3	4					9.98517	7.38	3	3	610	67.7614	5.0083
Q59FM5	Guanine nucleotide-binding protein G, alpha subunit variant (Fragment) OS=Homo sapiens PE=2 SV=1 - [Q59FM5_HUMAN]					9.72677	7.28	2	3					7.86559	7.28	2	3	357	41.8644	5.69385
Q5JQ44	Putative uncharacterized protein DKFZp547A0616 (Fragment) OS=Homo sapiens GN=DKFZp547A0616 PE=2 SV=1 - [Q5JQ44_HUMAN]					5.1168	11.05	2	2					8.27621	19.34	3	3	181	20.2811	4.80518
B2R7D3	cDNA, FLJ93390, highly similar to Homo sapiens RALBP1 associated Eps domain containing 1 (REPS1),mRNA OS=Homo sapiens PE=2 SV=1 - [B2R7D3_HUMAN]					13.7838	9.54	3	3					13.0337	9.54	3	3	744	80.7993	5.80811
Q5H9P1	Putative uncharacterized protein DKFZp686F1345 (Fragment) OS=Homo sapiens GN=DKFZp686F1345 PE=2 SV=1 - [Q5H9P1_HUMAN]					12.0317	3.84	4	4					8.02494	2.37	3	3	1772	192.263	4.57666
B4DKP4	Galectin OS=Homo sapiens PE=2 SV=1 - [B4DKP4_HUMAN]					13.2202	18.28	4	5					6.58552	10.07	2	3	268	30.1923	9.77393
B4DPY4	cDNA FLJ54272, highly similar to Complement decay-accelerating factor OS=Homo sapiens PE=2 SV=1 - [B4DPY4_HUMAN]					10.594	24.03	3	4					7.21419	18.6	2	3	129	14.3275	7.02002
B2R4D5	Actin-related protein 2/3 complex subunit 3 OS=Homo sapiens PE=2 SV=1 - [B2R4D5_HUMAN]					5.35265	12.36	2	2					9.33948	12.36	2	3	178	20.5073	8.5874
B7ZMH1	KIAA1211 protein OS=Homo sapiens GN=KIAA1211 PE=2 SV=1 - [B7ZMH1_HUMAN]					7.08084	3.16	2	2					9.26585	6.07	3	3	1202	133.561	5.63037
Q562W2	Actin-like protein (Fragment) OS=Homo sapiens GN=ACT PE=3 SV=1 - [Q562W2_HUMAN]					26.5876	28.16	2	8					8.63157	28.16	2	3	103	11.6259	6.11279
O15085	Rho guanine nucleotide exchange factor 11 OS=Homo sapiens GN=ARHGEF11 PE=1 SV=1 - [ARHGB_HUMAN]													7.8054	2.83	3	3	1522	167.601	5.50342
O60271-5	Isoform 5 of C-Jun-amino-terminal kinase-interacting protein 4 OS=Homo sapiens GN=SPAG9 - [JIP4_HUMAN]													9.03955	4.62	2	3	931	103.149	4.88135
P07737	Profilin-1 OS=Homo sapiens GN=PFN1 PE=1 SV=2 - [PROF1_HUMAN]													9.83161	31.43	3	3	140	15.0446	8.26514
A4D1M6	HCG19809 OS=Homo sapiens GN=LOC392793 PE=3 SV=1 - [A4D1M6_HUMAN]													7.67972	9.78	2	3	225	24.8754	4.81787
A6NHM7	Rho GTPase activating protein 22, isoform CRA_a OS=Homo sapiens GN=ARHGAP22 PE=4 SV=1 - [A6NHM7_HUMAN]													9.01223	6.79	3	3	589	64.2734	6.68311
B3KQ25	Proteasome activator complex subunit 3 OS=Homo sapiens GN=PSME3 PE=2 SV=1 - [B3KQ25_HUMAN]													6.92241	9.33	2	3	193	22.4408	6.80029
Q9HB71-3	Isoform 3 of Calcyclin-binding protein OS=Homo sapiens GN=CACYBP - [CYBP_HUMAN]													10.5981	30.27	3	3	185	21.2149	7.89893
G5E9V3	Pleckstrin homology-like domain family B member 2 OS=Homo sapiens GN=PHLDB2 PE=4 SV=1 - [G5E9V3_HUMAN]													10.5278	7.57	3	3	581	64.1409	8.52881
C9JME6	Exocyst complex component 7 (Fragment) OS=Homo sapiens GN=EXOC7 PE=1 SV=1 - [C9JME6_HUMAN]													7.43865	27.27	2	3	121	13.9183	6.17627
C9JD32	60S ribosomal protein L23 (Fragment) OS=Homo sapiens GN=RPL23 PE=1 SV=1 - [C9JD32_HUMAN]													10.0068	50.55	3	3	91	9.66339	11.4878
F8VVM2	Phosphate carrier protein, mitochondrial OS=Homo sapiens GN=SLC25A3 PE=1 SV=1 - [F8VVM2_HUMAN]													8.71695	6.17	2	3	324	36.1376	9.26123
C9JJ34	Ran-specific GTPase-activating protein (Fragment) OS=Homo sapiens GN=RANBP1 PE=1 SV=1 - [C9JJ34_HUMAN]													10.0612	28.83	2	3	163	18.7502	5.21143
B4DP94	cDNA FLJ59828, highly similar to Regulator of G-protein signaling 19 OS=Homo sapiens PE=2 SV=1 - [B4DP94_HUMAN]													10.1034	13.85	2	3	195	22.2215	6.1001
K7EQW8	Tropomyosin alpha-4 chain (Fragment) OS=Homo sapiens GN=TPM4 PE=4 SV=1 - [K7EQW8_HUMAN]													9.91178	57.63	3	3	59	6.80854	4.84326
Q8IYV2	DEAD (Asp-Glu-Ala-Asp) box polypeptide 20 OS=Homo sapiens GN=DDX20 PE=2 SV=1 - [Q8IYV2_HUMAN]													5.89657	3.64	2	3	824	92.0985	7.03467
Q9NXK5	cDNA FLJ20193 fis, clone COLF0795 OS=Homo sapiens PE=2 SV=1 - [Q9NXK5_HUMAN]													6.77701	14.17	3	3	240	26.8125	6.41748
Q6FG99	RPLP1 protein OS=Homo sapiens GN=RPLP1 PE=2 SV=1 - [Q6FG99_HUMAN]													11.3163	51.75	2	3	114	11.5608	4.37354
Q14400	GLUD1 protein (Fragment) OS=Homo sapiens GN=GLUD1 PE=2 SV=1 - [Q14400_HUMAN]													5.35553	11.24	2	3	258	28.6767	7.97217
D6RAN4	60S ribosomal protein L9 (Fragment) OS=Homo sapiens GN=RPL9 PE=1 SV=4 - [D6RAN4_HUMAN]													9.32358	16.02	2	3	181	20.7623	10.1987
	>sp|CASK_BOVIN|	8.6155	14.74	2	3									6.10249	14.74	2	2	190	21.2559	6.771
P28074	Proteasome subunit beta type-5 OS=Homo sapiens GN=PSMB5 PE=1 SV=3 - [PSB5_HUMAN]	4.29901	9.89	2	2	14.5796	15.97	5	5					5.80243	9.51	2	2	263	28.4622	6.91748
B4DF70	cDNA FLJ60461, highly similar to Peroxiredoxin-2 (EC 1.11.1.15) OS=Homo sapiens PE=2 SV=1 - [B4DF70_HUMAN]	5.56223	15.3	2	2									4.8747	10.38	2	2	183	20.0946	8.77783
Q99996-5	Isoform 5 of A-kinase anchor protein 9 OS=Homo sapiens GN=AKAP9 - [AKAP9_HUMAN]					22.4209	2.88	7	9					4.9069	0.67	2	2	3857	447.476	4.98291
Q9NY47-4	Isoform 4 of Voltage-dependent calcium channel subunit alpha-2/delta-2 OS=Homo sapiens GN=CACNA2D2 - [CA2D2_HUMAN]					6.41778	2.32	2	2					5.70791	2.23	2	2	1076	122.04	5.37646
Q9NZZ3	Charged multivesicular body protein 5 OS=Homo sapiens GN=CHMP5 PE=1 SV=1 - [CHMP5_HUMAN]					24.6874	19.18	3	8					8.69856	10.96	2	2	219	24.5554	4.83057
Q9P266	Junctional protein associated with coronary artery disease OS=Homo sapiens GN=KIAA1462 PE=1 SV=3 - [JCAD_HUMAN]					8.45216	2.21	3	3					7.16431	3.46	2	2	1359	148.26	7.09326
Q00653-4	Isoform 4 of Nuclear factor NF-kappa-B p100 subunit OS=Homo sapiens GN=NFKB2 - [NFKB2_HUMAN]					10.2296	4	3	3					7.1337	3.67	2	2	899	96.6179	6.25244
Q6T4R5-2	Isoform 2 of Nance-Horan syndrome protein OS=Homo sapiens GN=NHS - [NHS_HUMAN]					10.8259	4.05	3	3					4.40915	1.53	2	2	1630	176.593	6.78564
Q969F2	Protein naked cuticle homolog 2 OS=Homo sapiens GN=NKD2 PE=1 SV=1 - [NKD2_HUMAN]					11.3661	10.86	3	3					6.95869	6.87	2	2	451	50.0248	7.95752
O00151	PDZ and LIM domain protein 1 OS=Homo sapiens GN=PDLIM1 PE=1 SV=4 - [PDLI1_HUMAN]					8.35148	13.07	2	2					7.73338	13.07	2	2	329	36.049	7.02002
O75381-2	Isoform 2 of Peroxisomal membrane protein PEX14 OS=Homo sapiens GN=PEX14 - [PEX14_HUMAN]					17.9375	18.56	4	5					6.10649	12.28	2	2	334	36.6795	5.13525
Q96BK5	PIN2/TERF1-interacting telomerase inhibitor 1 OS=Homo sapiens GN=PINX1 PE=1 SV=2 - [PINX1_HUMAN]					7.63577	10.67	2	3					5.87511	8.84	2	2	328	37.012	9.59814
P62263	40S ribosomal protein S14 OS=Homo sapiens GN=RPS14 PE=1 SV=3 - [RS14_HUMAN]					8.72251	9.27	2	3					6.56939	9.27	2	2	151	16.2625	10.0522
Q8N0Z3	Spindle and centriole-associated protein 1 OS=Homo sapiens GN=SPICE1 PE=1 SV=1 - [SPICE_HUMAN]					6.1801	3.27	2	2					6.12719	3.27	2	2	855	96.2055	7.44482
Q9Y3F4	Serine-threonine kinase receptor-associated protein OS=Homo sapiens GN=STRAP PE=1 SV=1 - [STRAP_HUMAN]					5.6787	7.43	2	2					6.76798	8.57	2	2	350	38.414	5.12256
P24752	Acetyl-CoA acetyltransferase, mitochondrial OS=Homo sapiens GN=ACAT1 PE=1 SV=1 - [THIL_HUMAN]					4.9067	4.92	2	2					5.72547	4.68	2	2	427	45.1706	8.85107
B3KWW1	cDNA FLJ44001 fis, clone TESTI4022716, highly similar to Probable ATP-dependent RNA helicase DDX58 (EC 3.6.1.-) OS=Homo sapiens PE=2 SV=1 - [B3KWW1_HUMAN]					6.68777	3.63	2	2					6.00116	3.63	2	2	854	97.995	6.66846
G3V1A4	Cofilin 1 (Non-muscle), isoform CRA_a OS=Homo sapiens GN=CFL1 PE=4 SV=1 - [G3V1A4_HUMAN]					7.53348	16.78	2	2					6.77243	16.78	2	2	149	16.8008	8.35303
P11137-4	Isoform 4 of Microtubule-associated protein 2 OS=Homo sapiens GN=MAP2 - [MTAP2_HUMAN]					7.33268	8.77	2	2					6.1488	8.77	2	2	559	58.9186	9.71533
Q9H7D3	NULP1, isoform CRA_c OS=Homo sapiens GN=NULP1 PE=2 SV=1 - [Q9H7D3_HUMAN]					6.1897	15.74	2	2					4.46996	12.96	2	2	216	23.9793	8.00146
O00232-2	Isoform 2 of 26S proteasome non-ATPase regulatory subunit 12 OS=Homo sapiens GN=PSMD12 - [PSD12_HUMAN]					10.8543	7.57	3	3					8.99314	4.82	2	2	436	50.5463	7.88428
G3V295	Proteasome subunit alpha type OS=Homo sapiens GN=PSMA6 PE=1 SV=1 - [G3V295_HUMAN]					4.7119	11.82	2	2					4.69128	11.33	2	2	203	22.8273	8.32373
C9J4V0	Ras-related protein Rab-7a OS=Homo sapiens GN=RAB7A PE=1 SV=1 - [C9J4V0_HUMAN]					5.41899	18.66	2	2					5.08242	18.66	2	2	134	15.1287	8.79248
Q9Y3Z3-3	Isoform 3 of Deoxynucleoside triphosphate triphosphohydrolase SAMHD1 OS=Homo sapiens GN=SAMHD1 - [SAMH1_HUMAN]					5.45826	4.5	2	2					4.66558	4.5	2	2	556	63.6355	6.771
D3DS95	HCG21173, isoform CRA_a OS=Homo sapiens GN=hCG_21173 PE=4 SV=1 - [D3DS95_HUMAN]					9.23611	26.6	2	3					4.65588	26.6	2	2	94	10.1167	10.0669
B3KPT0	cDNA FLJ32143 fis, clone PLACE5000080, highly similar to Absent in melanoma 1 protein (Fragment) OS=Homo sapiens PE=2 SV=1 - [B3KPT0_HUMAN]					8.2896	4.86	3	3					6.99271	4	2	2	926	98.5615	7.59131
H7C1N2	Protein cordon-bleu (Fragment) OS=Homo sapiens GN=COBL PE=1 SV=1 - [H7C1N2_HUMAN]					6.3361	2.53	2	2					4.7774	2.44	2	2	1106	118.965	7.44482
A5PLL2	FUT8 protein OS=Homo sapiens GN=FUT8 PE=2 SV=1 - [A5PLL2_HUMAN]					5.83441	9.09	2	2					6.01451	9.09	2	2	308	35.7984	8.1626
Q14014	PR310 c-K-ras protein (Fragment) OS=Homo sapiens PE=2 SV=1 - [Q14014_HUMAN]					4.64275	15.33	2	2					4.80017	15.33	2	2	150	16.9434	5.21143
A8K897	cDNA FLJ78686, highly similar to Homo sapiens nucleoporin 93kDa (NUP93), mRNA OS=Homo sapiens PE=2 SV=1 - [A8K897_HUMAN]					5.27127	2.81	2	2					4.63357	3.54	2	2	819	93.3236	5.77002
Q8NG19	Multi-functional protein MFP OS=Homo sapiens PE=2 SV=1 - [Q8NG19_HUMAN]					6.82386	9.96	2	2					5.63871	9.96	2	2	261	26.7282	9.31982
O00373	P40 OS=Homo sapiens PE=4 SV=1 - [O00373_HUMAN]					8.74336	6.23	2	4					7.64865	7.12	2	2	337	39.8305	9.39307
Q03135	Caveolin-1 OS=Homo sapiens GN=CAV1 PE=1 SV=4 - [CAV1_HUMAN]													5.32587	13.48	2	2	178	20.4585	6.02393
Q9UBS4	DnaJ homolog subfamily B member 11 OS=Homo sapiens GN=DNAJB11 PE=1 SV=1 - [DJB11_HUMAN]													7.56044	8.38	2	2	358	40.4886	6.17627
Q7LBC6-2	Isoform 2 of Lysine-specific demethylase 3B OS=Homo sapiens GN=KDM3B - [KDM3B_HUMAN]													7.64911	3.18	2	2	1417	154.571	7.18115
Q86UP2-2	Isoform 2 of Kinectin OS=Homo sapiens GN=KTN1 - [KTN1_HUMAN]													6.55235	3.08	2	2	1300	149.519	5.70654
Q9BRK4	Leucine zipper putative tumor suppressor 2 OS=Homo sapiens GN=LZTS2 PE=1 SV=2 - [LZTS2_HUMAN]													7.49621	6.58	2	2	669	72.7149	6.50732
Q9UKK3	Poly [ADP-ribose] polymerase 4 OS=Homo sapiens GN=PARP4 PE=1 SV=3 - [PARP4_HUMAN]													6.42701	1.51	2	2	1724	192.472	5.65576
P18669	Phosphoglycerate mutase 1 OS=Homo sapiens GN=PGAM1 PE=1 SV=2 - [PGAM1_HUMAN]													6.11153	12.6	2	2	254	28.7858	7.18115
Q96M27-4	Isoform 4 of Protein PRRC1 OS=Homo sapiens GN=PRRC1 - [PRRC1_HUMAN]													6.78348	9.97	2	2	311	31.4059	5.13525
P62249	40S ribosomal protein S16 OS=Homo sapiens GN=RPS16 PE=1 SV=2 - [RS16_HUMAN]													5.80035	15.75	2	2	146	16.435	10.2134
Q96FS4	Signal-induced proliferation-associated protein 1 OS=Homo sapiens GN=SIPA1 PE=1 SV=1 - [SIPA1_HUMAN]													5.57831	3.17	2	2	1042	112.08	6.59521
Q04837	Single-stranded DNA-binding protein, mitochondrial OS=Homo sapiens GN=SSBP1 PE=1 SV=1 - [SSBP_HUMAN]													7.45693	22.3	2	2	148	17.249	9.59814
Q8N3V7-3	Isoform 3 of Synaptopodin OS=Homo sapiens GN=SYNPO - [SYNPO_HUMAN]													5.87895	4.67	2	2	685	73.6214	9.33447
Q9Y5Q9	General transcription factor 3C polypeptide 3 OS=Homo sapiens GN=GTF3C3 PE=1 SV=1 - [TF3C3_HUMAN]													2.56641	4.06	2	2	886	101.208	5.07178
O75643-2	Isoform 2 of U5 small nuclear ribonucleoprotein 200 kDa helicase OS=Homo sapiens GN=SNRNP200 - [U520_HUMAN]													4.09703	3.04	2	2	625	71.427	5.24951
B4DST5	Protein-tyrosine-phosphatase OS=Homo sapiens PE=2 SV=1 - [B4DST5_HUMAN]													8.12499	2.91	2	2	1510	164.464	6.91748
B7Z6E8	cDNA FLJ59425, highly similar to SH3-domain kinase-binding protein 1 OS=Homo sapiens PE=2 SV=1 - [B7Z6E8_HUMAN]													7.15284	7.18	2	2	404	44.208	8.98291
B1ALC0	Actin-related protein 2/3 complex subunit 5 OS=Homo sapiens GN=ARPC5 PE=1 SV=1 - [B1ALC0_HUMAN]													6.21024	28.89	2	2	135	14.7984	5.05908
E9PS95	Mitochondrial glutamate carrier 1 (Fragment) OS=Homo sapiens GN=SLC25A22 PE=1 SV=1 - [E9PS95_HUMAN]													7.20476	21.43	2	2	196	20.8332	9.72998
Q13492-4	Isoform 4 of Phosphatidylinositol-binding clathrin assembly protein OS=Homo sapiens GN=PICALM - [PICAL_HUMAN]													7.62798	9.62	2	2	551	59.8807	8.76318
E5RK39	Ribonucleases P/MRP protein subunit POP1 (Fragment) OS=Homo sapiens GN=POP1 PE=1 SV=1 - [E5RK39_HUMAN]													6.15015	18.58	2	2	183	20.6878	11.0776
Q07020-2	Isoform 2 of 60S ribosomal protein L18 OS=Homo sapiens GN=RPL18 - [RL18_HUMAN]													5.65585	15.72	2	2	159	18.08	11.8394
D6RG15	Twinfilin-2 OS=Homo sapiens GN=TWF2 PE=1 SV=1 - [D6RG15_HUMAN]													7.56784	14.17	2	2	254	28.8648	6.12549
D6RCC8	Amidophosphoribosyltransferase OS=Homo sapiens GN=PPAT PE=1 SV=1 - [D6RCC8_HUMAN]													8.16053	17.19	2	2	192	21.0767	6.85889
E7EMW7	E3 ubiquitin-protein ligase UBR5 OS=Homo sapiens GN=UBR5 PE=1 SV=1 - [E7EMW7_HUMAN]													4.92674	0.72	2	2	2792	308.382	5.84619
F6UYG0	Serine/threonine-protein kinase WNK1 OS=Homo sapiens GN=WNK1 PE=1 SV=1 - [F6UYG0_HUMAN]													6.50633	5.85	2	2	393	42.4078	9.14404
E5RJR5	S-phase kinase-associated protein 1 OS=Homo sapiens GN=SKP1 PE=1 SV=1 - [E5RJR5_HUMAN]													6.6804	20.86	2	2	163	18.7083	4.70361
H3BMH2	Ras-related protein Rab-11A (Fragment) OS=Homo sapiens GN=RAB11A PE=3 SV=1 - [H3BMH2_HUMAN]													5.37366	13.55	2	2	155	17.6571	8.33838
Q16393	LFA-3 (Fragment) OS=Homo sapiens PE=2 SV=1 - [Q16393_HUMAN]													6.23808	10.08	2	2	119	13.723	7.37158
A0A5E8	GAS2-like protein 1 OS=Homo sapiens GN=GAS2L1 PE=2 SV=1 - [A0A5E8_HUMAN]													7.1502	6.17	2	2	681	72.6438	10.0522
U3KQB3	Casein kinase I isoform gamma-1 OS=Homo sapiens GN=CSNK1G1 PE=3 SV=1 - [U3KQB3_HUMAN]													5.04949	5.26	2	2	475	54.4474	8.74854
M0QYL4	A-kinase anchor protein 8 (Fragment) OS=Homo sapiens GN=AKAP8 PE=1 SV=2 - [M0QYL4_HUMAN]													8.24481	21.35	2	2	178	19.5391	5.80811
H3BRG4	Cytochrome b-c1 complex subunit 2, mitochondrial OS=Homo sapiens GN=UQCRC2 PE=1 SV=1 - [H3BRG4_HUMAN]													5.42188	7.28	2	2	412	44.607	8.99756
B3KMN2	cDNA FLJ11695 fis, clone HEMBA1005019, highly similar to Homo sapiens SCC-112 protein (SCC-112), mRNA OS=Homo sapiens PE=2 SV=1 - [B3KMN2_HUMAN]													7.05093	11.71	2	2	333	36.4385	8.74854
B2RD24	cDNA, FLJ96424 OS=Homo sapiens PE=2 SV=1 - [B2RD24_HUMAN]													5.00206	3	2	2	733	79.5889	7.97217
H7C3L5	Tax1-binding protein 1 (Fragment) OS=Homo sapiens GN=TAX1BP1 PE=4 SV=1 - [H7C3L5_HUMAN]													7.74811	15.03	2	2	326	37.266	5.19873
B2RA72	cDNA, FLJ94734, Homo sapiens CHMP1.5 protein (CHMP1.5), mRNA OS=Homo sapiens PE=2 SV=1 - [B2RA72_HUMAN]													5.48476	5.1	2	2	196	21.7631	8.104
B4DTA9	cDNA FLJ59753 OS=Homo sapiens PE=2 SV=1 - [B4DTA9_HUMAN]													7.40241	7.69	2	2	429	48.0577	6.44287
B4DKX2	cDNA FLJ52931, highly similar to Homo sapiens abl-interactor 1 (ABI1), transcript variant 3, mRNA OS=Homo sapiens PE=2 SV=1 - [B4DKX2_HUMAN]													7.08875	11.32	2	2	318	34.1316	6.44287
K7EMQ3	Dynamin-2 (Fragment) OS=Homo sapiens GN=DNM2 PE=1 SV=2 - [K7EMQ3_HUMAN]													5.69115	9	2	2	289	33.6597	9.15869
H7C2W9	60S ribosomal protein L31 (Fragment) OS=Homo sapiens GN=RPL31 PE=1 SV=1 - [H7C2W9_HUMAN]													7.58659	29.63	2	2	108	12.8031	11.0044
A8K849	cDNA FLJ75527, highly similar to Homo sapiens zinc finger RNA binding protein (ZFR), mRNA (Fragment) OS=Homo sapiens PE=2 SV=1 - [A8K849_HUMAN]													6.96347	6.18	2	2	631	66.267	9.33447
M0R2P8	PIH1 domain-containing protein 1 (Fragment) OS=Homo sapiens GN=PIH1D1 PE=1 SV=1 - [M0R2P8_HUMAN]													6.50785	19.3	2	2	114	13.2498	5.26221
B4DHG3	cDNA FLJ55329, highly similar to Procollagen-lysine,2-oxoglutarate5-dioxygenase 2 (EC 1.14.11.4) OS=Homo sapiens PE=2 SV=1 - [B4DHG3_HUMAN]													6.30506	4.27	2	2	703	81.0887	6.65381
I3QJX8	Survival motor neuron 1 protein isoform f (Fragment) OS=Homo sapiens GN=SMN1 PE=2 SV=1 - [I3QJX8_HUMAN]													5.24225	21.54	2	2	130	14.1888	4.60205
B7Z3Y3	cDNA FLJ50557, highly similar to Homo sapiens microtubule-associated protein 7 (MAP7), mRNA OS=Homo sapiens PE=2 SV=1 - [B7Z3Y3_HUMAN]													6.39977	4.15	2	2	603	66.9277	9.45166
H0YDD8	60S acidic ribosomal protein P2 (Fragment) OS=Homo sapiens GN=RPLP2 PE=1 SV=1 - [H0YDD8_HUMAN]													7.3134	53.26	2	2	92	9.09046	4.4624
Q562U0	Actin-like protein (Fragment) OS=Homo sapiens GN=ACT PE=3 SV=1 - [Q562U0_HUMAN]													6.0892	45.63	2	2	103	11.5739	6.11279
A8KAK1	cDNA FLJ77398, highly similar to Homo sapiens UDP-glucose ceramide glucosyltransferase-like 1, transcript variant 2, mRNA OS=Homo sapiens PE=2 SV=1 - [A8KAK1_HUMAN]													6.72743	2.09	2	2	1531	174.897	5.51611
Q59F18	Smoothelin isoform b variant (Fragment) OS=Homo sapiens PE=2 SV=1 - [Q59F18_HUMAN]													4.30682	5.43	2	2	534	55.7753	6.72705
E5RFQ9	Serine/threonine-protein kinase 3 (Fragment) OS=Homo sapiens GN=STK3 PE=1 SV=4 - [E5RFQ9_HUMAN]													5.53164	14.04	2	2	228	26.0232	5.21143
A0A096LNZ9	Ubiquitin-like protein ISG15 (Fragment) OS=Homo sapiens GN=ISG15 PE=1 SV=2 - [A0A096LNZ9_HUMAN]													4.19228	15.38	2	2	143	15.5521	6.29053
A0A087WUT6	Eukaryotic translation initiation factor 5B OS=Homo sapiens GN=EIF5B PE=1 SV=1 - [A0A087WUT6_HUMAN]													8.92412	3.93	2	2	1220	138.597	5.57959
P02452	Collagen alpha-1(I) chain OS=Homo sapiens GN=COL1A1 PE=1 SV=5 - [CO1A1_HUMAN]	108.841	21.79	20	46	112.898	16.8	13	35									1464	138.857	5.79541
D3DTX7	Collagen, type I, alpha 1, isoform CRA_a OS=Homo sapiens GN=COL1A1 PE=4 SV=1 - [D3DTX7_HUMAN]	92.1303	29.72	16	37	98.3743	24.41	11	30									885	84.6883	6.23975
Q8N1N4	Keratin, type II cytoskeletal 78 OS=Homo sapiens GN=KRT78 PE=2 SV=2 - [K2C78_HUMAN]	36.544	28.27	11	15													520	56.8305	6.02393
Q8TDL5	BPI fold-containing family B member 1 OS=Homo sapiens GN=BPIFB1 PE=1 SV=1 - [BPIB1_HUMAN]	31.2981	23.35	9	12													484	52.4085	7.2251
B4DN87	cDNA FLJ52569, highly similar to Collagen-binding protein 2 OS=Homo sapiens PE=2 SV=1 - [B4DN87_HUMAN]	31.3047	24.18	8	12													397	44.1761	8.95361
B7ZAL5	cDNA, FLJ79229, highly similar to Lactotransferrin (EC 3.4.21.-) OS=Homo sapiens PE=2 SV=1 - [B7ZAL5_HUMAN]	33.2888	16.82	11	12													666	73.1232	7.78174
B3KSL2	cDNA FLJ36533 fis, clone TRACH2004428, highly similar to Lactotransferrin (EC 3.4.21.-) (Fragment) OS=Homo sapiens PE=2 SV=1 - [B3KSL2_HUMAN]	33.4357	16.07	11	12													697	76.704	8.01611
B2R7Z6	cDNA, FLJ93674 OS=Homo sapiens PE=2 SV=1 - [B2R7Z6_HUMAN]	29.5337	23.35	9	11													484	52.4775	7.54736
B4DRV1	cDNA FLJ51536, highly similar to Protein-glutamine gamma-glutamyltransferase K (EC 2.3.2.13) OS=Homo sapiens PE=2 SV=1 - [B4DRV1_HUMAN]	16.0819	9.45	6	7													751	82.3046	5.99854
P05089	Arginase-1 OS=Homo sapiens GN=ARG1 PE=1 SV=2 - [ARGI1_HUMAN]	11.2032	16.15	5	6													322	34.7133	7.21045
P07305-2	Isoform 2 of Histone H1.0 OS=Homo sapiens GN=H1F0 - [H10_HUMAN]	15.1459	23.73	5	6													177	19.1553	10.8286
I0B0K8	Truncated profilaggrin OS=Homo sapiens GN=FLG PE=4 SV=1 - [I0B0K8_HUMAN]	15.0409	5.72	5	6													4021	430.162	9.29053
A0A087WTA8	Collagen alpha-2(I) chain OS=Homo sapiens GN=COL1A2 PE=4 SV=1 - [A0A087WTA8_HUMAN]	12.2461	3.08	4	6	9.13588	1.32	2	4									1364	129.072	9.01221
P02458-1	Isoform 1 of Collagen alpha-1(II) chain OS=Homo sapiens GN=COL2A1 - [CO2A1_HUMAN]	10.1612	3.81	3	5	5.1561	2.54	2	2									1418	134.307	8.55811
P01605	Ig kappa chain V-I region Lay OS=Homo sapiens PE=1 SV=1 - [KV113_HUMAN]	12.9613	25	2	5													108	11.8268	7.95752
P01833	Polymeric immunoglobulin receptor OS=Homo sapiens GN=PIGR PE=1 SV=4 - [PIGR_HUMAN]	13.5355	8.12	5	5													764	83.2317	5.74463
A0A0A0MS07	Ig gamma-1 chain C region (Fragment) OS=Homo sapiens GN=IGHG1 PE=4 SV=1 - [A0A0A0MS07_HUMAN]	8.54752	13.22	2	5													295	31.963	8.03076
A0A075B6K9	Ig lambda-2 chain C regions (Fragment) OS=Homo sapiens GN=IGLC2 PE=4 SV=1 - [A0A075B6K9_HUMAN]	10.5499	49.06	4	5													106	11.3395	7.23975
Q9Y623	Myosin-4 OS=Homo sapiens GN=MYH4 PE=1 SV=2 - [MYH4_HUMAN]	11.9202	1.81	3	4													1939	222.932	5.84619
	>sp|CAS1_BOVIN|	6.41017	15.42	3	3													214	24.5134	5.021
H0YAS8	Clusterin (Fragment) OS=Homo sapiens GN=CLU PE=4 SV=1 - [H0YAS8_HUMAN]	8.46261	24.29	2	3													140	16.1662	6.01123
J3KRG2	Gasdermin-A (Fragment) OS=Homo sapiens GN=GSDMA PE=1 SV=4 - [J3KRG2_HUMAN]	9.4016	18.99	2	3													158	17.7801	6.02393
	>sp|CATA_HUMAN|	6.79249	7.22	2	2													526	59.5877	7.38623
P01011	Alpha-1-antichymotrypsin OS=Homo sapiens GN=SERPINA3 PE=1 SV=2 - [AACT_HUMAN]	5.33665	6.62	2	2													423	47.6205	5.51611
P31327-2	Isoform 2 of Carbamoyl-phosphate synthase [ammonia], mitochondrial OS=Homo sapiens GN=CPS1 - [CPSM_HUMAN]	5.8138	5.15	2	2													1049	115.964	5.96045
Q9UGM3-7	Isoform 7 of Deleted in malignant brain tumors 1 protein OS=Homo sapiens GN=DMBT1 - [DMBT1_HUMAN]	5.51979	7.7	2	2													2532	273.269	5.43994
Q8NEX9	Short-chain dehydrogenase/reductase family 9C member 7 OS=Homo sapiens GN=SDR9C7 PE=2 SV=1 - [DR9C7_HUMAN]	0	6.39	2	2													313	35.2403	9.15869
Q14574-2	Isoform 3B of Desmocollin-3 OS=Homo sapiens GN=DSC3 - [DSC3_HUMAN]	4.39094	2.98	2	2													839	93.3952	6.31592
O75223	Gamma-glutamylcyclotransferase OS=Homo sapiens GN=GGCT PE=1 SV=1 - [GGCT_HUMAN]	5.08406	12.77	2	2													188	20.9943	5.13525
O75342	Arachidonate 12-lipoxygenase, 12R-type OS=Homo sapiens GN=ALOX12B PE=1 SV=1 - [LX12B_HUMAN]	5.80041	4.71	2	2													701	80.304	7.63525
P62826	GTP-binding nuclear protein Ran OS=Homo sapiens GN=RAN PE=1 SV=3 - [RAN_HUMAN]	5.02012	9.72	2	2	4.82044	9.72	2	2									216	24.4076	7.48877
Q9UKE5-8	Isoform 8 of TRAF2 and NCK-interacting protein kinase OS=Homo sapiens GN=TNIK - [TNIK_HUMAN]	3.15106	2.76	2	2	6.78794	2.21	2	2									1268	144.162	7.13721
C9JUE0	Protein TFG (Fragment) OS=Homo sapiens GN=TFG PE=1 SV=1 - [C9JUE0_HUMAN]	5.12191	29.94	2	2	13.4808	23.57	3	4									157	17.7202	5.04639
P48444-2	Isoform 2 of Coatomer subunit delta OS=Homo sapiens GN=ARCN1 - [COPD_HUMAN]	4.7903	6.15	2	2													423	47.1748	5.59229
C9JVA8	Serpin B8 (Fragment) OS=Homo sapiens GN=SERPINB8 PE=1 SV=1 - [C9JVA8_HUMAN]	4.09674	14.02	2	2													164	18.3209	4.75439
G3GAU4	Anti-H1N1 influenza HA kappa chain variable region (Fragment) OS=Homo sapiens PE=2 SV=1 - [G3GAU4_HUMAN]	4.6765	25.23	2	2													107	11.5987	7.95752
Q9UL85	Myosin-reactive immunoglobulin kappa chain variable region (Fragment) OS=Homo sapiens PE=1 SV=1 - [Q9UL85_HUMAN]	4.89567	24.77	2	2													109	11.7539	8.51416
B5BU01	Eukaryotic translation initiation factor 2 beta OS=Homo sapiens GN=EIF2S2 PE=2 SV=1 - [B5BU01_HUMAN]	4.7568	7.51	2	2													333	38.3064	5.93506
B7Z577	cDNA FLJ60780, highly similar to Carboxypeptidase A4 (EC 3.4.17.-) OS=Homo sapiens PE=2 SV=1 - [B7Z577_HUMAN]	4.55835	14.16	2	2													226	25.1934	6.39209
A2VCR0	MAPRE1 protein (Fragment) OS=Homo sapiens GN=MAPRE1 PE=2 SV=1 - [A2VCR0_HUMAN]	2.9362	21.97	2	2													173	19.396	9.26123
B4E209	cDNA FLJ53463, highly similar to Bactericidal/permeability-increasingprotein-like 1 OS=Homo sapiens PE=2 SV=1 - [B4E209_HUMAN]	4.92252	6.7	2	2													433	46.3472	8.96826
A5D904	RPS9 protein (Fragment) OS=Homo sapiens GN=RPS9 PE=2 SV=1 - [A5D904_HUMAN]	2.54584	10.62	2	2													113	13.1533	10.4478
A0A087X0P6	Protein IGKV2D-29 OS=Homo sapiens GN=IGKV2D-29 PE=4 SV=1 - [A0A087X0P6_HUMAN]	5.26679	19.61	2	2													102	11.1846	5.93506
A0A087WXM6	60S ribosomal protein L17 (Fragment) OS=Homo sapiens GN=RPL17 PE=1 SV=1 - [A0A087WXM6_HUMAN]	2.26505	14.2	2	2	4.85157	14.2	2	2									169	19.5732	10.0376
O94929	Actin-binding LIM protein 3 OS=Homo sapiens GN=ABLIM3 PE=1 SV=3 - [ABLM3_HUMAN]					6.17253	4.25	2	2									683	77.7516	8.54346
Q8IVF2-3	Isoform 3 of Protein AHNAK2 OS=Homo sapiens GN=AHNAK2 - [AHNK2_HUMAN]					7.19489	2.46	3	3									5695	605.268	5.36377
Q96PE2	Rho guanine nucleotide exchange factor 17 OS=Homo sapiens GN=ARHGEF17 PE=1 SV=1 - [ARHGH_HUMAN]					6.11003	1.26	2	2									2063	221.535	6.29053
Q9BZE9-3	Isoform 3 of Tether containing UBX domain for GLUT4 OS=Homo sapiens GN=ASPSCR1 - [ASPC1_HUMAN]					6.67489	8.18	2	2									501	54.4508	6.93213
Q9UHR4	Brain-specific angiogenesis inhibitor 1-associated protein 2-like protein 1 OS=Homo sapiens GN=BAIAP2L1 PE=1 SV=2 - [BI2L1_HUMAN]					7.69147	7.05	2	2									511	56.8471	8.67529
Q5VTR2	E3 ubiquitin-protein ligase BRE1A OS=Homo sapiens GN=RNF20 PE=1 SV=2 - [BRE1A_HUMAN]					7.41881	4.92	2	2									975	113.592	5.93506
O75175-2	Isoform 2 of CCR4-NOT transcription complex subunit 3 OS=Homo sapiens GN=CNOT3 - [CNOT3_HUMAN]					5.83473	4.43	2	2									609	64.0141	5.89697
Q12860-2	Isoform 2 of Contactin-1 OS=Homo sapiens GN=CNTN1 - [CNTN1_HUMAN]					5.28218	3.48	2	2									1007	111.796	5.77002
Q9H0L4	Cleavage stimulation factor subunit 2 tau variant OS=Homo sapiens GN=CSTF2T PE=1 SV=1 - [CSTFT_HUMAN]					7.24588	6.33	2	2									616	64.3955	7.25439
Q8TDM6-4	Isoform 4 of Disks large homolog 5 OS=Homo sapiens GN=DLG5 - [DLG5_HUMAN]					11.2252	2.93	4	4									1809	201.933	7.7085
Q9HC35	Echinoderm microtubule-associated protein-like 4 OS=Homo sapiens GN=EML4 PE=1 SV=3 - [EMAL4_HUMAN]					8.64492	4.08	3	3									981	108.848	6.40479
Q08378-4	Isoform 3 of Golgin subfamily A member 3 OS=Homo sapiens GN=GOLGA3 - [GOGA3_HUMAN]					6.88218	2.03	2	2									1134	126.052	5.33838
Q8NI35	InaD-like protein OS=Homo sapiens GN=INADL PE=1 SV=3 - [INADL_HUMAN]					9.51814	2.39	3	3									1801	196.247	4.94482
O94964-3	Isoform 3 of Protein SOGA1 OS=Homo sapiens GN=SOGA1 - [SOGA1_HUMAN]					7.07665	5.79	2	2									518	55.7261	9.05615
Q9P206-2	Isoform 2 of Uncharacterized protein KIAA1522 OS=Homo sapiens GN=KIAA1522 - [K1522_HUMAN]					4.87567	2.1	2	2									1094	112.993	10.0229
Q9BY89	Uncharacterized protein KIAA1671 OS=Homo sapiens GN=KIAA1671 PE=1 SV=2 - [K1671_HUMAN]					5.94924	1.55	2	2									1806	196.59	8.47021
Q9Y5S2	Serine/threonine-protein kinase MRCK beta OS=Homo sapiens GN=CDC42BPB PE=1 SV=2 - [MRCKB_HUMAN]					10.4556	3.1	3	3									1711	194.193	6.3667
Q8TAD7	Overexpressed in colon carcinoma 1 protein OS=Homo sapiens GN=OCC1 PE=1 SV=2 - [OCC1_HUMAN]					13.7468	57.14	2	4									63	6.40305	6.56592
Q86YP4-2	Isoform 2 of Transcriptional repressor p66-alpha OS=Homo sapiens GN=GATAD2A - [P66A_HUMAN]					5.50967	7.73	2	2									608	65.185	9.80322
Q9NWQ8	Phosphoprotein associated with glycosphingolipid-enriched microdomains 1 OS=Homo sapiens GN=PAG1 PE=1 SV=2 - [PHAG1_HUMAN]					7.06179	10.88	2	2									432	46.9515	4.65283
Q460N5-5	Isoform 5 of Poly [ADP-ribose] polymerase 14 OS=Homo sapiens GN=PARP14 - [PAR14_HUMAN]					5.07075	2.89	2	2									797	89.7336	8.14795
O94906-2	Isoform 2 of Pre-mRNA-processing factor 6 OS=Homo sapiens GN=PRPF6 - [PRP6_HUMAN]					7.16127	3.22	2	2									901	102.364	8.26514
P01112-2	Isoform 2 of GTPase HRas OS=Homo sapiens GN=HRAS - [RASH_HUMAN]					5.43055	13.53	2	2									170	18.8582	4.99561
P49756	RNA-binding protein 25 OS=Homo sapiens GN=RBM25 PE=1 SV=3 - [RBM25_HUMAN]					8.30278	3.91	3	3									843	100.124	6.31592
Q14690	Protein RRP5 homolog OS=Homo sapiens GN=PDCD11 PE=1 SV=3 - [RRP5_HUMAN]					5.77	1.34	2	2									1871	208.57	8.86572
P60866	40S ribosomal protein S20 OS=Homo sapiens GN=RPS20 PE=1 SV=1 - [RS20_HUMAN]					5.84466	22.69	2	2									119	13.3643	9.93506
Q92599-3	Isoform 3 of Septin-8 OS=Homo sapiens GN=SEPT8 - [SEPT8_HUMAN]					10.1608	7.59	3	4									369	43.4922	6.34131
Q9NYJ8-2	Isoform 2 of TGF-beta-activated kinase 1 and MAP3K7-binding protein 2 OS=Homo sapiens GN=TAB2 - [TAB2_HUMAN]					4.01203	3.36	2	2									536	58.0953	8.44092
O43399-2	Isoform 2 of Tumor protein D54 OS=Homo sapiens GN=TPD52L2 - [TPD54_HUMAN]					7.98103	17.74	2	2									186	19.8891	5.47803
P45974-2	Isoform Short of Ubiquitin carboxyl-terminal hydrolase 5 OS=Homo sapiens GN=USP5 - [UBP5_HUMAN]					4.60188	2.4	2	2									835	93.2484	5.08447
P21283	V-type proton ATPase subunit C 1 OS=Homo sapiens GN=ATP6V1C1 PE=1 SV=4 - [VATC1_HUMAN]					6.55186	6.54	3	3									382	43.914	7.45947
O14980	Exportin-1 OS=Homo sapiens GN=XPO1 PE=1 SV=1 - [XPO1_HUMAN]					7.07677	2.43	2	2									1071	123.306	6.06201
E9PJD9	60S ribosomal protein L27a OS=Homo sapiens GN=RPL27A PE=3 SV=1 - [E9PJD9_HUMAN]					8.49856	14.29	2	3									91	10.1206	10.2134
Q15293-2	Isoform 2 of Reticulocalbin-1 OS=Homo sapiens GN=RCN1 - [RCN1_HUMAN]					4.51501	7.14	2	2									280	33.0059	5.021
B4DU91	cDNA FLJ55368, highly similar to Epsin-1 OS=Homo sapiens PE=2 SV=1 - [B4DU91_HUMAN]					13.8377	8.58	2	3									536	55.7975	4.7417
O75487-2	Isoform 2 of Glypican-4 OS=Homo sapiens GN=GPC4 - [GPC4_HUMAN]					9.76175	6.79	2	3									486	54.8749	6.22705
P35606-2	Isoform 2 of Coatomer subunit beta' OS=Homo sapiens GN=COPB2 - [COPB2_HUMAN]					6.95824	3.42	2	2									877	98.9836	5.16064
Q6P4F7-3	Isoform 3 of Rho GTPase-activating protein 11A OS=Homo sapiens GN=ARHGAP11A - [RHGBA_HUMAN]					12.5075	4.92	3	4									834	92.639	9.08545
B3KT25	cDNA FLJ37504 fis, clone BRAWH2017103, highly similar to ATPase WRNIP1 OS=Homo sapiens PE=2 SV=1 - [B3KT25_HUMAN]					6.81206	4.23	3	3									614	66.6332	6.34131
B4DIX5	cDNA FLJ61284, highly similar to Homo sapiens transient receptor potential cation channel, subfamily M, member 4 (TRPM4), mRNA OS=Homo sapiens PE=2 SV=1 - [B4DIX5_HUMAN]					7.08959	3.95	2	2									860	95.5265	8.41162
F8VP97	CCR4-NOT transcription complex subunit 2 (Fragment) OS=Homo sapiens GN=CNOT2 PE=1 SV=1 - [F8VP97_HUMAN]					6.69021	9.35	2	2									321	34.4743	8.92432
E9PEM5	Lipopolysaccharide-responsive and beige-like anchor protein OS=Homo sapiens GN=LRBA PE=1 SV=1 - [E9PEM5_HUMAN]					8.99686	1.51	3	3									2575	286.793	5.51611
Q9NW13-2	Isoform 2 of RNA-binding protein 28 OS=Homo sapiens GN=RBM28 - [RBM28_HUMAN]					4.73251	3.56	2	2									618	69.8802	8.54346
E7EQD7	Disks large homolog 1 OS=Homo sapiens GN=DLG1 PE=1 SV=1 - [E7EQD7_HUMAN]					9.66467	8.51	2	2									658	71.8127	5.38916
Q3LIB1	Putative uncharacterized protein Nbla00445 (Fragment) OS=Homo sapiens GN=Nbla00445 PE=2 SV=1 - [Q3LIB1_HUMAN]					4.6587	2.76	2	2									905	103.082	6.1001
Q9ULX6-2	Isoform 2 of A-kinase anchor protein 8-like OS=Homo sapiens GN=AKAP8L - [AKP8L_HUMAN]					8.40288	5.98	3	3									585	65.1889	5.09717
D3DVQ1	Leucine zipper-EF-hand containing transmembrane protein 1, isoform CRA_a OS=Homo sapiens GN=LETM1 PE=4 SV=1 - [D3DVQ1_HUMAN]					2.97798	3.22	2	2									559	63.5016	5.23682
B4DEW9	cDNA FLJ52478, highly similar to Eukaryotic translation initiation factor 3 subunit 5 OS=Homo sapiens PE=2 SV=1 - [B4DEW9_HUMAN]					11.1786	12.02	2	3									208	23.1518	5.79541
K7ER90	Eukaryotic translation initiation factor 3 subunit G (Fragment) OS=Homo sapiens GN=EIF3G PE=1 SV=1 - [K7ER90_HUMAN]					7.7007	20.7	2	2									227	25.4258	5.49072
Q59E88	DnaJ (Hsp40) homolog, subfamily A, member 3 variant (Fragment) OS=Homo sapiens PE=2 SV=1 - [Q59E88_HUMAN]					5.99477	5.86	2	2									478	52.2534	9.26123
Q96HT3	POLR1C protein (Fragment) OS=Homo sapiens GN=POLR1C PE=2 SV=1 - [Q96HT3_HUMAN]					4.59051	6.8	2	2									338	38.4377	5.59229
H0YJH0	Protein salvador homolog 1 (Fragment) OS=Homo sapiens GN=SAV1 PE=1 SV=1 - [H0YJH0_HUMAN]					5.28298	8.01	2	2									312	36.6429	7.57666
M0R1I2	Urokinase plasminogen activator surface receptor OS=Homo sapiens GN=PLAUR PE=4 SV=1 - [M0R1I2_HUMAN]					5.44753	6.99	2	2									286	31.6169	7.04932
Q06323-3	Isoform 3 of Proteasome activator complex subunit 1 OS=Homo sapiens GN=PSME1 - [PSME1_HUMAN]					6.98898	10.73	2	2									233	26.8529	5.78271
B3KMI4	cDNA FLJ11102 fis, clone PLACE1005646, highly similar to Homo sapiens DEAD (Asp-Glu-Ala-Asp) box polypeptide 42 (DDX42), transcript variant 2, mRNA OS=Homo sapiens PE=2 SV=1 - [B3KMI4_HUMAN]					7.98949	11.3	2	3									407	43.4683	9.83252
B3KRE0	cDNA FLJ34086 fis, clone FCBBF3005320, highly similar to Double-stranded RNA-binding protein Staufen homolog 1 OS=Homo sapiens PE=2 SV=1 - [B3KRE0_HUMAN]					7.97249	7.95	2	2									365	39.9759	9.49561
B7Z3E7	cDNA FLJ56510, highly similar to Tumor suppressor p53-binding protein 1 OS=Homo sapiens PE=2 SV=1 - [B7Z3E7_HUMAN]					8.77462	2.1	3	3									1760	189.802	4.69092
H3BMA1	Mesothelin (Fragment) OS=Homo sapiens GN=MSLN PE=4 SV=2 - [H3BMA1_HUMAN]					5.78852	6.59	2	2									334	37.6476	5.97314
Q53R94	Putative uncharacterized protein RTN4 (Fragment) OS=Homo sapiens GN=RTN4 PE=4 SV=1 - [Q53R94_HUMAN]					6.78099	25.41	2	2									185	19.2884	4.13232
I3L2C7	Gem-associated protein 4 OS=Homo sapiens GN=GEMIN4 PE=1 SV=1 - [I3L2C7_HUMAN]					8.19521	3.34	3	3									1047	118.745	6.18896
H0Y2P0	CD44 antigen (Fragment) OS=Homo sapiens GN=CD44 PE=1 SV=1 - [H0Y2P0_HUMAN]					6.52079	13.94	2	2									287	30.9329	5.35107
Q8TEN0	FLJ00163 protein (Fragment) OS=Homo sapiens GN=FLJ00163 PE=2 SV=1 - [Q8TEN0_HUMAN]					9.76521	14.4	3	6									521	56.2782	9.08545
B4DP56	cDNA FLJ52237, highly similar to Creatine kinase B-type (EC 2.7.3.2) OS=Homo sapiens PE=2 SV=1 - [B4DP56_HUMAN]					6.6591	10.69	2	2									346	38.6694	5.38916
J3KSZ6	Telomeric repeat-binding factor 2 (Fragment) OS=Homo sapiens GN=TERF2 PE=1 SV=1 - [J3KSZ6_HUMAN]					6.08116	24.31	2	2									144	15.456	9.5835
Q96D60	PHLDB1 protein (Fragment) OS=Homo sapiens GN=PHLDB1 PE=2 SV=2 - [Q96D60_HUMAN]					6.85623	7.38	2	2									691	77.8488	6.97607
B7Z7P4	cDNA FLJ53627, highly similar to Antigen peptide transporter 1 OS=Homo sapiens PE=2 SV=1 - [B7Z7P4_HUMAN]					7.69908	8.04	2	2									547	59.902	5.59229
B7Z7P2	cDNA FLJ61633, highly similar to Homo sapiens ubiquitin associated protein 2 (UBAP2), transcript variant 1, mRNA OS=Homo sapiens PE=2 SV=1 - [B7Z7P2_HUMAN]					5.80038	4.81	2	2									686	73.037	7.1958
H0Y394	Vigilin (Fragment) OS=Homo sapiens GN=HDLBP PE=1 SV=1 - [H0Y394_HUMAN]					5.82263	2.16	2	2									973	108.776	7.79639
A2VCQ4	PRKCSH protein (Fragment) OS=Homo sapiens GN=PRKCSH PE=2 SV=1 - [A2VCQ4_HUMAN]					7.98918	17.68	3	3									181	20.2529	4.71631
B7ZB32	cDNA, FLJ79396, highly similar to Phenylalanyl-tRNA synthetase beta chain (EC 6.1.1.20) OS=Homo sapiens PE=2 SV=1 - [B7ZB32_HUMAN]					5.53713	4.08	2	2									490	54.7796	7.50342
Q86U75	Dihydropyrimidinase-like 2 OS=Homo sapiens PE=2 SV=1 - [Q86U75_HUMAN]					8.49821	5.98	2	2									619	66.9753	5.99854
D7PBN3	ESRP1/RAF1 fusion protein OS=Homo sapiens PE=2 SV=1 - [D7PBN3_HUMAN]					4.92105	2.07	2	2									1061	118.541	8.22119
Q68E00	Putative uncharacterized protein DKFZp686G2045 (Fragment) OS=Homo sapiens GN=DKFZp686G2045 PE=4 SV=2 - [Q68E00_HUMAN]					3.0541	6.98	2	2									315	32.5593	6.771
A0A024QZP7	Cell division cycle 2, G1 to S and G2 to M, isoform CRA_a OS=Homo sapiens GN=CDC2 PE=4 SV=1 - [A0A024QZP7_HUMAN]					5.73611	6.73	2	2									297	34.0599	8.39697
A0A024R9T5	HCG20693, isoform CRA_a OS=Homo sapiens GN=hCG_20693 PE=3 SV=1 - [A0A024R9T5_HUMAN]					5.66973	14.86	2	2									148	16.8351	9.20264
A0A0A0MTR7	E3 ubiquitin-protein ligase RNF213 OS=Homo sapiens GN=RNF213 PE=4 SV=1 - [A0A0A0MTR7_HUMAN]					4.91971	0.35	2	2									5207	591.031	6.48096
A0A087WWU1	Transmembrane protein 237 OS=Homo sapiens GN=TMEM237 PE=4 SV=1 - [A0A087WWU1_HUMAN]					6.7395	9	2	2									400	44.5564	6.96143
A0A087WUA5	EH domain-containing protein 4 OS=Homo sapiens GN=EHD4 PE=1 SV=1 - [A0A087WUA5_HUMAN]					6.3633	5.56	2	2									540	61.0747	8.26514

## Sheet: Combined Proteins w. Peptides
Accession	Description	Score IgG IP-1	Coverage IgG IP-1	# Peptides IgG IP-1	# PSM IgG IP-1	Score IgG IP-2	Coverage IgG IP-2	# Peptides IgG IP-2	# PSM IgG IP-2	Score IP V5-1	Coverage IP V5-1	# Peptides IP V5-1	# PSM IP V5-1	Score IP V5-2	Coverage IP V5-2	# Peptides IP V5-2	# PSM IP V5-2	# AAs	MW [kDa]	calc. pI
P35579	Myosin-9 OS=Homo sapiens GN=MYH9 PE=1 SV=4 - [MYH9_HUMAN]	1630.13	65.05	164	672	4771.82	64.18	158	1416	1969.7	69.34	177	865	4067.32	70.56	185	1298	1960	226.392	5.60498
	Sequence	# PSMs	# Proteins	# Protein Groups	Protein Group Accessions	Modifications	MH+ [Da]	q-Value	PEP	A2	XCorr A2	Probability A2	B2	XCorr B2	Probability B2	C2	XCorr C2	Probability C2	D2	XCorr D2	Probability D2	# Missed Cleavages
	IAQLEEELEEEQGNTELINDR	81	3	1	P35579	Q3(Deamidated)	2473.16	0	8.073e-07	High	5.13834	0	High	6.401	0	High	4.42874	0	High	6.37306	0	0
	KANLQIDQINTDLNLER	15	3	1	P35579		1998.06	0	7.311e-06	High	5.10544	0	High	5.62376	0	High	3.52832	0	High	6.13855	0	1
	MQQNIQELEEQLEEEESAR	23	4	1	P35579		2333.06	0	1.848e-06	High	4.87614	0	High	6.03018	0	High	3.56639	0	High	5.78567	0	0
	FLSNGHVTIPGQQDKDMFQETMEAMR	16	4	1	P35579	N4(Deamidated); M17(Oxidation); M22(Oxidation); M25(Oxidation)	3059.36	0	8.785e-07	High	4.87326	0				High	3.55006	0	High	4.75167	0	1
	SMEAEMIQLQEELAAAER	24	3	1	P35579	M2(Oxidation); M6(Oxidation); Q10(Deamidated)	2081.94	0	7.69e-08	High	4.8678	0	High	5.76014	0	High	4.25849	0	High	5.13714	0	0
	DVDRIIGLDQVAGMSETALPGAFK	11	4	1	P35579	M14(Oxidation)	2519.28	0	1.367e-06	High	4.69217	0	High	5.50352	0	High	3.7673	0	High	4.72341	0	1
	LQRELEDATETADAMNR	5	3	1	P35579		1962.92	0	5.279e-06	High	4.58107	0	High	5.53037	0	High	3.44638	0	High	4.41913	0	1
	IAQLEEELEEEQGNTELINDR	45	3	1	P35579		2472.17	0	9.028e-09	High	4.567	0	High	6.54542	0	High	4.20596	0	High	6.73411	0	0
	AQTKEQADFAIEALAK	15	11	2	P35579;Q7Z406-6	Q6(Deamidated)	1734.89	0	1.515e-06	High	4.55494	0	High	5.62689	0	High	4.17147	0	High	5.8006	0	1
	KKVEAQLQELQVK	14	2	1	P35579		1540.9	0	0.0005733	High	4.5119	0	High	4.62459	0	High	4.3026	0	High	5.72619	0	2
	AQTKEQADFAIEALAK	14	11	2	P35579;Q7Z406-6		1733.91	0	1.054e-08	High	4.48428	0	High	5.47147	0	High	4.51363	0	High	6.07173	0	1
	SMEAEMIQLQEELAAAER	21	3	1	P35579	M2(Oxidation); M6(Oxidation)	2080.95	0	4.553e-09	High	4.42567	0	High	5.74007	0	High	5.23085	0	High	5.81992	0	0
	LKSMEAEMIQLQEELAAAER	6	3	1	P35579	M4(Oxidation); M8(Oxidation)	2322.13	0	3.05e-06	High	4.41438	0	High	4.8509	0	High	3.88116	0	High	5.82137	0	1
	QLLQANPILEAFGNAK	31	15	2	Q7Z406-6;P35579		1726.95	0	0.0001188	High	4.40147	0	High	5.22803	0	High	4.4794	0	High	5.03972	0	0
	IAQLEEELEEEQGNTELINDRLK	25	3	1	P35579	N19(Deamidated)	2714.35	0	7.022e-05	High	4.38113	0	High	6.38301	0	High	5.15596	0	High	6.24132	0	1
	SMEAEMIQLQEELAAAER	27	3	1	P35579	M2(Oxidation)	2064.96	0	1.398e-08	High	4.37741	0	High	5.54339	0	High	3.8678	0	High	6.08376	0	0
	KVEAQLQELQVK	10	2	1	P35579		1412.81	0	9.141e-05	High	4.36696	0	High	4.80037	0	High	3.71524	0	High	4.57654	0	1
	MQQNIQELEEQLEEEESAR	27	4	1	P35579	M1(Oxidation); Q11(Deamidated)	2350.04	0	2.106e-05	High	4.31705	0	High	5.12507	0	High	3.797	0	High	5.1603	0	0
	DFSALESQLQDTQELLQEENRQK	11	2	1	P35579		2749.32	0	1.991e-05	High	4.29708	0	High	5.59239	0	High	4.08508	0	High	5.13868	0	1
	ELESQISELQEDLESER	10	3	1	P35579		2033.95	0	6.858e-05	High	4.29598	0	High	5.11243	0	High	3.72435	0	High	5.05023	0	0
	KLEEEQIILEDQNCK	11	3	1	P35579	N13(Deamidated); C14(Carbamidomethyl)	1889.92	0	0.0001536	High	4.29245	0	High	4.19748	0	High	3.13402	0	High	4.84279	0	1
	KMEDSVGCLETAEEVKR	5	1	1	P35579	C8(Carbamidomethyl)	1980.94	0	3.139e-05	High	4.29014	0	High	5.24471	0	High	4.80864	0	High	3.82843	0	2
	DFSALESQLQDTQELLQEENR	23	2	1	P35579		2493.18	0	5.184e-08	High	4.2573	0	High	5.89159	0	High	3.66997	0	High	5.87557	0	0
	IAQLEEELEEEQGNTELINDR	14	3	1	P35579	Q12(Deamidated); N14(Deamidated)	2474.14	0	2.902e-06	High	4.23645	0				High	3.88478	0	High	5.67991	0	0
	IIGLDQVAGMSETALPGAFK	28	4	1	P35579		2018.06	0	4.503e-06	High	4.2352	0	High	5.74553	0	High	3.55387	0	High	5.47303	0	0
	LTEMETLQSQLMAEK	30	4	1	P35579	M4(Oxidation); M12(Oxidation)	1783.85	0	1.935e-05	High	4.21687	0	High	4.90452	0	High	3.98398	0	High	4.48382	0	0
	QAQQERDELADEIANSSGK	24	3	1	P35579		2088.98	0	3.329e-05	High	4.20486	0	High	4.77213	0	High	3.74772	0	High	3.91245	0	1
	KANLQIDQINTDLNLER	32	3	1	P35579	Q8(Deamidated)	1999.05	0	1.845e-05	High	4.18389	0	High	5.62068	0	High	4.55403	0	High	5.90155	0	1
	SMMQDREDQSILCTGESGAGKTENTK	10	5	1	P35579	M2(Oxidation); M3(Oxidation); C13(Carbamidomethyl)	2905.26	0	8.44e-07	High	4.18301	0	High	6.47373	0	High	3.51946	0	High	4.2167	0	2
	LEEEQIILEDQNCK	4	3	1	P35579	C13(Carbamidomethyl)	1760.84	0	4.852e-05	High	4.18008	0	High	5.01097	0							0
	LQVELDNVTGLLSQSDSK	36	2	1	P35579		1946.01	0	4.312e-06	High	4.15761	0	High	6.17567	0	High	3.9849	0	High	5.24257	0	0
	ANLQIDQINTDLNLER	70	3	1	P35579	N13(Deamidated)	1870.95	0	3.046e-06	High	4.15699	0	High	5.80243	0	High	3.937	0	High	5.2839	0	0
	MEDSVGCLETAEEVKR	7	1	1	P35579	C7(Carbamidomethyl)	1852.84	0	4.88e-07	High	4.15589	0	High	5.02973	0	High	2.98094	0	High	5.08695	0	1
	IAQLEEQLDNETKER	39	3	1	P35579	N10(Deamidated)	1816.89	0	2.117e-05	High	4.14643	0	High	5.79713	0	High	3.98359	0	High	5.1338	0	1
	ANLQIDQINTDLNLER	25	3	1	P35579		1869.97	0	7.148e-07	High	4.12657	0	High	5.21297	0	High	3.92938	0	High	5.38095	0	0
	SMEAEMIQLQEELAAAER	8	3	1	P35579		2048.96	0	1.061e-08	High	4.12142	0	High	4.52507	0	High	3.4177	0	High	5.47492	0	0
	SMMQDREDQSILCTGESGAGKTENTK	6	5	1	P35579	C13(Carbamidomethyl)	2873.27	0	3.81e-09	High	4.07804	0	High	5.08162	0				High	6.98515	0	2
	TEMEDLMSSKDDVGK	18	3	1	P35579		1684.74	0	9.976e-06	High	4.05531	0	High	5.34571	0	High	3.87334	0	High	5.32225	0	1
	LQVELDNVTGLLSQSDSK	36	2	1	P35579	Q14(Deamidated)	1947	0	1.972e-06	High	4.05251	0	High	5.92165	0	High	3.95559	0	High	5.25947	0	0
	LTEMETLQSQLMAEK	81	4	1	P35579	M12(Oxidation)	1767.85	0	0.0009417	High	4.0499	0	High	5.08683	0	High	3.87993	0	High	4.96826	0	0
	QAQQERDELADEIANSSGKGALALEEK	11	3	1	P35579	N15(Deamidated)	2901.41	0	0.0002027	High	4.04568	0	High	4.38416	0	High	2.83412	0	High	5.34498	0	2
	TQLEELEDELQATEDAK	17	16	3	P35580;P35580-2;P35579		1961.92	0	8.695e-07	High	3.9975	0	High	5.55788	0	High	3.63559	0	High	4.61434	0	0
	IMGIPEEEQMGLLR	62	4	1	P35579	M2(Oxidation); M10(Oxidation)	1647.81	0	0.0004544	High	3.9833	0	High	4.65493	0	High	3.21672	0	High	4.02825	0	0
	SMMQDREDQSILCTGESGAGK	7	5	1	P35579	C13(Carbamidomethyl)	2300	0	5.259e-06	High	3.98122	0	High	5.63404	0				High	5.28989	0	1
	TQLEELEDELQATEDAKLR	7	16	3	P35580;P35580-2;P35579		2231.11	0	3.539e-05	High	3.9781	0	High	3.83721	0	High	3.57858	0	High	5.21872	0	1
	IAQLEEQLDNETKER	31	3	1	P35579		1815.9	0	2.24e-05	High	3.97051	0	High	5.06634	0	High	3.56455	0	High	4.96537	0	1
	MQQNIQELEEQLEEEESARQK	5	4	1	P35579	M1(Oxidation)	2605.21	0	1.393e-05	High	3.89517	0	High	6.06665	0	High	2.84869	0	High	4.73225	0	1
	MQQNIQELEEQLEEEESAR	25	4	1	P35579	M1(Oxidation)	2349.05	0	2.366e-08	High	3.89211	0	High	6.47983	0	High	4.70415	0	High	5.94535	0	0
	KMEDSVGCLETAEEVKR	4	1	1	P35579	M2(Oxidation); C8(Carbamidomethyl)	1996.93	0	2.388e-06	High	3.86848	0	High	5.05062	0	High	3.47324	0	High	4.68239	0	2
	LKSMEAEMIQLQEELAAAER	7	3	1	P35579	M4(Oxidation)	2306.14	0	7.52e-05	High	3.86398	0				High	3.33135	0	High	4.49424	0	1
	FLSNGHVTIPGQQDKDMFQETMEAMR	9	4	1	P35579	N4(Deamidated); M17(Oxidation)	3027.37	0	0.0003253	High	3.86319	0				High	4.20238	0	High	6.04066	0	1
	QLLQANPILEAFGNAK	46	15	2	Q7Z406-6;P35579	N14(Deamidated)	1727.93	0	0.0002196	High	3.85936	0	High	5.21382	0	High	3.66822	0	High	4.85067	0	0
	QAQQERDELADEIANSSGKGALALEEK	10	3	1	P35579	Q3(Deamidated); Q4(Deamidated)	2902.41	0	0.0005201	High	3.85846	0				High	3.11977	0	High	4.70486	0	2
	NFINNPLAQADWAAK	28	5	1	P35579	N1(Deamidated)	1673.83	0	0.0001194	High	3.84211	0	High	4.77753	0	High	2.76305	0	High	4.13521	0	0
	MQQNIQELEEQLEEEESARQK	6	4	1	P35579	M1(Oxidation); Q20(Deamidated)	2606.19	0	2.323e-08	High	3.83956	0				High	4.19083	0	High	6.33384	0	1
	LQQELDDLLVDLDHQR	8	1	1	P35579		1949.99	0	1.155e-07	High	3.83674	0	High	4.07231	0	High	4.2368	0	High	5.11567	0	0
	ANLQIDQINTDLNLER	27	3	1	P35579	Q7(Deamidated); N9(Deamidated)	1871.94	0	0.0002147	High	3.83512	0	High	5.14969	0	High	3.24332	0	High	4.70492	0	0
	LKKLEEEQIILEDQNCK	5	3	1	P35579	C16(Carbamidomethyl)	2130.11	0	0.0002722	High	3.8164	0				High	4.00961	0	High	4.12805	0	2
	HSQAVEELAEQLEQTKR	6	2	1	P35579		1996.01	0	6.248e-08	High	3.81357	0	High	2.79901	0	High	3.7324	0	High	6.48825	0	1
	NAEQYKDQADKASTR	9	3	1	P35579		1724.82	0	0.0002757	High	3.79735	0				High	3.56859	0	High	4.78883	0	2
	MQQNIQELEEQLEEEESARQK	8	4	1	P35579	Q11(Deamidated)	2590.19	0	0.007191	High	3.79178	0	High	4.36891	0	High	3.88186	0	High	5.69275	0	1
	DFSALESQLQDTQELLQEENRQK	32	2	1	P35579	Q17(Deamidated)	2750.31	0	0.002988	High	3.75533	0	High	5.54264	0	High	3.73366	0	High	5.43645	0	1
	QAQQERDELADEIANSSGK	39	3	1	P35579	Q3(Deamidated)	2089.96	0	0.0001283	High	3.75393	0	High	5.41063	0	High	3.71193	0	High	4.58175	0	1
	MQQNIQELEEQLEEEESAR	61	4	1	P35579	Q11(Deamidated)	2334.04	0	7.868e-06	High	3.73806	0	High	6.15936	0	High	4.20194	0	High	5.53336	0	0
	ERNTDQASMPDNTAAQK	6	9	1	P35579	M9(Oxidation)	1892.84	0	0.0001045	High	3.69339	0	High	3.48193	0	High	2.97123	0	High	3.09506	0	1
	HSQAVEELAEQLEQTK	7	2	1	P35579		1839.91	0	1.413e-08	High	3.66331	0	High	4.03017	0	High	2.94492	0	High	5.30293	0	0
	RQLEEAEEEAQR	10	3	1	P35579		1487.71	0	0.0005508	High	3.65178	0	High	3.46322	0	High	3.71504	0	High	4.14941	0	1
	ADFCIIHYAGK	5	9	3	P35580;P35580-2;P35579	C4(Carbamidomethyl)	1294.62	0	9.784e-05	High	3.64329	0	High	4.00785	0	High	2.7032	0	High	4.20821	0	0
	VIQYLAYVASSHK	34	6	1	P35579		1478.8	0	0.0001068	High	3.6275	0	High	4.08346	0	High	3.22932	0	High	4.0669	0	0
	IAEFTTNLTEEEEK	15	3	1	P35579		1653.79	0	4.5e-06	High	3.61742	0	High	4.05504	0	High	3.66703	0	High	4.22859	0	0
	TEMEDLMSSKDDVGK	29	3	1	P35579	M3(Oxidation); M7(Oxidation)	1716.73	0	1.889e-05	High	3.60688	0	High	5.19595	0	High	3.53093	0	High	4.42848	0	1
	SMMQDREDQSILCTGESGAGKTENTK	20	5	1	P35579	M2(Oxidation); C13(Carbamidomethyl)	2889.27	0	7.476e-06	High	3.5838	0	High	4.67909	0	High	3.35047	0	High	5.60533	0	2
	ALEEAMEQKAELER	17	3	1	P35579		1646.81	0	5.199e-07	High	3.57743	0	High	3.87961	0	High	3.34413	0	High	4.69315	0	1
	SMMQDREDQSILCTGESGAGKTENTK	4	5	1	P35579	M2(Oxidation); M3(Oxidation); C13(Carbamidomethyl); N24(Deamidated)	2906.26	0	8.58e-05	High	3.57605	0							High	2.44961	0	2
	NTDQASMPDNTAAQK	50	9	1	P35579	M7(Oxidation)	1607.7	0	5.688e-05	High	3.57486	0	High	4.96935	0	High	3.37982	0	High	4.54951	0	0
	AKQTLENERGELANEVK	32	2	1	P35579	N7(Deamidated)	1929.99	0	0.002029	High	3.57368	0	High	4.63408	0	High	3.85697	0	High	4.28439	0	2
	EQLEEEEEAKHNLEK	14	2	1	P35579		1854.87	0	2.359e-05	High	3.56308	0	High	5.41583	0	High	3.86283	0	High	4.91064	0	1
	VEDMAELTCLNEASVLHNLK	2	12	3	P35580;P35580-2;P35579	M4(Oxidation); C9(Carbamidomethyl)	2302.11	0	1.057e-05	High	3.56071	0	High	5.24634	0							0
	MQQNIQELEEQLEEEESARQK	5	4	1	P35579		2589.21	0	5.13e-06	High	3.55721	0	High	6.08329	0	High	2.84857	0	High	5.63135	0	1
	IAEFTTNLTEEEEKSK	33	3	1	P35579		1868.91	0	3.66e-05	High	3.55041	0	High	5.35821	0	High	3.21126	0	High	4.83678	0	1
	LKSMEAEMIQLQEELAAAER	5	3	1	P35579	M4(Oxidation); M8(Oxidation); Q10(Deamidated)	2323.12	0	0.0005751	High	3.54812	0				High	3.8139	0	High	4.39541	0	1
	KMQQNIQELEEQLEEEESAR	6	3	1	P35579	M2(Oxidation)	2477.15	0	5.315e-08	High	3.54506	0	High	5.25187	0	High	3.88478	0	High	6.51931	0	1
	LQRELEDATETADAMNR	4	3	1	P35579	M15(Oxidation)	1978.91	0	0.0007969	High	3.5208	0				High	3.8852	0	High	3.86924	0	1
	LTEMETLQSQLMAEK	36	4	1	P35579		1751.86	0	2.016e-05	High	3.52009	0	High	4.96237	0	High	3.83295	0	High	4.55534	0	0
	IIGLDQVAGMSETALPGAFK	76	4	1	P35579	M10(Oxidation)	2034.06	0	7.02e-07	High	3.51201	0	High	5.94493	0	High	3.48215	0	High	5.6809	0	0
	YLYVDKNFINNPLAQADWAAK	8	5	1	P35579		2454.25	0	3.362e-05	High	3.47662	0	High	4.35751	0	High	3.53546	0	High	5.0525	0	1
	DFSALESQLQDTQELLQEENR	33	2	1	P35579	Q10(Deamidated)	2494.16	0	3.626e-07	High	3.47626	0	High	6.08888	0	High	3.10564	0	High	6.00579	0	0
	KLEEEQIILEDQNCK	7	3	1	P35579	C14(Carbamidomethyl)	1888.94	0	9.531e-07	High	3.44979	0	High	6.74551	0	High	3.6919	0	High	6.32225	0	1
	NAEQYKDQADKASTR	36	3	1	P35579	Q8(Deamidated)	1725.8	0	8.646e-05	High	3.44599	0	High	5.12438	0	High	3.5443	0	High	4.667	0	2
	SMMQDREDQSILCTGESGAGK	30	5	1	P35579	M3(Oxidation); C13(Carbamidomethyl)	2315.99	0	7.79e-06	High	3.44488	0	High	4.92804	0	High	4.40027	0	High	4.95855	0	1
	VEAQLQELQVK	7	2	1	P35579		1284.72	0	0.0001541	High	3.40989	0	High	3.88021	0	High	3.34898	0	High	3.9597	0	0
	ALEQQVEEMKTQLEELEDELQATEDAK	8	3	1	P35579	M9(Oxidation)	3163.49	0	2.545e-07	High	3.39785	0	High	3.98789	0	High	4.6928	0	High	7.07553	0	1
	SMMQDREDQSILCTGESGAGK	11	5	1	P35579	M2(Oxidation); M3(Oxidation); C13(Carbamidomethyl)	2331.98	0	6.819e-05	High	3.39653	0	High	5.26211	0	High	2.97353	0	High	4.99254	0	1
	IMGIPEEEQMGLLR	62	4	1	P35579	M2(Oxidation)	1631.81	0	0.0001745	High	3.37806	0	High	4.41532	0	High	3.67105	0	High	4.17465	0	0
	FLSNGHVTIPGQQDKDMFQETMEAMR	3	4	1	P35579	N4(Deamidated); Q19(Deamidated); M22(Oxidation); M25(Oxidation)	3044.34	0	6.918e-05	High	3.37451	0				High	3.34752	0	High	4.83599	0	1
	ELEDATETADAMNR	82	3	1	P35579	M12(Oxidation)	1581.67	0	1.131e-05	High	3.35497	0	High	4.95924	0	High	3.58711	0	High	4.88056	0	0
	HEMPPHIYAITDTAYR	11	5	1	P35579	M3(Oxidation)	1930.92	0	0.0002875	High	3.33879	0	High	4.42208	0	High	3.04182	0	High	4.18839	0	0
	NMDPLNDNIATLLHQSSDK	4	4	1	P35579	M2(Oxidation)	2142.01	0	1.182e-07	High	3.31749	0	High	3.60174	0	High	2.14076	0	High	4.76254	0	0
	KLEEEQIILEDQNCKLAK	6	3	1	P35579	Q12(Deamidated); C14(Carbamidomethyl)	2202.14	0	0.0001559	High	3.31151	0				High	4.4121	0	High	5.31139	0	2
	ELEDATETADAMNR	23	3	1	P35579		1565.68	0	4.58e-05	High	3.29538	0	High	4.25301	0	High	3.10981	0	High	4.2363	0	0
	KKVEAQLQELQVK	16	2	1	P35579	Q11(Deamidated)	1541.89	0	0.02224	High	3.29488	0	High	4.19141	0	High	3.65123	0	High	4.88513	0	2
	QEEEMMAKEEELVK	12	4	1	P35579		1722.79	0	9.368e-05	High	3.28694	0	High	5.42428	0	High	3.39944	0	High	4.44119	0	1
	FLSNGHVTIPGQQDKDMFQETMEAMR	34	4	1	P35579	N4(Deamidated); M22(Oxidation); M25(Oxidation)	3043.36	0	1.122e-05	High	3.28431	0	High	4.03782	0	High	3.82498	0	High	5.19046	0	1
	EDQSILCTGESGAGKTENTKK	7	21	4	P35580;P35580-2;Q7Z406-6;P35579	C7(Carbamidomethyl)	2253.07	0	0.000234	High	3.28166	0	High	4.85033	0	High	3.03129	0	High	4.52046	0	2
	LVWVPSDKSGFEPASLK	2	5	1	P35579		1859.99	0	0.0003381	High	3.26061	0							High	4.45702	0	1
	IIGLDQVAGMSETALPGAFK	9	4	1	P35579	Q6(Deamidated); M10(Oxidation)	2035.05	0	2.77e-06	High	3.2568	0	High	5.34701	0	High	3.63253	0	High	4.01635	0	0
	TVGQLYKEQLAK	23	4	1	P35579		1377.77	0	3.905e-05	High	3.2492	0	High	3.92716	0	High	3.3443	0	High	3.95175	0	1
	IAQLEEQLDNETK	16	3	1	P35579	Q3(Deamidated)	1531.75	0	1.444e-05	High	3.24808	0	High	3.94704	0	High	3.40658	0	High	3.93899	0	0
	KTLEEEAKTHEAQIQEMR	5	2	1	P35579	M17(Oxidation)	2187.07	0	0.0006281	High	3.24035	0				High	3.84594	0	High	4.827	0	2
	TEMEDLMSSKDDVGKSVHELEK	9	3	1	P35579	M3(Oxidation); M7(Oxidation)	2539.15	0	5.722e-05	High	3.22947	0	High	3.91112	0	High	2.643	0	High	4.61388	0	2
	SMEAEMIQLQEELAAAER	22	3	1	P35579	M2(Oxidation); Q8(Deamidated)	2065.94	0	8.739e-07	High	3.21594	0				High	3.29416	0	High	5.11922	0	0
	LTEMETLQSQLMAEK	25	4	1	P35579	Q10(Deamidated)	1752.84	0	0.0002206	High	3.20699	0	High	5.13349	0	High	3.29553	0	High	4.4042	0	0
	TLEEEAKTHEAQIQEMR	16	2	1	P35579		2042.98	0	0.000371	High	3.17421	0	High	3.41781	0	High	3.27016	0	High	4.53622	0	1
	IAQLEEQLDNETK	17	3	1	P35579		1530.77	0	0.0002075	High	3.15952	0	High	4.49883	0	High	3.31203	0	High	4.17917	0	0
	TEMEDLMSSKDDVGK	68	3	1	P35579	M7(Oxidation)	1700.74	0	1.201e-05	High	3.15426	0	High	4.87464	0	High	3.42012	0	High	4.86827	0	1
	NFINNPLAQADWAAK	18	5	1	P35579		1672.85	0	0.0002086	High	3.15177	0	High	4.78992	0	High	2.92309	0	High	4.14559	0	0
	VKLQEMEGTVK	6	3	1	P35579	Q4(Deamidated)	1262.67	0	0.004149	High	3.13728	0	High	4.06669	0	High	3.20088	0	High	4.12177	0	1
	QEEEMMAKEEELVK	38	4	1	P35579	M6(Oxidation)	1738.79	0	0.0001983	High	3.10966	0	High	4.72925	0	High	2.82252	0	High	4.37579	0	1
	LKNKHEAMITDLEER	6	3	1	P35579	M8(Oxidation)	1842.94	0	0.0002354	High	3.10665	0				High	2.81067	0	High	2.21096	0	2
	NMDPLNDNIATLLHQSSDK	8	4	1	P35579		2126.04	0	0.01016	High	3.10591	0	High	4.66354	0	High	1.82171	0	High	4.4589	0	0
	HEMPPHIYAITDTAYR	15	5	1	P35579		1914.92	0	7.068e-07	High	3.08755	0	High	4.07689	0	High	3.32084	0	High	4.72797	0	0
	AKQTLENERGELANEVK	18	2	1	P35579		1929	0	0.0001136	High	3.08576	0	High	5.0898	0	High	3.64434	0	High	5.00745	0	2
	ASREEILAQAKENEK	14	3	1	P35579	Q9(Deamidated)	1716.88	0	3.662e-05	High	3.0513	0	High	3.21273	0	High	3.65872	0	High	4.76428	0	2
	AGKLDPHLVLDQLR	5	9	3	P35580;P35580-2;P35579		1574.9	0	1.295e-05	High	3.04921	0				High	2.99613	0	High	3.25842	0	1
	KLQKDLEGLSQR	3	1	1	P35579	Q3(Deamidated)	1415.78	0	0.001506	High	3.04914	0				High	2.74945	0	High	3.34695	0	2
	NLPIYSEEIVEMYK	15	4	1	P35579	M12(Oxidation)	1743.85	0	0.0004858	High	3.04678	0	High	3.82451	0	High	3.35346	0	High	3.9748	0	0
	ASREEILAQAK	9	3	1	P35579		1215.67	0	0.01458	High	3.03641	0	High	3.15755	0	High	2.76047	0	High	2.95743	0	1
	LKQVEDEKNSFR	9	2	1	P35579		1492.78	0	0.0001051	High	3.02589	0	High	3.19525	0	High	2.57548	0	High	3.63044	0	2
	DLEAHIDSANKNRDEAIK	5	3	1	P35579		2039.01	0	0.002926	High	3.01286	0				High	2.95697	0	High	4.23082	0	2
	QIATLHAQVADMK	19	2	1	P35579		1425.75	0	0.0001795	High	3.01267	0	High	4.00389	0	High	3.45751	0	High	3.55513	0	0
	ASREEILAQAKENEK	9	3	1	P35579		1715.89	0	3.27e-06	High	3.00735	0	High	4.33059	0	High	3.68929	0	High	4.84263	0	2
	DVDRIIGLDQVAGMSETALPGAFK	6	4	1	P35579	Q10(Deamidated); M14(Oxidation)	2520.27	0	0.0006048	High	2.99986	0	High	4.60827	0	High	3.07318	0	High	5.11867	0	1
	QTLENERGELANEVK	11	2	1	P35579	N12(Deamidated)	1730.85	0	0.004025	High	2.9979	0	High	3.17658	0	High	3.16364	0	High	3.15494	0	1
	QTLENERGELANEVK	14	2	1	P35579		1729.87	0	0.0008007	High	2.9848	0	High	4.34733	0	High	3.26751	0	High	4.71304	0	1
	VSHLLGINVTDFTR	26	4	1	P35579		1571.86	0	0.004628	High	2.97864	0	High	4.35944	0	High	3.35786	0	High	3.52662	0	0
	KVEAQLQELQVK	14	2	1	P35579	Q5(Deamidated)	1413.8	0	3.396e-05	High	2.97315	0	High	3.92891	0	High	3.32651	0	High	4.58662	0	1
	TLEEEAKTHEAQIQEMR	11	2	1	P35579	M16(Oxidation)	2058.98	0	3.447e-05	High	2.96235	0	High	2.15699	0	High	2.34234	0	High	3.48021	0	1
	QIATLHAQVADMK	25	2	1	P35579	M12(Oxidation)	1441.75	0	0.0002672	High	2.95717	0	High	3.31613	0	High	3.10352	0	High	3.08345	0	0
	ELEDATETADAMNREVSSLK	15	3	1	P35579		2209.03	0	1.114e-06	High	2.94695	0	High	5.35692	0	High	2.65087	0	High	4.91712	0	1
	VKLQEMEGTVK	3	3	1	P35579	Q4(Deamidated); M6(Oxidation)	1278.66	0	0.01012	High	2.94452	0	High	2.85805	0	High	2.85879	0				1
	KFDQLLAEEK	11	21	4	P35580;P35580-2;Q7Z406-6;P35579		1220.65	0	0.003255	High	2.93671	0	High	3.79673	0	High	2.97414	0	High	3.25074	0	1
	SGFEPASLKEEVGEEAIVELVENGK	3	5	1	P35579		2660.33	0	1.266e-07	High	2.91841	0				High	4.17223	0	High	5.59373	0	1
	NKHEAMITDLEER	15	3	1	P35579	M6(Oxidation)	1601.76	0	2.395e-05	High	2.89154	0	High	4.25985	0	High	2.87658	0	High	4.04155	0	1
	QLAAENRLTEMETLQSQLMAEK	4	4	1	P35579	M19(Oxidation)	2550.26	0	0.001262	High	2.88533	0				High	3.23183	0	High	4.7375	0	1
	NKHEAMITDLEER	3	3	1	P35579		1585.76	0	1.933e-05	High	2.87974	0				High	2.3911	0	High	4.70855	0	1
	QFRTEMEDLMSSKDDVGK	5	3	1	P35579	M6(Oxidation); M10(Oxidation)	2147.96	0	6.635e-05	High	2.85508	0				High	3.2928	0	High	4.37262	0	2
	LDPHLVLDQLR	12	9	3	P35580;P35580-2;P35579		1318.75	0	0.0005438	High	2.85384	0	High	2.47633	0	High	1.99354	0	High	3.09491	0	0
	LTEMETLQSQLMAEK	19	4	1	P35579	Q10(Deamidated); M12(Oxidation)	1768.84	0	9.834e-05	High	2.83695	0	High	4.70212	0	High	3.49505	0	High	4.52201	0	0
	SKREQEVNILK	3	2	1	P35579	Q5(Deamidated)	1344.75	0	0.001441	High	2.82845	0				High	2.83082	0	High	3.1441	0	2
	FLSNGHVTIPGQQDKDMFQETMEAMR	9	4	1	P35579	M22(Oxidation); M25(Oxidation)	3042.38	0	3.182e-05	High	2.82655	0	High	4.24663	0	High	2.22404	0	High	6.30628	0	1
	ALEEAMEQKAELER	7	3	1	P35579	M6(Oxidation); Q8(Deamidated)	1663.79	0	0.008395	High	2.81051	0	High	3.2016	0	High	2.73963	0	High	2.97671	0	1
	LQKDLEGLSQR	6	1	1	P35579		1286.71	0	0.01107	High	2.80913	0	High	3.62142	0	High	2.60522	0	High	2.98737	0	1
	VKLQEMEGTVK	14	3	1	P35579		1261.68	0	0.01629	High	2.80759	0	High	3.73538	0	High	2.60553	0	High	3.27422	0	1
	ALEQQVEEMKTQLEELEDELQATEDAK	6	3	1	P35579	Q4(Deamidated); M9(Oxidation)	3164.46	0	2.886e-05	High	2.79874	0				High	3.97928	0	High	5.39406	0	1
	TDLLLEPYNKYR	8	4	1	P35579		1524.81	0	9.574e-05	High	2.79823	0	High	3.02182	0	High	2.57207	0	High	3.30651	0	1
	DLEAHIDSANKNR	3	3	1	P35579		1482.73	0	0.0002098	High	2.79432	0				High	2.26629	0	High	2.85119	0	1
	ALELDSNLYR	12	4	1	P35579		1193.62	0	0.004025	High	2.78034	0	High	3.19988	0	High	2.42521	0	High	3.2005	0	0
	DDVGKSVHELEK	7	3	1	P35579		1355.68	0	0.0006124	High	2.77685	0	High	3.6104	0	High	2.64914	0	High	4.06563	0	1
	VSHLLGINVTDFTR	1	4	1	P35579	N8(Deamidated)	1572.84	0	0.001048	High	2.77561	0										0
	ALEEAMEQKAELER	26	3	1	P35579	M6(Oxidation)	1662.8	0	9.254e-06	High	2.76368	0	High	4.71322	0	High	3.26449	0	High	3.38381	0	1
	ERNTDQASMPDNTAAQK	12	9	1	P35579		1876.85	0	3.677e-05	High	2.76006	0	High	4.82273	0	High	2.59631	0	High	3.96277	0	1
	ALEEAMEQKAELER	5	3	1	P35579	Q8(Deamidated)	1647.79	0	1.453e-05	High	2.75304	0	High	3.39255	0	High	2.88892	0	High	4.18378	0	1
	THEAQIQEMR	13	2	1	P35579		1242.59	0	0.005578	High	2.74426	0	High	2.89418	0	High	2.74904	0	High	2.88738	0	0
	DLEGLSQRHEEK	6	1	1	P35579		1440.71	0	0.02264	High	2.73505	0	High	2.25079	0	High	2.26335	0	High	2.60199	0	1
	ELEDATETADAMNREVSSLK	4	3	1	P35579	M12(Oxidation); N13(Deamidated)	2226.01	0	0.0005361	High	2.73184	0	High	3.44561	0	High	1.47045	0	High	4.05559	0	1
	CNGVLEGIR	4	30	5	P35580;P35580-2;Q7Z406-6;P35579;Q9Y623	C1(Carbamidomethyl)	1017.52	0	0.01253	High	2.72508	0	High	2.669	0	High	2.55738	0	High	2.67284	0	0
	TEMEDLMSSKDDVGKSVHELEK	9	3	1	P35579		2507.16	0	2.599e-06	High	2.71923	0	High	3.16009	0	High	2.76826	0	High	4.9866	0	2
	LKDVLLQVDDERR	9	3	1	P35579		1598.89	0	0.0008378	High	2.71029	0	High	3.46285	0	High	2.84442	0	High	3.41156	0	2
	FLSNGHVTIPGQQDKDMFQETMEAMR	9	4	1	P35579	M17(Oxidation); M22(Oxidation); M25(Oxidation)	3058.37	0	0.006203	High	2.70183	0	High	3.7941	0	High	2.87435	0	High	4.34366	0	1
	YEILTPNSIPK	8	4	1	P35579	N7(Deamidated)	1275.68	0	0.004492	High	2.69753	0	High	3.54334	0	High	2.8697	0	High	3.15498	0	0
	QLEEAEEEAQR	7	3	1	P35579		1331.61	0	0.0001962	High	2.69425	0	High	3.0658	0	High	2.99278	0	High	3.29986	0	0
	NTDQASMPDNTAAQK	19	9	1	P35579	Q4(Deamidated)	1592.69	0	2.418e-05	High	2.68768	0	High	5.15599	0	High	3.39908	0	High	5.01281	0	0
	EEILAQAKENEK	8	3	1	P35579		1401.72	0	0.00274	High	2.67874	0	High	3.07699	0	High	2.81775	0	High	3.52426	0	1
	LKQVEDEKNSFR	4	2	1	P35579	Q3(Deamidated)	1493.76	0	0.001333	High	2.67582	0				High	2.69533	0	High	3.3753	0	2
	VIQYLAYVASSHK	8	6	1	P35579	Q3(Deamidated)	1479.78	0	0.0002703	High	2.67528	0	High	3.64091	0	High	3.11202	0	High	3.48953	0	0
	DLEAHIDSANK	5	3	1	P35579		1212.59	0	0.001391	High	2.67308	0	High	3.21522	0	High	2.67315	0	High	3.20522	0	0
	QIATLHAQVADMKK	10	2	1	P35579	M12(Oxidation)	1569.84	0	0.0001808	High	2.65442	0				High	3.08903	0	High	2.99728	0	1
	FDQLLAEEK	8	21	4	P35580;P35580-2;Q7Z406-6;P35579		1092.56	0	0.002772	High	2.64834	0	High	3.03742	0	High	2.42027	0	High	2.87921	0	0
	IAQLEEELEEEQGNTELINDRLK	10	3	1	P35579		2713.35	0	1.346e-07	High	2.64059	0	High	5.64922	0	High	3.25011	0	High	6.02993	0	1
	DELADEIANSSGK	8	3	1	P35579		1348.62	0	9.586e-05	High	2.63053	0	High	3.59566	0	High	2.81933	0	High	3.638	0	0
	EMEAELEDERK	43	3	1	P35579	M2(Oxidation)	1394.61	0	0.0007636	High	2.63039	0	High	3.41599	0	High	2.52324	0	High	3.95342	0	1
	KTLEEEAKTHEAQIQEMR	4	2	1	P35579		2171.07	0	0.0004869	High	2.62777	0				High	3.34643	0	High	5.11524	0	2
	LEEEQIILEDQNCK	2	3	1	P35579	N12(Deamidated); C13(Carbamidomethyl)	1761.82	0	0.0007872	High	2.62682	0										0
	TQLEELEDELQATEDAK	5	16	3	P35580;P35580-2;P35579	Q11(Deamidated)	1962.9	0	0.00051	High	2.62678	0	High	4.03398	0				High	4.29502	0	0
	QVREMEAELEDER	6	3	1	P35579	M5(Oxidation)	1649.74	0	0.002342	High	2.61394	0	High	3.09786	0	High	2.55266	0				1
	EMEAELEDER	5	3	1	P35579		1250.52	0	0.001039	High	2.60763	0	High	2.77432	0	High	2.69421	0	High	2.93447	0	0
	EMEAELEDERK	9	3	1	P35579		1378.62	0	0.003655	High	2.60105	0	High	3.52516	0	High	2.89348	0	High	3.15338	0	1
	VKLQEMEGTVK	26	3	1	P35579	M6(Oxidation)	1277.68	0	0.009812	High	2.59007	0	High	4.21562	0	High	2.60715	0	High	4.09839	0	1
	HEAMITDLEER	5	3	1	P35579	M4(Oxidation)	1359.62	0	0.002449	High	2.57675	0	High	3.31145	0	High	2.25841	0	High	2.65661	0	0
	VDYKADEWLMK	15	9	3	P35580;P35580-2;P35579	M10(Oxidation)	1413.67	0	0.0001581	High	2.57499	0	High	2.97044	0	High	2.3969	0	High	3.43743	0	1
	VEAQLQELQVK	9	2	1	P35579	Q6(Deamidated)	1285.7	0	0.0002725	High	2.57411	0	High	3.68617	0	High	2.96512	0	High	4.03392	0	0
	NAEQYKDQADKASTR	1	3	1	P35579	Q4(Deamidated); Q8(Deamidated)	1726.79	0	0.001097	High	2.57208	0										2
	QLLQANPILEAFGNAK	14	15	2	Q7Z406-6;P35579	Q4(Deamidated); N14(Deamidated)	1728.92	0	2.671e-06	High	2.55669	0				High	2.85777	0	High	4.31874	0	0
	FDQLLAEEK	4	21	4	P35580;P35580-2;Q7Z406-6;P35579	Q3(Deamidated)	1093.54	0	0.006426	High	2.55307	0	High	2.47359	0	High	2.32946	0	High	2.93505	0	0
	IMGIPEEEQMGLLR	20	4	1	P35579		1615.82	0	0.0002814	High	2.53416	0	High	3.9399	0	High	3.18289	0	High	3.58222	0	0
	AGVLAHLEEER	8	9	3	P35580;P35580-2;P35579		1223.64	0	9.587e-05	High	2.53264	0	High	2.92101	0	High	2.4585	0	High	3.48623	0	0
	MEDSVGCLETAEEVK	3	1	1	P35579	C7(Carbamidomethyl)	1696.74	0	3.783e-05	High	2.52499	0	High	4.27229	0				High	3.79647	0	0
	TDLLLEPYNKYR	5	4	1	P35579	N9(Deamidated)	1525.79	0	0.0002967	High	2.51847	0				High	2.73997	0	High	3.27527	0	1
	VDYKADEWLMK	12	9	3	P35580;P35580-2;P35579		1397.68	0	4.257e-05	High	2.51422	0	High	3.07793	0	High	2.17874	0	High	3.57755	0	1
	VNKDDIQKMNPPK	2	5	1	P35579	M9(Oxidation)	1542.79	0	0.0007569	High	2.51391	0				High	2.99222	0				2
	DVLLQVDDERR	8	3	1	P35579		1357.71	0	0.01601	High	2.50028	0	High	3.22653	0				High	2.51688	0	1
	ELEDATETADAMNREVSSLK	9	3	1	P35579	N13(Deamidated)	2210.01	0	7.361e-05	High	2.4942	0	High	4.90905	0	High	2.92577	0	High	4.38017	0	1
	QIATLHAQVADMKK	5	2	1	P35579		1553.85	0	9.212e-05	High	2.46246	0	High	3.62635	0	High	2.63877	0	High	4.05131	0	1
	QLAAENRLTEMETLQSQLMAEK	2	4	1	P35579		2534.26	0	0.0005473	High	2.44216	0							High	5.19693	0	1
	NLPIYSEEIVEMYK	13	4	1	P35579		1727.86	0	0.0007898	High	2.42033	0	High	3.99543	0	High	2.47141	0	High	3.97807	0	0
	ALELDSNLYR	4	4	1	P35579	N7(Deamidated)	1194.6	0	0.007766	High	2.40996	0	High	2.96481	0	High	2.28237	0	High	2.6109	0	0
	EDQSILCTGESGAGK	4	22	4	P35580;P35580-2;Q7Z406-6;P35579	C7(Carbamidomethyl)	1551.69	0	1.272e-05	High	2.39735	0	High	3.96387	0	High	2.17606	0	High	4.35023	0	0
	KEEELQAALAR	6	14	2	Q7Z406-6;P35579		1257.68	0	0.004674	High	2.38159	0	High	3.28715	0	High	2.63672	0	High	3.70479	0	1
	LKDVLLQVDDER	4	3	1	P35579		1442.79	0	8.998e-05	High	2.3692	0	High	3.31268	0				High	4.0146	0	1
	TDLLLEPYNK	9	4	1	P35579		1205.64	0	0.002814	High	2.34821	0	High	3.18234	0	High	2.68869	0	High	3.36594	0	0
	EQADFAIEALAK	12	11	2	P35579;Q7Z406-6		1305.67	0	0.001069	High	2.34344	0	High	2.99933	0	High	2.25966	0	High	3.12206	0	0
	KGAGDGSDEEVDGKADGAEAKPAE	24	3	1	P35579		2303.03	0	2.194e-05	High	2.33598	0	High	5.97113	0	High	3.97354	0	High	4.41211	0	2
	TVGQLYKEQLAK	11	4	1	P35579	Q4(Deamidated)	1378.76	0	0.0004234	High	2.33514	0	High	3.35815	0	High	2.40179	0	High	3.60631	0	1
	FVSELWKDVDR	4	4	1	P35579		1393.71	0	0.0003632	High	2.32952	0				High	2.84828	0	High	2.55042	0	1
	VISGVLQLGNIVFKK	17	4	1	P35579		1615	0	0.0003642	High	2.31681	0	High	4.41317	0	High	2.74401	0	High	4.36198	0	1
	RQAQQERDELADEIANSSGK	5	3	1	P35579		2245.08	0	0.0001997	High	2.31306	0				High	2.08547	0	High	3.2885	0	2
	NLPIYSEEIVEMYKGK	3	4	1	P35579	M12(Oxidation)	1928.97	0	0.001221	High	2.30899	0				High	2.5246	0	High	3.72191	0	1
	SMMQDREDQSILCTGESGAGK	9	5	1	P35579	M2(Oxidation); M3(Oxidation); Q9(Deamidated); C13(Carbamidomethyl)	2332.97	0	0.001414	High	2.29971	0	High	3.89498	0	High	3.15581	0	High	4.21558	0	1
	KLVWVPSDK	4	5	1	P35579		1071.62	0	0.02001	High	2.27785	0	High	2.99953	0	High	2.50848	0	High	3.07445	0	1
	ELEDATETADAMNREVSSLK	14	3	1	P35579	M12(Oxidation)	2225.02	0	0.0003935	High	2.2768	0	High	3.82315	0	High	1.62941	0	High	4.34038	0	1
	IAEFTTNLTEEEEK	4	3	1	P35579	N7(Deamidated)	1654.77	0	4.416e-05	High	2.25024	0	High	3.88684	0	High	2.62445	0	High	3.6501	0	0
	GALALEEKR	6	3	1	P35579		986.563	0	0.006124	High	2.24679	0	High	2.64405	0	High	2.28307	0	High	2.34389	0	1
	YKASITALEAK	7	3	1	P35579		1194.67	0	0.0003984	High	2.23472	0	High	2.6826	0	High	2.78842	0	High	3.78953	0	1
	YEILTPNSIPK	8	4	1	P35579		1274.7	0	0.009709	High	2.23257	0	High	3.22091	0	High	2.07882	0	High	3.11671	0	0
	EDQSILCTGESGAGKTENTK	4	21	4	P35580;P35580-2;Q7Z406-6;P35579	C7(Carbamidomethyl)	2124.97	0	8.893e-06	High	2.22203	0	High	4.70129	0	High	2.02241	0	High	3.72079	0	1
	QLEEAEEEAQR	8	3	1	P35579	Q1(Deamidated)	1332.59	0	0.0005357	High	2.22147	0	High	3.36729	0	High	2.93194	0	High	3.05205	0	0
	QIATLHAQVADMK	7	2	1	P35579	Q8(Deamidated); M12(Oxidation)	1442.73	0	0.000152	High	2.20158	0	High	3.56112	0	High	2.47823	0	High	3.66767	0	0
	EMEAELEDER	18	3	1	P35579	M2(Oxidation)	1266.52	0	0.006223	High	2.19923	0	High	2.66145	0	High	1.95986	0	High	2.56115	0	0
	MQQNIQELEEQLEEEESAR	3	4	1	P35579	Q2(Deamidated); Q6(Deamidated)	2335.03	0	0.001067	High	2.19033	0										0
	KLQKDLEGLSQR	4	1	1	P35579		1414.8	0	0.0006599	High	2.18684	0				High	2.80113	0	High	3.12436	0	2
	FLSNGHVTIPGQQDKDMFQETMEAMR	3	4	1	P35579	Q12(Deamidated)	3011.4	0	0.000104	High	2.18163	0	High	5.35912	0				High	4.76406	0	1
	ELESQISELQEDLESER	6	3	1	P35579	Q10(Deamidated)	2034.94	0	0.0009221	High	2.16837	0	High	3.37225	0	High	3.38022	0	High	3.64764	0	0
	QRYEILTPNSIPK	5	4	1	P35579		1558.86	0	0.002487	High	2.16777	0	High	3.60926	0	High	2.6319	0	High	3.12797	0	1
	TEMEDLMSSK	4	4	1	P35579		1170.5	0	0.009188	High	2.14862	0	High	2.98239	0	High	2.02282	0	High	2.94027	0	0
	VLLQGKGDSEHKR	3	2	1	P35579	Q4(Deamidated)	1467.79	0	0.0008701	High	2.1408	0				High	1.77196	0				2
	LDPHLVLDQLR	2	9	3	P35580;P35580-2;P35579	Q9(Deamidated)	1319.73	0	0.0004516	High	2.08741	0							High	2.42227	0	0
	ELEDATETADAMNREVSSLKNK	3	3	1	P35579		2451.17	0	0.0003595	High	2.07277	0	High	4.08044	0				High	4.50256	0	2
	TEMEDLMSSKDDVGKSVHELEK	5	3	1	P35579	M3(Oxidation)	2523.16	0	0.003866	High	2.06781	0				High	2.19945	0	High	3.96562	0	2
	GDLPFVVPR	9	3	1	P35579		999.562	0	0.001634	High	2.00698	0	High	2.4938	0	High	1.54606	0	High	2.56685	0	0
	RQLEEAEEEAQRANASR	5	3	1	P35579		1986.96	0	0.005386	High	1.98817	0	High	3.07863	0	High	2.36796	0	High	3.32614	0	2
	SGFEPASLKEEVGEEAIVELVENGKK	10	5	1	P35579	N23(Deamidated)	2789.41	0	4.722e-06	High	1.97144	0	High	4.5748	0	High	3.98197	0	High	5.92014	0	2
	IMGIPEEEQMGLLR	3	4	1	P35579	Q9(Deamidated)	1616.8	0	0.002423	High	1.94918	0	High	3.57911	0							0
	QLEEAEEEAQRANASR	11	3	1	P35579	N13(Deamidated)	1831.84	0	0.005996	High	1.93149	0	High	2.68251	0	High	2.1466	0	High	2.623	0	1
	ALEQQVEEMK	4	3	1	P35579		1204.59	0	0.00609	High	1.90731	0	High	2.85083	0	High	2.07818	0	High	3.29357	0	0
	EMEAELEDERKQR	6	3	1	P35579		1662.78	0	0.02197	High	1.84578	0	High	2.20632	0	High	1.71992	0	High	1.99988	0	2
	QLEEAEEEAQRANASR	4	3	1	P35579		1830.86	0	0.001423	High	1.74808	0				High	1.94277	0	High	2.54465	0	1
	VLLQGKGDSEHKR	5	2	1	P35579		1466.81	0	0.0005599	High	1.37227	0				High	2.40467	0				2
	DVDRIIGLDQVAGMSETALPGAFK	7	4	1	P35579		2503.29	0	5.74e-05				High	6.33043	0	High	4.56506	0	High	6.34257	0	1
	LQVELDNVTGLLSQSDSKSSK	4	2	1	P35579		2248.17	0	2.967e-06				High	6.31558	0				High	5.4283	0	1
	TRLQQELDDLLVDLDHQR	1	1	1	P35579		2207.15	0	0.0001504				High	6.10629	0							1
	LQLQEQLQAETELCAEAEELR	9	4	1	P35579	C14(Carbamidomethyl)	2501.22	0	5.035e-06				High	6.05571	0				High	5.84742	0	0
	INFDVNGYIVGANIETYLLEK	3	4	1	P35579		2385.23	0	0.002538				High	5.83912	0				High	5.51251	0	0
	SMMQDREDQSILCTGESGAGKTENTK	6	5	1	P35579	Q9(Deamidated); C13(Carbamidomethyl)	2874.26	0	2.077e-06				High	5.8306	0				High	5.45578	0	2
	TELEDTLDSTAAQQELR	3	2	1	P35579		1919.92	0	1.04e-07				High	5.64197	0	High	3.50791	0				0
	SGFEPASLKEEVGEEAIVELVENGKK	7	5	1	P35579		2788.43	0	6.698e-07				High	5.1822	0	High	2.30978	0	High	6.10116	0	2
	QLLQANPILEAFGNAK	1	15	2	Q7Z406-6;P35579	Q1(Deamidated); Q4(Deamidated); N6(Deamidated); N14(Deamidated)	1730.87	0	0.004924				High	5.12003	0							0
	MEDSVGCLETAEEVKR	5	1	1	P35579	M1(Oxidation); C7(Carbamidomethyl)	1868.84	0	1.923e-07				High	4.94969	0				High	4.78095	0	1
	SMMQDREDQSILCTGESGAGK	7	5	1	P35579	Q9(Deamidated); C13(Carbamidomethyl)	2300.98	0	1.942e-05				High	4.89532	0				High	4.85862	0	1
	TFHIFYYLLSGAGEHLK	9	4	1	P35579		1996.03	0	4.491e-05				High	4.81507	0							0
	IAEFTTNLTEEEEKSK	6	3	1	P35579	N7(Deamidated)	1869.9	0	3.994e-06				High	4.78682	0	High	3.75008	0	High	5.17207	0	1
	KMEDSVGCLETAEEVK	3	1	1	P35579	C8(Carbamidomethyl)	1824.84	0	0.002313				High	4.72835	0				High	3.50502	0	1
	QAQQERDELADEIANSSGKGALALEEK	5	3	1	P35579		2900.42	0	9.8e-07				High	4.67336	0	High	3.95428	0	High	7.37354	0	2
	IIGLDQVAGMSETALPGAFK	7	4	1	P35579	Q6(Deamidated)	2019.05	0	1.009e-06				High	4.58279	0	High	3.32415	0	High	4.6118	0	0
	KVIQYLAYVASSHK	3	6	1	P35579		1606.9	0	0.0005949				High	4.57162	0							1
	NTDQASMPDNTAAQK	7	9	1	P35579		1591.7	0	1.73e-05				High	4.53506	0	High	3.71553	0	High	4.80491	0	0
	QAQQERDELADEIANSSGK	12	3	1	P35579	Q1(Deamidated); Q3(Deamidated)	2090.95	0	0.001586				High	4.44549	0				High	4.83998	0	1
	RQLEEAEEEAQR	4	3	1	P35579	Q11(Deamidated)	1488.69	0	0.0009648				High	4.42884	0				High	3.92413	0	1
	VISGVLQLGNIVFK	6	4	1	P35579		1486.9	0	0.0001463				High	4.41758	0				High	3.17802	0	0
	NTDQASMPDNTAAQK	10	9	1	P35579	M7(Oxidation); N10(Deamidated)	1608.68	0	0.001592				High	4.34942	0				High	3.442	0	0
	VEDMAELTCLNEASVLHNLK	2	12	3	P35580;P35580-2;P35579	C9(Carbamidomethyl)	2286.11	0	2.569e-06				High	4.3016	0				High	5.31487	0	0
	TELEDTLDSTAAQQELR	8	2	1	P35579	Q14(Deamidated)	1920.91	0	2.071e-05				High	4.16937	0	High	3.01781	0	High	3.626	0	0
	SMMQDREDQSILCTGESGAGKTENTK	5	5	1	P35579	M3(Oxidation); Q4(Deamidated); C13(Carbamidomethyl)	2890.25	0	0.004465				High	4.13907	0	High	2.68081	0	High	3.8123	0	2
	NMDPLNDNIATLLHQSSDKFVSELWK	1	4	1	P35579	M2(Oxidation)	3031.48	0	0.001811				High	4.06652	0							1
	EDQSILCTGESGAGKTENTKK	6	21	4	P35580;P35580-2;Q7Z406-6;P35579	C7(Carbamidomethyl); N18(Deamidated)	2254.05	0	0.008447				High	4.01336	0				High	3.29092	0	2
	RNAEQYKDQADK	2	3	1	P35579		1465.71	0	0.01057				High	3.90497	0				High	3.82329	0	2
	LTKDFSALESQLQDTQELLQEENR	9	2	1	P35579	Q20(Deamidated)	2836.38	0	0.0003518				High	3.89533	0				High	4.5502	0	1
	VRTELADKVTK	7	2	1	P35579		1259.73	0	0.006287				High	3.70277	0	High	2.40462	0	High	3.47019	0	2
	KRHEMPPHIYAITDTAYR	4	5	1	P35579		2199.12	0	0.0001202				High	3.64397	0							2
	LQQELDDLLVDLDHQR	2	1	1	P35579	Q2(Deamidated)	1950.99	0	0.01201				High	3.59362	0							0
	VISGVLQLGNIVFKK	6	4	1	P35579	N10(Deamidated)	1615.98	0	0.0002892				High	3.56631	0	High	2.93341	0	High	3.59724	0	1
	ERNTDQASMPDNTAAQK	12	9	1	P35579	N3(Deamidated)	1877.83	0	0.001616				High	3.56097	0	High	1.73807	0	High	3.0104	0	1
	NFINNPLAQADWAAKK	3	5	1	P35579		1800.94	0	3.263e-05				High	3.53777	0	High	2.7519	0	High	4.12357	0	1
	ALEEAMEQK	2	3	1	P35579	Q8(Deamidated)	1049.48	0	0.02286				High	3.44495	0				High	2.84417	0	0
	HSQAVEELAEQLEQTK	4	2	1	P35579	Q14(Deamidated)	1840.89	0	0.005737				High	3.39651	0	High	2.6312	0	High	3.98406	0	0
	QIATLHAQVADMK	6	2	1	P35579	Q8(Deamidated)	1426.74	0	2.477e-05				High	3.31742	0	High	2.64817	0	High	3.73075	0	0
	FLSNGHVTIPGQQDKDMFQETMEAMR	1	4	1	P35579		3010.39	0	0.01206				High	3.26445	0							1
	EQLEEEEEAKHNLEK	4	2	1	P35579	N12(Deamidated)	1855.85	0	0.002139				High	3.2026	0	High	2.74778	0	High	3.03257	0	1
	CNGVLEGIR	4	21	4	P35580;P35580-2;Q7Z406-6;P35579	C1(Carbamidomethyl); N2(Deamidated)	1018.5	0	0.001351				High	3.13211	0				High	2.85787	0	0
	RGDLPFVVPR	3	3	1	P35579		1155.66	0	0.00289				High	3.11453	0	High	2.68962	0	High	3.28782	0	1
	ASREEILAQAK	2	3	1	P35579	Q9(Deamidated)	1216.65	0	0.001174				High	3.0992	0				High	3.19531	0	1
	HEAMITDLEER	3	3	1	P35579		1343.63	0	8.338e-05				High	2.98759	0				High	3.24941	0	0
	EEILAQAKENEK	4	3	1	P35579	Q6(Deamidated)	1402.71	0	0.003764				High	2.86936	0				High	3.1986	0	1
	LRLEVNLQAMK	4	3	1	P35579		1314.76	0	0.01241				High	2.81891	0				High	4.00142	0	1
	LQLQEQLQAETELCAEAEELR	6	4	1	P35579	Q4(Deamidated); C14(Carbamidomethyl)	2502.21	0	0.0001801				High	2.72722	0				High	3.53495	0	0
	QLEEAEEEAQR	1	3	1	P35579	Q1(Deamidated); Q10(Deamidated)	1333.57	0	0.01149				High	2.50751	0							0
	KRHEMPPHIYAITDTAYR	1	5	1	P35579	M5(Oxidation)	2215.11	0	0.005451				High	2.45547	0							2
	ELEDATETADAMNR	3	3	1	P35579	N13(Deamidated)	1566.66	0	1.782e-05				High	2.31859	0	High	3.20789	0	High	3.83297	0	0
	DMFQETMEAMR	1	4	1	P35579	M7(Oxidation); M10(Oxidation)	1420.56	0	0.003111				High	2.24315	0							0
	KLEGDSTDLSDQIAELQAQIAELK	2	3	1	P35579		2615.34	0	2.067e-06							High	4.15467	0	High	6.37137	0	1
	ALEQQVEEMKTQLEELEDELQATEDAK	1	3	1	P35579	Q4(Deamidated); M9(Oxidation); Q21(Deamidated)	3165.47	0	0.001056							High	3.90088	0				1
	SGFEPASLKEEVGEEAIVELVENGK	3	5	1	P35579	N23(Deamidated)	2661.31	0	4.038e-08							High	3.50486	0	High	5.65333	0	1
	VEDMAELTCLNEASVLHNLKER	2	4	1	P35579	M4(Oxidation); C9(Carbamidomethyl)	2587.25	0	4.714e-05							High	3.33584	0	High	4.09398	0	1
	TLEEEAKTHEAQIQEMR	7	2	1	P35579	Q12(Deamidated)	2043.97	0	7.08e-06							High	3.22875	0	High	4.3394	0	1
	KMQQNIQELEEQLEEEESAR	6	3	1	P35579	Q3(Deamidated)	2462.14	0	0.0003568							High	3.22818	0	High	6.11451	0	1
	YLYVDKNFINNPLAQADWAAK	4	5	1	P35579	N10(Deamidated)	2455.23	0	0.0002083							High	3.13279	0	High	4.43837	0	1
	IAQLEEELEEEQGNTELINDR	2	3	1	P35579	Q3(Deamidated); N14(Deamidated); N19(Deamidated)	2475.14	0	0.001297							High	3.06492	0				0
	LTKDFSALESQLQDTQELLQEENR	4	2	1	P35579		2835.4	0	7.913e-08							High	2.96926	0	High	6.75794	0	1
	EEILAQAKENEKK	2	3	1	P35579	Q6(Deamidated)	1530.8	0	0.001444							High	2.93204	0				2
	IAQLEEQLDNETKER	3	3	1	P35579	Q7(Deamidated); N10(Deamidated)	1817.87	0	1.814e-05							High	2.83363	0	High	4.74879	0	1
	QKKFDQLLAEEK	4	7	3	P35580;P35580-2;P35579		1476.81	0	0.005605							High	2.73356	0	High	3.71835	0	2
	TLEEEAKTHEAQIQEMR	2	2	1	P35579	Q12(Deamidated); M16(Oxidation)	2059.96	0	0.0001945							High	2.71123	0				1
	FLSNGHVTIPGQQDKDMFQETMEAMR	2	4	1	P35579	N4(Deamidated); Q13(Deamidated)	3012.37	0	0.0002297							High	2.69278	0				1
	FLSNGHVTIPGQQDKDMFQETMEAMR	3	4	1	P35579	M25(Oxidation)	3026.38	0	0.0002158							High	2.6537	0	High	4.72437	0	1
	VEEEAAQKNMALKK	1	3	1	P35579		1588.84	0	0.0003963							High	2.49577	0				2
	DFSALESQLQDTQELLQEENRQK	9	2	1	P35579	N20(Deamidated); Q22(Deamidated)	2751.29	0	8.651e-05							High	2.31508	0	High	3.55748	0	1
	NLPIYSEEIVEMYKGK	1	4	1	P35579		1912.97	0	0.001383							High	2.11565	0				1
	GAGDGSDEEVDGKADGAEAKPAE	2	3	1	P35579		2174.93	0	0.001512							High	1.95441	0	High	3.50928	0	1
	KKMQQNIQELEEQLEEEESAR	4	3	1	P35579	M3(Oxidation)	2605.24	0	0.001486							High	1.92744	0	High	3.92686	0	2
	KMEDSVGCLETAEEVK	2	1	1	P35579	M2(Oxidation); C8(Carbamidomethyl)	1840.83	0	0.001385							High	1.65455	0	High	3.86241	0	1
	KMQQNIQELEEQLEEEESAR	1	3	1	P35579		2461.15	0	5.998e-08										High	6.06459	0	1
	QEEEMMAKEEELVKVR	2	4	1	P35579		1977.96	0	3.327e-05										High	4.80198	0	2
	INFDVNGYIVGANIETYLLEK	1	4	1	P35579	N13(Deamidated)	2386.23	0	0.0001156										High	4.74536	0	0
	SMMQDREDQSILCTGESGAGKTENTK	2	5	1	P35579	Q4(Deamidated); C13(Carbamidomethyl); N24(Deamidated)	2875.26	0	0.001049										High	4.74339	0	2
	QEEEMMAKEEELVKVR	2	4	1	P35579	M6(Oxidation)	1993.96	0	4.333e-05										High	4.39901	0	2
	KFDQLLAEEKTISAK	1	2	1	P35579		1720.95	0	0.000328										High	4.26105	0	2
	DKADFCIIHYAGK	1	9	3	P35580;P35580-2;P35579	C6(Carbamidomethyl)	1537.75	0	0.000109										High	4.12224	0	1
	KLKSMEAEMIQLQEELAAAER	1	3	1	P35579	M5(Oxidation); M9(Oxidation)	2450.23	0	0.0002072										High	3.9669	0	2
	VEAQLQELQVKFNEGER	1	2	1	P35579	Q9(Deamidated)	2018.02	0	0.0001414										High	3.94483	0	1
	QEEEMMAKEEELVK	1	4	1	P35579	Q1(Deamidated)	1723.77	0	0.001567										High	3.9415	0	1
	MEDSVGCLETAEEVK	1	1	1	P35579	M1(Oxidation); C7(Carbamidomethyl)	1712.74	0	1.114e-05										High	3.83394	0	0
	KLQAQMKDCMR	1	3	1	P35579	Q3(Deamidated); C9(Carbamidomethyl)	1409.67	0	0.00306										High	3.30707	0	2
	EQADFAIEALAK	1	11	2	Q7Z406-6;P35579	Q2(Deamidated)	1306.65	0	0.00183										High	3.22643	0	0
	EEELQAALAR	1	14	2	Q7Z406-6;P35579		1129.58	0	0.0002254										High	3.06747	0	0
	VEEEAAQKNMALK	1	3	1	P35579		1460.74	0	0.006405										High	3.02579	0	1
	LQLQEQLQAETELCAEAEELRAR	1	4	1	P35579	C14(Carbamidomethyl)	2728.36	0	0.001072										High	3.00269	0	1
	KFDQLLAEEK	2	21	4	P35580;P35580-2;Q7Z406-6;P35579	Q4(Deamidated)	1221.64	0	0.00559										High	2.97789	0	1
	DMFQETMEAMR	1	4	1	P35579		1388.57	0	0.0008356										High	2.63371	0	0
	DVLLQVDDERR	1	3	1	P35579	Q5(Deamidated)	1358.69	0	0.002032										High	2.14372	0	1
	SKREQEVNILK	3	2	1	P35579		1343.76	0.001	0.007259	High	3.0536	0				High	2.51575	0	High	2.91464	0	2
	EQADFAIEALAKATYER	2	11	2	Q7Z406-6;P35579		1925.96	0.001	0.002504	High	3.04573	0				High	2.24771	0				1
	LEVNLQAMK	19	3	1	P35579	M8(Oxidation)	1061.57	0.001	0.04076	High	2.7036	0	High	2.95348	0	High	2.32671	0	High	2.88814	0	0
	RQAQQERDELADEIANSSGK	5	3	1	P35579	N16(Deamidated)	2246.07	0.001	0.01332	High	2.54766	0							High	2.75239	0	2
	QVEDEKNSFR	4	2	1	P35579		1251.6	0.001	0.01003	High	2.45754	0	High	2.55732	0	High	1.91967	0	High	2.58212	0	1
	TELADKVTK	4	2	1	P35579		1004.56	0.001	0.005311	High	2.34317	0	High	2.923	0	High	2.24279	0				1
	QLEEAEEEAQRANASRR	3	3	1	P35579		1986.96	0.001	0.008082	High	2.2373	0				High	1.50787	0				2
	LEVNLQAMK	5	3	1	P35579		1045.57	0.001	0.01025	High	2.22367	0	High	2.68782	0	High	2.20723	0	High	2.85426	0	0
	IMGIPEEEQMGLLR	2	4	1	P35579	M2(Oxidation); Q9(Deamidated)	1632.79	0.001	0.006065	High	2.18019	0				High	2.22778	0				0
	QEEEMMAKEEELVK	11	4	1	P35579	M5(Oxidation); M6(Oxidation)	1754.78	0.001	0.01738	High	2.13137	0	High	2.78727	0	High	2.43125	0	High	3.18799	0	1
	LEVNLQAMK	8	3	1	P35579	Q6(Deamidated)	1046.56	0.001	0.01229	High	2.11482	0	High	2.72337	0	High	2.14547	0	High	2.48919	0	0
	FLSNGHVTIPGQQDK	3	4	1	P35579		1640.84	0.001	0.007334	High	2.09728	0	High	2.87278	0				High	3.15126	0	0
	VAAYDKLEK	4	1	1	P35579		1036.57	0.001	0.01928	High	2.07314	0	High	2.32426	0	High	2.35233	0	High	2.69125	0	1
	ALEEAMEQK	4	3	1	P35579		1048.5	0.001	0.03965	High	2.03957	0	High	3.16166	0	High	2.36476	0	High	3.03566	0	0
	EEILAQAKENEKK	4	3	1	P35579		1529.82	0.001	0.02004	High	1.99579	0	High	2.86691	0	High	2.61758	0	High	2.29661	0	2
	VLLQGKGDSEHK	2	2	1	P35579	Q4(Deamidated)	1311.69	0.001	0.0105	High	1.90914	0				High	2.09245	0				1
	EQEVNILKK	6	2	1	P35579		1100.63	0.001	0.02325	High	1.84759	0	High	2.75747	0	High	1.86182	0	High	2.97369	0	1
	QIATLHAQVADMKK	3	2	1	P35579	Q8(Deamidated); M12(Oxidation)	1570.83	0.001	0.01306	High	1.78918	0				High	2.32476	0	High	2.05326	0	1
	EMEAELEDERKQR	8	3	1	P35579	M2(Oxidation)	1678.77	0.001	0.01896	High	1.77701	0				High	1.79299	0	High	2.20637	0	2
	DEAIKQLR	1	3	1	P35579		972.547	0.001	0.006839	High	1.63538	0										1
	SFVEKVMQEQGTHPK	2	4	1	P35579	M7(Oxidation)	1760.86	0.001	0.003311	High	1.57972	0				High	2.39469	0				1
	LQEMEGTVK	29	3	1	P35579	M4(Oxidation)	1050.51	0.001	0.04415	High	1.5536	0	High	2.61823	0	High	1.66218	0	High	2.49343	0	0
	DLGEELEALK	4	8	1	P35579		1116.58	0.001	0.02674	High	1.38945	0	High	2.62453	0				High	2.77923	0	0
	VKPLLQVSR	4	4	1	P35579		1039.66	0.001	0.01783	High	1.27289	0	High	2.28717	0	High	1.85348	0	High	2.13969	0	0
	FLSNGHVTIPGQQDK	5	4	1	P35579	N4(Deamidated)	1641.83	0.001	0.02788				High	3.66818	0				High	3.54368	0	0
	QRYEILTPNSIPK	5	4	1	P35579	N9(Deamidated)	1559.84	0.001	0.03875				High	3.65232	0	High	2.50265	0	High	3.73275	0	1
	LKNKHEAMITDLEER	1	3	1	P35579		1826.94	0.001	0.02432				High	3.48148	0							2
	ALEEAMEQK	18	3	1	P35579	M6(Oxidation)	1064.49	0.001	0.0246				High	3.09725	0				High	2.97813	0	0
	QLEEAEEEAQRANASRR	1	3	1	P35579	N13(Deamidated)	1987.94	0.001	0.04687				High	2.81965	0							2
	EQEVNILKK	3	2	1	P35579	N5(Deamidated)	1101.61	0.001	0.01834				High	2.56837	0	High	1.92243	0	High	2.67423	0	1
	DLEGLSQR	3	1	1	P35579		917.469	0.001	0.03783				High	2.50468	0	High	1.75932	0	High	2.37615	0	0
	QLEEAEEEAQRANASR	2	3	1	P35579	Q1(Deamidated); Q10(Deamidated)	1832.83	0.001	0.03545				High	2.42473	0				High	2.1328	0	1
	LKKLEEEQIILEDQNCK	2	3	1	P35579	N15(Deamidated); C16(Carbamidomethyl)	2131.1	0.001	0.008835							High	3.63665	0				2
	SMMQDREDQSILCTGESGAGKTENTK	2	5	1	P35579	M2(Oxidation); M3(Oxidation); Q4(Deamidated); C13(Carbamidomethyl); N24(Deamidated)	2907.26	0.001	0.01469							High	3.61534	0				2
	NRDEAIKQLR	1	3	1	P35579	Q8(Deamidated)	1243.68	0.001	0.001921							High	3.22056	0				2
	KMQQNIQELEEQLEEEESAR	3	3	1	P35579	M2(Oxidation); Q12(Deamidated)	2478.14	0.001	0.002339							High	2.96651	0				1
	TQLEELEDELQATEDAKLR	1	16	3	P35580;P35580-2;P35579	Q11(Deamidated)	2232.09	0.001	0.00202							High	2.94341	0				1
	KMQQNIQELEEQLEEEESAR	4	3	1	P35579	M2(Oxidation); Q3(Deamidated); N5(Deamidated)	2479.13	0.001	0.005002							High	2.94201	0				1
	QKLQLEKVTTEAK	2	9	2	Q7Z406-6;P35579	Q4(Deamidated)	1516.86	0.001	0.01644							High	2.89293	0	High	3.36283	0	2
	REQEVNILKK	1	2	1	P35579		1256.73	0.001	0.005988							High	2.66533	0				2
	QGFPNRVVFQEFR	2	4	1	P35579		1623.84	0.001	0.01206							High	2.20298	0	High	2.45293	0	1
	LTEMETLQSQLMAEK	1	4	1	P35579	M4(Oxidation); Q10(Deamidated); M12(Oxidation)	1784.83	0.001	0.008052							High	2.14607	0				0
	QEEEMMAKEEELVKVR	1	4	1	P35579	M5(Oxidation); M6(Oxidation)	2009.95	0.001	0.01543							High	2.11409	0				2
	KLQAQMKDCMR	1	3	1	P35579	C9(Carbamidomethyl)	1408.69	0.001	0.004888							High	2.0242	0				2
	EMEAELEDERKQR	2	3	1	P35579	Q12(Deamidated)	1663.76	0.001	0.003131							High	1.88826	0	High	2.38632	0	2
	VEEEEERCQHLQAEK	2	3	1	P35579	C8(Carbamidomethyl)	1913.87	0.001	0.02167							High	1.79979	0	High	2.67594	0	1
	ELESQISELQEDLESER	1	3	1	P35579	Q5(Deamidated); Q10(Deamidated)	2035.94	0.001	0.01073										High	3.7883	0	0
	NFINNPLAQADWAAKK	1	5	1	P35579	Q9(Deamidated)	1801.92	0.001	0.02186										High	3.11067	0	1
	SKYKASITALEAK	1	3	1	P35579		1409.8	0.001	0.02325										High	2.93267	0	2
	QFRTEMEDLMSSKDDVGK	1	3	1	P35579	M10(Oxidation)	2131.96	0.001	0.01048										High	2.54003	0	2
	QLAAENRLTEMETLQSQLMAEK	1	4	1	P35579	M11(Oxidation); M19(Oxidation)	2566.25	0.002	0.009232	High	2.61622	0										1
	QIATLHAQVADMKKK	2	2	1	P35579	Q8(Deamidated); M12(Oxidation)	1698.92	0.002	0.02524	High	2.39535	0				High	2.38554	0				2
	VEEEAAQKNMALK	2	3	1	P35579	M10(Oxidation)	1476.74	0.002	0.02895	High	2.10929	0				High	1.85859	0				1
	LQEMEGTVK	4	3	1	P35579		1034.52	0.002	0.06431	High	2.09164	0	High	2.46626	0	High	2.04787	0	High	2.47199	0	0
	THEAQIQEMR	5	2	1	P35579	M9(Oxidation)	1258.58	0.002	0.02968	High	1.76167	0				High	1.74379	0	High	2.10134	0	0
	VVFQEFR	3	4	1	P35579	Q4(Deamidated)	925.478	0.002	0.0356	High	1.61327	0				High	1.50495	0	High	2.06558	0	0
	NTNPNFVR	6	9	3	P35580;P35580-2;P35579	N5(Deamidated)	962.469	0.002	0.03028	High	1.43175	0	High	2.31341	0	High	1.27678	0	High	2.51423	0	0
	QFRTEMEDLMSSK	3	4	1	P35579	M6(Oxidation); M10(Oxidation)	1633.72	0.002	0.06814				High	2.69701	0	High	2.02337	0	High	2.47751	0	1
	ALEQQVEEMK	5	3	1	P35579	M9(Oxidation)	1220.58	0.002	0.0314				High	2.30953	0	High	1.61196	0	High	2.17694	0	0
	DLEGLSQR	3	1	1	P35579	Q7(Deamidated)	918.453	0.002	0.02742				High	2.3041	0	High	1.51225	0	High	2.40109	0	0
	NTNPNFVR	3	9	3	P35580;P35580-2;P35579		961.485	0.002	0.06378				High	2.21982	0							0
	QLAAENRLTEMETLQSQLMAEK	2	4	1	P35579	M11(Oxidation); Q15(Deamidated)	2551.23	0.002	0.04425							High	3.12308	0	High	3.83757	0	1
	LEVNLQAMKAQFER	1	3	1	P35579	M8(Oxidation); Q11(Deamidated)	1693.86	0.002	0.02409							High	2.24327	0				1
	DLEGLSQRHEEK	2	1	1	P35579	Q7(Deamidated)	1441.69	0.002	0.03717							High	1.62748	0				1
	VLLQGKGDSEHK	1	2	1	P35579		1310.71	0.002	0.02758							High	1.56352	0				1
	ALEQQVEEMK	1	3	1	P35579	Q5(Deamidated)	1205.57	0.002	0.03645										High	2.51921	0	0
	LQLEKVTTEAK	1	9	2	Q7Z406-6;P35579		1259.72	0.003	0.01468	High	3.04569	0										1
	FDQLLAEEKTISAK	1	2	1	P35579		1592.85	0.003	0.01433	High	2.70156	0										1
	NAEQYKDQADK	1	3	1	P35579		1309.6	0.003	0.02177	High	2.3301	0										1
	SGFEPASLK	2	5	1	P35579		935.484	0.003	0.04552	High	2.29626	0				High	2.01721	0				0
	NMDPLNDNIATLLHQSSDKFVSELWK	1	4	1	P35579		3015.49	0.003	0.0919				High	4.07507	0							1
	ANLQIDQINTDLNLER	2	3	1	P35579	N2(Deamidated); Q4(Deamidated); Q7(Deamidated); N9(Deamidated)	1873.9	0.003	0.07117				High	3.35458	0							0
	LKDVLLQVDDERR	1	3	1	P35579	Q7(Deamidated)	1599.87	0.003	0.0788				High	2.88341	0							2
	TEMEDLMSSK	5	4	1	P35579	M7(Oxidation)	1186.5	0.003	0.1008				High	2.39619	0				High	2.11159	0	0
	QEEEMMAKEEELVKVR	1	4	1	P35579	Q1(Deamidated); M5(Oxidation); M6(Oxidation)	2010.95	0.003	0.04872							High	2.07079	0				2
	QFRTEMEDLMSSKDDVGK	1	3	1	P35579		2115.97	0.003	0.04712										High	2.57049	0	2
	VVFQEFR	6	4	1	P35579		924.494	0.004	0.0624	High	1.78778	0	High	1.73242	0	High	1.66512	0	High	1.66549	0	0
	QACVLMIK	2	4	1	P35579	C3(Carbamidomethyl)	962.516	0.004	0.08215				High	2.35995	0				High	2.06785	0	0
	FLSNGHVTIPGQQDKDMFQETMEAMR	2	4	1	P35579	Q13(Deamidated); Q19(Deamidated); M25(Oxidation)	3028.36	0.004	0.05263							High	2.85285	0				1
	GALALEEK	2	3	1	P35579		830.461	0.004	0.05219							High	2.1323	0	High	2.32897	0	0
	MNPPKFSK	2	24	5	P35580;P35580-2;Q7Z406-6;P35579;Q4G140	M1(Oxidation)	964.492	0.004	0.05858							High	1.27781	0				1
	ASITALEAK	3	3	1	P35579		903.515	0.005	0.07948				High	2.8574	0	High	2.59286	0	High	2.88208	0	0
	CIIPNHEK	2	14	3	P35580;P35580-2;P35579	C1(Carbamidomethyl)	1010.51	0.005	0.07692				High	1.91506	0	High	1.54229	0				0
	FVSELWK	2	4	1	P35579		908.487	0.005	0.06507							High	1.3982	0				0
	QKHSQAVEELAEQLEQTK	1	2	1	P35579		2096.06	0.005	0.09138										High	2.98911	0	1
	KLEMDLK	1	3	1	P35579		876.486	0.005	0.09629										High	2.18711	0	1
	ADEWLMK	4	9	3	P35580;P35580-2;P35579	M6(Oxidation)	908.418	0.006	0.119							High	1.80263	0	High	2.27411	0	0
	QQQLTAMK	1	9	1	P35579	Q3(Deamidated)	948.481	0.006	0.1225										High	1.79828	0	0
	NRDEAIKQLR	1	3	1	P35579		1242.69	0.007	0.05522	High	2.48577	0										2
	LMATLRNTNPNFVR	1	9	3	P35580;P35580-2;P35579	M2(Oxidation); N9(Deamidated)	1663.86	0.007	0.05496	High	1.99835	0										1
	CIIPNHEKK	1	4	1	P35579	C1(Carbamidomethyl)	1138.6	0.007	0.04956	High	1.80611	0										1
	LVWVPSDK	2	5	1	P35579		943.525	0.008	0.1151	High	1.87985	0				High	1.8679	0				0
	EQLEEEEEAK	1	2	1	P35579		1233.55	0.008	0.1909				High	2.16424	0							0
	EQEVNILK	1	2	1	P35579		972.536	0.008	0.1871				High	2.04527	0							0
	VEEEEERCQHLQAEK	1	3	1	P35579	C8(Carbamidomethyl); Q12(Deamidated)	1914.85	0.008	0.1025							High	1.69044	0				1
	YAEERDRAEAEAR	1	8	3	P35580;P35580-2;P35579		1565.73	0.008	0.1067							High	1.06166	0				2
	KANLQIDQINTDLNLER	1	3	1	P35579	N3(Deamidated); N14(Deamidated)	2000.05	0.008	0.1444										High	3.23744	0	1
	QACVLMIK	1	4	1	P35579	C3(Carbamidomethyl); M6(Oxidation)	978.511	0.008	0.162										High	2.42508	0	0
	MNPPKFSK	1	24	5	P35580;P35580-2;Q7Z406-6;P35579;Q4G140		948.497	0.008	0.1528										High	1.98215	0	1
Q53G99	Beta actin variant (Fragment) OS=Homo sapiens PE=2 SV=1 - [Q53G99_HUMAN]	1613.52	74.13	27	572	2488.19	81.33	34	644	1991.92	78.4	34	742	2315.65	85.6	36	642	375	41.7378	5.59229
	Sequence	# PSMs	# Proteins	# Protein Groups	Protein Group Accessions	Modifications	MH+ [Da]	q-Value	PEP	A2	XCorr A2	Probability A2	B2	XCorr B2	Probability B2	C2	XCorr C2	Probability C2	D2	XCorr D2	Probability D2	# Missed Cleavages
	TTGIVMDSGDGVTHTVPIYEGYALPHAILR	66	26	4	B4DW52;Q53G99;Q562M3;Q562L9		3183.62	0	2.28e-08	High	5.69941	0	High	6.84825	0	High	5.56485	0	High	7.1496	0	0
	KDLYANTVLSGGTTMYPGIADR	31	20	3	B4DW52;V9HVZ7;Q53G99		2343.17	0	2.234e-06	High	5.5575	0	High	6.87612	0	High	5.82285	0	High	6.71086	0	1
	KDLYANTVLSGGTTMYPGIADR	60	20	3	B4DW52;V9HVZ7;Q53G99	M15(Oxidation)	2359.16	0	2.498e-07	High	5.14747	0	High	7.31421	0	High	6.00967	0	High	7.00324	0	1
	HQGVMVGMGQKDSYVGDEAQSKR	33	36	3	P68133;Q53G99;E7EVS6	M5(Oxidation); Q10(Deamidated)	2524.16	0	4.625e-08	High	5.1283	0	High	4.90407	0	High	5.41769	0	High	5.70317	0	2
	TTGIVMDSGDGVTHTVPIYEGYALPHAILR	51	26	4	B4DW52;Q53G99;Q562M3;Q562L9	M6(Oxidation)	3199.61	0	4.867e-08	High	5.12793	0	High	6.59852	0	High	5.46817	0	High	7.41024	0	0
	DLYANTVLSGGTTMYPGIADR	148	20	3	B4DW52;V9HVZ7;Q53G99		2215.07	0	4.675e-08	High	5.11073	0	High	6.36246	0	High	4.73762	0	High	6.61827	0	0
	DLYANTVLSGGTTMYPGIADR	136	20	3	B4DW52;V9HVZ7;Q53G99	M14(Oxidation)	2231.06	0	2.82e-07	High	4.95064	0	High	6.54891	0	High	5.15736	0	High	6.03523	0	0
	KDLYANTVLSGGTTMYPGIADR	11	20	3	B4DW52;V9HVZ7;Q53G99	N6(Deamidated)	2344.17	0	1.222e-06	High	4.80765	0	High	5.00222	0	High	4.88651	0	High	5.62612	0	1
	HQGVMVGMGQKDSYVGDEAQSKR	26	36	3	P68133;Q53G99;E7EVS6	M5(Oxidation); M8(Oxidation)	2539.17	0	3.151e-08	High	4.73824	0	High	4.27711	0	High	4.04097	0	High	6.67189	0	2
	LCYVALDFEQEMATAASSSSLEK	50	20	3	B4DW52;V9HVZ7;Q53G99	C2(Carbamidomethyl)	2550.18	0	2.006e-06	High	4.71528	0	High	6.7592	0	High	4.29854	0	High	6.44484	0	0
	DLYANTVLSGGTTMYPGIADR	35	20	3	B4DW52;V9HVZ7;Q53G99	N5(Deamidated); M14(Oxidation)	2232.05	0	1.85e-06	High	4.68722	0	High	5.82645	0	High	4.47884	0	High	5.12619	0	0
	HQGVMVGMGQKDSYVGDEAQSKR	45	36	3	P68133;Q53G99;E7EVS6	M8(Oxidation)	2523.17	0	2.319e-08	High	4.6854	0	High	4.86585	0	High	5.11233	0	High	6.4165	0	2
	HQGVMVGMGQKDSYVGDEAQSKR	16	36	3	P68133;Q53G99;E7EVS6		2507.17	0	3.059e-09	High	4.61868	0	High	5.85761	0	High	5.69678	0	High	7.27916	0	2
	HQGVMVGMGQKDSYVGDEAQSKR	23	36	3	P68133;Q53G99;E7EVS6	M5(Oxidation); M8(Oxidation); Q10(Deamidated)	2540.15	0	3.546e-07	High	4.53194	0	High	4.21916	0	High	4.53324	0	High	5.67533	0	2
	KDLYANTVLSGGTTMYPGIADR	14	20	3	B4DW52;V9HVZ7;Q53G99	N6(Deamidated); M15(Oxidation)	2360.17	0	4.462e-05	High	4.50197	0	High	7.20634	0	High	4.32034	0	High	5.49908	0	1
	DLYANTVLSGGTTMYPGIADR	27	20	3	B4DW52;V9HVZ7;Q53G99	N5(Deamidated)	2216.05	0	7.834e-09	High	4.42439	0	High	6.01441	0	High	4.8822	0	High	6.14966	0	0
	HQGVMVGMGQKDSYVGDEAQSK	42	36	3	P68133;Q53G99;E7EVS6	M8(Oxidation)	2367.07	0	2.833e-06	High	4.36113	0	High	6.02709	0	High	4.15251	0	High	6.01417	0	1
	HQGVMVGMGQKDSYVGDEAQSK	12	36	3	P68133;Q53G99;E7EVS6	Q10(Deamidated)	2352.06	0	1.515e-08	High	4.26798	0	High	5.59481	0	High	5.01862	0	High	6.33728	0	1
	LCYVALDFEQEMATAASSSSLEK	16	20	3	B4DW52;V9HVZ7;Q53G99	C2(Carbamidomethyl); Q10(Deamidated); M12(Oxidation)	2567.15	0	7.356e-07	High	4.24058	0	High	5.48659	0	High	3.47318	0	High	5.79799	0	0
	HQGVMVGMGQKDSYVGDEAQSK	33	36	3	P68133;Q53G99;E7EVS6	M8(Oxidation); Q10(Deamidated)	2368.06	0	2.417e-06	High	4.18358	0	High	5.28913	0	High	4.4582	0	High	5.95198	0	1
	LCYVALDFEQEMATAASSSSLEK	65	20	3	B4DW52;V9HVZ7;Q53G99	C2(Carbamidomethyl); M12(Oxidation)	2566.17	0	1.8e-07	High	4.14237	0	High	6.10792	0	High	4.49685	0	High	6.17228	0	0
	VAPEEHPVLLTEAPLNPK	301	29	5	B4DW52;Q53G99;E7EVS6;Q562Z4;Q562L9		1954.07	0	1.575e-06	High	4.09127	0	High	5.18816	0	High	3.77656	0	High	5.11746	0	0
	HQGVMVGMGQKDSYVGDEAQSKR	3	36	3	P68133;Q53G99;E7EVS6	Q2(Deamidated); M5(Oxidation); Q10(Deamidated)	2525.14	0	2.642e-05	High	4.02596	0							High	6.08721	0	2
	HQGVMVGMGQKDSYVGDEAQSK	37	36	3	P68133;Q53G99;E7EVS6	M5(Oxidation); M8(Oxidation)	2383.06	0	4.998e-06	High	3.98858	0	High	5.71112	0	High	4.39968	0	High	5.46798	0	1
	SYELPDGQVITIGNER	48	40	7	Q562R1;Q9BYX7;P68133;B4DUI8;B4DW52;V9HVZ7;Q53G99	N14(Deamidated)	1791.88	0	2.023e-06	High	3.89053	0	High	4.89359	0	High	3.93667	0	High	4.74047	0	0
	HQGVMVGMGQKDSYVGDEAQSK	16	36	3	P68133;Q53G99;E7EVS6	Q2(Deamidated); M5(Oxidation); M8(Oxidation)	2384.06	0	0.0001159	High	3.82536	0	High	5.06506	0	High	3.0325	0	High	5.36605	0	1
	CPEALFQPSFLGMESCGIHETTFNSIMK	4	19	3	B4DW52;V9HVZ7;Q53G99	C1(Carbamidomethyl); M13(Oxidation); C16(Carbamidomethyl); N24(Deamidated); M27(Oxidation)	3264.45	0	0.001289	High	3.81553	0				High	2.50703	0				0
	YPIEHGIVTNWDDMEK	3	19	2	Q53G99;E7EVS6		1946.9	0	1.332e-06	High	3.78346	0				High	3.14378	0	High	4.50324	0	0
	HQGVMVGMGQKDSYVGDEAQSK	15	36	3	P68133;Q53G99;E7EVS6		2351.08	0	5.975e-05	High	3.75407	0	High	5.76996	0	High	4.32654	0	High	5.47726	0	1
	QEYDESGPSIVHR	23	22	6	Q9BYX7;P0CG38;B4DW52;V9HVZ7;Q53G99;L0R5C4		1516.7	0	9.456e-06	High	3.70989	0	High	4.11519	0	High	3.63909	0	High	4.45321	0	0
	SYELPDGQVITIGNER	201	40	7	Q562R1;Q9BYX7;P68133;B4DUI8;B4DW52;V9HVZ7;Q53G99		1790.89	0	0.0006453	High	3.69497	0	High	4.36043	0	High	3.65867	0	High	4.58082	0	0
	VAPEEHPVLLTEAPLNPK	10	29	5	B4DW52;Q53G99;E7EVS6;Q562L9;Q562Z4	N16(Deamidated)	1955.05	0	3.837e-08	High	3.69461	0	High	4.73338	0	High	3.2215	0	High	4.91855	0	0
	LCYVALDFEQEMATAASSSSLEK	17	20	3	B4DW52;V9HVZ7;Q53G99	C2(Carbamidomethyl); Q10(Deamidated)	2551.18	0	3.374e-05	High	3.52483	0	High	5.273	0	High	3.71318	0	High	4.63014	0	0
	EKLCYVALDFEQEMATAASSSSLEK	5	20	3	B4DW52;V9HVZ7;Q53G99	C4(Carbamidomethyl)	2807.32	0	1.754e-06	High	3.50515	0	High	4.01751	0	High	3.73134	0	High	5.74342	0	1
	QEYDESGPSIVHR	8	22	6	Q9BYX7;P0CG38;B4DW52;V9HVZ7;Q53G99;L0R5C4	Q1(Deamidated)	1517.69	0	3.843e-05	High	3.37417	0	High	3.81006	0	High	3.168	0	High	3.92199	0	0
	CDVDIRKDLYANTVLSGGTTMYPGIADR	5	20	3	B4DW52;V9HVZ7;Q53G99	C1(Carbamidomethyl)	3101.5	0	3.848e-05	High	3.26749	0	High	4.94407	0	High	4.25646	0	High	5.605	0	2
	EKLCYVALDFEQEMATAASSSSLEK	3	20	3	B4DW52;V9HVZ7;Q53G99	C4(Carbamidomethyl); M14(Oxidation)	2823.31	0	5.977e-07	High	3.18146	0				High	4.74977	0	High	5.09491	0	1
	IWHHTFYNELR	11	67	10	Q9BYX7;P68133;P0CG38;B4DW52;Q53G99;E7EVS6;L0R5C4;Q562M3;Q562W2;Q562U0		1515.75	0	0.001517	High	3.06769	0	High	3.62082	0	High	1.87793	0	High	2.58829	0	0
	SYELPDGQVITIGNER	10	40	7	Q562R1;Q9BYX7;P68133;B4DUI8;B4DW52;V9HVZ7;Q53G99	Q8(Deamidated); N14(Deamidated)	1792.86	0	0.0001875	High	3.05595	0	High	4.94249	0	High	3.55466	0	High	4.757	0	0
	CPEALFQPSFLGMESCGIHETTFNSIMK	5	19	3	B4DW52;V9HVZ7;Q53G99	C1(Carbamidomethyl); M13(Oxidation); C16(Carbamidomethyl); M27(Oxidation)	3263.45	0	0.003959	High	3.05232	0				High	2.89747	0	High	3.53282	0	0
	CPEALFQPSFLGMESCGIHETTFNSIMK	4	19	3	B4DW52;V9HVZ7;Q53G99	C1(Carbamidomethyl); Q7(Deamidated); C16(Carbamidomethyl)	3232.46	0	4.07e-05	High	2.97359	0	High	5.01916	0	High	3.25534	0				0
	HQGVMVGMGQK	83	38	4	Q562R1;P68133;Q53G99;E7EVS6	M5(Oxidation); M8(Oxidation)	1203.56	0	0.01544	High	2.90849	0	High	3.07082	0	High	2.59864	0	High	2.85045	0	0
	AVFPSIVGRPR	175	44	5	P68133;P0CG38;B4DW52;Q53G99;E7EVS6		1198.71	0	0.002069	High	2.90617	0	High	3.41803	0	High	2.61863	0	High	2.9895	0	0
	ILTERGYSFTTTAER	7	16	3	B4DW52;V9HVZ7;Q53G99		1744.89	0	0.001435	High	2.8767	0	High	3.37614	0	High	2.95559	0	High	3.90075	0	1
	HQGVMVGMGQK	8	38	4	Q562R1;P68133;Q53G99;E7EVS6	Q10(Deamidated)	1172.56	0	6.886e-05	High	2.87227	0	High	3.93724	0	High	2.807	0	High	4.05806	0	0
	HQGVMVGMGQK	70	38	4	Q562R1;P68133;Q53G99;E7EVS6	M5(Oxidation)	1187.57	0	0.01142	High	2.85527	0	High	3.40253	0	High	2.8711	0	High	3.35089	0	0
	AGFAGDDAPR	39	46	6	P68133;P0CG38;B4DW52;Q53G99;E7EVS6;L0R5C4		976.45	0	0.002165	High	2.82474	0	High	3.07533	0	High	2.78709	0	High	3.28298	0	0
	EITALAPSTMK	80	34	4	P68133;B4DUI8;B4DW52;Q53G99		1161.62	0	0.004824	High	2.77506	0	High	2.81269	0	High	2.90885	0	High	3.27379	0	0
	HQGVMVGMGQK	24	38	4	Q562R1;P68133;Q53G99;E7EVS6		1171.57	0	0.0001699	High	2.71339	0	High	3.90103	0	High	3.06248	0	High	3.79448	0	0
	QEYDESGPSIVHRK	18	22	6	Q9BYX7;P0CG38;B4DW52;V9HVZ7;Q53G99;L0R5C4		1644.8	0	0.0004709	High	2.69773	0	High	3.72013	0	High	3.01093	0	High	4.38804	0	1
	EITALAPSTMK	87	34	4	P68133;B4DUI8;B4DW52;Q53G99	M10(Oxidation)	1177.61	0	0.004045	High	2.6693	0	High	2.66314	0	High	2.71699	0	High	2.69447	0	0
	HQGVMVGMGQK	4	38	4	Q562R1;P68133;Q53G99;E7EVS6	Q2(Deamidated); Q10(Deamidated)	1173.54	0	0.000128	High	2.62673	0	High	4.02216	0	High	2.80104	0	High	4.06698	0	0
	GYSFTTTAER	36	16	3	B4DW52;V9HVZ7;Q53G99		1132.53	0	0.01251	High	2.60855	0	High	2.79368	0	High	2.58032	0	High	2.69039	0	0
	DSYVGDEAQSK	13	37	4	P68133;B4DUI8;Q53G99;E7EVS6		1198.52	0	0.02167	High	2.58193	0	High	2.77143	0	High	2.40651	0	High	2.84557	0	0
	LDLAGRDLTDYLMK	37	31	6	Q562R1;P68133;B4DUI8;B4DW52;V9HVZ7;Q53G99	M13(Oxidation)	1639.84	0	0.01495	High	2.56464	0	High	3.10169	0	High	2.95064	0	High	3.51532	0	1
	EITALAPSTMKIK	7	34	4	P68133;B4DUI8;B4DW52;Q53G99		1402.8	0	0.001055	High	2.542	0	High	3.70921	0	High	2.49089	0	High	3.30251	0	1
	DSYVGDEAQSKR	59	37	4	P68133;B4DUI8;Q53G99;E7EVS6		1354.62	0	0.007687	High	2.54018	0	High	3.70746	0	High	2.80167	0	High	3.2065	0	1
	LDLAGRDLTDYLMK	26	31	6	Q562R1;P68133;B4DUI8;B4DW52;V9HVZ7;Q53G99		1623.84	0	0.000225	High	2.51799	0	High	3.22354	0	High	2.69802	0	High	3.90678	0	1
	DSYVGDEAQSK	4	37	4	P68133;B4DUI8;Q53G99;E7EVS6	Q9(Deamidated)	1199.51	0	0.005115	High	2.45953	0	High	3.00255	0	High	2.12723	0	High	3.05841	0	0
	DSYVGDEAQSKR	15	37	4	P68133;B4DUI8;Q53G99;E7EVS6	Q9(Deamidated)	1355.61	0	0.01791	High	2.44698	0	High	3.86373	0	High	2.60612	0	High	3.26181	0	1
	CPEALFQPSFLGMESCGIHETTFNSIMK	6	19	3	B4DW52;V9HVZ7;Q53G99	C1(Carbamidomethyl); C16(Carbamidomethyl); M27(Oxidation)	3247.45	0	0.0002759	High	2.32514	0				High	2.17986	0	High	5.63379	0	0
	SYELPDGQVITIGNERFR	5	40	7	Q562R1;Q9BYX7;P68133;B4DUI8;B4DW52;V9HVZ7;Q53G99	N14(Deamidated)	2095.05	0	0.001793	High	2.31578	0				High	2.27835	0	High	3.29428	0	1
	EITALAPSTMKIK	7	34	4	P68133;B4DUI8;B4DW52;Q53G99	M10(Oxidation)	1418.79	0	0.002759	High	1.93712	0	High	3.43761	0	High	2.56173	0	High	2.91552	0	1
	GYSFTTTAEREIVR	18	16	3	B4DW52;V9HVZ7;Q53G99		1629.82	0	0.001648	High	1.76542	0	High	2.81229	0	High	2.32781	0	High	2.86924	0	1
	MTQIMFETFNTPAMYVAIQAVLSLYASGR	2	29	6	B4DW52;Q53G99;E7EVS6;Q562M3;Q562Z4;Q562L9	M5(Oxidation); Q19(Deamidated)	3270.61	0	0.0003908				High	6.79079	0							0
	MTQIMFETFNTPAMYVAIQAVLSLYASGR	1	29	6	B4DW52;Q53G99;E7EVS6;Q562M3;Q562Z4;Q562L9		3253.61	0	3.946e-05				High	6.52669	0							0
	HQGVMVGMGQKDSYVGDEAQSKR	17	36	3	P68133;Q53G99;E7EVS6	Q10(Deamidated)	2508.16	0	5.861e-09				High	5.63725	0	High	5.20272	0	High	6.35843	0	2
	FRCPEALFQPSFLGMESCGIHETTFNSIMK	4	19	3	B4DW52;V9HVZ7;Q53G99	C3(Carbamidomethyl); C18(Carbamidomethyl); M29(Oxidation)	3550.63	0	0.003972				High	5.23997	0							1
	FRCPEALFQPSFLGMESCGIHETTFNSIMK	3	19	3	B4DW52;V9HVZ7;Q53G99	C3(Carbamidomethyl); C18(Carbamidomethyl)	3534.64	0	0.00131				High	5.11663	0							1
	VAPEEHPVLLTEAPLNPKANR	3	27	5	B4DW52;Q53G99;E7EVS6;Q562Z4;Q562L9		2295.25	0	0.0001416				High	4.69413	0				High	3.57703	0	1
	CPEALFQPSFLGMESCGIHETTFNSIMK	4	19	3	B4DW52;V9HVZ7;Q53G99	C1(Carbamidomethyl); C16(Carbamidomethyl)	3231.46	0	1.984e-05				High	4.57656	0				High	5.75561	0	0
	CPEALFQPSFLGMESCGIHETTFNSIMK	1	19	3	B4DW52;V9HVZ7;Q53G99	C1(Carbamidomethyl); Q7(Deamidated); C16(Carbamidomethyl); N24(Deamidated)	3233.46	0	0.002345				High	4.50283	0							0
	KEITALAPSTMK	5	1	1	Q53G99		1289.72	0	0.0001816				High	3.99648	0				High	3.60723	0	1
	HQGVMVGMGQKDSYVGDEAQSKR	3	36	3	P68133;Q53G99;E7EVS6	Q2(Deamidated); Q10(Deamidated)	2509.14	0	3.002e-09				High	3.35912	0	High	3.45781	0	High	6.41366	0	2
	LDLAGRDLTDYLMKILTER	1	31	6	Q562R1;P68133;B4DUI8;B4DW52;V9HVZ7;Q53G99		2236.2	0	0.003754				High	3.20336	0							2
	HQGVMVGMGQKDSYVGDEAQSKR	2	36	3	P68133;Q53G99;E7EVS6	M5(Oxidation); M8(Oxidation); Q10(Deamidated); Q20(Deamidated)	2541.14	0	3.046e-07							High	5.76153	0	High	4.66154	0	2
	CDVDIRKDLYANTVLSGGTTMYPGIADR	4	20	3	B4DW52;V9HVZ7;Q53G99	C1(Carbamidomethyl); M21(Oxidation)	3117.5	0	0.0009736							High	4.49688	0	High	6.00461	0	2
	VAPEEHPVLLTEAPLNPKANR	1	27	5	B4DW52;Q53G99;E7EVS6;Q562Z4;Q562L9	N20(Deamidated)	2296.23	0	0.0006282							High	3.22906	0				1
	VAPEEHPVLLTEAPLNPKANREK	3	24	5	B4DW52;Q53G99;E7EVS6;Q562L9;Q562Z4		2552.38	0	0.0008506							High	1.97313	0	High	4.89195	0	2
	HQGVMVGMGQKDSYVGDEAQSK	2	36	3	P68133;Q53G99;E7EVS6	Q2(Deamidated); Q10(Deamidated)	2353.04	0	0.001579							High	1.77996	0	High	3.75648	0	1
	MTQIMFETFNTPAMYVAIQAVLSLYASGR	2	28	5	B4DW52;Q53G99;E7EVS6;Q562M3;Q562L9	Q3(Deamidated)	3254.62	0	0.0001647										High	5.59637	0	0
	FRCPEALFQPSFLGMESCGIHETTFNSIMK	1	19	3	B4DW52;V9HVZ7;Q53G99	C3(Carbamidomethyl); Q9(Deamidated); C18(Carbamidomethyl)	3535.64	0	0.004304										High	5.34255	0	1
	CDVDIRKDLYANTVLSGGTTMYPGIADR	1	20	3	B4DW52;V9HVZ7;Q53G99	C1(Carbamidomethyl); N12(Deamidated)	3102.51	0	0.00195										High	4.33604	0	2
	QEYDESGPSIVHRK	1	22	6	Q9BYX7;P0CG38;B4DW52;V9HVZ7;Q53G99;L0R5C4	Q1(Deamidated)	1645.78	0	0.002478										High	2.6851	0	1
	CDVDIRKDLYANTVLSGGTTMYPGIADR	2	20	3	B4DW52;V9HVZ7;Q53G99	C1(Carbamidomethyl); N12(Deamidated); M21(Oxidation)	3118.49	0.001	0.005384	High	3.50763	0				High	2.8859	0				2
	CPEALFQPSFLGMESCGIHETTFNSIMK	6	19	3	B4DW52;V9HVZ7;Q53G99	C1(Carbamidomethyl); M13(Oxidation); C16(Carbamidomethyl); N24(Deamidated)	3248.46	0.001	0.01361	High	2.96117	0	High	4.49554	0	High	2.03459	0				0
	IKIIAPPERK	4	34	6	Q562R1;P68133;B4DUI8;B4DW52;V9HVZ7;Q53G99		1164.75	0.001	0.03352				High	2.43487	0	High	1.88886	0	High	2.73133	0	2
	HQGVMVGMGQK	4	38	4	Q562R1;P68133;Q53G99;E7EVS6	Q2(Deamidated); M5(Oxidation)	1188.55	0.001	0.008599							High	3.18076	0	High	3.45201	0	0
	EKLCYVALDFEQEMATAASSSSLEK	1	20	3	B4DW52;V9HVZ7;Q53G99	C4(Carbamidomethyl); Q12(Deamidated)	2808.3	0.001	0.002169							High	2.48479	0				1
	EITALAPSTMKIKIIAPPER	1	32	4	P68133;B4DUI8;B4DW52;Q53G99		2179.25	0.001	0.009118										High	3.42633	0	2
	DLTDYLMK	8	31	6	Q562R1;P68133;B4DUI8;B4DW52;V9HVZ7;Q53G99	M7(Oxidation)	1014.48	0.002	0.03301				High	2.49493	0	High	2.26647	0	High	1.91396	0	0
	EKLCYVALDFEQEMATAASSSSLEK	2	20	3	B4DW52;V9HVZ7;Q53G99	C4(Carbamidomethyl); Q12(Deamidated); M14(Oxidation)	2824.29	0.004	0.02432	High	3.43772	0				High	2.09698	0				1
	DLTDYLMK	8	31	6	Q562R1;P68133;B4DUI8;B4DW52;V9HVZ7;Q53G99		998.486	0.004	0.05801				High	2.39491	0	High	1.85033	0	High	1.54934	0	0
	IKIIAPPER	3	35	6	Q562R1;P68133;B4DUI8;B4DW52;V9HVZ7;Q53G99		1036.65	0.004	0.08078				High	2.37811	0	High	2.09943	0	High	2.85645	0	1
	EIVRDIKEK	1	35	6	P68133;P0CG38;B4DUI8;B4DW52;V9HVZ7;Q53G99		1129.66	0.004	0.05584							High	1.83167	0				2
	EKMTQIMFETFNTPAMYVAIQAVLSLYASGR	1	28	6	B4DW52;Q53G99;E7EVS6;Q562M3;Q562Z4;Q562L9	M3(Oxidation); M7(Oxidation); N12(Deamidated); M16(Oxidation)	3559.73	0.007	0.1668				High	3.11594	0							1
	CDVDIRK	1	21	4	Q562R1;B4DW52;V9HVZ7;Q53G99	C1(Carbamidomethyl)	905.451	0.009	0.1325							High	1.75704	0				1
B4DW52	cDNA FLJ55253, highly similar to Actin, cytoplasmic 1 OS=Homo sapiens PE=2 SV=1 - [B4DW52_HUMAN]	1442.77	69.74	23	508	2394.14	86.74	32	613	1718.76	74.35	30	642	1829.43	86.74	34	497	347	38.6082	5.35107
	Sequence	# PSMs	# Proteins	# Protein Groups	Protein Group Accessions	Modifications	MH+ [Da]	q-Value	PEP	A2	XCorr A2	Probability A2	B2	XCorr B2	Probability B2	C2	XCorr C2	Probability C2	D2	XCorr D2	Probability D2	# Missed Cleavages
	TTGIVMDSGDGVTHTVPIYEGYALPHAILR	66	26	4	B4DW52;Q53G99;Q562M3;Q562L9		3183.62	0	2.28e-08	High	5.69941	0	High	6.84825	0	High	5.56485	0	High	7.1496	0	0
	KDLYANTVLSGGTTMYPGIADR	31	20	3	B4DW52;V9HVZ7;Q53G99		2343.17	0	2.234e-06	High	5.5575	0	High	6.87612	0	High	5.82285	0	High	6.71086	0	1
	KDLYANTVLSGGTTMYPGIADR	60	20	3	B4DW52;V9HVZ7;Q53G99	M15(Oxidation)	2359.16	0	2.498e-07	High	5.14747	0	High	7.31421	0	High	6.00967	0	High	7.00324	0	1
	TTGIVMDSGDGVTHTVPIYEGYALPHAILR	51	26	4	B4DW52;Q53G99;Q562M3;Q562L9	M6(Oxidation)	3199.61	0	4.867e-08	High	5.12793	0	High	6.59852	0	High	5.46817	0	High	7.41024	0	0
	DLYANTVLSGGTTMYPGIADR	148	20	3	B4DW52;V9HVZ7;Q53G99		2215.07	0	4.675e-08	High	5.11073	0	High	6.36246	0	High	4.73762	0	High	6.61827	0	0
	DLYANTVLSGGTTMYPGIADR	136	20	3	B4DW52;V9HVZ7;Q53G99	M14(Oxidation)	2231.06	0	2.82e-07	High	4.95064	0	High	6.54891	0	High	5.15736	0	High	6.03523	0	0
	KDLYANTVLSGGTTMYPGIADR	11	20	3	B4DW52;V9HVZ7;Q53G99	N6(Deamidated)	2344.17	0	1.222e-06	High	4.80765	0	High	5.00222	0	High	4.88651	0	High	5.62612	0	1
	LCYVALDFEQEMATAASSSSLEK	50	20	3	B4DW52;V9HVZ7;Q53G99	C2(Carbamidomethyl)	2550.18	0	2.006e-06	High	4.71528	0	High	6.7592	0	High	4.29854	0	High	6.44484	0	0
	DLYANTVLSGGTTMYPGIADR	35	20	3	B4DW52;V9HVZ7;Q53G99	N5(Deamidated); M14(Oxidation)	2232.05	0	1.85e-06	High	4.68722	0	High	5.82645	0	High	4.47884	0	High	5.12619	0	0
	KDLYANTVLSGGTTMYPGIADR	14	20	3	B4DW52;V9HVZ7;Q53G99	N6(Deamidated); M15(Oxidation)	2360.17	0	4.462e-05	High	4.50197	0	High	7.20634	0	High	4.32034	0	High	5.49908	0	1
	DLYANTVLSGGTTMYPGIADR	27	20	3	B4DW52;V9HVZ7;Q53G99	N5(Deamidated)	2216.05	0	7.834e-09	High	4.42439	0	High	6.01441	0	High	4.8822	0	High	6.14966	0	0
	LCYVALDFEQEMATAASSSSLEK	16	20	3	B4DW52;V9HVZ7;Q53G99	C2(Carbamidomethyl); Q10(Deamidated); M12(Oxidation)	2567.15	0	7.356e-07	High	4.24058	0	High	5.48659	0	High	3.47318	0	High	5.79799	0	0
	LCYVALDFEQEMATAASSSSLEK	65	20	3	B4DW52;V9HVZ7;Q53G99	C2(Carbamidomethyl); M12(Oxidation)	2566.17	0	1.8e-07	High	4.14237	0	High	6.10792	0	High	4.49685	0	High	6.17228	0	0
	VAPEEHPVLLTEAPLNPK	301	29	5	B4DW52;Q53G99;E7EVS6;Q562Z4;Q562L9		1954.07	0	1.575e-06	High	4.09127	0	High	5.18816	0	High	3.77656	0	High	5.11746	0	0
	SYELPDGQVITIGNER	48	40	7	Q562R1;Q9BYX7;P68133;B4DUI8;B4DW52;V9HVZ7;Q53G99	N14(Deamidated)	1791.88	0	2.023e-06	High	3.89053	0	High	4.89359	0	High	3.93667	0	High	4.74047	0	0
	CPEALFQPSFLGMESCGIHETTFNSIMK	4	19	3	B4DW52;V9HVZ7;Q53G99	C1(Carbamidomethyl); M13(Oxidation); C16(Carbamidomethyl); N24(Deamidated); M27(Oxidation)	3264.45	0	0.001289	High	3.81553	0				High	2.50703	0				0
	QEYDESGPSIVHR	23	22	6	Q9BYX7;P0CG38;B4DW52;V9HVZ7;Q53G99;L0R5C4		1516.7	0	9.456e-06	High	3.70989	0	High	4.11519	0	High	3.63909	0	High	4.45321	0	0
	SYELPDGQVITIGNER	201	40	7	Q562R1;Q9BYX7;P68133;B4DUI8;B4DW52;V9HVZ7;Q53G99		1790.89	0	0.0006453	High	3.69497	0	High	4.36043	0	High	3.65867	0	High	4.58082	0	0
	VAPEEHPVLLTEAPLNPK	10	29	5	B4DW52;Q53G99;E7EVS6;Q562L9;Q562Z4	N16(Deamidated)	1955.05	0	3.837e-08	High	3.69461	0	High	4.73338	0	High	3.2215	0	High	4.91855	0	0
	MQKEITALAPSTMK	42	33	3	P68133;B4DUI8;B4DW52	Q2(Deamidated); M13(Oxidation)	1565.79	0	0.0004245	High	3.69018	0	High	4.43341	0	High	3.44291	0	High	4.06087	0	1
	LCYVALDFEQEMATAASSSSLEK	17	20	3	B4DW52;V9HVZ7;Q53G99	C2(Carbamidomethyl); Q10(Deamidated)	2551.18	0	3.374e-05	High	3.52483	0	High	5.273	0	High	3.71318	0	High	4.63014	0	0
	MQKEITALAPSTMK	52	33	3	P68133;B4DUI8;B4DW52		1548.81	0	1.623e-06	High	3.50712	0	High	4.5718	0	High	3.60939	0	High	4.67859	0	1
	EKLCYVALDFEQEMATAASSSSLEK	5	20	3	B4DW52;V9HVZ7;Q53G99	C4(Carbamidomethyl)	2807.32	0	1.754e-06	High	3.50515	0	High	4.01751	0	High	3.73134	0	High	5.74342	0	1
	QEYDESGPSIVHR	8	22	6	Q9BYX7;P0CG38;B4DW52;V9HVZ7;Q53G99;L0R5C4	Q1(Deamidated)	1517.69	0	3.843e-05	High	3.37417	0	High	3.81006	0	High	3.168	0	High	3.92199	0	0
	MQKEITALAPSTMK	8	33	3	P68133;B4DUI8;B4DW52	Q2(Deamidated)	1549.8	0	6.151e-07	High	3.34993	0	High	4.70444	0	High	3.63512	0	High	4.80906	0	1
	CDVDIRKDLYANTVLSGGTTMYPGIADR	5	20	3	B4DW52;V9HVZ7;Q53G99	C1(Carbamidomethyl)	3101.5	0	3.848e-05	High	3.26749	0	High	4.94407	0	High	4.25646	0	High	5.605	0	2
	MQKEITALAPSTMK	78	33	3	P68133;B4DUI8;B4DW52	M13(Oxidation)	1564.81	0	1.66e-05	High	3.23866	0	High	4.61899	0	High	3.60954	0	High	4.48774	0	1
	EKLCYVALDFEQEMATAASSSSLEK	3	20	3	B4DW52;V9HVZ7;Q53G99	C4(Carbamidomethyl); M14(Oxidation)	2823.31	0	5.977e-07	High	3.18146	0				High	4.74977	0	High	5.09491	0	1
	IWHHTFYNELR	11	67	10	Q9BYX7;P68133;P0CG38;B4DW52;Q53G99;E7EVS6;L0R5C4;Q562M3;Q562W2;Q562U0		1515.75	0	0.001517	High	3.06769	0	High	3.62082	0	High	1.87793	0	High	2.58829	0	0
	SYELPDGQVITIGNER	10	40	7	Q562R1;Q9BYX7;P68133;B4DUI8;B4DW52;V9HVZ7;Q53G99	Q8(Deamidated); N14(Deamidated)	1792.86	0	0.0001875	High	3.05595	0	High	4.94249	0	High	3.55466	0	High	4.757	0	0
	CPEALFQPSFLGMESCGIHETTFNSIMK	5	19	3	B4DW52;V9HVZ7;Q53G99	C1(Carbamidomethyl); M13(Oxidation); C16(Carbamidomethyl); M27(Oxidation)	3263.45	0	0.003959	High	3.05232	0				High	2.89747	0	High	3.53282	0	0
	MQKEITALAPSTMK	5	33	3	P68133;B4DUI8;B4DW52	M1(Oxidation); Q2(Deamidated); M13(Oxidation)	1581.78	0	3.647e-05	High	2.97663	0	High	3.15146	0	High	3.26873	0	High	4.50935	0	1
	CPEALFQPSFLGMESCGIHETTFNSIMK	4	19	3	B4DW52;V9HVZ7;Q53G99	C1(Carbamidomethyl); Q7(Deamidated); C16(Carbamidomethyl)	3232.46	0	4.07e-05	High	2.97359	0	High	5.01916	0	High	3.25534	0				0
	AVFPSIVGRPR	175	44	5	P68133;P0CG38;B4DW52;Q53G99;E7EVS6		1198.71	0	0.002069	High	2.90617	0	High	3.41803	0	High	2.61863	0	High	2.9895	0	0
	ILTERGYSFTTTAER	7	16	3	B4DW52;V9HVZ7;Q53G99		1744.89	0	0.001435	High	2.8767	0	High	3.37614	0	High	2.95559	0	High	3.90075	0	1
	MQKEITALAPSTMK	65	33	3	P68133;B4DUI8;B4DW52	M1(Oxidation); M13(Oxidation)	1580.8	0	1.83e-05	High	2.84942	0	High	4.10771	0	High	3.41788	0	High	3.9648	0	1
	AGFAGDDAPR	39	46	6	P68133;P0CG38;B4DW52;Q53G99;E7EVS6;L0R5C4		976.45	0	0.002165	High	2.82474	0	High	3.07533	0	High	2.78709	0	High	3.28298	0	0
	EITALAPSTMK	80	34	4	P68133;B4DUI8;B4DW52;Q53G99		1161.62	0	0.004824	High	2.77506	0	High	2.81269	0	High	2.90885	0	High	3.27379	0	0
	QEYDESGPSIVHRK	18	22	6	Q9BYX7;P0CG38;B4DW52;V9HVZ7;Q53G99;L0R5C4		1644.8	0	0.0004709	High	2.69773	0	High	3.72013	0	High	3.01093	0	High	4.38804	0	1
	EITALAPSTMK	87	34	4	P68133;B4DUI8;B4DW52;Q53G99	M10(Oxidation)	1177.61	0	0.004045	High	2.6693	0	High	2.66314	0	High	2.71699	0	High	2.69447	0	0
	GYSFTTTAER	36	16	3	B4DW52;V9HVZ7;Q53G99		1132.53	0	0.01251	High	2.60855	0	High	2.79368	0	High	2.58032	0	High	2.69039	0	0
	LDLAGRDLTDYLMK	37	31	6	Q562R1;P68133;B4DUI8;B4DW52;V9HVZ7;Q53G99	M13(Oxidation)	1639.84	0	0.01495	High	2.56464	0	High	3.10169	0	High	2.95064	0	High	3.51532	0	1
	EITALAPSTMKIK	7	34	4	P68133;B4DUI8;B4DW52;Q53G99		1402.8	0	0.001055	High	2.542	0	High	3.70921	0	High	2.49089	0	High	3.30251	0	1
	LDLAGRDLTDYLMK	26	31	6	Q562R1;P68133;B4DUI8;B4DW52;V9HVZ7;Q53G99		1623.84	0	0.000225	High	2.51799	0	High	3.22354	0	High	2.69802	0	High	3.90678	0	1
	CPEALFQPSFLGMESCGIHETTFNSIMK	6	19	3	B4DW52;V9HVZ7;Q53G99	C1(Carbamidomethyl); C16(Carbamidomethyl); M27(Oxidation)	3247.45	0	0.0002759	High	2.32514	0				High	2.17986	0	High	5.63379	0	0
	SYELPDGQVITIGNERFR	5	40	7	Q562R1;Q9BYX7;P68133;B4DUI8;B4DW52;V9HVZ7;Q53G99	N14(Deamidated)	2095.05	0	0.001793	High	2.31578	0				High	2.27835	0	High	3.29428	0	1
	DLYANTVLSGGTTMYPGIADRMQK	3	19	2	B4DW52;V9HVZ7	M22(Oxidation); Q23(Deamidated)	2619.25	0	0.0004125	High	2.0164	0				High	2.91233	0	High	4.9401	0	1
	EITALAPSTMKIK	7	34	4	P68133;B4DUI8;B4DW52;Q53G99	M10(Oxidation)	1418.79	0	0.002759	High	1.93712	0	High	3.43761	0	High	2.56173	0	High	2.91552	0	1
	GYSFTTTAEREIVR	18	16	3	B4DW52;V9HVZ7;Q53G99		1629.82	0	0.001648	High	1.76542	0	High	2.81229	0	High	2.32781	0	High	2.86924	0	1
	MTQIMFETFNTPAMYVAIQAVLSLYASGR	2	29	6	B4DW52;Q53G99;E7EVS6;Q562M3;Q562Z4;Q562L9	M5(Oxidation); Q19(Deamidated)	3270.61	0	0.0003908				High	6.79079	0							0
	MTQIMFETFNTPAMYVAIQAVLSLYASGR	1	29	6	B4DW52;Q53G99;E7EVS6;Q562M3;Q562Z4;Q562L9		3253.61	0	3.946e-05				High	6.52669	0							0
	DLYANTVLSGGTTMYPGIADRMQK	2	19	2	B4DW52;V9HVZ7	M14(Oxidation); M22(Oxidation); Q23(Deamidated)	2635.24	0	0.0003246				High	5.31483	0				High	4.54996	0	1
	FRCPEALFQPSFLGMESCGIHETTFNSIMK	4	19	3	B4DW52;V9HVZ7;Q53G99	C3(Carbamidomethyl); C18(Carbamidomethyl); M29(Oxidation)	3550.63	0	0.003972				High	5.23997	0							1
	FRCPEALFQPSFLGMESCGIHETTFNSIMK	3	19	3	B4DW52;V9HVZ7;Q53G99	C3(Carbamidomethyl); C18(Carbamidomethyl)	3534.64	0	0.00131				High	5.11663	0							1
	VAPEEHPVLLTEAPLNPKANR	3	27	5	B4DW52;Q53G99;E7EVS6;Q562Z4;Q562L9		2295.25	0	0.0001416				High	4.69413	0				High	3.57703	0	1
	CPEALFQPSFLGMESCGIHETTFNSIMK	4	19	3	B4DW52;V9HVZ7;Q53G99	C1(Carbamidomethyl); C16(Carbamidomethyl)	3231.46	0	1.984e-05				High	4.57656	0				High	5.75561	0	0
	CPEALFQPSFLGMESCGIHETTFNSIMK	1	19	3	B4DW52;V9HVZ7;Q53G99	C1(Carbamidomethyl); Q7(Deamidated); C16(Carbamidomethyl); N24(Deamidated)	3233.46	0	0.002345				High	4.50283	0							0
	HQGVMVGIVTNWDDMEKIWHHTFYNELR	2	1	1	B4DW52	M15(Oxidation)	3471.66	0	0.01174				High	4.41237	0							1
	HQGVMVGIVTNWDDMEKIWHHTFYNELR	5	1	1	B4DW52	Q2(Deamidated); N11(Deamidated)	3457.64	0	0.0001133				High	4.32392	0				High	4.54071	0	1
	HQGVMVGIVTNWDDMEKIWHHTFYNELR	7	1	1	B4DW52	N11(Deamidated); M15(Oxidation); N25(Deamidated)	3473.64	0	0.001765				High	4.10806	0				High	4.29357	0	1
	HQGVMVGIVTNWDDMEKIWHHTFYNELR	2	1	1	B4DW52	M5(Oxidation); N11(Deamidated); M15(Oxidation); N25(Deamidated)	3489.63	0	0.006711				High	4.06179	0							1
	MQKEITALAPSTMKIK	2	33	3	P68133;B4DUI8;B4DW52	M13(Oxidation)	1805.98	0	0.01723				High	3.39445	0				High	3.28238	0	2
	LDLAGRDLTDYLMKILTER	1	31	6	Q562R1;P68133;B4DUI8;B4DW52;V9HVZ7;Q53G99		2236.2	0	0.003754				High	3.20336	0							2
	MQKEITALAPSTMKIK	2	33	3	P68133;B4DUI8;B4DW52		1789.99	0	0.01809				High	2.98113	0				High	3.1758	0	2
	CDVDIRKDLYANTVLSGGTTMYPGIADR	4	20	3	B4DW52;V9HVZ7;Q53G99	C1(Carbamidomethyl); M21(Oxidation)	3117.5	0	0.0009736							High	4.49688	0	High	6.00461	0	2
	VAPEEHPVLLTEAPLNPKANR	1	27	5	B4DW52;Q53G99;E7EVS6;Q562Z4;Q562L9	N20(Deamidated)	2296.23	0	0.0006282							High	3.22906	0				1
	VAPEEHPVLLTEAPLNPKANREK	3	24	5	B4DW52;Q53G99;E7EVS6;Q562L9;Q562Z4		2552.38	0	0.0008506							High	1.97313	0	High	4.89195	0	2
	MTQIMFETFNTPAMYVAIQAVLSLYASGR	2	28	5	B4DW52;Q53G99;E7EVS6;Q562M3;Q562L9	Q3(Deamidated)	3254.62	0	0.0001647										High	5.59637	0	0
	FRCPEALFQPSFLGMESCGIHETTFNSIMK	1	19	3	B4DW52;V9HVZ7;Q53G99	C3(Carbamidomethyl); Q9(Deamidated); C18(Carbamidomethyl)	3535.64	0	0.004304										High	5.34255	0	1
	CDVDIRKDLYANTVLSGGTTMYPGIADR	1	20	3	B4DW52;V9HVZ7;Q53G99	C1(Carbamidomethyl); N12(Deamidated)	3102.51	0	0.00195										High	4.33604	0	2
	QEYDESGPSIVHRK	1	22	6	Q9BYX7;P0CG38;B4DW52;V9HVZ7;Q53G99;L0R5C4	Q1(Deamidated)	1645.78	0	0.002478										High	2.6851	0	1
	CDVDIRKDLYANTVLSGGTTMYPGIADR	2	20	3	B4DW52;V9HVZ7;Q53G99	C1(Carbamidomethyl); N12(Deamidated); M21(Oxidation)	3118.49	0.001	0.005384	High	3.50763	0				High	2.8859	0				2
	CPEALFQPSFLGMESCGIHETTFNSIMK	6	19	3	B4DW52;V9HVZ7;Q53G99	C1(Carbamidomethyl); M13(Oxidation); C16(Carbamidomethyl); N24(Deamidated)	3248.46	0.001	0.01361	High	2.96117	0	High	4.49554	0	High	2.03459	0				0
	HQGVMVGIVTNWDDMEKIWHHTFYNELR	1	1	1	B4DW52	M5(Oxidation); M15(Oxidation)	3487.66	0.001	0.02865				High	2.53647	0							1
	IKIIAPPERK	4	34	6	Q562R1;P68133;B4DUI8;B4DW52;V9HVZ7;Q53G99		1164.75	0.001	0.03352				High	2.43487	0	High	1.88886	0	High	2.73133	0	2
	EKLCYVALDFEQEMATAASSSSLEK	1	20	3	B4DW52;V9HVZ7;Q53G99	C4(Carbamidomethyl); Q12(Deamidated)	2808.3	0.001	0.002169							High	2.48479	0				1
	EITALAPSTMKIKIIAPPER	1	32	4	P68133;B4DUI8;B4DW52;Q53G99		2179.25	0.001	0.009118										High	3.42633	0	2
	DLTDYLMK	8	31	6	Q562R1;P68133;B4DUI8;B4DW52;V9HVZ7;Q53G99	M7(Oxidation)	1014.48	0.002	0.03301				High	2.49493	0	High	2.26647	0	High	1.91396	0	0
	HQGVMVGIVTNWDDMEK	1	1	1	B4DW52	M5(Oxidation); M15(Oxidation)	1990.92	0.002	0.03405										High	3.56859	0	0
	EKLCYVALDFEQEMATAASSSSLEK	2	20	3	B4DW52;V9HVZ7;Q53G99	C4(Carbamidomethyl); Q12(Deamidated); M14(Oxidation)	2824.29	0.004	0.02432	High	3.43772	0				High	2.09698	0				1
	DLTDYLMK	8	31	6	Q562R1;P68133;B4DUI8;B4DW52;V9HVZ7;Q53G99		998.486	0.004	0.05801				High	2.39491	0	High	1.85033	0	High	1.54934	0	0
	IKIIAPPER	3	35	6	Q562R1;P68133;B4DUI8;B4DW52;V9HVZ7;Q53G99		1036.65	0.004	0.08078				High	2.37811	0	High	2.09943	0	High	2.85645	0	1
	EIVRDIKEK	1	35	6	P68133;P0CG38;B4DUI8;B4DW52;V9HVZ7;Q53G99		1129.66	0.004	0.05584							High	1.83167	0				2
	EKMTQIMFETFNTPAMYVAIQAVLSLYASGR	1	28	6	B4DW52;Q53G99;E7EVS6;Q562M3;Q562Z4;Q562L9	M3(Oxidation); M7(Oxidation); N12(Deamidated); M16(Oxidation)	3559.73	0.007	0.1668				High	3.11594	0							1
	CDVDIRK	1	21	4	Q562R1;B4DW52;V9HVZ7;Q53G99	C1(Carbamidomethyl)	905.451	0.009	0.1325							High	1.75704	0				1
P35580	Myosin-10 OS=Homo sapiens GN=MYH10 PE=1 SV=3 - [MYH10_HUMAN]	866.714	59.67	140	343	2117.05	61.39	134	631	1050.83	61.54	145	442	1893.88	63.36	168	568	1976	228.858	5.5415
	Sequence	# PSMs	# Proteins	# Protein Groups	Protein Group Accessions	Modifications	MH+ [Da]	q-Value	PEP	A2	XCorr A2	Probability A2	B2	XCorr B2	Probability B2	C2	XCorr C2	Probability C2	D2	XCorr D2	Probability D2	# Missed Cleavages
	IVGLDQVTGMTETAFGSAYK	24	5	2	P35580;P35580-2	M10(Oxidation)	2104.03	0	4.652e-09	High	4.9654	0	High	5.6029	0	High	3.36923	0	High	5.79593	0	0
	MQAHIQDLEEQLDEEEGAR	13	5	2	P35580;P35580-2		2241.01	0	3.625e-08	High	4.96311	0	High	5.84232	0	High	4.35512	0	High	7.37717	0	0
	MQAHIQDLEEQLDEEEGAR	12	5	2	P35580;P35580-2	M1(Oxidation)	2257	0	4.988e-06	High	4.92781	0	High	5.73413	0	High	4.74833	0	High	5.69176	0	0
	LQQELDDLTVDLDHQR	18	5	2	P35580;P35580-2	Q15(Deamidated)	1938.94	0	1.317e-06	High	4.71905	0	High	4.91744	0	High	3.80562	0	High	5.16746	0	0
	DAASLESQLQDTQELLQEETR	24	5	2	P35580;P35580-2		2404.15	0	1.9e-08	High	4.62918	0	High	6.19282	0	High	4.88093	0	High	6.49961	0	0
	LQNELDNVSTLLEEAEKK	14	5	2	P35580;P35580-2		2073.07	0	7.222e-07	High	4.58575	0	High	6.28113	0	High	3.61766	0	High	5.5282	0	1
	LQRELDDATEANEGLSR	4	5	2	P35580;P35580-2		1916.93	0	9.723e-05	High	4.47003	0	High	4.94796	0	High	3.5999	0	High	4.59291	0	1
	DAASLESQLQDTQELLQEETR	56	5	2	P35580;P35580-2	Q13(Deamidated)	2405.13	0	1.417e-07	High	4.3294	0	High	6.62502	0	High	4.59652	0	High	6.76893	0	0
	KTTLQVDTLNAELAAER	11	5	2	P35580;P35580-2		1873	0	4.56e-08	High	4.31466	0	High	4.91504	0	High	4.18968	0	High	5.05506	0	1
	NILAEQLQAETELFAEAEEMR	7	5	2	P35580;P35580-2	M20(Oxidation)	2451.17	0	1.12e-05	High	4.20949	0	High	6.08546	0	High	3.93101	0	High	5.90299	0	0
	HAEQERDELADEITNSASGK	17	5	2	P35580;P35580-2		2200.01	0	5.543e-06	High	4.17414	0	High	5.09863	0	High	3.97713	0	High	5.03346	0	1
	NTDQASMPENTVAQK	32	5	2	P35580;P35580-2	M7(Oxidation)	1649.75	0	2.801e-05	High	4.09465	0	High	4.70612	0	High	3.43612	0	High	4.17145	0	0
	NMDPLNDNVATLLHQSSDR	7	5	2	P35580;P35580-2		2140.01	0	5.401e-06	High	4.06141	0	High	5.02457	0	High	3.24139	0	High	4.81619	0	0
	LQQELDDLTVDLDHQR	24	5	2	P35580;P35580-2		1937.96	0	3.602e-07	High	4.02597	0	High	5.48457	0	High	3.84487	0	High	5.55483	0	0
	TQLEELEDELQATEDAK	17	16	3	P35580;P35580-2;P35579		1961.92	0	8.695e-07	High	3.9975	0	High	5.55788	0	High	3.63559	0	High	4.61434	0	0
	IAQLEEELEEEQSNMELLNDR	24	5	2	P35580;P35580-2	M15(Oxidation)	2548.17	0	3.094e-07	High	3.99031	0	High	5.40661	0	High	4.19511	0	High	5.53802	0	0
	TQLEELEDELQATEDAKLR	7	16	3	P35580;P35580-2;P35579		2231.11	0	3.539e-05	High	3.9781	0	High	3.83721	0	High	3.57858	0	High	5.21872	0	1
	HAEQERDELADEITNSASGK	14	5	2	P35580;P35580-2	Q4(Deamidated)	2201	0	0.0003555	High	3.96794	0	High	5.19955	0	High	3.86888	0	High	4.42768	0	1
	IGQLEEQLEQEAKER	6	5	2	P35580;P35580-2	Q10(Deamidated)	1800.9	0	2.105e-05	High	3.96383	0				High	2.78188	0	High	4.05517	0	1
	IGQLEEQLEQEAKER	9	5	2	P35580;P35580-2		1799.91	0	5.544e-06	High	3.94935	0	High	4.10103	0	High	3.50853	0	High	4.84701	0	1
	QLEEEKNSLQEQQEEEEEARK	7	5	2	P35580;P35580-2		2603.21	0	0.0005688	High	3.94417	0	High	5.24568	0	High	4.07085	0	High	4.24351	0	2
	MQAHIQDLEEQLDEEEGARQK	6	5	2	P35580;P35580-2		2497.16	0	1.078e-07	High	3.94151	0				High	4.09855	0	High	7.09408	0	1
	QLHLEGASLELSDDDTESK	4	5	2	P35580;P35580-2		2086.98	0	0.0006746	High	3.90347	0	High	4.90777	0	High	2.69925	0	High	4.31317	0	0
	ELQAQIAELQEDFESEK	19	5	2	P35580;P35580-2		2006.96	0	2.586e-05	High	3.87596	0	High	4.79238	0	High	3.3437	0	High	4.53006	0	0
	TTLQVDTLNAELAAER	13	5	2	P35580;P35580-2		1744.91	0	1.179e-08	High	3.87497	0	High	4.76076	0	High	3.50998	0	High	5.00855	0	0
	NKQEVMISDLEER	24	5	2	P35580;P35580-2	M6(Oxidation)	1606.78	0	5.443e-05	High	3.83068	0	High	4.4908	0	High	3.61167	0	High	4.37728	0	1
	ADMEDLMSSKDDVGK	3	5	2	P35580;P35580-2		1640.71	0	0.0002625	High	3.79458	0	High	4.15173	0				High	3.70622	0	1
	FAKDAASLESQLQDTQELLQEETR	4	5	2	P35580;P35580-2		2750.35	0	3.048e-06	High	3.7548	0				High	3.46484	0	High	5.36066	0	1
	QLLQANPILESFGNAK	28	5	2	P35580;P35580-2		1742.94	0	6.596e-05	High	3.75195	0	High	5.05333	0	High	3.93956	0	High	4.80584	0	0
	NKQGLETDNKELACEVK	8	5	2	P35580;P35580-2	C14(Carbamidomethyl)	1975.98	0	4.038e-06	High	3.73422	0	High	4.31696	0	High	3.85901	0	High	4.77891	0	2
	NMDPLNDNVATLLHQSSDR	9	5	2	P35580;P35580-2	M2(Oxidation)	2156	0	2.312e-05	High	3.69323	0	High	5.22834	0	High	2.40713	0	High	4.76586	0	0
	AQTKEQADFAVEALAK	7	10	2	P35580;P35580-2		1719.9	0	1.771e-06	High	3.67673	0	High	5.27122	0	High	3.84729	0	High	4.36202	0	1
	ADFCIIHYAGK	5	9	3	P35580;P35580-2;P35579	C4(Carbamidomethyl)	1294.62	0	9.784e-05	High	3.64329	0	High	4.00785	0	High	2.7032	0	High	4.20821	0	0
	IAQLEEELEEEQSNMELLNDR	18	5	2	P35580;P35580-2		2532.18	0	3.604e-09	High	3.6368	0	High	6.42784	0	High	3.41974	0	High	5.83244	0	0
	ALEEETKNHEAQIQDMR	11	5	2	P35580;P35580-2		2041.96	0	1.786e-06	High	3.63633	0	High	4.36658	0	High	2.31652	0	High	4.57166	0	1
	HGFEAASIKEER	6	8	2	P35580;P35580-2		1373.68	0	5.702e-06	High	3.63383	0	High	3.90078	0	High	3.40766	0	High	4.25573	0	1
	LQNELDNVSTLLEEAEKK	19	5	2	P35580;P35580-2	N7(Deamidated)	2074.05	0	9.699e-08	High	3.60056	0	High	4.93258	0	High	3.46201	0	High	5.06027	0	1
	IAQLEEELEEEQSNMELLNDR	10	5	2	P35580;P35580-2	Q12(Deamidated); M15(Oxidation)	2549.18	0	0.001669	High	3.57749	0	High	5.23873	0	High	4.26077	0	High	4.0225	0	0
	QVLALQSQLADTKK	8	5	2	P35580;P35580-2		1542.89	0	0.0001608	High	3.56332	0	High	4.60317	0	High	3.84362	0	High	5.14442	0	1
	VEDMAELTCLNEASVLHNLK	2	12	3	P35580;P35580-2;P35579	M4(Oxidation); C9(Carbamidomethyl)	2302.11	0	1.057e-05	High	3.56071	0	High	5.24634	0							0
	KVDDDLGTIESLEEAK	6	5	2	P35580;P35580-2		1761.87	0	9.663e-05	High	3.54626	0	High	3.91051	0	High	2.73945	0	High	4.69949	0	1
	LLKDAEALSQR	10	5	2	P35580;P35580-2		1243.7	0	0.0003013	High	3.51446	0	High	3.62934	0	High	3.88061	0	High	3.71858	0	1
	IAECSSQLAEEEEKAK	9	5	2	P35580;P35580-2	C4(Carbamidomethyl)	1821.86	0	1.16e-05	High	3.49503	0	High	5.28134	0	High	3.36524	0	High	4.6248	0	1
	NKQEVMISDLEER	11	5	2	P35580;P35580-2		1590.78	0	0.0003502	High	3.48577	0	High	4.2782	0	High	3.80866	0	High	4.26103	0	1
	DVDRIVGLDQVTGMTETAFGSAYK	2	3	2	P35580;P35580-2	M14(Oxidation)	2589.25	0	1.292e-05	High	3.48544	0				High	4.12798	0				1
	KKLDAQVQELHAK	3	5	2	P35580;P35580-2		1507.86	0	7.095e-05	High	3.4792	0				High	3.40634	0	High	3.52694	0	2
	KTTLQVDTLNAELAAER	10	5	2	P35580;P35580-2	N10(Deamidated)	1873.98	0	4.72e-05	High	3.475	0	High	4.4936	0	High	3.69659	0	High	4.5554	0	1
	IVGLDQVTGMTETAFGSAYK	17	5	2	P35580;P35580-2		2088.03	0	6.674e-07	High	3.47078	0	High	6.061	0	High	3.24856	0	High	5.6712	0	0
	ALEEALEAKEEFER	19	5	2	P35580;P35580-2		1663.82	0	2.164e-07	High	3.45621	0	High	4.21075	0	High	3.64561	0	High	4.65897	0	1
	QLLQANPILESFGNAK	48	5	2	P35580;P35580-2	N14(Deamidated)	1743.93	0	6.537e-05	High	3.44258	0	High	5.25267	0	High	3.74836	0	High	5.36549	0	0
	IGQLEEQLEQEAK	10	5	2	P35580;P35580-2	Q7(Deamidated)	1515.75	0	6.417e-05	High	3.40321	0	High	3.91557	0	High	2.96652	0	High	4.23998	0	0
	IGQLEEQLEQEAK	10	5	2	P35580;P35580-2		1514.77	0	2.488e-05	High	3.37278	0	High	4.83647	0	High	3.10542	0	High	4.23682	0	0
	LQNELDNVSTLLEEAEK	13	5	2	P35580;P35580-2		1944.98	0	7.186e-06	High	3.35728	0	High	4.23621	0	High	2.71108	0	High	4.52339	0	0
	QLEEEKNSLQEQQEEEEEAR	5	5	2	P35580;P35580-2		2475.11	0	2.741e-05	High	3.32663	0	High	6.30193	0	High	4.35658	0	High	4.66282	0	1
	VEEEEERNQILQNEKK	6	5	2	P35580;P35580-2		2015	0	0.005772	High	3.31759	0	High	3.72331	0	High	3.19622	0	High	3.09501	0	2
	KKVDDDLGTIESLEEAK	12	5	2	P35580;P35580-2		1889.97	0	0.0001408	High	3.31687	0	High	5.2267	0	High	3.56147	0	High	5.05081	0	2
	TTLQVDTLNAELAAER	17	5	2	P35580;P35580-2	Q4(Deamidated)	1745.89	0	5.968e-07	High	3.30276	0	High	5.03044	0	High	3.6485	0	High	4.85192	0	0
	QGLETDNKELACEVK	3	5	2	P35580;P35580-2	C12(Carbamidomethyl)	1733.84	0	0.0009065	High	3.30166	0				High	2.6324	0	High	2.82073	0	1
	MQAHIQDLEEQLDEEEGARQK	4	5	2	P35580;P35580-2	M1(Oxidation)	2513.16	0	2.075e-08	High	3.2833	0				High	4.66258	0	High	5.58373	0	1
	EDQSILCTGESGAGKTENTKK	7	21	4	P35580;P35580-2;Q7Z406-6;P35579	C7(Carbamidomethyl)	2253.07	0	0.000234	High	3.28166	0	High	4.85033	0	High	3.03129	0	High	4.52046	0	2
	IVGLDQVTGMTETAFGSAYK	5	5	2	P35580;P35580-2	Q6(Deamidated); M10(Oxidation)	2105.01	0	1.019e-06	High	3.27838	0	High	3.66616	0	High	4.18301	0	High	3.78727	0	0
	KEEELQGALAR	2	5	2	P35580;P35580-2	Q6(Deamidated)	1244.65	0	0.0007535	High	3.2739	0				High	2.52902	0				1
	MEEEILLLEDQNSK	19	5	2	P35580;P35580-2	M1(Oxidation)	1706.82	0	2.102e-06	High	3.27001	0	High	4.40034	0	High	2.86007	0	High	4.61145	0	0
	KLDAQVQELHAK	7	5	2	P35580;P35580-2		1379.76	0	0.0005209	High	3.26476	0	High	3.62858	0	High	3.16372	0	High	4.40518	0	1
	ALEEALEAKEEFERQNK	3	5	2	P35580;P35580-2		2034.01	0	0.0001657	High	3.26095	0							High	4.12907	0	2
	QEEELQAKDEELLK	9	5	2	P35580;P35580-2		1701.86	0	3.695e-06	High	3.24349	0	High	4.93137	0	High	3.18067	0	High	5.51847	0	1
	NTDQASMPENTVAQK	8	5	2	P35580;P35580-2		1633.75	0	1.567e-06	High	3.23392	0	High	4.00214	0	High	3.77265	0	High	5.11805	0	0
	IAQLEEELEEEQSNMELLNDR	2	5	2	P35580;P35580-2	Q12(Deamidated); N14(Deamidated); M15(Oxidation)	2550.16	0	0.001581	High	3.18117	0										0
	ELDDATEANEGLSR	19	5	2	P35580;P35580-2		1519.69	0	0.0001298	High	3.17115	0	High	4.18209	0	High	3.28695	0	High	4.11881	0	0
	MEIDLKDLEAQIEAANK	3	5	2	P35580;P35580-2	M1(Oxidation)	1946.98	0	2.707e-05	High	3.17006	0				High	3.09608	0	High	4.71631	0	1
	IVGLDQVTGMTETAFGSAYK	5	5	2	P35580;P35580-2	Q6(Deamidated)	2089.02	0	0.0003923	High	3.12383	0	High	4.45454	0	High	3.64317	0	High	4.2764	0	0
	DAEALSQRLEEK	6	5	2	P35580;P35580-2		1388.7	0	0.01003	High	3.10277	0	High	3.18236	0	High	2.28576	0	High	2.45849	0	1
	IAQLEEELEEEQSNMELLNDR	16	5	2	P35580;P35580-2	Q3(Deamidated)	2533.17	0	0.0001013	High	3.09447	0	High	5.38428	0	High	4.28671	0	High	5.995	0	0
	NLPIYSENIIEMYR	8	7	2	P35580;P35580-2		1754.88	0	0.0005096	High	3.09138	0	High	4.03103	0	High	2.47312	0	High	3.92572	0	0
	TVGQLYKESLTK	13	5	2	P35580;P35580-2		1366.76	0	0.007203	High	3.08541	0	High	3.43258	0	High	2.72344	0	High	3.4301	0	1
	KMEEEILLLEDQNSK	5	5	2	P35580;P35580-2	M2(Oxidation)	1834.91	0	0.0002109	High	3.08373	0				High	3.28706	0	High	3.58952	0	1
	DAASLESQLQDTQELLQEETRQK	12	5	2	P35580;P35580-2	Q17(Deamidated)	2661.31	0	3.951e-05	High	3.07313	0	High	6.23845	0	High	3.767	0	High	5.15223	0	1
	MQAHIQDLEEQLDEEEGAR	5	5	2	P35580;P35580-2	Q6(Deamidated)	2241.99	0	1.199e-06	High	3.06372	0	High	4.38409	0				High	5.36772	0	0
	QVLALQSQLADTK	15	5	2	P35580;P35580-2	Q8(Deamidated)	1415.77	0	0.0003217	High	3.05327	0	High	4.16255	0	High	2.96216	0	High	3.67342	0	0
	ALEEETKNHEAQIQDMR	16	5	2	P35580;P35580-2	M16(Oxidation)	2057.95	0	0.004484	High	3.05163	0	High	4.26085	0	High	2.81097	0	High	4.09802	0	1
	AGKLDPHLVLDQLR	5	9	3	P35580;P35580-2;P35579		1574.9	0	1.295e-05	High	3.04921	0				High	2.99613	0	High	3.25842	0	1
	VDDDLGTIESLEEAKK	6	5	2	P35580;P35580-2		1761.88	0	7.222e-05	High	3.04798	0	High	4.18313	0	High	2.03015	0	High	3.46367	0	1
	VVSSVLQFGNISFKK	6	5	2	P35580;P35580-2	N10(Deamidated)	1653.92	0	0.001116	High	3.03804	0				High	3.75438	0	High	3.14096	0	1
	VDDDLGTIESLEEAK	4	5	2	P35580;P35580-2		1633.78	0	5.676e-05	High	3.03798	0	High	5.01953	0							0
	QVLALQSQLADTK	8	5	2	P35580;P35580-2		1414.79	0	4.444e-05	High	3.02864	0	High	3.98834	0	High	2.92176	0	High	4.17267	0	0
	IAECSSQLAEEEEKAK	6	5	2	P35580;P35580-2	C4(Carbamidomethyl); Q7(Deamidated)	1822.84	0	0.0003138	High	3.00449	0	High	4.61565	0				High	4.05716	0	1
	ADMEDLMSSKDDVGKNVHELEK	7	5	2	P35580;P35580-2	M3(Oxidation)	2506.15	0	2.489e-05	High	2.98728	0	High	3.2585	0	High	2.51915	0	High	4.66049	0	2
	VIQYLAHVASSHK	3	6	2	P35580;P35580-2	Q3(Deamidated)	1453.78	0	0.001076	High	2.96978	0				High	2.59565	0	High	2.85088	0	0
	AKLQELEGAVK	3	5	2	P35580;P35580-2	Q4(Deamidated)	1186.67	0	0.0009812	High	2.95443	0	High	2.60626	0				High	2.8582	0	1
	IKKMEEEILLLEDQNSK	4	5	2	P35580;P35580-2	M4(Oxidation)	2076.09	0	0.004642	High	2.94953	0				High	3.1035	0	High	4.05828	0	2
	KMQAHIQDLEEQLDEEEGAR	4	5	2	P35580;P35580-2	M2(Oxidation)	2385.1	0	6.612e-05	High	2.9459	0				High	3.21378	0	High	3.17112	0	1
	AVIYNPATQADWTAKK	8	8	2	P35580;P35580-2		1776.93	0	2.731e-05	High	2.94201	0	High	3.74704	0	High	2.92083	0	High	4.21367	0	1
	KFDQLLAEEK	11	21	4	P35580;P35580-2;Q7Z406-6;P35579		1220.65	0	0.003255	High	2.93671	0	High	3.79673	0	High	2.97414	0	High	3.25074	0	1
	HEMPPHIYAISESAYR	4	7	2	P35580;P35580-2	M3(Oxidation)	1916.89	0	0.0002304	High	2.93322	0				High	2.54123	0	High	3.3472	0	0
	ELEAELEDERK	8	5	2	P35580;P35580-2		1360.66	0	0.008405	High	2.93037	0	High	3.41422	0	High	2.53071	0	High	2.91077	0	1
	DELADEITNSASGK	2	5	2	P35580;P35580-2		1449.67	0	0.0003964	High	2.90688	0	High	3.57618	0							0
	ELQAQIAELQEDFESEK	22	5	2	P35580;P35580-2	Q5(Deamidated)	2007.94	0	0.003558	High	2.89938	0				High	3.55593	0	High	4.3068	0	0
	DVDRIVGLDQVTGMTETAFGSAYK	6	3	2	P35580;P35580-2		2573.26	0	5.155e-07	High	2.88602	0	High	5.77386	0	High	3.6051	0	High	6.91985	0	1
	VIQYLAHVASSHK	13	6	2	P35580;P35580-2		1452.8	0	2.886e-05	High	2.88581	0	High	3.93495	0	High	2.88311	0	High	4.10712	0	0
	VEEEEERNQILQNEK	8	5	2	P35580;P35580-2		1886.91	0	1.85e-05	High	2.88459	0	High	4.02134	0	High	3.44508	0	High	4.50078	0	1
	ELDDATEANEGLSR	8	5	2	P35580;P35580-2	N9(Deamidated)	1520.68	0	2.51e-05	High	2.8796	0	High	4.56445	0	High	2.81888	0	High	4.20376	0	0
	QLEEAEEEATR	10	5	2	P35580;P35580-2		1304.6	0	0.000772	High	2.87824	0	High	3.27647	0	High	2.52902	0	High	3.73461	0	0
	KLQAQMKDYQR	3	5	2	P35580;P35580-2		1408.73	0	0.0009081	High	2.86766	0				High	3.29749	0	High	3.02702	0	2
	ADMEDLMSSKDDVGKNVHELEK	4	5	2	P35580;P35580-2		2490.15	0	1.072e-05	High	2.86116	0				High	2.50029	0	High	4.79781	0	2
	LDPHLVLDQLR	12	9	3	P35580;P35580-2;P35579		1318.75	0	0.0005438	High	2.85384	0	High	2.47633	0	High	1.99354	0	High	3.09491	0	0
	QTKVEGELEEMER	6	5	2	P35580;P35580-2		1577.75	0	0.01629	High	2.82697	0	High	3.97811	0	High	3.0934	0	High	3.83865	0	1
	TELEDTLDTTAAQQELR	4	5	2	P35580;P35580-2		1933.94	0	8.654e-07	High	2.80081	0	High	4.74794	0				High	3.1802	0	0
	VVSSVLQFGNISFK	6	5	2	P35580;P35580-2		1524.84	0	5.112e-06	High	2.79641	0	High	3.60442	0	High	2.66362	0	High	4.78361	0	0
	SDLLLEGFNNYR	19	5	2	P35580;P35580-2		1440.71	0	0.0001063	High	2.79379	0	High	3.66985	0	High	2.6936	0	High	2.77809	0	0
	HATALEELSEQLEQAK	4	5	2	P35580;P35580-2		1796.9	0	7.685e-06	High	2.77385	0	High	3.04146	0	High	2.45572	0	High	5.38021	0	0
	QRYEILTPNAIPK	5	12	3	P35580;P35580-2;Q7Z406-6	N9(Deamidated)	1543.85	0	0.001158	High	2.74385	0	High	3.41286	0	High	2.79521	0	High	3.5362	0	1
	QEEELQAKDEELLKVK	5	5	2	P35580;P35580-2		1929.02	0	9.338e-05	High	2.73849	0	High	4.56137	0				High	5.71263	0	2
	CNGVLEGIR	4	30	5	P35580;P35580-2;Q7Z406-6;P35579;Q9Y623	C1(Carbamidomethyl)	1017.52	0	0.01253	High	2.72508	0	High	2.669	0	High	2.55738	0	High	2.67284	0	0
	ALEQQVEEMR	16	5	2	P35580;P35580-2	M9(Oxidation)	1248.59	0	0.001114	High	2.71111	0	High	3.10593	0	High	2.43339	0	High	3.33582	0	0
	VVSSVLQFGNISFKK	11	5	2	P35580;P35580-2		1652.94	0	0.0001245	High	2.7026	0	High	3.26486	0	High	2.97771	0	High	3.84085	0	1
	MEIDLKDLEAQIEAANK	5	5	2	P35580;P35580-2		1930.98	0	0.0008008	High	2.70203	0	High	4.74464	0	High	2.66084	0	High	4.62391	0	1
	MEEEILLLEDQNSK	11	5	2	P35580;P35580-2		1690.82	0	7.699e-06	High	2.70113	0	High	4.56662	0	High	3.22418	0	High	4.68468	0	0
	LLKDAEALSQRLEEK	2	5	2	P35580;P35580-2		1742.96	0	0.0006495	High	2.68101	0							High	4.05539	0	2
	ELQAQIAELQEDFESEKASR	5	5	2	P35580;P35580-2		2321.13	0	3.393e-07	High	2.67942	0				High	3.79762	0	High	5.1609	0	1
	ASRDEIFAQSK	7	5	2	P35580;P35580-2		1251.63	0	0.02126	High	2.67031	0	High	3.00351	0	High	2.83925	0	High	2.30925	0	1
	ALEEETKNHEAQIQDMR	11	5	2	P35580;P35580-2	Q12(Deamidated); M16(Oxidation)	2058.94	0	0.0004477	High	2.65782	0	High	3.69056	0	High	2.68981	0	High	4.17545	0	1
	AVIYNPATQADWTAK	11	8	2	P35580;P35580-2		1648.83	0	0.0001188	High	2.65182	0	High	4.49239	0	High	2.48013	0	High	4.65158	0	0
	FDQLLAEEK	8	21	4	P35580;P35580-2;Q7Z406-6;P35579		1092.56	0	0.002772	High	2.64834	0	High	3.03742	0	High	2.42027	0	High	2.87921	0	0
	DVDRIVGLDQVTGMTETAFGSAYK	1	3	2	P35580;P35580-2	Q10(Deamidated); M14(Oxidation)	2590.26	0	0.0008532	High	2.63636	0										1
	KDHNIPGELER	6	2	1	P35580		1307.67	0	0.00273	High	2.63553	0	High	2.6314	0	High	2.42625	0	High	3.2755	0	1
	HEMPPHIYAISESAYR	4	7	2	P35580;P35580-2		1900.9	0	0.0001852	High	2.62788	0				High	3.07793	0	High	3.45437	0	0
	TQLEELEDELQATEDAK	5	16	3	P35580;P35580-2;P35579	Q11(Deamidated)	1962.9	0	0.00051	High	2.62678	0	High	4.03398	0				High	4.29502	0	0
	ADMEDLMSSKDDVGKNVHELEK	7	5	2	P35580;P35580-2	M3(Oxidation); M7(Oxidation)	2522.13	0	0.0001625	High	2.62162	0	High	3.25898	0	High	3.20558	0	High	4.27958	0	2
	QVLALQSQLADTKK	5	5	2	P35580;P35580-2	Q6(Deamidated)	1543.87	0	0.00117	High	2.60352	0				High	3.12395	0	High	2.59324	0	1
	AKLQELEGAVK	4	5	2	P35580;P35580-2		1185.68	0	0.004124	High	2.59453	0	High	3.18301	0	High	3.09484	0	High	3.14136	0	1
	QEVMISDLEER	4	5	2	P35580;P35580-2		1348.64	0	0.001153	High	2.5789	0	High	3.27844	0	High	2.24218	0	High	3.14862	0	0
	VDYKADEWLMK	15	9	3	P35580;P35580-2;P35579	M10(Oxidation)	1413.67	0	0.0001581	High	2.57499	0	High	2.97044	0	High	2.3969	0	High	3.43743	0	1
	ERNTDQASMPENTVAQK	5	5	2	P35580;P35580-2	M9(Oxidation)	1934.89	0	0.004661	High	2.56238	0	High	2.76353	0	High	2.21496	0	High	2.96901	0	1
	VEGELEEMER	4	5	2	P35580;P35580-2		1220.55	0	0.007287	High	2.56193	0	High	3.01686	0	High	2.0683	0	High	2.8425	0	0
	QRYEILTPNAIPK	6	12	3	P35580;P35580-2;Q7Z406-6		1542.87	0	0.02272	High	2.55957	0	High	3.46288	0	High	2.28486	0	High	3.33602	0	1
	VEEEEERNQILQNEK	17	5	2	P35580;P35580-2	N13(Deamidated)	1887.89	0	0.006205	High	2.55435	0	High	4.15541	0	High	2.6342	0	High	2.4356	0	1
	FDQLLAEEK	4	21	4	P35580;P35580-2;Q7Z406-6;P35579	Q3(Deamidated)	1093.54	0	0.006426	High	2.55307	0	High	2.47359	0	High	2.32946	0	High	2.93505	0	0
	AGVLAHLEEER	8	9	3	P35580;P35580-2;P35579		1223.64	0	9.587e-05	High	2.53264	0	High	2.92101	0	High	2.4585	0	High	3.48623	0	0
	VDYKADEWLMK	12	9	3	P35580;P35580-2;P35579		1397.68	0	4.257e-05	High	2.51422	0	High	3.07793	0	High	2.17874	0	High	3.57755	0	1
	VEGELEEMER	17	5	2	P35580;P35580-2	M8(Oxidation)	1236.54	0	0.0008862	High	2.5113	0	High	2.87376	0	High	2.49194	0	High	2.887	0	0
	FVAELWKDVDR	4	3	2	P35580;P35580-2		1377.72	0	0.006274	High	2.49079	0	High	2.19431	0				High	3.00621	0	1
	KEEELQGALAR	8	5	2	P35580;P35580-2		1243.66	0	0.0005881	High	2.48484	0	High	3.5038	0	High	2.77412	0	High	3.74543	0	1
	GDDETLHKNNALK	2	5	2	P35580;P35580-2		1454.72	0	0.0009322	High	2.44568	0				High	1.98769	0				1
	NLPIYSENIIEMYR	3	7	2	P35580;P35580-2	M12(Oxidation)	1770.87	0	9.224e-05	High	2.4387	0	High	4.44791	0	High	2.45349	0				0
	QEEELQAKDEELLK	7	5	2	P35580;P35580-2	Q6(Deamidated)	1702.84	0	0.0001417	High	2.43674	0	High	4.12801	0	High	2.56525	0	High	4.32838	0	1
	EDQSILCTGESGAGK	4	22	4	P35580;P35580-2;Q7Z406-6;P35579	C7(Carbamidomethyl)	1551.69	0	1.272e-05	High	2.39735	0	High	3.96387	0	High	2.17606	0	High	4.35023	0	0
	AQTKEQADFAVEALAK	7	10	2	P35580;P35580-2	Q6(Deamidated)	1720.88	0	3.201e-05	High	2.38909	0	High	4.97883	0	High	2.67345	0	High	5.05068	0	1
	IAECSSQLAEEEEKAKNLAK	1	5	2	P35580;P35580-2	C4(Carbamidomethyl)	2248.11	0	0.001541	High	2.38187	0										2
	ALELDPNLYR	8	10	2	P35580;P35580-2		1203.64	0	0.000395	High	2.37205	0	High	3.25852	0	High	1.7419	0	High	3.33304	0	0
	ELEAELEDER	4	5	2	P35580;P35580-2		1232.56	0	0.001875	High	2.34354	0	High	2.83834	0	High	1.88616	0	High	2.79303	0	0
	TGLEDPERYLFVDR	3	8	2	P35580;P35580-2		1709.85	0	0.002007	High	2.33841	0				High	1.99881	0	High	2.26435	0	1
	KLQAQMKDYQR	2	5	2	P35580;P35580-2	M6(Oxidation)	1424.73	0	0.0001995	High	2.33158	0				High	3.01138	0				2
	FKATISALEAK	4	5	2	P35580;P35580-2		1178.68	0	0.0006823	High	2.2999	0	High	2.84129	0	High	2.74317	0	High	3.44892	0	1
	EDQSILCTGESGAGKTENTK	4	21	4	P35580;P35580-2;Q7Z406-6;P35579	C7(Carbamidomethyl)	2124.97	0	8.893e-06	High	2.22203	0	High	4.70129	0	High	2.02241	0	High	3.72079	0	1
	VEGELEEMERK	7	5	2	P35580;P35580-2		1348.64	0	0.00106	High	2.19412	0	High	3.72292	0	High	2.55384	0	High	3.7209	0	1
	DAASLESQLQDTQELLQEETRQK	4	5	2	P35580;P35580-2		2660.31	0	1.652e-07	High	2.18651	0	High	5.03517	0	High	2.52667	0	High	5.58013	0	1
	ALELDPNLYR	2	10	2	P35580;P35580-2	N7(Deamidated)	1204.62	0	0.001549	High	2.18192	0				High	2.09167	0				0
	SDLLLEGFNNYR	11	5	2	P35580;P35580-2	N9(Deamidated)	1441.7	0	9.206e-05	High	2.1556	0	High	3.38132	0	High	2.68869	0	High	3.08578	0	0
	ALEQQVEEMR	5	5	2	P35580;P35580-2		1232.59	0	0.00214	High	2.14093	0	High	3.46773	0	High	2.19464	0	High	3.07952	0	0
	ADMEDLMSSKDDVGK	7	5	2	P35580;P35580-2	M3(Oxidation)	1656.71	0	0.01464	High	2.09022	0	High	3.2009	0	High	2.5648	0	High	3.4561	0	1
	LDPHLVLDQLR	2	9	3	P35580;P35580-2;P35579	Q9(Deamidated)	1319.73	0	0.0004516	High	2.08741	0							High	2.42227	0	0
	NMDPLNDNVATLLHQSSDR	8	5	2	P35580;P35580-2	M2(Oxidation); N6(Deamidated)	2156.99	0	0.001321	High	2.08565	0	High	3.6228	0	High	2.42158	0				0
	EQADFAVEALAK	2	10	2	P35580;P35580-2	Q2(Deamidated)	1292.64	0	0.01396	High	2.05312	0	High	2.85146	0							0
	EIFMQVEDERR	5	5	2	P35580;P35580-2	M4(Oxidation)	1467.69	0	0.01477	High	2.04482	0	High	2.45598	0	High	1.89992	0	High	2.24972	0	1
	QTKVEGELEEMER	6	5	2	P35580;P35580-2	M11(Oxidation)	1593.74	0	0.0003298	High	2.03183	0	High	3.29723	0	High	3.36699	0	High	2.62389	0	1
	TGLEDPER	4	8	2	P35580;P35580-2		916.437	0	0.00201	High	1.98181	0	High	1.86803	0	High	2.05181	0	High	2.14242	0	0
	QLEEAEEEATRANASR	4	5	2	P35580;P35580-2		1803.85	0	0.0038	High	1.88454	0	High	3.32683	0	High	1.80844	0	High	2.36414	0	1
	EIFMQVEDERR	5	5	2	P35580;P35580-2		1451.69	0	0.002276	High	1.82077	0	High	2.11985	0	High	1.93089	0	High	3.25922	0	1
	YEILTPNAIPK	6	12	3	P35580;P35580-2;Q7Z406-6		1258.7	0	0.003073	High	1.80465	0	High	2.9408	0	High	2.05544	0	High	2.65055	0	0
	ELEAELEDERKQR	5	5	2	P35580;P35580-2		1644.82	0	0.003619	High	1.65475	0	High	2.30599	0	High	1.95561	0	High	1.96939	0	2
	DAASLESQLQDTQELLQEETRQK	6	5	2	P35580;P35580-2	Q13(Deamidated); Q17(Deamidated)	2662.28	0	0.003252				High	5.11064	0	High	3.20844	0				1
	NTDQASMPENTVAQK	12	5	2	P35580;P35580-2	Q14(Deamidated)	1634.73	0	3.77e-05				High	4.9694	0	High	2.77521	0	High	4.43605	0	0
	CMLQDREDQSILCTGESGAGK	2	6	2	P35580;P35580-2	C1(Carbamidomethyl); C13(Carbamidomethyl)	2355.03	0	3.424e-05				High	4.88661	0				High	4.43574	0	1
	DAASLESQLQDTQELLQEETR	5	5	2	P35580;P35580-2	Q8(Deamidated); Q10(Deamidated)	2406.14	0	0.000184				High	4.63808	0							0
	INFDVTGYIVGANIETYLLEK	1	10	2	P35580;P35580-2		2372.24	0	0.007613				High	4.4769	0							0
	INFDVTGYIVGANIETYLLEK	2	10	2	P35580;P35580-2	N13(Deamidated)	2373.24	0	0.01557				High	4.39382	0							0
	NSLQEQQEEEEEARK	4	5	2	P35580;P35580-2		1846.84	0	0.000839				High	4.30631	0	High	2.90393	0	High	3.63425	0	1
	VEDMAELTCLNEASVLHNLK	2	12	3	P35580;P35580-2;P35579	C9(Carbamidomethyl)	2286.11	0	2.569e-06				High	4.3016	0				High	5.31487	0	0
	GDEVMVELAENGKK	4	8	2	P35580;P35580-2	N11(Deamidated)	1519.73	0	7.943e-05				High	4.26321	0	High	3.00942	0	High	4.3258	0	1
	NMDPLNDNVATLLHQSSDR	3	5	2	P35580;P35580-2	Q15(Deamidated)	2141	0	6.698e-05				High	4.04977	0				High	3.50326	0	0
	AVIYNPATQADWTAK	3	8	2	P35580;P35580-2	Q9(Deamidated)	1649.82	0	0.002473				High	4.03388	0				High	3.43541	0	0
	EDQSILCTGESGAGKTENTKK	6	21	4	P35580;P35580-2;Q7Z406-6;P35579	C7(Carbamidomethyl); N18(Deamidated)	2254.05	0	0.008447				High	4.01336	0				High	3.29092	0	2
	TFHIFYQLLSGAGEHLK	4	5	2	P35580;P35580-2		1961.03	0	0.0007632				High	3.94149	0							0
	RQLEEAEEEATR	4	5	2	P35580;P35580-2		1460.7	0	9.449e-05				High	3.82022	0	High	2.6136	0	High	4.54742	0	1
	NKQGLETDNKELACEVK	8	5	2	P35580;P35580-2	Q3(Deamidated); C14(Carbamidomethyl)	1976.96	0	0.000629				High	3.78361	0	High	2.96939	0	High	3.66162	0	2
	GDEVMVELAENGKK	4	8	2	P35580;P35580-2		1518.75	0	0.001486				High	3.7629	0				High	3.17612	0	1
	NKQEVMISDLEER	3	5	2	P35580;P35580-2	Q3(Deamidated)	1591.76	0	0.00593				High	3.72605	0				High	3.29071	0	1
	AVIYNPATQADWTAKK	5	8	2	P35580;P35580-2	Q9(Deamidated)	1777.91	0	0.0004059				High	3.67141	0	High	2.21915	0	High	3.84913	0	1
	GDEVMVELAENGKK	5	8	2	P35580;P35580-2	M5(Oxidation)	1534.74	0	0.004662				High	3.5565	0	High	2.18752	0	High	3.20545	0	1
	TELEDTLDTTAAQQELR	8	5	2	P35580;P35580-2	Q14(Deamidated)	1934.92	0	0.0006679				High	3.49626	0				High	2.94916	0	0
	SLEAEILQLQEELASSER	4	5	2	P35580;P35580-2		2045.04	0	1.483e-06				High	3.46186	0	High	3.5825	0	High	4.47349	0	0
	GDEVMVELAENGKK	8	8	2	P35580;P35580-2	M5(Oxidation); N11(Deamidated)	1535.73	0	0.0006159				High	3.43304	0	High	2.7157	0	High	3.1954	0	1
	ERNTDQASMPENTVAQK	2	5	2	P35580;P35580-2		1918.89	0	0.00022				High	3.42752	0				High	4.07289	0	1
	LDAQVQELHAK	4	5	2	P35580;P35580-2		1251.67	0	0.001357				High	3.37174	0				High	3.08148	0	0
	IAQLEEELEEEQSNMELLNDRFR	1	5	2	P35580;P35580-2	N14(Deamidated)	2836.33	0	0.01322				High	3.35873	0							1
	EQADFAVEALAK	2	10	2	P35580;P35580-2		1291.65	0	0.01575				High	3.3422	0				High	2.61339	0	0
	FLSNGYIPIPGQQDK	3	5	2	P35580;P35580-2		1676.87	0	0.0007526				High	3.32519	0				High	2.99704	0	0
	LKEIFMQVEDERR	2	5	2	P35580;P35580-2		1692.87	0	0.004799				High	3.30044	0							2
	LQAQMKDYQR	2	5	2	P35580;P35580-2		1280.64	0	0.003457				High	3.29155	0				High	3.00722	0	1
	CNGVLEGIR	4	21	4	P35580;P35580-2;Q7Z406-6;P35579	C1(Carbamidomethyl); N2(Deamidated)	1018.5	0	0.001351				High	3.13211	0				High	2.85787	0	0
	QLEEAEEEATR	3	5	2	P35580;P35580-2	Q1(Deamidated)	1305.58	0	0.0002935				High	3.08396	0	High	2.31901	0	High	3.13188	0	0
	IRNKQEVMISDLEER	2	5	2	P35580;P35580-2		1859.96	0	0.005802				High	3.05247	0				High	3.74825	0	2
	NSLQEQQEEEEEARKNLEK	3	5	2	P35580;P35580-2		2331.1	0	0.00207				High	3.04161	0	High	2.19057	0	High	3.46468	0	2
	QEVMISDLEER	4	5	2	P35580;P35580-2	M4(Oxidation)	1364.64	0	0.001946				High	2.98282	0	High	2.88626	0	High	2.86245	0	0
	HADQYKEQMEK	2	5	2	P35580;P35580-2	M9(Oxidation)	1422.63	0	0.001783				High	2.97965	0				High	3.9208	0	1
	NHEAQIQDMR	6	5	2	P35580;P35580-2		1241.57	0	0.003043				High	2.92082	0	High	2.02277	0	High	2.87856	0	0
	DAEALSQRLEEK	4	5	2	P35580;P35580-2	Q7(Deamidated)	1389.69	0	0.001677				High	2.89858	0	High	2.31413	0	High	3.81153	0	1
	ALEQQVEEMR	4	5	2	P35580;P35580-2	Q4(Deamidated)	1233.58	0	0.002566				High	2.8739	0				High	2.89332	0	0
	ADMEDLMSSKDDVGK	3	5	2	P35580;P35580-2	M3(Oxidation); M7(Oxidation)	1672.7	0	0.006004				High	2.87261	0	High	2.15843	0	High	2.98791	0	1
	LKEIFMQVEDER	2	5	2	P35580;P35580-2		1536.77	0	0.001926				High	2.81247	0				High	2.92563	0	1
	VEGELEEMERK	4	5	2	P35580;P35580-2	M8(Oxidation)	1364.64	0	0.004647				High	2.71432	0				High	3.39855	0	1
	TVGQLYKESLTK	4	5	2	P35580;P35580-2	Q4(Deamidated)	1367.74	0	0.01508				High	2.65566	0				High	2.25889	0	1
	QLEEAEEEATRANASR	5	5	2	P35580;P35580-2	N13(Deamidated)	1804.83	0	0.00107				High	2.64594	0	High	2.09636	0	High	3.562	0	1
	DYQRELEEAR	3	5	2	P35580;P35580-2		1308.62	0	0.02159				High	2.51619	0				High	2.68796	0	1
	ERNTDQASMPENTVAQK	1	5	2	P35580;P35580-2	N3(Deamidated)	1919.88	0	0.009402				High	2.44889	0							1
	LLKDAEALSQR	2	5	2	P35580;P35580-2	Q10(Deamidated)	1244.68	0	0.000336				High	2.15509	0				High	3.62253	0	1
	NILAEQLQAETELFAEAEEMR	3	5	2	P35580;P35580-2		2435.17	0	7.523e-07							High	4.19781	0	High	6.26352	0	0
	QLEEEKNSLQEQQEEEEEAR	7	5	2	P35580;P35580-2	N7(Deamidated)	2476.11	0	7.89e-05							High	3.93296	0	High	4.11309	0	1
	NTDQASMPENTVAQK	1	5	2	P35580;P35580-2	Q4(Deamidated); M7(Oxidation)	1650.73	0	4.546e-05							High	3.49801	0				0
	IAECSSQLAEEEEK	2	5	2	P35580;P35580-2	C4(Carbamidomethyl)	1622.72	0	1.203e-05							High	3.3102	0	High	3.70878	0	0
	ALEEETKNHEAQIQDMR	10	5	2	P35580;P35580-2	Q14(Deamidated)	2042.94	0	0.0008204							High	3.22776	0	High	4.21084	0	1
	ALEQQVEEMRTQLEELEDELQATEDAK	3	5	2	P35580;P35580-2	M9(Oxidation)	3191.5	0	2.576e-05							High	2.90659	0	High	5.39596	0	1
	QKKFDQLLAEEK	4	7	3	P35580;P35580-2;P35579		1476.81	0	0.005605							High	2.73356	0	High	3.71835	0	2
	HADQYKEQMEKANAR	2	5	2	P35580;P35580-2	Q8(Deamidated)	1819.84	0	0.001336							High	2.70327	0				2
	IAQLEEELEEEQSNMELLNDRFR	3	5	2	P35580;P35580-2	M15(Oxidation)	2851.34	0	0.0003781							High	2.6802	0	High	4.2066	0	1
	NMDPLNDNVATLLHQSSDR	1	5	2	P35580;P35580-2	M2(Oxidation); N6(Deamidated); N8(Deamidated)	2157.99	0	0.0004506							High	2.42166	0				0
	NSLQEQQEEEEEAR	2	5	2	P35580;P35580-2		1718.75	0	7.986e-05							High	2.26145	0	High	3.54619	0	0
	MQAHIQDLEEQLDEEEGAR	1	5	2	P35580;P35580-2	M1(Oxidation); Q11(Deamidated)	2258	0	3.551e-05										High	6.1822	0	0
	DVDRIVGLDQVTGMTETAFGSAYK	1	3	2	P35580;P35580-2	Q10(Deamidated)	2574.24	0	2.527e-06										High	6.10327	0	1
	FAKDAASLESQLQDTQELLQEETR	3	5	2	P35580;P35580-2	Q11(Deamidated)	2751.33	0	6.87e-06										High	5.80281	0	1
	ALEQQVEEMRTQLEELEDELQATEDAK	1	5	2	P35580;P35580-2	M9(Oxidation); Q21(Deamidated)	3192.5	0	0.0008203										High	4.80953	0	1
	MEEEILLLEDQNSK	2	5	2	P35580;P35580-2	N12(Deamidated)	1691.81	0	0.0001077										High	4.14623	0	0
	DKADFCIIHYAGK	1	9	3	P35580;P35580-2;P35579	C6(Carbamidomethyl)	1537.75	0	0.000109										High	4.12224	0	1
	KALEEETKNHEAQIQDMR	1	5	2	P35580;P35580-2		2170.06	0	0.002587										High	4.07393	0	2
	IRQLEEEKNSLQEQQEEEEEAR	1	5	2	P35580;P35580-2		2744.3	0	0.0003179										High	3.88499	0	2
	KVDDDLGTIESLEEAKK	1	5	2	P35580;P35580-2		1889.97	0	0.001464										High	3.8606	0	2
	RALEQQVEEMR	1	5	2	P35580;P35580-2		1388.69	0	0.000367										High	3.74738	0	1
	HATALEELSEQLEQAKR	1	5	2	P35580;P35580-2		1953	0	8.023e-05										High	3.64894	0	1
	CMLQDREDQSILCTGESGAGKTENTK	1	5	2	P35580;P35580-2	C1(Carbamidomethyl); M2(Oxidation); C13(Carbamidomethyl)	2944.31	0	0.001888										High	3.5826	0	2
	QLRADMEDLMSSK	1	5	2	P35580;P35580-2		1523.72	0	0.002711										High	3.43183	0	1
	EEELQGALAR	1	5	2	P35580;P35580-2		1115.57	0	0.004035										High	3.02861	0	0
	KFDQLLAEEK	2	21	4	P35580;P35580-2;Q7Z406-6;P35579	Q4(Deamidated)	1221.64	0	0.00559										High	2.97789	0	1
	DHNIPGELER	1	2	1	P35580		1179.57	0	0.0005074										High	2.76792	0	0
	RHAEQERDELADEITNSASGK	1	5	2	P35580;P35580-2	N16(Deamidated)	2357.1	0	0.003782										High	2.76385	0	2
	EIFMQVEDER	1	5	2	P35580;P35580-2		1295.59	0	0.001155										High	2.70069	0	0
	QLHLEGASLELSDDDTESKTSDVNETQPPQSE	1	5	2	P35580;P35580-2		3499.58	0.001	0.004131	High	4.02546	0										1
	KMEEEILLLEDQNSK	2	5	2	P35580;P35580-2		1818.92	0.001	0.005541	High	2.84018	0							High	3.38994	0	1
	QVLALQSQLADTK	2	5	2	P35580;P35580-2	Q6(Deamidated); Q8(Deamidated)	1416.76	0.001	0.005278	High	2.79126	0				High	2.59869	0				0
	AMVNKDDIQK	4	8	2	P35580;P35580-2		1161.59	0.001	0.004012	High	2.70663	0	High	2.75029	0	High	2.80963	0	High	2.86993	0	1
	QTKVEGELEEMERK	3	5	2	P35580;P35580-2		1705.84	0.001	0.002613	High	2.70118	0				High	2.49295	0	High	3.0692	0	2
	REQEVAELKK	3	5	2	P35580;P35580-2		1229.68	0.001	0.01955	High	2.65022	0				High	2.32698	0				2
	ALEEALEAK	4	15	2	P35580;P35580-2		973.522	0.001	0.04103	High	2.64928	0	High	2.84377	0	High	2.51356	0	High	2.6792	0	0
	KQQQLSALK	2	5	2	P35580;P35580-2		1043.62	0.001	0.01904	High	2.53104	0				High	2.50218	0				1
	DLSEELEALK	4	5	2	P35580;P35580-2		1146.59	0.001	0.01354	High	2.4528	0	High	2.79122	0	High	2.4445	0	High	2.3207	0	0
	SALLDEKR	5	5	2	P35580;P35580-2		931.52	0.001	0.008805	High	2.34955	0	High	2.66521	0	High	2.4213	0	High	2.7637	0	1
	ATISALEAK	3	5	2	P35580;P35580-2		903.514	0.001	0.03933	High	2.31324	0	High	2.81607	0				High	2.7587	0	0
	LQELEGAVK	6	5	2	P35580;P35580-2		986.552	0.001	0.0188	High	2.20201	0	High	2.75309	0	High	2.09803	0	High	2.58217	0	0
	GGPISFSSSR	7	5	2	P35580;P35580-2		994.495	0.001	0.007341	High	2.15976	0	High	2.48661	0	High	2.45419	0	High	2.56567	0	0
	IAQLEEELEEEQSNMELLNDRFR	2	5	2	P35580;P35580-2	M15(Oxidation); N19(Deamidated)	2852.33	0.001	0.01375	High	2.12071	0				High	2.46533	0				1
	RQLEEAEEEATRANASR	2	5	2	P35580;P35580-2		1959.95	0.001	0.006103	High	2.10331	0							High	2.91256	0	2
	LQAQMKDYQR	3	5	2	P35580;P35580-2	M5(Oxidation)	1296.64	0.001	0.002125	High	2.07025	0				High	2.75616	0				1
	KLDAQVQELHAK	4	5	2	P35580;P35580-2	Q5(Deamidated)	1380.75	0.001	0.007978	High	2.01746	0				High	2.67478	0	High	3.00648	0	1
	QKLNLSSR	2	5	2	P35580;P35580-2		945.547	0.001	0.01416	High	2.01617	0				High	2.09095	0				1
	HQQLLEEK	5	5	2	P35580;P35580-2		1024.54	0.001	0.01269	High	1.92972	0	High	2.84588	0	High	2.13932	0	High	2.09609	0	0
	IVFQEFR	4	10	2	P35580;P35580-2	Q4(Deamidated)	939.494	0.001	0.0159	High	1.92718	0	High	2.34076	0	High	1.91056	0	High	1.70489	0	0
	KALEEETKNHEAQIQDMR	3	5	2	P35580;P35580-2	M17(Oxidation)	2186.05	0.001	0.002769	High	1.80302	0				High	2.71805	0				2
	ELEAELEDERKQR	2	5	2	P35580;P35580-2	Q12(Deamidated)	1645.8	0.001	0.006004	High	1.722	0				High	1.79307	0				2
	HADQYKEQMEK	3	5	2	P35580;P35580-2		1406.64	0.001	0.006705	High	1.64498	0				High	2.18849	0				1
	AMVNKDDIQKMNPPK	2	7	2	P35580;P35580-2	M2(Oxidation); M11(Oxidation)	1760.87	0.001	0.008736	High	1.63917	0				High	2.23525	0				2
	ASRDEIFAQSKESEK	3	5	2	P35580;P35580-2	Q9(Deamidated)	1725.83	0.001	0.01617	High	1.61992	0				High	2.78177	0	High	2.56186	0	2
	IAQLEEELEEEQSNMELLNDR	3	5	2	P35580;P35580-2	Q3(Deamidated); Q12(Deamidated)	2534.16	0.001	0.04978				High	4.29815	0							0
	QLEEEKNSLQEQQEEEEEARK	6	5	2	P35580;P35580-2	Q12(Deamidated)	2604.19	0.001	0.02242				High	3.71031	0	High	2.72806	0	High	3.10296	0	2
	TTLQVDTLNAELAAERSAAQK	2	5	2	P35580;P35580-2		2230.16	0.001	0.01367				High	3.46608	0				High	3.38172	0	1
	DDVGKNVHELEK	2	14	2	P35580;P35580-2		1382.69	0.001	0.03657				High	2.91939	0				High	2.49959	0	1
	YEILTPNAIPK	4	12	3	P35580;P35580-2;Q7Z406-6	N7(Deamidated)	1259.69	0.001	0.005912				High	2.56884	0	High	2.58433	0	High	2.91046	0	0
	LVWIPSER	2	8	2	P35580;P35580-2		999.563	0.001	0.04086				High	2.3158	0	High	2.05404	0				0
	AMVNKDDIQK	4	8	2	P35580;P35580-2	M2(Oxidation)	1177.59	0.001	0.00766				High	2.27673	0	High	2.25892	0				1
	TQLEELEDELQATEDAKLR	1	16	3	P35580;P35580-2;P35579	Q11(Deamidated)	2232.09	0.001	0.00202							High	2.94341	0				1
	MQAHIQDLEEQLDEEEGARQK	1	5	2	P35580;P35580-2	M1(Oxidation); Q20(Deamidated)	2514.14	0.001	0.01535							High	2.63079	0				1
	KLQAQMKDYQR	4	5	2	P35580;P35580-2	Q5(Deamidated)	1409.72	0.001	0.01479							High	2.60958	0	High	2.68301	0	2
	VVSSVLQFGNISFK	2	5	2	P35580;P35580-2	N10(Deamidated)	1525.83	0.001	0.01131							High	2.48206	0				0
	MEEEILLLEDQNSK	2	5	2	P35580;P35580-2	M1(Oxidation); N12(Deamidated)	1707.8	0.001	0.003778							High	2.3091	0				0
	KLQAQMKDYQR	2	5	2	P35580;P35580-2	Q5(Deamidated); M6(Oxidation)	1425.71	0.001	0.002013							High	2.10883	0				2
	VEDMAELTCLNEASVLHNLKDR	1	7	2	P35580;P35580-2	C9(Carbamidomethyl)	2557.24	0.001	0.01062										High	3.89762	0	1
	ALEEALEAKEEFERQNK	2	5	2	P35580;P35580-2	Q15(Deamidated)	2035	0.001	0.01096										High	3.6768	0	2
	KMEEEILLLEDQNSK	3	5	2	P35580;P35580-2	N13(Deamidated)	1819.9	0.001	0.01235										High	3.67578	0	1
	TTLQVDTLNAELAAERSAAQKSDNAR	1	5	2	P35580;P35580-2	Q4(Deamidated)	2774.42	0.001	0.01307										High	2.77844	0	2
	ADMEDLMSSK	2	5	2	P35580;P35580-2		1126.47	0.001	0.0226										High	2.57485	0	0
	VEEEEERNQILQNEKK	2	5	2	P35580;P35580-2	Q12(Deamidated)	2015.98	0.001	0.01953										High	2.47504	0	2
	IRNKQEVMISDLEER	2	5	2	P35580;P35580-2	M8(Oxidation)	1875.96	0.002	0.01224	High	2.86529	0							High	3.00396	0	2
	QLLQANPILESFGNAK	3	5	2	P35580;P35580-2	Q1(Deamidated); N14(Deamidated)	1744.91	0.002	0.009966	High	2.79486	0										0
	LRLEVNMQAMK	3	5	2	P35580;P35580-2	M7(Oxidation); M10(Oxidation)	1364.7	0.002	0.06425	High	2.32079	0	High	2.52231	0	High	2.39368	0				1
	LEVNMQAMK	5	5	2	P35580;P35580-2	M8(Oxidation)	1079.52	0.002	0.0576	High	2.25978	0	High	2.62582	0				High	2.37256	0	0
	IVFQEFR	9	10	2	P35580;P35580-2		938.51	0.002	0.04391	High	2.11411	0	High	2.17177	0	High	1.70878	0	High	1.98261	0	0
	EQEVAELKK	2	5	2	P35580;P35580-2		1073.58	0.002	0.03175	High	2.01528	0				High	2.12017	0				1
	NTNPNFVR	6	9	3	P35580;P35580-2;P35579	N5(Deamidated)	962.469	0.002	0.03028	High	1.43175	0	High	2.31341	0	High	1.27678	0	High	2.51423	0	0
	YLFVDR	4	8	2	P35580;P35580-2		812.429	0.002	0.04341	High	1.17163	0				High	1.35634	0	High	1.70759	0	0
	LEVNMQAMK	2	5	2	P35580;P35580-2	N4(Deamidated)	1064.51	0.002	0.05929				High	2.92194	0							0
	LEVNMQAMK	2	5	2	P35580;P35580-2		1063.53	0.002	0.05916				High	2.84822	0				High	2.56198	0	0
	ALAYDKLEK	3	5	2	P35580;P35580-2		1050.58	0.002	0.02381				High	2.81198	0	High	2.22496	0	High	2.99696	0	1
	LEVNMQAMK	3	5	2	P35580;P35580-2	M5(Oxidation); M8(Oxidation)	1095.52	0.002	0.05129				High	2.37975	0				High	1.85523	0	0
	NTNPNFVR	3	9	3	P35580;P35580-2;P35579		961.485	0.002	0.06378				High	2.21982	0							0
	VLQQVKAESEHK	2	5	2	P35580;P35580-2	Q3(Deamidated)	1396.74	0.002	0.03701							High	2.82591	0				1
	LQLEKVTAEAK	2	11	2	P35580;P35580-2		1229.71	0.002	0.02747							High	2.4705	0	High	2.73065	0	1
	KLVWIPSER	2	8	2	P35580;P35580-2		1127.66	0.003	0.01988	High	2.38194	0				High	2.0883	0				1
	GDDETLHKNNALK	1	5	2	P35580;P35580-2	N10(Deamidated)	1455.71	0.003	0.0156	High	2.3498	0										1
	IAQLEEELEEEQSNMELLNDRFR	1	5	2	P35580;P35580-2	Q3(Deamidated); Q12(Deamidated); M15(Oxidation)	2853.33	0.003	0.06694										High	2.45487	0	1
	QLHLEGASLELSDDDTESKTSDVNETQPPQSE	2	5	2	P35580;P35580-2	Q1(Deamidated)	3500.57	0.004	0.1215				High	3.82481	0				High	3.58543	0	1
	LDAQVQELHAK	2	5	2	P35580;P35580-2	Q6(Deamidated)	1252.65	0.004	0.07137				High	2.70685	0				High	2.54544	0	0
	ALEQQVEEMR	1	5	2	P35580;P35580-2	Q4(Deamidated); Q5(Deamidated)	1234.56	0.004	0.1221				High	2.59398	0							0
	DEIFAQSK	2	5	2	P35580;P35580-2		937.463	0.004	0.1094				High	2.56224	0				High	2.24291	0	0
	NQILQNEK	1	5	2	P35580;P35580-2		986.527	0.004	0.1219				High	2.18378	0							0
	MNPPKFSK	2	24	5	P35580;P35580-2;Q7Z406-6;P35579;Q4G140	M1(Oxidation)	964.492	0.004	0.05858							High	1.27781	0				1
	LLIKQVR	1	5	2	P35580;P35580-2	Q5(Deamidated)	870.577	0.004	0.07947										High	1.40362	0	1
	NSLQEQQEEEEEARK	2	5	2	P35580;P35580-2	Q6(Deamidated)	1847.82	0.005	0.1305				High	2.56242	0							1
	CIIPNHEK	2	14	3	P35580;P35580-2;P35579	C1(Carbamidomethyl)	1010.51	0.005	0.07692				High	1.91506	0	High	1.54229	0				0
	HGFEAASIK	1	8	2	P35580;P35580-2		959.495	0.005	0.06976							High	1.92672	0				0
	QQQLSALK	2	5	2	P35580;P35580-2		915.526	0.006	0.1037				High	2.26128	0				High	2.17897	0	0
	ADEWLMK	4	9	3	P35580;P35580-2;P35579	M6(Oxidation)	908.418	0.006	0.119							High	1.80263	0	High	2.27411	0	0
	ALEQQVEEMRTQLEELEDELQATEDAK	1	5	2	P35580;P35580-2	Q4(Deamidated)	3176.47	0.006	0.1201										High	3.13472	0	1
	LRLEVNMQAMK	1	5	2	P35580;P35580-2	M10(Oxidation)	1348.71	0.006	0.1217										High	2.65922	0	1
	RGGPISFSSSR	1	5	2	P35580;P35580-2		1150.6	0.006	0.1183										High	2.20173	0	1
	LMATLRNTNPNFVR	1	9	3	P35580;P35580-2;P35579	M2(Oxidation); N9(Deamidated)	1663.86	0.007	0.05496	High	1.99835	0										1
	LQNELDNVSTLLEEAEKK	1	5	2	P35580;P35580-2	Q2(Deamidated); N3(Deamidated); N7(Deamidated)	2076.01	0.007	0.1317										High	4.04326	0	1
	AMVNKDDIQKMNPPK	1	7	2	P35580;P35580-2	M11(Oxidation)	1744.88	0.008	0.1101							High	2.05169	0				2
	YAEERDRAEAEAR	1	8	3	P35580;P35580-2;P35579		1565.73	0.008	0.1067							High	1.06166	0				2
	MNPPKFSK	1	24	5	P35580;P35580-2;Q7Z406-6;P35579;Q4G140		948.497	0.008	0.1528										High	1.98215	0	1
	NILAEQLQAETELFAEAEEMR	1	5	2	P35580;P35580-2	N1(Deamidated); Q8(Deamidated); M20(Oxidation)	2453.16	0.009	0.1224							High	2.42459	0				0
	LQELEGAVK	1	5	2	P35580;P35580-2	Q2(Deamidated)	987.535	0.009	0.1342							High	2.37346	0				0
	TSDVNETQPPQSE	1	5	2	P35580;P35580-2		1431.63	0.009	0.128							High	2.16194	0				0
P35580-2	Isoform 2 of Myosin-10 OS=Homo sapiens GN=MYH10 - [MYH10_HUMAN]	866.663	59.29	140	343	2116.55	60.99	134	631	1051.5	61.19	146	441	1887.84	62.3	166	566	1992	230.637	5.56689
	Sequence	# PSMs	# Proteins	# Protein Groups	Protein Group Accessions	Modifications	MH+ [Da]	q-Value	PEP	A2	XCorr A2	Probability A2	B2	XCorr B2	Probability B2	C2	XCorr C2	Probability C2	D2	XCorr D2	Probability D2	# Missed Cleavages
	IVGLDQVTGMTETAFGSAYK	24	5	2	P35580;P35580-2	M10(Oxidation)	2104.03	0	4.652e-09	High	4.9654	0	High	5.6029	0	High	3.36923	0	High	5.79593	0	0
	MQAHIQDLEEQLDEEEGAR	13	5	2	P35580;P35580-2		2241.01	0	3.625e-08	High	4.96311	0	High	5.84232	0	High	4.35512	0	High	7.37717	0	0
	MQAHIQDLEEQLDEEEGAR	12	5	2	P35580;P35580-2	M1(Oxidation)	2257	0	4.988e-06	High	4.92781	0	High	5.73413	0	High	4.74833	0	High	5.69176	0	0
	LQQELDDLTVDLDHQR	18	5	2	P35580;P35580-2	Q15(Deamidated)	1938.94	0	1.317e-06	High	4.71905	0	High	4.91744	0	High	3.80562	0	High	5.16746	0	0
	DAASLESQLQDTQELLQEETR	24	5	2	P35580;P35580-2		2404.15	0	1.9e-08	High	4.62918	0	High	6.19282	0	High	4.88093	0	High	6.49961	0	0
	LQNELDNVSTLLEEAEKK	14	5	2	P35580;P35580-2		2073.07	0	7.222e-07	High	4.58575	0	High	6.28113	0	High	3.61766	0	High	5.5282	0	1
	LQRELDDATEANEGLSR	4	5	2	P35580;P35580-2		1916.93	0	9.723e-05	High	4.47003	0	High	4.94796	0	High	3.5999	0	High	4.59291	0	1
	DAASLESQLQDTQELLQEETR	56	5	2	P35580;P35580-2	Q13(Deamidated)	2405.13	0	1.417e-07	High	4.3294	0	High	6.62502	0	High	4.59652	0	High	6.76893	0	0
	KTTLQVDTLNAELAAER	11	5	2	P35580;P35580-2		1873	0	4.56e-08	High	4.31466	0	High	4.91504	0	High	4.18968	0	High	5.05506	0	1
	NILAEQLQAETELFAEAEEMR	7	5	2	P35580;P35580-2	M20(Oxidation)	2451.17	0	1.12e-05	High	4.20949	0	High	6.08546	0	High	3.93101	0	High	5.90299	0	0
	HAEQERDELADEITNSASGK	17	5	2	P35580;P35580-2		2200.01	0	5.543e-06	High	4.17414	0	High	5.09863	0	High	3.97713	0	High	5.03346	0	1
	NTDQASMPENTVAQK	32	5	2	P35580;P35580-2	M7(Oxidation)	1649.75	0	2.801e-05	High	4.09465	0	High	4.70612	0	High	3.43612	0	High	4.17145	0	0
	NMDPLNDNVATLLHQSSDR	7	5	2	P35580;P35580-2		2140.01	0	5.401e-06	High	4.06141	0	High	5.02457	0	High	3.24139	0	High	4.81619	0	0
	LQQELDDLTVDLDHQR	24	5	2	P35580;P35580-2		1937.96	0	3.602e-07	High	4.02597	0	High	5.48457	0	High	3.84487	0	High	5.55483	0	0
	TQLEELEDELQATEDAK	17	16	3	P35580;P35580-2;P35579		1961.92	0	8.695e-07	High	3.9975	0	High	5.55788	0	High	3.63559	0	High	4.61434	0	0
	IAQLEEELEEEQSNMELLNDR	24	5	2	P35580;P35580-2	M15(Oxidation)	2548.17	0	3.094e-07	High	3.99031	0	High	5.40661	0	High	4.19511	0	High	5.53802	0	0
	TQLEELEDELQATEDAKLR	7	16	3	P35580;P35580-2;P35579		2231.11	0	3.539e-05	High	3.9781	0	High	3.83721	0	High	3.57858	0	High	5.21872	0	1
	HAEQERDELADEITNSASGK	14	5	2	P35580;P35580-2	Q4(Deamidated)	2201	0	0.0003555	High	3.96794	0	High	5.19955	0	High	3.86888	0	High	4.42768	0	1
	IGQLEEQLEQEAKER	6	5	2	P35580;P35580-2	Q10(Deamidated)	1800.9	0	2.105e-05	High	3.96383	0				High	2.78188	0	High	4.05517	0	1
	IGQLEEQLEQEAKER	9	5	2	P35580;P35580-2		1799.91	0	5.544e-06	High	3.94935	0	High	4.10103	0	High	3.50853	0	High	4.84701	0	1
	QLEEEKNSLQEQQEEEEEARK	7	5	2	P35580;P35580-2		2603.21	0	0.0005688	High	3.94417	0	High	5.24568	0	High	4.07085	0	High	4.24351	0	2
	MQAHIQDLEEQLDEEEGARQK	6	5	2	P35580;P35580-2		2497.16	0	1.078e-07	High	3.94151	0				High	4.09855	0	High	7.09408	0	1
	QLHLEGASLELSDDDTESK	4	5	2	P35580;P35580-2		2086.98	0	0.0006746	High	3.90347	0	High	4.90777	0	High	2.69925	0	High	4.31317	0	0
	ELQAQIAELQEDFESEK	19	5	2	P35580;P35580-2		2006.96	0	2.586e-05	High	3.87596	0	High	4.79238	0	High	3.3437	0	High	4.53006	0	0
	TTLQVDTLNAELAAER	13	5	2	P35580;P35580-2		1744.91	0	1.179e-08	High	3.87497	0	High	4.76076	0	High	3.50998	0	High	5.00855	0	0
	NKQEVMISDLEER	24	5	2	P35580;P35580-2	M6(Oxidation)	1606.78	0	5.443e-05	High	3.83068	0	High	4.4908	0	High	3.61167	0	High	4.37728	0	1
	ADMEDLMSSKDDVGK	3	5	2	P35580;P35580-2		1640.71	0	0.0002625	High	3.79458	0	High	4.15173	0				High	3.70622	0	1
	FAKDAASLESQLQDTQELLQEETR	4	5	2	P35580;P35580-2		2750.35	0	3.048e-06	High	3.7548	0				High	3.46484	0	High	5.36066	0	1
	QLLQANPILESFGNAK	28	5	2	P35580;P35580-2		1742.94	0	6.596e-05	High	3.75195	0	High	5.05333	0	High	3.93956	0	High	4.80584	0	0
	NKQGLETDNKELACEVK	8	5	2	P35580;P35580-2	C14(Carbamidomethyl)	1975.98	0	4.038e-06	High	3.73422	0	High	4.31696	0	High	3.85901	0	High	4.77891	0	2
	NMDPLNDNVATLLHQSSDR	9	5	2	P35580;P35580-2	M2(Oxidation)	2156	0	2.312e-05	High	3.69323	0	High	5.22834	0	High	2.40713	0	High	4.76586	0	0
	AQTKEQADFAVEALAK	7	10	2	P35580;P35580-2		1719.9	0	1.771e-06	High	3.67673	0	High	5.27122	0	High	3.84729	0	High	4.36202	0	1
	ADFCIIHYAGK	5	9	3	P35580;P35580-2;P35579	C4(Carbamidomethyl)	1294.62	0	9.784e-05	High	3.64329	0	High	4.00785	0	High	2.7032	0	High	4.20821	0	0
	IAQLEEELEEEQSNMELLNDR	18	5	2	P35580;P35580-2		2532.18	0	3.604e-09	High	3.6368	0	High	6.42784	0	High	3.41974	0	High	5.83244	0	0
	ALEEETKNHEAQIQDMR	11	5	2	P35580;P35580-2		2041.96	0	1.786e-06	High	3.63633	0	High	4.36658	0	High	2.31652	0	High	4.57166	0	1
	HGFEAASIKEER	6	8	2	P35580;P35580-2		1373.68	0	5.702e-06	High	3.63383	0	High	3.90078	0	High	3.40766	0	High	4.25573	0	1
	LQNELDNVSTLLEEAEKK	19	5	2	P35580;P35580-2	N7(Deamidated)	2074.05	0	9.699e-08	High	3.60056	0	High	4.93258	0	High	3.46201	0	High	5.06027	0	1
	IAQLEEELEEEQSNMELLNDR	10	5	2	P35580;P35580-2	Q12(Deamidated); M15(Oxidation)	2549.18	0	0.001669	High	3.57749	0	High	5.23873	0	High	4.26077	0	High	4.0225	0	0
	QVLALQSQLADTKK	8	5	2	P35580;P35580-2		1542.89	0	0.0001608	High	3.56332	0	High	4.60317	0	High	3.84362	0	High	5.14442	0	1
	VEDMAELTCLNEASVLHNLK	2	12	3	P35580;P35580-2;P35579	M4(Oxidation); C9(Carbamidomethyl)	2302.11	0	1.057e-05	High	3.56071	0	High	5.24634	0							0
	KVDDDLGTIESLEEAK	6	5	2	P35580;P35580-2		1761.87	0	9.663e-05	High	3.54626	0	High	3.91051	0	High	2.73945	0	High	4.69949	0	1
	LLKDAEALSQR	10	5	2	P35580;P35580-2		1243.7	0	0.0003013	High	3.51446	0	High	3.62934	0	High	3.88061	0	High	3.71858	0	1
	IAECSSQLAEEEEKAK	9	5	2	P35580;P35580-2	C4(Carbamidomethyl)	1821.86	0	1.16e-05	High	3.49503	0	High	5.28134	0	High	3.36524	0	High	4.6248	0	1
	NKQEVMISDLEER	11	5	2	P35580;P35580-2		1590.78	0	0.0003502	High	3.48577	0	High	4.2782	0	High	3.80866	0	High	4.26103	0	1
	DVDRIVGLDQVTGMTETAFGSAYK	2	3	2	P35580;P35580-2	M14(Oxidation)	2589.25	0	1.292e-05	High	3.48544	0				High	4.12798	0				1
	KKLDAQVQELHAK	3	5	2	P35580;P35580-2		1507.86	0	7.095e-05	High	3.4792	0				High	3.40634	0	High	3.52694	0	2
	KTTLQVDTLNAELAAER	10	5	2	P35580;P35580-2	N10(Deamidated)	1873.98	0	4.72e-05	High	3.475	0	High	4.4936	0	High	3.69659	0	High	4.5554	0	1
	IVGLDQVTGMTETAFGSAYK	17	5	2	P35580;P35580-2		2088.03	0	6.674e-07	High	3.47078	0	High	6.061	0	High	3.24856	0	High	5.6712	0	0
	ALEEALEAKEEFER	19	5	2	P35580;P35580-2		1663.82	0	2.164e-07	High	3.45621	0	High	4.21075	0	High	3.64561	0	High	4.65897	0	1
	QLLQANPILESFGNAK	48	5	2	P35580;P35580-2	N14(Deamidated)	1743.93	0	6.537e-05	High	3.44258	0	High	5.25267	0	High	3.74836	0	High	5.36549	0	0
	IGQLEEQLEQEAK	10	5	2	P35580;P35580-2	Q7(Deamidated)	1515.75	0	6.417e-05	High	3.40321	0	High	3.91557	0	High	2.96652	0	High	4.23998	0	0
	IGQLEEQLEQEAK	10	5	2	P35580;P35580-2		1514.77	0	2.488e-05	High	3.37278	0	High	4.83647	0	High	3.10542	0	High	4.23682	0	0
	LQNELDNVSTLLEEAEK	13	5	2	P35580;P35580-2		1944.98	0	7.186e-06	High	3.35728	0	High	4.23621	0	High	2.71108	0	High	4.52339	0	0
	QLEEEKNSLQEQQEEEEEAR	5	5	2	P35580;P35580-2		2475.11	0	2.741e-05	High	3.32663	0	High	6.30193	0	High	4.35658	0	High	4.66282	0	1
	VEEEEERNQILQNEKK	6	5	2	P35580;P35580-2		2015	0	0.005772	High	3.31759	0	High	3.72331	0	High	3.19622	0	High	3.09501	0	2
	KKVDDDLGTIESLEEAK	12	5	2	P35580;P35580-2		1889.97	0	0.0001408	High	3.31687	0	High	5.2267	0	High	3.56147	0	High	5.05081	0	2
	TTLQVDTLNAELAAER	17	5	2	P35580;P35580-2	Q4(Deamidated)	1745.89	0	5.968e-07	High	3.30276	0	High	5.03044	0	High	3.6485	0	High	4.85192	0	0
	QGLETDNKELACEVK	3	5	2	P35580;P35580-2	C12(Carbamidomethyl)	1733.84	0	0.0009065	High	3.30166	0				High	2.6324	0	High	2.82073	0	1
	MQAHIQDLEEQLDEEEGARQK	4	5	2	P35580;P35580-2	M1(Oxidation)	2513.16	0	2.075e-08	High	3.2833	0				High	4.66258	0	High	5.58373	0	1
	EDQSILCTGESGAGKTENTKK	7	21	4	P35580;P35580-2;Q7Z406-6;P35579	C7(Carbamidomethyl)	2253.07	0	0.000234	High	3.28166	0	High	4.85033	0	High	3.03129	0	High	4.52046	0	2
	IVGLDQVTGMTETAFGSAYK	5	5	2	P35580;P35580-2	Q6(Deamidated); M10(Oxidation)	2105.01	0	1.019e-06	High	3.27838	0	High	3.66616	0	High	4.18301	0	High	3.78727	0	0
	KEEELQGALAR	2	5	2	P35580;P35580-2	Q6(Deamidated)	1244.65	0	0.0007535	High	3.2739	0				High	2.52902	0				1
	MEEEILLLEDQNSK	19	5	2	P35580;P35580-2	M1(Oxidation)	1706.82	0	2.102e-06	High	3.27001	0	High	4.40034	0	High	2.86007	0	High	4.61145	0	0
	KLDAQVQELHAK	7	5	2	P35580;P35580-2		1379.76	0	0.0005209	High	3.26476	0	High	3.62858	0	High	3.16372	0	High	4.40518	0	1
	ALEEALEAKEEFERQNK	3	5	2	P35580;P35580-2		2034.01	0	0.0001657	High	3.26095	0							High	4.12907	0	2
	QEEELQAKDEELLK	9	5	2	P35580;P35580-2		1701.86	0	3.695e-06	High	3.24349	0	High	4.93137	0	High	3.18067	0	High	5.51847	0	1
	NTDQASMPENTVAQK	8	5	2	P35580;P35580-2		1633.75	0	1.567e-06	High	3.23392	0	High	4.00214	0	High	3.77265	0	High	5.11805	0	0
	IAQLEEELEEEQSNMELLNDR	2	5	2	P35580;P35580-2	Q12(Deamidated); N14(Deamidated); M15(Oxidation)	2550.16	0	0.001581	High	3.18117	0										0
	ELDDATEANEGLSR	19	5	2	P35580;P35580-2		1519.69	0	0.0001298	High	3.17115	0	High	4.18209	0	High	3.28695	0	High	4.11881	0	0
	MEIDLKDLEAQIEAANK	3	5	2	P35580;P35580-2	M1(Oxidation)	1946.98	0	2.707e-05	High	3.17006	0				High	3.09608	0	High	4.71631	0	1
	IVGLDQVTGMTETAFGSAYK	5	5	2	P35580;P35580-2	Q6(Deamidated)	2089.02	0	0.0003923	High	3.12383	0	High	4.45454	0	High	3.64317	0	High	4.2764	0	0
	DAEALSQRLEEK	6	5	2	P35580;P35580-2		1388.7	0	0.01003	High	3.10277	0	High	3.18236	0	High	2.28576	0	High	2.45849	0	1
	IAQLEEELEEEQSNMELLNDR	16	5	2	P35580;P35580-2	Q3(Deamidated)	2533.17	0	0.0001013	High	3.09447	0	High	5.38428	0	High	4.28671	0	High	5.995	0	0
	NLPIYSENIIEMYR	8	7	2	P35580;P35580-2		1754.88	0	0.0005096	High	3.09138	0	High	4.03103	0	High	2.47312	0	High	3.92572	0	0
	TVGQLYKESLTK	13	5	2	P35580;P35580-2		1366.76	0	0.007203	High	3.08541	0	High	3.43258	0	High	2.72344	0	High	3.4301	0	1
	KMEEEILLLEDQNSK	5	5	2	P35580;P35580-2	M2(Oxidation)	1834.91	0	0.0002109	High	3.08373	0				High	3.28706	0	High	3.58952	0	1
	DAASLESQLQDTQELLQEETRQK	12	5	2	P35580;P35580-2	Q17(Deamidated)	2661.31	0	3.951e-05	High	3.07313	0	High	6.23845	0	High	3.767	0	High	5.15223	0	1
	MQAHIQDLEEQLDEEEGAR	5	5	2	P35580;P35580-2	Q6(Deamidated)	2241.99	0	1.199e-06	High	3.06372	0	High	4.38409	0				High	5.36772	0	0
	QVLALQSQLADTK	15	5	2	P35580;P35580-2	Q8(Deamidated)	1415.77	0	0.0003217	High	3.05327	0	High	4.16255	0	High	2.96216	0	High	3.67342	0	0
	ALEEETKNHEAQIQDMR	16	5	2	P35580;P35580-2	M16(Oxidation)	2057.95	0	0.004484	High	3.05163	0	High	4.26085	0	High	2.81097	0	High	4.09802	0	1
	AGKLDPHLVLDQLR	5	9	3	P35580;P35580-2;P35579		1574.9	0	1.295e-05	High	3.04921	0				High	2.99613	0	High	3.25842	0	1
	VDDDLGTIESLEEAKK	6	5	2	P35580;P35580-2		1761.88	0	7.222e-05	High	3.04798	0	High	4.18313	0	High	2.03015	0	High	3.46367	0	1
	VVSSVLQFGNISFKK	6	5	2	P35580;P35580-2	N10(Deamidated)	1653.92	0	0.001116	High	3.03804	0				High	3.75438	0	High	3.14096	0	1
	VDDDLGTIESLEEAK	4	5	2	P35580;P35580-2		1633.78	0	5.676e-05	High	3.03798	0	High	5.01953	0							0
	QVLALQSQLADTK	8	5	2	P35580;P35580-2		1414.79	0	4.444e-05	High	3.02864	0	High	3.98834	0	High	2.92176	0	High	4.17267	0	0
	IAECSSQLAEEEEKAK	6	5	2	P35580;P35580-2	C4(Carbamidomethyl); Q7(Deamidated)	1822.84	0	0.0003138	High	3.00449	0	High	4.61565	0				High	4.05716	0	1
	ADMEDLMSSKDDVGKNVHELEK	7	5	2	P35580;P35580-2	M3(Oxidation)	2506.15	0	2.489e-05	High	2.98728	0	High	3.2585	0	High	2.51915	0	High	4.66049	0	2
	VIQYLAHVASSHK	3	6	2	P35580;P35580-2	Q3(Deamidated)	1453.78	0	0.001076	High	2.96978	0				High	2.59565	0	High	2.85088	0	0
	AKLQELEGAVK	3	5	2	P35580;P35580-2	Q4(Deamidated)	1186.67	0	0.0009812	High	2.95443	0	High	2.60626	0				High	2.8582	0	1
	IKKMEEEILLLEDQNSK	4	5	2	P35580;P35580-2	M4(Oxidation)	2076.09	0	0.004642	High	2.94953	0				High	3.1035	0	High	4.05828	0	2
	KMQAHIQDLEEQLDEEEGAR	4	5	2	P35580;P35580-2	M2(Oxidation)	2385.1	0	6.612e-05	High	2.9459	0				High	3.21378	0	High	3.17112	0	1
	AVIYNPATQADWTAKK	8	8	2	P35580;P35580-2		1776.93	0	2.731e-05	High	2.94201	0	High	3.74704	0	High	2.92083	0	High	4.21367	0	1
	KFDQLLAEEK	11	21	4	P35580;P35580-2;Q7Z406-6;P35579		1220.65	0	0.003255	High	2.93671	0	High	3.79673	0	High	2.97414	0	High	3.25074	0	1
	HEMPPHIYAISESAYR	4	7	2	P35580;P35580-2	M3(Oxidation)	1916.89	0	0.0002304	High	2.93322	0				High	2.54123	0	High	3.3472	0	0
	ELEAELEDERK	8	5	2	P35580;P35580-2		1360.66	0	0.008405	High	2.93037	0	High	3.41422	0	High	2.53071	0	High	2.91077	0	1
	DELADEITNSASGK	2	5	2	P35580;P35580-2		1449.67	0	0.0003964	High	2.90688	0	High	3.57618	0							0
	ELQAQIAELQEDFESEK	22	5	2	P35580;P35580-2	Q5(Deamidated)	2007.94	0	0.003558	High	2.89938	0				High	3.55593	0	High	4.3068	0	0
	DVDRIVGLDQVTGMTETAFGSAYK	6	3	2	P35580;P35580-2		2573.26	0	5.155e-07	High	2.88602	0	High	5.77386	0	High	3.6051	0	High	6.91985	0	1
	VIQYLAHVASSHK	13	6	2	P35580;P35580-2		1452.8	0	2.886e-05	High	2.88581	0	High	3.93495	0	High	2.88311	0	High	4.10712	0	0
	VEEEEERNQILQNEK	8	5	2	P35580;P35580-2		1886.91	0	1.85e-05	High	2.88459	0	High	4.02134	0	High	3.44508	0	High	4.50078	0	1
	ELDDATEANEGLSR	8	5	2	P35580;P35580-2	N9(Deamidated)	1520.68	0	2.51e-05	High	2.8796	0	High	4.56445	0	High	2.81888	0	High	4.20376	0	0
	QLEEAEEEATR	10	5	2	P35580;P35580-2		1304.6	0	0.000772	High	2.87824	0	High	3.27647	0	High	2.52902	0	High	3.73461	0	0
	KLQAQMKDYQR	3	5	2	P35580;P35580-2		1408.73	0	0.0009081	High	2.86766	0				High	3.29749	0	High	3.02702	0	2
	ADMEDLMSSKDDVGKNVHELEK	4	5	2	P35580;P35580-2		2490.15	0	1.072e-05	High	2.86116	0				High	2.50029	0	High	4.79781	0	2
	LDPHLVLDQLR	12	9	3	P35580;P35580-2;P35579		1318.75	0	0.0005438	High	2.85384	0	High	2.47633	0	High	1.99354	0	High	3.09491	0	0
	QTKVEGELEEMER	6	5	2	P35580;P35580-2		1577.75	0	0.01629	High	2.82697	0	High	3.97811	0	High	3.0934	0	High	3.83865	0	1
	TELEDTLDTTAAQQELR	4	5	2	P35580;P35580-2		1933.94	0	8.654e-07	High	2.80081	0	High	4.74794	0				High	3.1802	0	0
	VVSSVLQFGNISFK	6	5	2	P35580;P35580-2		1524.84	0	5.112e-06	High	2.79641	0	High	3.60442	0	High	2.66362	0	High	4.78361	0	0
	SDLLLEGFNNYR	19	5	2	P35580;P35580-2		1440.71	0	0.0001063	High	2.79379	0	High	3.66985	0	High	2.6936	0	High	2.77809	0	0
	HATALEELSEQLEQAK	4	5	2	P35580;P35580-2		1796.9	0	7.685e-06	High	2.77385	0	High	3.04146	0	High	2.45572	0	High	5.38021	0	0
	QRYEILTPNAIPK	5	12	3	P35580;P35580-2;Q7Z406-6	N9(Deamidated)	1543.85	0	0.001158	High	2.74385	0	High	3.41286	0	High	2.79521	0	High	3.5362	0	1
	QEEELQAKDEELLKVK	5	5	2	P35580;P35580-2		1929.02	0	9.338e-05	High	2.73849	0	High	4.56137	0				High	5.71263	0	2
	CNGVLEGIR	4	30	5	P35580;P35580-2;Q7Z406-6;P35579;Q9Y623	C1(Carbamidomethyl)	1017.52	0	0.01253	High	2.72508	0	High	2.669	0	High	2.55738	0	High	2.67284	0	0
	ALEQQVEEMR	16	5	2	P35580;P35580-2	M9(Oxidation)	1248.59	0	0.001114	High	2.71111	0	High	3.10593	0	High	2.43339	0	High	3.33582	0	0
	VVSSVLQFGNISFKK	11	5	2	P35580;P35580-2		1652.94	0	0.0001245	High	2.7026	0	High	3.26486	0	High	2.97771	0	High	3.84085	0	1
	MEIDLKDLEAQIEAANK	5	5	2	P35580;P35580-2		1930.98	0	0.0008008	High	2.70203	0	High	4.74464	0	High	2.66084	0	High	4.62391	0	1
	MEEEILLLEDQNSK	11	5	2	P35580;P35580-2		1690.82	0	7.699e-06	High	2.70113	0	High	4.56662	0	High	3.22418	0	High	4.68468	0	0
	LLKDAEALSQRLEEK	2	5	2	P35580;P35580-2		1742.96	0	0.0006495	High	2.68101	0							High	4.05539	0	2
	ELQAQIAELQEDFESEKASR	5	5	2	P35580;P35580-2		2321.13	0	3.393e-07	High	2.67942	0				High	3.79762	0	High	5.1609	0	1
	ASRDEIFAQSK	7	5	2	P35580;P35580-2		1251.63	0	0.02126	High	2.67031	0	High	3.00351	0	High	2.83925	0	High	2.30925	0	1
	ALEEETKNHEAQIQDMR	11	5	2	P35580;P35580-2	Q12(Deamidated); M16(Oxidation)	2058.94	0	0.0004477	High	2.65782	0	High	3.69056	0	High	2.68981	0	High	4.17545	0	1
	AVIYNPATQADWTAK	11	8	2	P35580;P35580-2		1648.83	0	0.0001188	High	2.65182	0	High	4.49239	0	High	2.48013	0	High	4.65158	0	0
	FDQLLAEEK	8	21	4	P35580;P35580-2;Q7Z406-6;P35579		1092.56	0	0.002772	High	2.64834	0	High	3.03742	0	High	2.42027	0	High	2.87921	0	0
	DVDRIVGLDQVTGMTETAFGSAYK	1	3	2	P35580;P35580-2	Q10(Deamidated); M14(Oxidation)	2590.26	0	0.0008532	High	2.63636	0										1
	HEMPPHIYAISESAYR	4	7	2	P35580;P35580-2		1900.9	0	0.0001852	High	2.62788	0				High	3.07793	0	High	3.45437	0	0
	TQLEELEDELQATEDAK	5	16	3	P35580;P35580-2;P35579	Q11(Deamidated)	1962.9	0	0.00051	High	2.62678	0	High	4.03398	0				High	4.29502	0	0
	ADMEDLMSSKDDVGKNVHELEK	7	5	2	P35580;P35580-2	M3(Oxidation); M7(Oxidation)	2522.13	0	0.0001625	High	2.62162	0	High	3.25898	0	High	3.20558	0	High	4.27958	0	2
	QVLALQSQLADTKK	5	5	2	P35580;P35580-2	Q6(Deamidated)	1543.87	0	0.00117	High	2.60352	0				High	3.12395	0	High	2.59324	0	1
	AKLQELEGAVK	4	5	2	P35580;P35580-2		1185.68	0	0.004124	High	2.59453	0	High	3.18301	0	High	3.09484	0	High	3.14136	0	1
	DHNIPQESPKPVK	3	3	1	P35580-2		1488.78	0	0.001147	High	2.58465	0	High	2.13015	0	High	2.81434	0				0
	QEVMISDLEER	4	5	2	P35580;P35580-2		1348.64	0	0.001153	High	2.5789	0	High	3.27844	0	High	2.24218	0	High	3.14862	0	0
	VDYKADEWLMK	15	9	3	P35580;P35580-2;P35579	M10(Oxidation)	1413.67	0	0.0001581	High	2.57499	0	High	2.97044	0	High	2.3969	0	High	3.43743	0	1
	ERNTDQASMPENTVAQK	5	5	2	P35580;P35580-2	M9(Oxidation)	1934.89	0	0.004661	High	2.56238	0	High	2.76353	0	High	2.21496	0	High	2.96901	0	1
	VEGELEEMER	4	5	2	P35580;P35580-2		1220.55	0	0.007287	High	2.56193	0	High	3.01686	0	High	2.0683	0	High	2.8425	0	0
	QRYEILTPNAIPK	6	12	3	P35580;P35580-2;Q7Z406-6		1542.87	0	0.02272	High	2.55957	0	High	3.46288	0	High	2.28486	0	High	3.33602	0	1
	VEEEEERNQILQNEK	17	5	2	P35580;P35580-2	N13(Deamidated)	1887.89	0	0.006205	High	2.55435	0	High	4.15541	0	High	2.6342	0	High	2.4356	0	1
	FDQLLAEEK	4	21	4	P35580;P35580-2;Q7Z406-6;P35579	Q3(Deamidated)	1093.54	0	0.006426	High	2.55307	0	High	2.47359	0	High	2.32946	0	High	2.93505	0	0
	AGVLAHLEEER	8	9	3	P35580;P35580-2;P35579		1223.64	0	9.587e-05	High	2.53264	0	High	2.92101	0	High	2.4585	0	High	3.48623	0	0
	VDYKADEWLMK	12	9	3	P35580;P35580-2;P35579		1397.68	0	4.257e-05	High	2.51422	0	High	3.07793	0	High	2.17874	0	High	3.57755	0	1
	VEGELEEMER	17	5	2	P35580;P35580-2	M8(Oxidation)	1236.54	0	0.0008862	High	2.5113	0	High	2.87376	0	High	2.49194	0	High	2.887	0	0
	FVAELWKDVDR	4	3	2	P35580;P35580-2		1377.72	0	0.006274	High	2.49079	0	High	2.19431	0				High	3.00621	0	1
	KEEELQGALAR	8	5	2	P35580;P35580-2		1243.66	0	0.0005881	High	2.48484	0	High	3.5038	0	High	2.77412	0	High	3.74543	0	1
	GDDETLHKNNALK	2	5	2	P35580;P35580-2		1454.72	0	0.0009322	High	2.44568	0				High	1.98769	0				1
	NLPIYSENIIEMYR	3	7	2	P35580;P35580-2	M12(Oxidation)	1770.87	0	9.224e-05	High	2.4387	0	High	4.44791	0	High	2.45349	0				0
	QEEELQAKDEELLK	7	5	2	P35580;P35580-2	Q6(Deamidated)	1702.84	0	0.0001417	High	2.43674	0	High	4.12801	0	High	2.56525	0	High	4.32838	0	1
	EDQSILCTGESGAGK	4	22	4	P35580;P35580-2;Q7Z406-6;P35579	C7(Carbamidomethyl)	1551.69	0	1.272e-05	High	2.39735	0	High	3.96387	0	High	2.17606	0	High	4.35023	0	0
	AQTKEQADFAVEALAK	7	10	2	P35580;P35580-2	Q6(Deamidated)	1720.88	0	3.201e-05	High	2.38909	0	High	4.97883	0	High	2.67345	0	High	5.05068	0	1
	IAECSSQLAEEEEKAKNLAK	1	5	2	P35580;P35580-2	C4(Carbamidomethyl)	2248.11	0	0.001541	High	2.38187	0										2
	ALELDPNLYR	8	10	2	P35580;P35580-2		1203.64	0	0.000395	High	2.37205	0	High	3.25852	0	High	1.7419	0	High	3.33304	0	0
	ELEAELEDER	4	5	2	P35580;P35580-2		1232.56	0	0.001875	High	2.34354	0	High	2.83834	0	High	1.88616	0	High	2.79303	0	0
	TGLEDPERYLFVDR	3	8	2	P35580;P35580-2		1709.85	0	0.002007	High	2.33841	0				High	1.99881	0	High	2.26435	0	1
	KLQAQMKDYQR	2	5	2	P35580;P35580-2	M6(Oxidation)	1424.73	0	0.0001995	High	2.33158	0				High	3.01138	0				2
	FKATISALEAK	4	5	2	P35580;P35580-2		1178.68	0	0.0006823	High	2.2999	0	High	2.84129	0	High	2.74317	0	High	3.44892	0	1
	EDQSILCTGESGAGKTENTK	4	21	4	P35580;P35580-2;Q7Z406-6;P35579	C7(Carbamidomethyl)	2124.97	0	8.893e-06	High	2.22203	0	High	4.70129	0	High	2.02241	0	High	3.72079	0	1
	VEGELEEMERK	7	5	2	P35580;P35580-2		1348.64	0	0.00106	High	2.19412	0	High	3.72292	0	High	2.55384	0	High	3.7209	0	1
	DAASLESQLQDTQELLQEETRQK	4	5	2	P35580;P35580-2		2660.31	0	1.652e-07	High	2.18651	0	High	5.03517	0	High	2.52667	0	High	5.58013	0	1
	ALELDPNLYR	2	10	2	P35580;P35580-2	N7(Deamidated)	1204.62	0	0.001549	High	2.18192	0				High	2.09167	0				0
	SDLLLEGFNNYR	11	5	2	P35580;P35580-2	N9(Deamidated)	1441.7	0	9.206e-05	High	2.1556	0	High	3.38132	0	High	2.68869	0	High	3.08578	0	0
	ALEQQVEEMR	5	5	2	P35580;P35580-2		1232.59	0	0.00214	High	2.14093	0	High	3.46773	0	High	2.19464	0	High	3.07952	0	0
	ADMEDLMSSKDDVGK	7	5	2	P35580;P35580-2	M3(Oxidation)	1656.71	0	0.01464	High	2.09022	0	High	3.2009	0	High	2.5648	0	High	3.4561	0	1
	LDPHLVLDQLR	2	9	3	P35580;P35580-2;P35579	Q9(Deamidated)	1319.73	0	0.0004516	High	2.08741	0							High	2.42227	0	0
	NMDPLNDNVATLLHQSSDR	8	5	2	P35580;P35580-2	M2(Oxidation); N6(Deamidated)	2156.99	0	0.001321	High	2.08565	0	High	3.6228	0	High	2.42158	0				0
	EQADFAVEALAK	2	10	2	P35580;P35580-2	Q2(Deamidated)	1292.64	0	0.01396	High	2.05312	0	High	2.85146	0							0
	EIFMQVEDERR	5	5	2	P35580;P35580-2	M4(Oxidation)	1467.69	0	0.01477	High	2.04482	0	High	2.45598	0	High	1.89992	0	High	2.24972	0	1
	QTKVEGELEEMER	6	5	2	P35580;P35580-2	M11(Oxidation)	1593.74	0	0.0003298	High	2.03183	0	High	3.29723	0	High	3.36699	0	High	2.62389	0	1
	TGLEDPER	4	8	2	P35580;P35580-2		916.437	0	0.00201	High	1.98181	0	High	1.86803	0	High	2.05181	0	High	2.14242	0	0
	QLEEAEEEATRANASR	4	5	2	P35580;P35580-2		1803.85	0	0.0038	High	1.88454	0	High	3.32683	0	High	1.80844	0	High	2.36414	0	1
	EIFMQVEDERR	5	5	2	P35580;P35580-2		1451.69	0	0.002276	High	1.82077	0	High	2.11985	0	High	1.93089	0	High	3.25922	0	1
	YEILTPNAIPK	6	12	3	P35580;P35580-2;Q7Z406-6		1258.7	0	0.003073	High	1.80465	0	High	2.9408	0	High	2.05544	0	High	2.65055	0	0
	ELEAELEDERKQR	5	5	2	P35580;P35580-2		1644.82	0	0.003619	High	1.65475	0	High	2.30599	0	High	1.95561	0	High	1.96939	0	2
	DAASLESQLQDTQELLQEETRQK	6	5	2	P35580;P35580-2	Q13(Deamidated); Q17(Deamidated)	2662.28	0	0.003252				High	5.11064	0	High	3.20844	0				1
	NTDQASMPENTVAQK	12	5	2	P35580;P35580-2	Q14(Deamidated)	1634.73	0	3.77e-05				High	4.9694	0	High	2.77521	0	High	4.43605	0	0
	CMLQDREDQSILCTGESGAGK	2	6	2	P35580;P35580-2	C1(Carbamidomethyl); C13(Carbamidomethyl)	2355.03	0	3.424e-05				High	4.88661	0				High	4.43574	0	1
	DAASLESQLQDTQELLQEETR	5	5	2	P35580;P35580-2	Q8(Deamidated); Q10(Deamidated)	2406.14	0	0.000184				High	4.63808	0							0
	INFDVTGYIVGANIETYLLEK	1	10	2	P35580;P35580-2		2372.24	0	0.007613				High	4.4769	0							0
	INFDVTGYIVGANIETYLLEK	2	10	2	P35580;P35580-2	N13(Deamidated)	2373.24	0	0.01557				High	4.39382	0							0
	NSLQEQQEEEEEARK	4	5	2	P35580;P35580-2		1846.84	0	0.000839				High	4.30631	0	High	2.90393	0	High	3.63425	0	1
	VEDMAELTCLNEASVLHNLK	2	12	3	P35580;P35580-2;P35579	C9(Carbamidomethyl)	2286.11	0	2.569e-06				High	4.3016	0				High	5.31487	0	0
	GDEVMVELAENGKK	4	8	2	P35580;P35580-2	N11(Deamidated)	1519.73	0	7.943e-05				High	4.26321	0	High	3.00942	0	High	4.3258	0	1
	NMDPLNDNVATLLHQSSDR	3	5	2	P35580;P35580-2	Q15(Deamidated)	2141	0	6.698e-05				High	4.04977	0				High	3.50326	0	0
	AVIYNPATQADWTAK	3	8	2	P35580;P35580-2	Q9(Deamidated)	1649.82	0	0.002473				High	4.03388	0				High	3.43541	0	0
	EDQSILCTGESGAGKTENTKK	6	21	4	P35580;P35580-2;Q7Z406-6;P35579	C7(Carbamidomethyl); N18(Deamidated)	2254.05	0	0.008447				High	4.01336	0				High	3.29092	0	2
	TFHIFYQLLSGAGEHLK	4	5	2	P35580;P35580-2		1961.03	0	0.0007632				High	3.94149	0							0
	RQLEEAEEEATR	4	5	2	P35580;P35580-2		1460.7	0	9.449e-05				High	3.82022	0	High	2.6136	0	High	4.54742	0	1
	NKQGLETDNKELACEVK	8	5	2	P35580;P35580-2	Q3(Deamidated); C14(Carbamidomethyl)	1976.96	0	0.000629				High	3.78361	0	High	2.96939	0	High	3.66162	0	2
	GDEVMVELAENGKK	4	8	2	P35580;P35580-2		1518.75	0	0.001486				High	3.7629	0				High	3.17612	0	1
	NKQEVMISDLEER	3	5	2	P35580;P35580-2	Q3(Deamidated)	1591.76	0	0.00593				High	3.72605	0				High	3.29071	0	1
	AVIYNPATQADWTAKK	5	8	2	P35580;P35580-2	Q9(Deamidated)	1777.91	0	0.0004059				High	3.67141	0	High	2.21915	0	High	3.84913	0	1
	GDEVMVELAENGKK	5	8	2	P35580;P35580-2	M5(Oxidation)	1534.74	0	0.004662				High	3.5565	0	High	2.18752	0	High	3.20545	0	1
	TELEDTLDTTAAQQELR	8	5	2	P35580;P35580-2	Q14(Deamidated)	1934.92	0	0.0006679				High	3.49626	0				High	2.94916	0	0
	SLEAEILQLQEELASSER	4	5	2	P35580;P35580-2		2045.04	0	1.483e-06				High	3.46186	0	High	3.5825	0	High	4.47349	0	0
	GDEVMVELAENGKK	8	8	2	P35580;P35580-2	M5(Oxidation); N11(Deamidated)	1535.73	0	0.0006159				High	3.43304	0	High	2.7157	0	High	3.1954	0	1
	ERNTDQASMPENTVAQK	2	5	2	P35580;P35580-2		1918.89	0	0.00022				High	3.42752	0				High	4.07289	0	1
	LDAQVQELHAK	4	5	2	P35580;P35580-2		1251.67	0	0.001357				High	3.37174	0				High	3.08148	0	0
	IAQLEEELEEEQSNMELLNDRFR	1	5	2	P35580;P35580-2	N14(Deamidated)	2836.33	0	0.01322				High	3.35873	0							1
	EQADFAVEALAK	2	10	2	P35580;P35580-2		1291.65	0	0.01575				High	3.3422	0				High	2.61339	0	0
	FLSNGYIPIPGQQDK	3	5	2	P35580;P35580-2		1676.87	0	0.0007526				High	3.32519	0				High	2.99704	0	0
	LKEIFMQVEDERR	2	5	2	P35580;P35580-2		1692.87	0	0.004799				High	3.30044	0							2
	LQAQMKDYQR	2	5	2	P35580;P35580-2		1280.64	0	0.003457				High	3.29155	0				High	3.00722	0	1
	CNGVLEGIR	4	21	4	P35580;P35580-2;Q7Z406-6;P35579	C1(Carbamidomethyl); N2(Deamidated)	1018.5	0	0.001351				High	3.13211	0				High	2.85787	0	0
	QLEEAEEEATR	3	5	2	P35580;P35580-2	Q1(Deamidated)	1305.58	0	0.0002935				High	3.08396	0	High	2.31901	0	High	3.13188	0	0
	IRNKQEVMISDLEER	2	5	2	P35580;P35580-2		1859.96	0	0.005802				High	3.05247	0				High	3.74825	0	2
	NSLQEQQEEEEEARKNLEK	3	5	2	P35580;P35580-2		2331.1	0	0.00207				High	3.04161	0	High	2.19057	0	High	3.46468	0	2
	QEVMISDLEER	4	5	2	P35580;P35580-2	M4(Oxidation)	1364.64	0	0.001946				High	2.98282	0	High	2.88626	0	High	2.86245	0	0
	HADQYKEQMEK	2	5	2	P35580;P35580-2	M9(Oxidation)	1422.63	0	0.001783				High	2.97965	0				High	3.9208	0	1
	NHEAQIQDMR	6	5	2	P35580;P35580-2		1241.57	0	0.003043				High	2.92082	0	High	2.02277	0	High	2.87856	0	0
	DAEALSQRLEEK	4	5	2	P35580;P35580-2	Q7(Deamidated)	1389.69	0	0.001677				High	2.89858	0	High	2.31413	0	High	3.81153	0	1
	ALEQQVEEMR	4	5	2	P35580;P35580-2	Q4(Deamidated)	1233.58	0	0.002566				High	2.8739	0				High	2.89332	0	0
	ADMEDLMSSKDDVGK	3	5	2	P35580;P35580-2	M3(Oxidation); M7(Oxidation)	1672.7	0	0.006004				High	2.87261	0	High	2.15843	0	High	2.98791	0	1
	LKEIFMQVEDER	2	5	2	P35580;P35580-2		1536.77	0	0.001926				High	2.81247	0				High	2.92563	0	1
	VEGELEEMERK	4	5	2	P35580;P35580-2	M8(Oxidation)	1364.64	0	0.004647				High	2.71432	0				High	3.39855	0	1
	TVGQLYKESLTK	4	5	2	P35580;P35580-2	Q4(Deamidated)	1367.74	0	0.01508				High	2.65566	0				High	2.25889	0	1
	QLEEAEEEATRANASR	5	5	2	P35580;P35580-2	N13(Deamidated)	1804.83	0	0.00107				High	2.64594	0	High	2.09636	0	High	3.562	0	1
	DYQRELEEAR	3	5	2	P35580;P35580-2		1308.62	0	0.02159				High	2.51619	0				High	2.68796	0	1
	ERNTDQASMPENTVAQK	1	5	2	P35580;P35580-2	N3(Deamidated)	1919.88	0	0.009402				High	2.44889	0							1
	LLKDAEALSQR	2	5	2	P35580;P35580-2	Q10(Deamidated)	1244.68	0	0.000336				High	2.15509	0				High	3.62253	0	1
	NILAEQLQAETELFAEAEEMR	3	5	2	P35580;P35580-2		2435.17	0	7.523e-07							High	4.19781	0	High	6.26352	0	0
	QLEEEKNSLQEQQEEEEEAR	7	5	2	P35580;P35580-2	N7(Deamidated)	2476.11	0	7.89e-05							High	3.93296	0	High	4.11309	0	1
	NTDQASMPENTVAQK	1	5	2	P35580;P35580-2	Q4(Deamidated); M7(Oxidation)	1650.73	0	4.546e-05							High	3.49801	0				0
	IAECSSQLAEEEEK	2	5	2	P35580;P35580-2	C4(Carbamidomethyl)	1622.72	0	1.203e-05							High	3.3102	0	High	3.70878	0	0
	ALEEETKNHEAQIQDMR	10	5	2	P35580;P35580-2	Q14(Deamidated)	2042.94	0	0.0008204							High	3.22776	0	High	4.21084	0	1
	ALEQQVEEMRTQLEELEDELQATEDAK	3	5	2	P35580;P35580-2	M9(Oxidation)	3191.5	0	2.576e-05							High	2.90659	0	High	5.39596	0	1
	QKKFDQLLAEEK	4	7	3	P35580;P35580-2;P35579		1476.81	0	0.005605							High	2.73356	0	High	3.71835	0	2
	HADQYKEQMEKANAR	2	5	2	P35580;P35580-2	Q8(Deamidated)	1819.84	0	0.001336							High	2.70327	0				2
	IAQLEEELEEEQSNMELLNDRFR	3	5	2	P35580;P35580-2	M15(Oxidation)	2851.34	0	0.0003781							High	2.6802	0	High	4.2066	0	1
	NMDPLNDNVATLLHQSSDR	1	5	2	P35580;P35580-2	M2(Oxidation); N6(Deamidated); N8(Deamidated)	2157.99	0	0.0004506							High	2.42166	0				0
	NSLQEQQEEEEEAR	2	5	2	P35580;P35580-2		1718.75	0	7.986e-05							High	2.26145	0	High	3.54619	0	0
	MQAHIQDLEEQLDEEEGAR	1	5	2	P35580;P35580-2	M1(Oxidation); Q11(Deamidated)	2258	0	3.551e-05										High	6.1822	0	0
	DVDRIVGLDQVTGMTETAFGSAYK	1	3	2	P35580;P35580-2	Q10(Deamidated)	2574.24	0	2.527e-06										High	6.10327	0	1
	FAKDAASLESQLQDTQELLQEETR	3	5	2	P35580;P35580-2	Q11(Deamidated)	2751.33	0	6.87e-06										High	5.80281	0	1
	ALEQQVEEMRTQLEELEDELQATEDAK	1	5	2	P35580;P35580-2	M9(Oxidation); Q21(Deamidated)	3192.5	0	0.0008203										High	4.80953	0	1
	MEEEILLLEDQNSK	2	5	2	P35580;P35580-2	N12(Deamidated)	1691.81	0	0.0001077										High	4.14623	0	0
	DKADFCIIHYAGK	1	9	3	P35580;P35580-2;P35579	C6(Carbamidomethyl)	1537.75	0	0.000109										High	4.12224	0	1
	KALEEETKNHEAQIQDMR	1	5	2	P35580;P35580-2		2170.06	0	0.002587										High	4.07393	0	2
	IRQLEEEKNSLQEQQEEEEEAR	1	5	2	P35580;P35580-2		2744.3	0	0.0003179										High	3.88499	0	2
	KVDDDLGTIESLEEAKK	1	5	2	P35580;P35580-2		1889.97	0	0.001464										High	3.8606	0	2
	RALEQQVEEMR	1	5	2	P35580;P35580-2		1388.69	0	0.000367										High	3.74738	0	1
	HATALEELSEQLEQAKR	1	5	2	P35580;P35580-2		1953	0	8.023e-05										High	3.64894	0	1
	CMLQDREDQSILCTGESGAGKTENTK	1	5	2	P35580;P35580-2	C1(Carbamidomethyl); M2(Oxidation); C13(Carbamidomethyl)	2944.31	0	0.001888										High	3.5826	0	2
	QLRADMEDLMSSK	1	5	2	P35580;P35580-2		1523.72	0	0.002711										High	3.43183	0	1
	EEELQGALAR	1	5	2	P35580;P35580-2		1115.57	0	0.004035										High	3.02861	0	0
	KFDQLLAEEK	2	21	4	P35580;P35580-2;Q7Z406-6;P35579	Q4(Deamidated)	1221.64	0	0.00559										High	2.97789	0	1
	RHAEQERDELADEITNSASGK	1	5	2	P35580;P35580-2	N16(Deamidated)	2357.1	0	0.003782										High	2.76385	0	2
	EIFMQVEDER	1	5	2	P35580;P35580-2		1295.59	0	0.001155										High	2.70069	0	0
	QLHLEGASLELSDDDTESKTSDVNETQPPQSE	1	5	2	P35580;P35580-2		3499.58	0.001	0.004131	High	4.02546	0										1
	KMEEEILLLEDQNSK	2	5	2	P35580;P35580-2		1818.92	0.001	0.005541	High	2.84018	0							High	3.38994	0	1
	QVLALQSQLADTK	2	5	2	P35580;P35580-2	Q6(Deamidated); Q8(Deamidated)	1416.76	0.001	0.005278	High	2.79126	0				High	2.59869	0				0
	AMVNKDDIQK	4	8	2	P35580;P35580-2		1161.59	0.001	0.004012	High	2.70663	0	High	2.75029	0	High	2.80963	0	High	2.86993	0	1
	QTKVEGELEEMERK	3	5	2	P35580;P35580-2		1705.84	0.001	0.002613	High	2.70118	0				High	2.49295	0	High	3.0692	0	2
	REQEVAELKK	3	5	2	P35580;P35580-2		1229.68	0.001	0.01955	High	2.65022	0				High	2.32698	0				2
	ALEEALEAK	4	15	2	P35580;P35580-2		973.522	0.001	0.04103	High	2.64928	0	High	2.84377	0	High	2.51356	0	High	2.6792	0	0
	KQQQLSALK	2	5	2	P35580;P35580-2		1043.62	0.001	0.01904	High	2.53104	0				High	2.50218	0				1
	DLSEELEALK	4	5	2	P35580;P35580-2		1146.59	0.001	0.01354	High	2.4528	0	High	2.79122	0	High	2.4445	0	High	2.3207	0	0
	SALLDEKR	5	5	2	P35580;P35580-2		931.52	0.001	0.008805	High	2.34955	0	High	2.66521	0	High	2.4213	0	High	2.7637	0	1
	ATISALEAK	3	5	2	P35580;P35580-2		903.514	0.001	0.03933	High	2.31324	0	High	2.81607	0				High	2.7587	0	0
	LQELEGAVK	6	5	2	P35580;P35580-2		986.552	0.001	0.0188	High	2.20201	0	High	2.75309	0	High	2.09803	0	High	2.58217	0	0
	GGPISFSSSR	7	5	2	P35580;P35580-2		994.495	0.001	0.007341	High	2.15976	0	High	2.48661	0	High	2.45419	0	High	2.56567	0	0
	IAQLEEELEEEQSNMELLNDRFR	2	5	2	P35580;P35580-2	M15(Oxidation); N19(Deamidated)	2852.33	0.001	0.01375	High	2.12071	0				High	2.46533	0				1
	RQLEEAEEEATRANASR	2	5	2	P35580;P35580-2		1959.95	0.001	0.006103	High	2.10331	0							High	2.91256	0	2
	LQAQMKDYQR	3	5	2	P35580;P35580-2	M5(Oxidation)	1296.64	0.001	0.002125	High	2.07025	0				High	2.75616	0				1
	KLDAQVQELHAK	4	5	2	P35580;P35580-2	Q5(Deamidated)	1380.75	0.001	0.007978	High	2.01746	0				High	2.67478	0	High	3.00648	0	1
	QKLNLSSR	2	5	2	P35580;P35580-2		945.547	0.001	0.01416	High	2.01617	0				High	2.09095	0				1
	HQQLLEEK	5	5	2	P35580;P35580-2		1024.54	0.001	0.01269	High	1.92972	0	High	2.84588	0	High	2.13932	0	High	2.09609	0	0
	IVFQEFR	4	10	2	P35580;P35580-2	Q4(Deamidated)	939.494	0.001	0.0159	High	1.92718	0	High	2.34076	0	High	1.91056	0	High	1.70489	0	0
	KALEEETKNHEAQIQDMR	3	5	2	P35580;P35580-2	M17(Oxidation)	2186.05	0.001	0.002769	High	1.80302	0				High	2.71805	0				2
	ELEAELEDERKQR	2	5	2	P35580;P35580-2	Q12(Deamidated)	1645.8	0.001	0.006004	High	1.722	0				High	1.79307	0				2
	HADQYKEQMEK	3	5	2	P35580;P35580-2		1406.64	0.001	0.006705	High	1.64498	0				High	2.18849	0				1
	AMVNKDDIQKMNPPK	2	7	2	P35580;P35580-2	M2(Oxidation); M11(Oxidation)	1760.87	0.001	0.008736	High	1.63917	0				High	2.23525	0				2
	ASRDEIFAQSKESEK	3	5	2	P35580;P35580-2	Q9(Deamidated)	1725.83	0.001	0.01617	High	1.61992	0				High	2.78177	0	High	2.56186	0	2
	IAQLEEELEEEQSNMELLNDR	3	5	2	P35580;P35580-2	Q3(Deamidated); Q12(Deamidated)	2534.16	0.001	0.04978				High	4.29815	0							0
	QLEEEKNSLQEQQEEEEEARK	6	5	2	P35580;P35580-2	Q12(Deamidated)	2604.19	0.001	0.02242				High	3.71031	0	High	2.72806	0	High	3.10296	0	2
	TTLQVDTLNAELAAERSAAQK	2	5	2	P35580;P35580-2		2230.16	0.001	0.01367				High	3.46608	0				High	3.38172	0	1
	DDVGKNVHELEK	2	14	2	P35580;P35580-2		1382.69	0.001	0.03657				High	2.91939	0				High	2.49959	0	1
	YEILTPNAIPK	4	12	3	P35580;P35580-2;Q7Z406-6	N7(Deamidated)	1259.69	0.001	0.005912				High	2.56884	0	High	2.58433	0	High	2.91046	0	0
	LVWIPSER	2	8	2	P35580;P35580-2		999.563	0.001	0.04086				High	2.3158	0	High	2.05404	0				0
	AMVNKDDIQK	4	8	2	P35580;P35580-2	M2(Oxidation)	1177.59	0.001	0.00766				High	2.27673	0	High	2.25892	0				1
	TQLEELEDELQATEDAKLR	1	16	3	P35580;P35580-2;P35579	Q11(Deamidated)	2232.09	0.001	0.00202							High	2.94341	0				1
	MQAHIQDLEEQLDEEEGARQK	1	5	2	P35580;P35580-2	M1(Oxidation); Q20(Deamidated)	2514.14	0.001	0.01535							High	2.63079	0				1
	KLQAQMKDYQR	4	5	2	P35580;P35580-2	Q5(Deamidated)	1409.72	0.001	0.01479							High	2.60958	0	High	2.68301	0	2
	KDHNIPQESPKPVK	1	3	1	P35580-2		1616.87	0.001	0.01192							High	2.54925	0				1
	VVSSVLQFGNISFK	2	5	2	P35580;P35580-2	N10(Deamidated)	1525.83	0.001	0.01131							High	2.48206	0				0
	MEEEILLLEDQNSK	2	5	2	P35580;P35580-2	M1(Oxidation); N12(Deamidated)	1707.8	0.001	0.003778							High	2.3091	0				0
	KLQAQMKDYQR	2	5	2	P35580;P35580-2	Q5(Deamidated); M6(Oxidation)	1425.71	0.001	0.002013							High	2.10883	0				2
	VEDMAELTCLNEASVLHNLKDR	1	7	2	P35580;P35580-2	C9(Carbamidomethyl)	2557.24	0.001	0.01062										High	3.89762	0	1
	ALEEALEAKEEFERQNK	2	5	2	P35580;P35580-2	Q15(Deamidated)	2035	0.001	0.01096										High	3.6768	0	2
	KMEEEILLLEDQNSK	3	5	2	P35580;P35580-2	N13(Deamidated)	1819.9	0.001	0.01235										High	3.67578	0	1
	TTLQVDTLNAELAAERSAAQKSDNAR	1	5	2	P35580;P35580-2	Q4(Deamidated)	2774.42	0.001	0.01307										High	2.77844	0	2
	ADMEDLMSSK	2	5	2	P35580;P35580-2		1126.47	0.001	0.0226										High	2.57485	0	0
	VEEEEERNQILQNEKK	2	5	2	P35580;P35580-2	Q12(Deamidated)	2015.98	0.001	0.01953										High	2.47504	0	2
	IRNKQEVMISDLEER	2	5	2	P35580;P35580-2	M8(Oxidation)	1875.96	0.002	0.01224	High	2.86529	0							High	3.00396	0	2
	QLLQANPILESFGNAK	3	5	2	P35580;P35580-2	Q1(Deamidated); N14(Deamidated)	1744.91	0.002	0.009966	High	2.79486	0										0
	LRLEVNMQAMK	3	5	2	P35580;P35580-2	M7(Oxidation); M10(Oxidation)	1364.7	0.002	0.06425	High	2.32079	0	High	2.52231	0	High	2.39368	0				1
	LEVNMQAMK	5	5	2	P35580;P35580-2	M8(Oxidation)	1079.52	0.002	0.0576	High	2.25978	0	High	2.62582	0				High	2.37256	0	0
	IVFQEFR	9	10	2	P35580;P35580-2		938.51	0.002	0.04391	High	2.11411	0	High	2.17177	0	High	1.70878	0	High	1.98261	0	0
	EQEVAELKK	2	5	2	P35580;P35580-2		1073.58	0.002	0.03175	High	2.01528	0				High	2.12017	0				1
	NTNPNFVR	6	9	3	P35580;P35580-2;P35579	N5(Deamidated)	962.469	0.002	0.03028	High	1.43175	0	High	2.31341	0	High	1.27678	0	High	2.51423	0	0
	YLFVDR	4	8	2	P35580;P35580-2		812.429	0.002	0.04341	High	1.17163	0				High	1.35634	0	High	1.70759	0	0
	LEVNMQAMK	2	5	2	P35580;P35580-2	N4(Deamidated)	1064.51	0.002	0.05929				High	2.92194	0							0
	LEVNMQAMK	2	5	2	P35580;P35580-2		1063.53	0.002	0.05916				High	2.84822	0				High	2.56198	0	0
	ALAYDKLEK	3	5	2	P35580;P35580-2		1050.58	0.002	0.02381				High	2.81198	0	High	2.22496	0	High	2.99696	0	1
	LEVNMQAMK	3	5	2	P35580;P35580-2	M5(Oxidation); M8(Oxidation)	1095.52	0.002	0.05129				High	2.37975	0				High	1.85523	0	0
	NTNPNFVR	3	9	3	P35580;P35580-2;P35579		961.485	0.002	0.06378				High	2.21982	0							0
	VLQQVKAESEHK	2	5	2	P35580;P35580-2	Q3(Deamidated)	1396.74	0.002	0.03701							High	2.82591	0				1
	LQLEKVTAEAK	2	11	2	P35580;P35580-2		1229.71	0.002	0.02747							High	2.4705	0	High	2.73065	0	1
	KLVWIPSER	2	8	2	P35580;P35580-2		1127.66	0.003	0.01988	High	2.38194	0				High	2.0883	0				1
	GDDETLHKNNALK	1	5	2	P35580;P35580-2	N10(Deamidated)	1455.71	0.003	0.0156	High	2.3498	0										1
	IAQLEEELEEEQSNMELLNDRFR	1	5	2	P35580;P35580-2	Q3(Deamidated); Q12(Deamidated); M15(Oxidation)	2853.33	0.003	0.06694										High	2.45487	0	1
	QLHLEGASLELSDDDTESKTSDVNETQPPQSE	2	5	2	P35580;P35580-2	Q1(Deamidated)	3500.57	0.004	0.1215				High	3.82481	0				High	3.58543	0	1
	LDAQVQELHAK	2	5	2	P35580;P35580-2	Q6(Deamidated)	1252.65	0.004	0.07137				High	2.70685	0				High	2.54544	0	0
	ALEQQVEEMR	1	5	2	P35580;P35580-2	Q4(Deamidated); Q5(Deamidated)	1234.56	0.004	0.1221				High	2.59398	0							0
	DEIFAQSK	2	5	2	P35580;P35580-2		937.463	0.004	0.1094				High	2.56224	0				High	2.24291	0	0
	NQILQNEK	1	5	2	P35580;P35580-2		986.527	0.004	0.1219				High	2.18378	0							0
	MNPPKFSK	2	24	5	P35580;P35580-2;Q7Z406-6;P35579;Q4G140	M1(Oxidation)	964.492	0.004	0.05858							High	1.27781	0				1
	LLIKQVR	1	5	2	P35580;P35580-2	Q5(Deamidated)	870.577	0.004	0.07947										High	1.40362	0	1
	NSLQEQQEEEEEARK	2	5	2	P35580;P35580-2	Q6(Deamidated)	1847.82	0.005	0.1305				High	2.56242	0							1
	CIIPNHEK	2	14	3	P35580;P35580-2;P35579	C1(Carbamidomethyl)	1010.51	0.005	0.07692				High	1.91506	0	High	1.54229	0				0
	HGFEAASIK	1	8	2	P35580;P35580-2		959.495	0.005	0.06976							High	1.92672	0				0
	QQQLSALK	2	5	2	P35580;P35580-2		915.526	0.006	0.1037				High	2.26128	0				High	2.17897	0	0
	ADEWLMK	4	9	3	P35580;P35580-2;P35579	M6(Oxidation)	908.418	0.006	0.119							High	1.80263	0	High	2.27411	0	0
	ALEQQVEEMRTQLEELEDELQATEDAK	1	5	2	P35580;P35580-2	Q4(Deamidated)	3176.47	0.006	0.1201										High	3.13472	0	1
	LRLEVNMQAMK	1	5	2	P35580;P35580-2	M10(Oxidation)	1348.71	0.006	0.1217										High	2.65922	0	1
	RGGPISFSSSR	1	5	2	P35580;P35580-2		1150.6	0.006	0.1183										High	2.20173	0	1
	LMATLRNTNPNFVR	1	9	3	P35580;P35580-2;P35579	M2(Oxidation); N9(Deamidated)	1663.86	0.007	0.05496	High	1.99835	0										1
	LQNELDNVSTLLEEAEKK	1	5	2	P35580;P35580-2	Q2(Deamidated); N3(Deamidated); N7(Deamidated)	2076.01	0.007	0.1317										High	4.04326	0	1
	AMVNKDDIQKMNPPK	1	7	2	P35580;P35580-2	M11(Oxidation)	1744.88	0.008	0.1101							High	2.05169	0				2
	YAEERDRAEAEAR	1	8	3	P35580;P35580-2;P35579		1565.73	0.008	0.1067							High	1.06166	0				2
	MNPPKFSK	1	24	5	P35580;P35580-2;Q7Z406-6;P35579;Q4G140		948.497	0.008	0.1528										High	1.98215	0	1
	NILAEQLQAETELFAEAEEMR	1	5	2	P35580;P35580-2	N1(Deamidated); Q8(Deamidated); M20(Oxidation)	2453.16	0.009	0.1224							High	2.42459	0				0
	LQELEGAVK	1	5	2	P35580;P35580-2	Q2(Deamidated)	987.535	0.009	0.1342							High	2.37346	0				0
	TSDVNETQPPQSE	1	5	2	P35580;P35580-2		1431.63	0.009	0.128							High	2.16194	0				0
P68133	Actin, alpha skeletal muscle OS=Homo sapiens GN=ACTA1 PE=1 SV=1 - [ACTS_HUMAN]	794.125	41.91	17	339	1373.61	49.6	23	423	1171.82	46.42	21	517	1534.29	47.21	24	489	377	42.0239	5.38916
	Sequence	# PSMs	# Proteins	# Protein Groups	Protein Group Accessions	Modifications	MH+ [Da]	q-Value	PEP	A2	XCorr A2	Probability A2	B2	XCorr B2	Probability B2	C2	XCorr C2	Probability C2	D2	XCorr D2	Probability D2	# Missed Cleavages
	HQGVMVGMGQKDSYVGDEAQSKR	33	36	3	P68133;Q53G99;E7EVS6	M5(Oxidation); Q10(Deamidated)	2524.16	0	4.625e-08	High	5.1283	0	High	4.90407	0	High	5.41769	0	High	5.70317	0	2
	HQGVMVGMGQKDSYVGDEAQSKR	26	36	3	P68133;Q53G99;E7EVS6	M5(Oxidation); M8(Oxidation)	2539.17	0	3.151e-08	High	4.73824	0	High	4.27711	0	High	4.04097	0	High	6.67189	0	2
	HQGVMVGMGQKDSYVGDEAQSKR	45	36	3	P68133;Q53G99;E7EVS6	M8(Oxidation)	2523.17	0	2.319e-08	High	4.6854	0	High	4.86585	0	High	5.11233	0	High	6.4165	0	2
	HQGVMVGMGQKDSYVGDEAQSKR	16	36	3	P68133;Q53G99;E7EVS6		2507.17	0	3.059e-09	High	4.61868	0	High	5.85761	0	High	5.69678	0	High	7.27916	0	2
	HQGVMVGMGQKDSYVGDEAQSKR	23	36	3	P68133;Q53G99;E7EVS6	M5(Oxidation); M8(Oxidation); Q10(Deamidated)	2540.15	0	3.546e-07	High	4.53194	0	High	4.21916	0	High	4.53324	0	High	5.67533	0	2
	HQGVMVGMGQKDSYVGDEAQSK	42	36	3	P68133;Q53G99;E7EVS6	M8(Oxidation)	2367.07	0	2.833e-06	High	4.36113	0	High	6.02709	0	High	4.15251	0	High	6.01417	0	1
	HQGVMVGMGQKDSYVGDEAQSK	12	36	3	P68133;Q53G99;E7EVS6	Q10(Deamidated)	2352.06	0	1.515e-08	High	4.26798	0	High	5.59481	0	High	5.01862	0	High	6.33728	0	1
	HQGVMVGMGQKDSYVGDEAQSK	33	36	3	P68133;Q53G99;E7EVS6	M8(Oxidation); Q10(Deamidated)	2368.06	0	2.417e-06	High	4.18358	0	High	5.28913	0	High	4.4582	0	High	5.95198	0	1
	HQGVMVGMGQKDSYVGDEAQSKR	3	36	3	P68133;Q53G99;E7EVS6	Q2(Deamidated); M5(Oxidation); Q10(Deamidated)	2525.14	0	2.642e-05	High	4.02596	0							High	6.08721	0	2
	HQGVMVGMGQKDSYVGDEAQSK	37	36	3	P68133;Q53G99;E7EVS6	M5(Oxidation); M8(Oxidation)	2383.06	0	4.998e-06	High	3.98858	0	High	5.71112	0	High	4.39968	0	High	5.46798	0	1
	SYELPDGQVITIGNER	48	40	7	Q562R1;Q9BYX7;P68133;B4DUI8;B4DW52;V9HVZ7;Q53G99	N14(Deamidated)	1791.88	0	2.023e-06	High	3.89053	0	High	4.89359	0	High	3.93667	0	High	4.74047	0	0
	HQGVMVGMGQKDSYVGDEAQSK	16	36	3	P68133;Q53G99;E7EVS6	Q2(Deamidated); M5(Oxidation); M8(Oxidation)	2384.06	0	0.0001159	High	3.82536	0	High	5.06506	0	High	3.0325	0	High	5.36605	0	1
	HQGVMVGMGQKDSYVGDEAQSK	15	36	3	P68133;Q53G99;E7EVS6		2351.08	0	5.975e-05	High	3.75407	0	High	5.76996	0	High	4.32654	0	High	5.47726	0	1
	SYELPDGQVITIGNER	201	40	7	Q562R1;Q9BYX7;P68133;B4DUI8;B4DW52;V9HVZ7;Q53G99		1790.89	0	0.0006453	High	3.69497	0	High	4.36043	0	High	3.65867	0	High	4.58082	0	0
	MQKEITALAPSTMK	42	33	3	P68133;B4DUI8;B4DW52	Q2(Deamidated); M13(Oxidation)	1565.79	0	0.0004245	High	3.69018	0	High	4.43341	0	High	3.44291	0	High	4.06087	0	1
	MQKEITALAPSTMK	52	33	3	P68133;B4DUI8;B4DW52		1548.81	0	1.623e-06	High	3.50712	0	High	4.5718	0	High	3.60939	0	High	4.67859	0	1
	MQKEITALAPSTMK	8	33	3	P68133;B4DUI8;B4DW52	Q2(Deamidated)	1549.8	0	6.151e-07	High	3.34993	0	High	4.70444	0	High	3.63512	0	High	4.80906	0	1
	YPIEHGIITNWDDMEK	44	15	2	P68133;B4DUI8		1960.91	0	0.0003337	High	3.27023	0	High	4.64845	0	High	3.248	0	High	5.20898	0	0
	MQKEITALAPSTMK	78	33	3	P68133;B4DUI8;B4DW52	M13(Oxidation)	1564.81	0	1.66e-05	High	3.23866	0	High	4.61899	0	High	3.60954	0	High	4.48774	0	1
	YPIEHGIITNWDDMEK	8	15	2	P68133;B4DUI8	N10(Deamidated)	1961.9	0	0.0008312	High	3.07593	0	High	4.15319	0	High	2.68986	0	High	4.09517	0	0
	IWHHTFYNELR	11	67	10	Q9BYX7;P68133;P0CG38;B4DW52;Q53G99;E7EVS6;L0R5C4;Q562M3;Q562W2;Q562U0		1515.75	0	0.001517	High	3.06769	0	High	3.62082	0	High	1.87793	0	High	2.58829	0	0
	SYELPDGQVITIGNER	10	40	7	Q562R1;Q9BYX7;P68133;B4DUI8;B4DW52;V9HVZ7;Q53G99	Q8(Deamidated); N14(Deamidated)	1792.86	0	0.0001875	High	3.05595	0	High	4.94249	0	High	3.55466	0	High	4.757	0	0
	YPIEHGIITNWDDMEK	45	15	2	P68133;B4DUI8	M14(Oxidation)	1976.9	0	0.004737	High	3.02413	0	High	4.50863	0	High	3.62038	0	High	4.35311	0	0
	MQKEITALAPSTMK	5	33	3	P68133;B4DUI8;B4DW52	M1(Oxidation); Q2(Deamidated); M13(Oxidation)	1581.78	0	3.647e-05	High	2.97663	0	High	3.15146	0	High	3.26873	0	High	4.50935	0	1
	HQGVMVGMGQK	83	38	4	Q562R1;P68133;Q53G99;E7EVS6	M5(Oxidation); M8(Oxidation)	1203.56	0	0.01544	High	2.90849	0	High	3.07082	0	High	2.59864	0	High	2.85045	0	0
	AVFPSIVGRPR	175	44	5	P68133;P0CG38;B4DW52;Q53G99;E7EVS6		1198.71	0	0.002069	High	2.90617	0	High	3.41803	0	High	2.61863	0	High	2.9895	0	0
	HQGVMVGMGQK	8	38	4	Q562R1;P68133;Q53G99;E7EVS6	Q10(Deamidated)	1172.56	0	6.886e-05	High	2.87227	0	High	3.93724	0	High	2.807	0	High	4.05806	0	0
	HQGVMVGMGQK	70	38	4	Q562R1;P68133;Q53G99;E7EVS6	M5(Oxidation)	1187.57	0	0.01142	High	2.85527	0	High	3.40253	0	High	2.8711	0	High	3.35089	0	0
	MQKEITALAPSTMK	65	33	3	P68133;B4DUI8;B4DW52	M1(Oxidation); M13(Oxidation)	1580.8	0	1.83e-05	High	2.84942	0	High	4.10771	0	High	3.41788	0	High	3.9648	0	1
	AGFAGDDAPR	39	46	6	P68133;P0CG38;B4DW52;Q53G99;E7EVS6;L0R5C4		976.45	0	0.002165	High	2.82474	0	High	3.07533	0	High	2.78709	0	High	3.28298	0	0
	EITALAPSTMK	80	34	4	P68133;B4DUI8;B4DW52;Q53G99		1161.62	0	0.004824	High	2.77506	0	High	2.81269	0	High	2.90885	0	High	3.27379	0	0
	HQGVMVGMGQK	24	38	4	Q562R1;P68133;Q53G99;E7EVS6		1171.57	0	0.0001699	High	2.71339	0	High	3.90103	0	High	3.06248	0	High	3.79448	0	0
	EITALAPSTMK	87	34	4	P68133;B4DUI8;B4DW52;Q53G99	M10(Oxidation)	1177.61	0	0.004045	High	2.6693	0	High	2.66314	0	High	2.71699	0	High	2.69447	0	0
	VAPEEHPTLLTEAPLNPK	8	16	2	P68133;B4DUI8		1956.05	0	6.391e-05	High	2.66726	0	High	4.882	0	High	2.56031	0	High	4.14949	0	0
	HQGVMVGMGQK	4	38	4	Q562R1;P68133;Q53G99;E7EVS6	Q2(Deamidated); Q10(Deamidated)	1173.54	0	0.000128	High	2.62673	0	High	4.02216	0	High	2.80104	0	High	4.06698	0	0
	DSYVGDEAQSK	13	37	4	P68133;B4DUI8;Q53G99;E7EVS6		1198.52	0	0.02167	High	2.58193	0	High	2.77143	0	High	2.40651	0	High	2.84557	0	0
	LDLAGRDLTDYLMK	37	31	6	Q562R1;P68133;B4DUI8;B4DW52;V9HVZ7;Q53G99	M13(Oxidation)	1639.84	0	0.01495	High	2.56464	0	High	3.10169	0	High	2.95064	0	High	3.51532	0	1
	EITALAPSTMKIK	7	34	4	P68133;B4DUI8;B4DW52;Q53G99		1402.8	0	0.001055	High	2.542	0	High	3.70921	0	High	2.49089	0	High	3.30251	0	1
	DSYVGDEAQSKR	59	37	4	P68133;B4DUI8;Q53G99;E7EVS6		1354.62	0	0.007687	High	2.54018	0	High	3.70746	0	High	2.80167	0	High	3.2065	0	1
	LDLAGRDLTDYLMK	26	31	6	Q562R1;P68133;B4DUI8;B4DW52;V9HVZ7;Q53G99		1623.84	0	0.000225	High	2.51799	0	High	3.22354	0	High	2.69802	0	High	3.90678	0	1
	DSYVGDEAQSK	4	37	4	P68133;B4DUI8;Q53G99;E7EVS6	Q9(Deamidated)	1199.51	0	0.005115	High	2.45953	0	High	3.00255	0	High	2.12723	0	High	3.05841	0	0
	DSYVGDEAQSKR	15	37	4	P68133;B4DUI8;Q53G99;E7EVS6	Q9(Deamidated)	1355.61	0	0.01791	High	2.44698	0	High	3.86373	0	High	2.60612	0	High	3.26181	0	1
	SYELPDGQVITIGNERFR	5	40	7	Q562R1;Q9BYX7;P68133;B4DUI8;B4DW52;V9HVZ7;Q53G99	N14(Deamidated)	2095.05	0	0.001793	High	2.31578	0				High	2.27835	0	High	3.29428	0	1
	EITALAPSTMKIK	7	34	4	P68133;B4DUI8;B4DW52;Q53G99	M10(Oxidation)	1418.79	0	0.002759	High	1.93712	0	High	3.43761	0	High	2.56173	0	High	2.91552	0	1
	MTQIMFETFNVPAMYVAIQAVLSLYASGR	1	13	2	P68133;B4DUI8	Q3(Deamidated); N10(Deamidated)	3253.61	0	0.000347				High	6.70895	0							0
	YPIEHGIITNWDDMEKIWHHTFYNELR	15	7	1	P68133		3457.65	0	7.135e-06				High	6.38744	0				High	4.53877	0	1
	YPIEHGIITNWDDMEKIWHHTFYNELR	3	7	1	P68133	N10(Deamidated)	3458.65	0	3.634e-06				High	5.84231	0				High	2.9378	0	1
	HQGVMVGMGQKDSYVGDEAQSKR	17	36	3	P68133;Q53G99;E7EVS6	Q10(Deamidated)	2508.16	0	5.861e-09				High	5.63725	0	High	5.20272	0	High	6.35843	0	2
	YPIEHGIITNWDDMEKIWHHTFYNELR	13	7	1	P68133	M14(Oxidation)	3473.63	0	0.0007645				High	5.53076	0				High	3.27595	0	1
	YPIEHGIITNWDDMEKIWHHTFYNELR	1	7	1	P68133	N10(Deamidated); N24(Deamidated)	3459.64	0	0.01265				High	5.42971	0							1
	MQKEITALAPSTMKIK	2	33	3	P68133;B4DUI8;B4DW52	M13(Oxidation)	1805.98	0	0.01723				High	3.39445	0				High	3.28238	0	2
	HQGVMVGMGQKDSYVGDEAQSKR	3	36	3	P68133;Q53G99;E7EVS6	Q2(Deamidated); Q10(Deamidated)	2509.14	0	3.002e-09				High	3.35912	0	High	3.45781	0	High	6.41366	0	2
	LDLAGRDLTDYLMKILTER	1	31	6	Q562R1;P68133;B4DUI8;B4DW52;V9HVZ7;Q53G99		2236.2	0	0.003754				High	3.20336	0							2
	MQKEITALAPSTMKIK	2	33	3	P68133;B4DUI8;B4DW52		1789.99	0	0.01809				High	2.98113	0				High	3.1758	0	2
	GYSFVTTAER	2	13	2	P68133;B4DUI8		1130.55	0	0.006543				High	2.61279	0				High	2.77496	0	0
	HQGVMVGMGQKDSYVGDEAQSKR	2	36	3	P68133;Q53G99;E7EVS6	M5(Oxidation); M8(Oxidation); Q10(Deamidated); Q20(Deamidated)	2541.14	0	3.046e-07							High	5.76153	0	High	4.66154	0	2
	HQGVMVGMGQKDSYVGDEAQSK	2	36	3	P68133;Q53G99;E7EVS6	Q2(Deamidated); Q10(Deamidated)	2353.04	0	0.001579							High	1.77996	0	High	3.75648	0	1
	LCYVALDFENEMATAASSSSLEK	1	13	2	P68133;B4DUI8	C2(Carbamidomethyl); M12(Oxidation)	2552.16	0	0.001303										High	3.55975	0	0
	LCYVALDFENEMATAASSSSLEK	1	13	2	P68133;B4DUI8	C2(Carbamidomethyl)	2536.16	0	0.001029										High	3.49352	0	0
	IKIIAPPERK	4	34	6	Q562R1;P68133;B4DUI8;B4DW52;V9HVZ7;Q53G99		1164.75	0.001	0.03352				High	2.43487	0	High	1.88886	0	High	2.73133	0	2
	HQGVMVGMGQK	4	38	4	Q562R1;P68133;Q53G99;E7EVS6	Q2(Deamidated); M5(Oxidation)	1188.55	0.001	0.008599							High	3.18076	0	High	3.45201	0	0
	EITALAPSTMKIKIIAPPER	1	32	4	P68133;B4DUI8;B4DW52;Q53G99		2179.25	0.001	0.009118										High	3.42633	0	2
	DLYANNVMSGGTTMYPGIADR	2	7	1	P68133	N5(Deamidated); N6(Deamidated)	2247.98	0.002	0.01304	High	2.74118	0				High	2.33691	0				0
	DLTDYLMK	8	31	6	Q562R1;P68133;B4DUI8;B4DW52;V9HVZ7;Q53G99	M7(Oxidation)	1014.48	0.002	0.03301				High	2.49493	0	High	2.26647	0	High	1.91396	0	0
	YPIEHGIITNWDDMEK	2	15	2	P68133;B4DUI8	N10(Deamidated); M14(Oxidation)	1977.89	0.002	0.03704										High	3.8439	0	0
	DLTDYLMK	8	31	6	Q562R1;P68133;B4DUI8;B4DW52;V9HVZ7;Q53G99		998.486	0.004	0.05801				High	2.39491	0	High	1.85033	0	High	1.54934	0	0
	IKIIAPPER	3	35	6	Q562R1;P68133;B4DUI8;B4DW52;V9HVZ7;Q53G99		1036.65	0.004	0.08078				High	2.37811	0	High	2.09943	0	High	2.85645	0	1
	EIVRDIKEK	1	35	6	P68133;P0CG38;B4DUI8;B4DW52;V9HVZ7;Q53G99		1129.66	0.004	0.05584							High	1.83167	0				2
H6VRF8	Keratin 1 OS=Homo sapiens GN=KRT1 PE=3 SV=1 - [H6VRF8_HUMAN]	662.684	59.01	47	279	187.28	38.98	22	59	269.628	55.59	36	122	242.136	53.11	33	74	644	66.013	8.11865
	Sequence	# PSMs	# Proteins	# Protein Groups	Protein Group Accessions	Modifications	MH+ [Da]	q-Value	PEP	A2	XCorr A2	Probability A2	B2	XCorr B2	Probability B2	C2	XCorr C2	Probability C2	D2	XCorr D2	Probability D2	# Missed Cleavages
	GGGGGGYGSGGSSYGSGGGSYGSGGGGGGGR	17	8	1	H6VRF8		2383.95	0	3.699e-10	High	5.32192	0	High	7.26107	0	High	5.23007	0	High	8.08759	0	0
	FLEQQNQVLQTKWELLQQVDTSTR	6	8	1	H6VRF8	Q18(Deamidated)	2933.51	0	3.046e-09	High	5.08431	0	High	3.19648	0	High	2.53468	0				1
	KQISNLQQSISDAEQR	2	8	1	H6VRF8		1844.95	0	5.855e-07	High	5.06815	0				High	3.62884	0				1
	MSGECAPNVSVSVSTSHTTISGGGSR	6	8	1	H6VRF8	M1(Oxidation); C5(Carbamidomethyl)	2581.16	0	6.728e-09	High	4.52548	0				High	3.69743	0	High	5.91998	0	0
	FSSCGGGGGSFGAGGGFGSR	11	7	1	H6VRF8	C4(Carbamidomethyl)	1765.73	0	2.177e-09	High	4.32847	0				High	3.75078	0	High	6.19304	0	0
	SKAEAESLYQSKYEELQITAGR	9	8	1	H6VRF8		2501.25	0	8.639e-06	High	4.30545	0	High	5.44567	0	High	3.55826	0	High	6.20807	0	2
	FLEQQNQVLQTKWELLQQVDTSTR	5	8	1	H6VRF8		2932.52	0	0.0008485	High	4.08481	0	High	3.37179	0	High	3.06007	0	High	4.28737	0	1
	GSYGSGGSSYGSGGGSYGSGGGGGGHGSYGSGSSSGGYR	21	7	1	H6VRF8		3312.31	0	1.351e-10	High	4.04136	0	High	7.39309	0	High	3.67313	0	High	8.10637	0	0
	AEAESLYQSKYEELQITAGR	7	8	1	H6VRF8		2286.12	0	5.347e-07	High	4.02767	0	High	5.98406	0	High	3.55119	0	High	6.07057	0	1
	NKLNDLEDALQQAK	5	8	1	H6VRF8	N4(Deamidated)	1600.82	0	0.0001456	High	3.98409	0										1
	MSGECAPNVSVSVSTSHTTISGGGSR	3	8	1	H6VRF8	M1(Oxidation); C5(Carbamidomethyl); N8(Deamidated)	2582.13	0	0.0002013	High	3.79625	0										0
	NKLNDLEDALQQAK	5	8	1	H6VRF8		1599.83	0	0.0003139	High	3.78283	0				High	2.96233	0				1
	AEAESLYQSKYEELQITAGR	1	8	1	H6VRF8	Q8(Deamidated)	2287.11	0	3.78e-08	High	3.77082	0										1
	QISNLQQSISDAEQRGENALK	4	8	1	H6VRF8		2329.17	0	3.61e-05	High	3.75311	0				High	2.80033	0	High	3.72685	0	1
	RTNAENEFVTIKK	1	8	1	H6VRF8		1549.83	0	3.845e-05	High	3.68319	0										2
	FLEQQNQVLQTK	16	12	4	;H6VRF8;P35908;Q0IIN1		1475.79	0	0.000715	High	3.63503	0	High	3.96366	0	High	3.20608	0	High	3.76178	0	0
	QISNLQQSISDAEQR	24	8	1	H6VRF8	Q7(Deamidated)	1717.84	0	0.001569	High	3.60492	0				High	3.06619	0	High	3.9149	0	0
	QISNLQQSISDAEQRGENALK	3	8	1	H6VRF8	Q14(Deamidated)	2330.16	0	0.00233	High	3.59858	0										1
	LNDLEDALQQAKEDLAR	2	8	1	H6VRF8		1941.99	0	4.527e-07	High	3.59267	0				High	2.25816	0				1
	SGYRSGGGFSSGSAGIINYQR	2	8	1	H6VRF8	N18(Deamidated)	2122	0	2.172e-08	High	3.5831	0										1
	QISNLQQSISDAEQR	11	8	1	H6VRF8		1716.85	0	1.219e-06	High	3.57858	0	High	4.2433	0	High	3.57788	0	High	4.36636	0	0
	MSGECAPNVSVSVSTSHTTISGGGSR	5	8	1	H6VRF8	C5(Carbamidomethyl)	2565.17	0	3.868e-08	High	3.57335	0				High	3.9794	0	High	6.23026	0	0
	FLEQQNQVLQTK	17	12	4	;H6VRF8;P35908;Q0IIN1	Q4(Deamidated); N6(Deamidated)	1477.76	0	0.0007265	High	3.5718	0										0
	WELLQQVDTSTR	16	8	1	H6VRF8		1475.75	0	0.0006112	High	3.5646	0	High	3.90515	0	High	3.14316	0	High	3.81411	0	0
	SGGGFSSGSAGIINYQR	10	8	1	H6VRF8		1657.79	0	4.268e-07	High	3.56424	0	High	5.03724	0	High	3.32963	0	High	4.34528	0	0
	LNDLEDALQQAK	1	8	1	H6VRF8		1357.7	0	7.461e-05	High	3.53406	0										0
	LDSELKNMQDMVEDYR	5	8	1	H6VRF8	M8(Oxidation)	2001.89	0	3.454e-05	High	3.51406	0				High	2.22207	0				1
	SKAEAESLYQSK	2	8	1	H6VRF8	Q10(Deamidated)	1341.65	0	3.628e-05	High	3.48363	0										1
	QISNLQQSISDAEQRGENALKDAK	1	8	1	H6VRF8	N18(Deamidated)	2644.32	0	0.002264	High	3.45041	0										2
	SGGGFSSGSAGIINYQR	9	8	1	H6VRF8	N14(Deamidated)	1658.78	0	1.175e-06	High	3.44935	0	High	4.87451	0	High	3.27955	0	High	4.52897	0	0
	TNAENEFVTIKK	17	8	1	H6VRF8	N5(Deamidated)	1394.72	0	0.0002001	High	3.36882	0				High	3.19035	0	High	3.69322	0	1
	WELLQQVDTSTR	14	8	1	H6VRF8	Q5(Deamidated)	1476.73	0	7.692e-05	High	3.35201	0				High	3.36205	0	High	3.86511	0	0
	FLEQQNQVLQTK	43	12	4	;H6VRF8;P35908;Q0IIN1	Q7(Deamidated)	1476.77	0	0.001033	High	3.34978	0	High	3.71469	0	High	3.5822	0	High	4.08813	0	0
	SLNNQFASFIDKVR	10	8	1	H6VRF8		1638.86	0	0.0002321	High	3.29743	0				High	2.97992	0	High	3.88716	0	1
	QISNLQQSISDAEQR	2	8	1	H6VRF8	Q1(Deamidated); Q6(Deamidated)	1718.82	0	0.0006762	High	3.25493	0										0
	NSKIEISELNR	5	8	1	H6VRF8	N1(Deamidated)	1303.68	0	0.0008571	High	3.24977	0										1
	SLDLDSIIAEVK	16	7	1	H6VRF8		1302.72	0	0.0001053	High	3.24786	0	High	3.68845	0	High	2.73947	0	High	3.70989	0	0
	NSKIEISELNR	10	8	1	H6VRF8		1302.7	0	0.0001762	High	3.24783	0	High	2.92138	0	High	3.20717	0	High	3.43986	0	1
	TNAENEFVTIK	6	8	1	H6VRF8	N2(Deamidated)	1266.62	0	4.285e-05	High	3.15429	0				High	2.17544	0				0
	NKYEDEINKR	2	26	4	H6VRF8;P13647;B4DRR0;P05787	N8(Deamidated)	1309.64	0	0.0002985	High	3.14964	0				High	1.98883	0				2
	LDSELKNMQDMVEDYR	3	8	1	H6VRF8		1985.9	0	3.625e-05	High	3.08465	0							High	4.39013	0	1
	TNAENEFVTIKK	15	8	1	H6VRF8		1393.73	0	0.0003046	High	3.06811	0	High	3.72274	0	High	3.59198	0	High	3.75232	0	1
	SDQSRLDSELKNMQDMVEDYR	2	8	1	H6VRF8	M13(Oxidation); M16(Oxidation)	2591.13	0	2.379e-05	High	3.03203	0										2
	SKAEAESLYQSK	8	8	1	H6VRF8		1340.67	0	6.019e-05	High	3.00325	0	High	3.81493	0	High	2.07412	0	High	3.24164	0	1
	LLRDYQELMNTK	5	8	1	H6VRF8		1523.79	0	0.001152	High	2.98009	0				High	2.75929	0				1
	SLNNQFASFIDK	5	8	1	H6VRF8		1383.69	0	0.001552	High	2.97755	0	High	3.71859	0	High	3.06648	0	High	3.67177	0	0
	NKYEDEINKR	5	26	4	H6VRF8;P13647;B4DRR0;P05787		1308.65	0	0.0007761	High	2.95612	0				High	2.75591	0	High	3.17745	0	2
	LDSELKNMQDMVEDYR	6	8	1	H6VRF8	M8(Oxidation); M11(Oxidation)	2017.88	0	0.000119	High	2.91788	0				High	2.47932	0				1
	AEAESLYQSK	4	8	1	H6VRF8		1125.54	0	0.01077	High	2.9014	0	High	3.57688	0	High	2.23815	0	High	2.99333	0	0
	MSGECAPNVSVSVSTSHTTISGGGSR	2	8	1	H6VRF8	C5(Carbamidomethyl); N8(Deamidated)	2566.16	0	2.92e-07	High	2.88548	0										0
	SLNNQFASFIDK	22	8	1	H6VRF8	Q5(Deamidated)	1384.67	0	0.0004796	High	2.87818	0				High	2.76031	0	High	3.04257	0	0
	DVDGAYMTKVDLQAK	3	8	1	H6VRF8		1653.82	0	1.635e-05	High	2.70173	0							High	2.12487	0	1
	LLRDYQELMNTK	3	8	1	H6VRF8	M9(Oxidation)	1539.78	0	0.00143	High	2.69825	0				High	2.52561	0				1
	SLNNQFASFIDK	3	8	1	H6VRF8	N3(Deamidated); Q5(Deamidated)	1385.66	0	0.001698	High	2.66979	0										0
	TNAENEFVTIK	5	8	1	H6VRF8		1265.63	0	0.006708	High	2.66358	0	High	3.68604	0	High	3.02829	0	High	3.59005	0	0
	YEELQITAGR	2	9	1	H6VRF8	Q5(Deamidated)	1180.58	0	0.0009814	High	2.59919	0				High	2.25639	0				0
	LDSELKNMQDMVEDYR	3	8	1	H6VRF8	M8(Oxidation); Q9(Deamidated); M11(Oxidation)	2018.86	0	0.00176	High	2.59192	0							High	2.67266	0	1
	SLNNQFASFIDKVR	6	8	1	H6VRF8	N4(Deamidated)	1639.84	0	0.001725	High	2.57271	0				High	1.91718	0				1
	LALDLEIATYR	5	31	4	Q6KB66-2;P05787;B4DRW1;H6VRF8		1277.71	0	1.122e-05	High	2.56434	0	High	3.54738	0	High	2.39837	0	High	3.65061	0	0
	TLLEGEESR	6	8	1	H6VRF8		1033.52	0	0.01594	High	2.526	0	High	2.65591	0	High	2.48669	0	High	2.64218	0	0
	TNAENEFVTIKK	1	8	1	H6VRF8	N2(Deamidated); N5(Deamidated)	1395.7	0	0.0002966	High	2.26526	0										1
	NMQDMVEDYR	8	8	1	H6VRF8	M5(Oxidation)	1316.53	0	0.003095	High	2.03369	0				High	1.50323	0	High	2.57782	0	0
	NMQDMVEDYR	2	8	1	H6VRF8		1300.53	0	0.001059				High	2.40468	0				High	2.9089	0	0
	FSSCGGGGGSFGAGGGFGSRSLVNLGGSK	1	7	1	H6VRF8	C4(Carbamidomethyl); N24(Deamidated)	2622.2	0.001	0.002596	High	3.27989	0										1
	TNAENEFVTIKKDVDGAYMTK	2	8	1	H6VRF8	M19(Oxidation)	2390.16	0.001	0.006272	High	3.1446	0										2
	RTNAENEFVTIK	1	8	1	H6VRF8		1421.74	0.001	0.006834	High	3.05768	0										1
	AEAESLYQSK	1	8	1	H6VRF8	Q8(Deamidated)	1126.53	0.001	0.005643	High	2.84389	0										0
	LLRDYQELMNTK	2	8	1	H6VRF8	Q6(Deamidated)	1524.77	0.001	0.004829	High	2.83721	0										1
	YEELQITAGR	6	9	1	H6VRF8		1179.6	0.001	0.01328	High	2.79414	0				High	2.19906	0	High	2.77447	0	0
	IEISELNR	8	10	3	;H6VRF8;P35908		973.532	0.001	0.005666	High	2.74734	0				High	2.62507	0	High	2.52603	0	0
	IEISELNR	2	10	3	;H6VRF8;P35908	N7(Deamidated)	974.515	0.001	0.006063	High	2.42966	0				High	2.44097	0				0
	NMQDMVEDYR	4	8	1	H6VRF8	M2(Oxidation); M5(Oxidation)	1332.52	0.001	0.002895	High	2.33964	0				High	1.87433	0				0
	KDVDGAYMTKVDLQAK	1	8	1	H6VRF8	M8(Oxidation)	1797.91	0.001	0.002938	High	2.30238	0										2
	DVDGAYMTKVDLQAK	1	8	1	H6VRF8	M7(Oxidation); Q13(Deamidated)	1670.79	0.001	0.007207	High	2.174	0										1
	SISISVAR	4	8	1	H6VRF8		832.488	0.001	0.04158	High	1.61206	0	High	2.27624	0	High	1.85742	0	High	2.07352	0	0
	AQYEDIAQK	2	7	1	H6VRF8		1065.52	0.001	0.04948				High	2.69563	0				High	1.95867	0	0
	AQYEDIAQK	2	7	1	H6VRF8	Q2(Deamidated)	1066.51	0.002	0.01222	High	2.22947	0										0
	DVDGAYMTKVDLQAK	1	8	1	H6VRF8	M7(Oxidation)	1669.81	0.002	0.01015	High	2.20006	0										1
	SLVNLGGSK	5	7	1	H6VRF8		874.499	0.002	0.04468	High	2.03919	0	High	2.34204	0	High	1.96227	0	High	2.35738	0	0
	SLVNLGGSK	2	7	1	H6VRF8	N4(Deamidated)	875.483	0.002	0.02451	High	2.01707	0				High	1.6226	0				0
	SGGGFSSGSAGIINYQRR	1	8	1	H6VRF8		1813.89	0.002	0.02714										High	2.66865	0	1
	SDQSRLDSELK	3	8	1	H6VRF8		1277.63	0.003	0.02033	High	2.2505	0				High	2.26859	0	High	2.42723	0	1
	DVDGAYMTK	4	8	1	H6VRF8	M7(Oxidation)	1015.44	0.003	0.04261	High	1.97024	0				High	1.43181	0				0
	NKYEDEINK	1	27	5	H6VRF8;P13647;B4DRR0;Q5XKE5;P05787		1152.55	0.005	0.03562	High	1.87202	0										1
	KDVDGAYMTK	1	8	1	H6VRF8		1127.54	0.005	0.08002							High	1.68697	0				1
	SDQSRLDSELK	1	8	1	H6VRF8	Q3(Deamidated)	1278.62	0.008	0.05684	High	1.39753	0										1
	SDQSRLDSELKNMQDMVEDYR	1	8	1	H6VRF8	M13(Oxidation); Q14(Deamidated); M16(Oxidation)	2592.12	0.009	0.07845	High	2.45821	0										2
	LDSELKNMQDMVEDYR	1	8	1	H6VRF8	Q9(Deamidated)	1986.88	0.009	0.06798	High	1.93423	0										1
V9HVZ7	Epididymis luminal protein 176 OS=Homo sapiens GN=HEL-176 PE=2 SV=1 - [V9HVZ7_HUMAN]	858.999	66.82	15	276	1274.38	75.78	20	297	947.721	83.86	21	318	1037.29	75.78	20	252	223	25.0195	5.65576
	Sequence	# PSMs	# Proteins	# Protein Groups	Protein Group Accessions	Modifications	MH+ [Da]	q-Value	PEP	A2	XCorr A2	Probability A2	B2	XCorr B2	Probability B2	C2	XCorr C2	Probability C2	D2	XCorr D2	Probability D2	# Missed Cleavages
	KDLYANTVLSGGTTMYPGIADR	31	20	3	B4DW52;V9HVZ7;Q53G99		2343.17	0	2.234e-06	High	5.5575	0	High	6.87612	0	High	5.82285	0	High	6.71086	0	1
	KDLYANTVLSGGTTMYPGIADR	60	20	3	B4DW52;V9HVZ7;Q53G99	M15(Oxidation)	2359.16	0	2.498e-07	High	5.14747	0	High	7.31421	0	High	6.00967	0	High	7.00324	0	1
	DLYANTVLSGGTTMYPGIADR	148	20	3	B4DW52;V9HVZ7;Q53G99		2215.07	0	4.675e-08	High	5.11073	0	High	6.36246	0	High	4.73762	0	High	6.61827	0	0
	DLYANTVLSGGTTMYPGIADR	136	20	3	B4DW52;V9HVZ7;Q53G99	M14(Oxidation)	2231.06	0	2.82e-07	High	4.95064	0	High	6.54891	0	High	5.15736	0	High	6.03523	0	0
	KDLYANTVLSGGTTMYPGIADR	11	20	3	B4DW52;V9HVZ7;Q53G99	N6(Deamidated)	2344.17	0	1.222e-06	High	4.80765	0	High	5.00222	0	High	4.88651	0	High	5.62612	0	1
	LCYVALDFEQEMATAASSSSLEK	50	20	3	B4DW52;V9HVZ7;Q53G99	C2(Carbamidomethyl)	2550.18	0	2.006e-06	High	4.71528	0	High	6.7592	0	High	4.29854	0	High	6.44484	0	0
	DLYANTVLSGGTTMYPGIADR	35	20	3	B4DW52;V9HVZ7;Q53G99	N5(Deamidated); M14(Oxidation)	2232.05	0	1.85e-06	High	4.68722	0	High	5.82645	0	High	4.47884	0	High	5.12619	0	0
	KDLYANTVLSGGTTMYPGIADR	14	20	3	B4DW52;V9HVZ7;Q53G99	N6(Deamidated); M15(Oxidation)	2360.17	0	4.462e-05	High	4.50197	0	High	7.20634	0	High	4.32034	0	High	5.49908	0	1
	DLYANTVLSGGTTMYPGIADR	27	20	3	B4DW52;V9HVZ7;Q53G99	N5(Deamidated)	2216.05	0	7.834e-09	High	4.42439	0	High	6.01441	0	High	4.8822	0	High	6.14966	0	0
	LCYVALDFEQEMATAASSSSLEK	16	20	3	B4DW52;V9HVZ7;Q53G99	C2(Carbamidomethyl); Q10(Deamidated); M12(Oxidation)	2567.15	0	7.356e-07	High	4.24058	0	High	5.48659	0	High	3.47318	0	High	5.79799	0	0
	LCYVALDFEQEMATAASSSSLEK	65	20	3	B4DW52;V9HVZ7;Q53G99	C2(Carbamidomethyl); M12(Oxidation)	2566.17	0	1.8e-07	High	4.14237	0	High	6.10792	0	High	4.49685	0	High	6.17228	0	0
	SYELPDGQVITIGNER	48	40	7	Q562R1;Q9BYX7;P68133;B4DUI8;B4DW52;V9HVZ7;Q53G99	N14(Deamidated)	1791.88	0	2.023e-06	High	3.89053	0	High	4.89359	0	High	3.93667	0	High	4.74047	0	0
	CPEALFQPSFLGMESCGIHETTFNSIMK	4	19	3	B4DW52;V9HVZ7;Q53G99	C1(Carbamidomethyl); M13(Oxidation); C16(Carbamidomethyl); N24(Deamidated); M27(Oxidation)	3264.45	0	0.001289	High	3.81553	0				High	2.50703	0				0
	QEYDESGPSIVHR	23	22	6	Q9BYX7;P0CG38;B4DW52;V9HVZ7;Q53G99;L0R5C4		1516.7	0	9.456e-06	High	3.70989	0	High	4.11519	0	High	3.63909	0	High	4.45321	0	0
	SYELPDGQVITIGNER	201	40	7	Q562R1;Q9BYX7;P68133;B4DUI8;B4DW52;V9HVZ7;Q53G99		1790.89	0	0.0006453	High	3.69497	0	High	4.36043	0	High	3.65867	0	High	4.58082	0	0
	LCYVALDFEQEMATAASSSSLEK	17	20	3	B4DW52;V9HVZ7;Q53G99	C2(Carbamidomethyl); Q10(Deamidated)	2551.18	0	3.374e-05	High	3.52483	0	High	5.273	0	High	3.71318	0	High	4.63014	0	0
	EKLCYVALDFEQEMATAASSSSLEK	5	20	3	B4DW52;V9HVZ7;Q53G99	C4(Carbamidomethyl)	2807.32	0	1.754e-06	High	3.50515	0	High	4.01751	0	High	3.73134	0	High	5.74342	0	1
	QEYDESGPSIVHR	8	22	6	Q9BYX7;P0CG38;B4DW52;V9HVZ7;Q53G99;L0R5C4	Q1(Deamidated)	1517.69	0	3.843e-05	High	3.37417	0	High	3.81006	0	High	3.168	0	High	3.92199	0	0
	CDVDIRKDLYANTVLSGGTTMYPGIADR	5	20	3	B4DW52;V9HVZ7;Q53G99	C1(Carbamidomethyl)	3101.5	0	3.848e-05	High	3.26749	0	High	4.94407	0	High	4.25646	0	High	5.605	0	2
	EKLCYVALDFEQEMATAASSSSLEK	3	20	3	B4DW52;V9HVZ7;Q53G99	C4(Carbamidomethyl); M14(Oxidation)	2823.31	0	5.977e-07	High	3.18146	0				High	4.74977	0	High	5.09491	0	1
	SYELPDGQVITIGNER	10	40	7	Q562R1;Q9BYX7;P68133;B4DUI8;B4DW52;V9HVZ7;Q53G99	Q8(Deamidated); N14(Deamidated)	1792.86	0	0.0001875	High	3.05595	0	High	4.94249	0	High	3.55466	0	High	4.757	0	0
	CPEALFQPSFLGMESCGIHETTFNSIMK	5	19	3	B4DW52;V9HVZ7;Q53G99	C1(Carbamidomethyl); M13(Oxidation); C16(Carbamidomethyl); M27(Oxidation)	3263.45	0	0.003959	High	3.05232	0				High	2.89747	0	High	3.53282	0	0
	CPEALFQPSFLGMESCGIHETTFNSIMK	4	19	3	B4DW52;V9HVZ7;Q53G99	C1(Carbamidomethyl); Q7(Deamidated); C16(Carbamidomethyl)	3232.46	0	4.07e-05	High	2.97359	0	High	5.01916	0	High	3.25534	0				0
	ILTERGYSFTTTAER	7	16	3	B4DW52;V9HVZ7;Q53G99		1744.89	0	0.001435	High	2.8767	0	High	3.37614	0	High	2.95559	0	High	3.90075	0	1
	QEYDESGPSIVHRK	18	22	6	Q9BYX7;P0CG38;B4DW52;V9HVZ7;Q53G99;L0R5C4		1644.8	0	0.0004709	High	2.69773	0	High	3.72013	0	High	3.01093	0	High	4.38804	0	1
	GYSFTTTAER	36	16	3	B4DW52;V9HVZ7;Q53G99		1132.53	0	0.01251	High	2.60855	0	High	2.79368	0	High	2.58032	0	High	2.69039	0	0
	LDLAGRDLTDYLMK	37	31	6	Q562R1;P68133;B4DUI8;B4DW52;V9HVZ7;Q53G99	M13(Oxidation)	1639.84	0	0.01495	High	2.56464	0	High	3.10169	0	High	2.95064	0	High	3.51532	0	1
	LDLAGRDLTDYLMK	26	31	6	Q562R1;P68133;B4DUI8;B4DW52;V9HVZ7;Q53G99		1623.84	0	0.000225	High	2.51799	0	High	3.22354	0	High	2.69802	0	High	3.90678	0	1
	CPEALFQPSFLGMESCGIHETTFNSIMK	6	19	3	B4DW52;V9HVZ7;Q53G99	C1(Carbamidomethyl); C16(Carbamidomethyl); M27(Oxidation)	3247.45	0	0.0002759	High	2.32514	0				High	2.17986	0	High	5.63379	0	0
	SYELPDGQVITIGNERFR	5	40	7	Q562R1;Q9BYX7;P68133;B4DUI8;B4DW52;V9HVZ7;Q53G99	N14(Deamidated)	2095.05	0	0.001793	High	2.31578	0				High	2.27835	0	High	3.29428	0	1
	DLYANTVLSGGTTMYPGIADRMQK	3	19	2	B4DW52;V9HVZ7	M22(Oxidation); Q23(Deamidated)	2619.25	0	0.0004125	High	2.0164	0				High	2.91233	0	High	4.9401	0	1
	GYSFTTTAEREIVR	18	16	3	B4DW52;V9HVZ7;Q53G99		1629.82	0	0.001648	High	1.76542	0	High	2.81229	0	High	2.32781	0	High	2.86924	0	1
	DLYANTVLSGGTTMYPGIADRMQK	2	19	2	B4DW52;V9HVZ7	M14(Oxidation); M22(Oxidation); Q23(Deamidated)	2635.24	0	0.0003246				High	5.31483	0				High	4.54996	0	1
	FRCPEALFQPSFLGMESCGIHETTFNSIMK	4	19	3	B4DW52;V9HVZ7;Q53G99	C3(Carbamidomethyl); C18(Carbamidomethyl); M29(Oxidation)	3550.63	0	0.003972				High	5.23997	0							1
	FRCPEALFQPSFLGMESCGIHETTFNSIMK	3	19	3	B4DW52;V9HVZ7;Q53G99	C3(Carbamidomethyl); C18(Carbamidomethyl)	3534.64	0	0.00131				High	5.11663	0							1
	CPEALFQPSFLGMESCGIHETTFNSIMK	4	19	3	B4DW52;V9HVZ7;Q53G99	C1(Carbamidomethyl); C16(Carbamidomethyl)	3231.46	0	1.984e-05				High	4.57656	0				High	5.75561	0	0
	CPEALFQPSFLGMESCGIHETTFNSIMK	1	19	3	B4DW52;V9HVZ7;Q53G99	C1(Carbamidomethyl); Q7(Deamidated); C16(Carbamidomethyl); N24(Deamidated)	3233.46	0	0.002345				High	4.50283	0							0
	LDLAGRDLTDYLMKILTER	1	31	6	Q562R1;P68133;B4DUI8;B4DW52;V9HVZ7;Q53G99		2236.2	0	0.003754				High	3.20336	0							2
	ITALAPSTMK	2	1	1	V9HVZ7		1032.58	0	0.02114				High	2.95149	0				High	2.66742	0	0
	MDSGDGVTHTVPIYEGYALPHAILR	1	1	1	V9HVZ7	M1(Oxidation)	2728.34	0	4.177e-05							High	5.00428	0				0
	CDVDIRKDLYANTVLSGGTTMYPGIADR	4	20	3	B4DW52;V9HVZ7;Q53G99	C1(Carbamidomethyl); M21(Oxidation)	3117.5	0	0.0009736							High	4.49688	0	High	6.00461	0	2
	FRCPEALFQPSFLGMESCGIHETTFNSIMK	1	19	3	B4DW52;V9HVZ7;Q53G99	C3(Carbamidomethyl); Q9(Deamidated); C18(Carbamidomethyl)	3535.64	0	0.004304										High	5.34255	0	1
	CDVDIRKDLYANTVLSGGTTMYPGIADR	1	20	3	B4DW52;V9HVZ7;Q53G99	C1(Carbamidomethyl); N12(Deamidated)	3102.51	0	0.00195										High	4.33604	0	2
	QEYDESGPSIVHRK	1	22	6	Q9BYX7;P0CG38;B4DW52;V9HVZ7;Q53G99;L0R5C4	Q1(Deamidated)	1645.78	0	0.002478										High	2.6851	0	1
	CDVDIRKDLYANTVLSGGTTMYPGIADR	2	20	3	B4DW52;V9HVZ7;Q53G99	C1(Carbamidomethyl); N12(Deamidated); M21(Oxidation)	3118.49	0.001	0.005384	High	3.50763	0				High	2.8859	0				2
	CPEALFQPSFLGMESCGIHETTFNSIMK	6	19	3	B4DW52;V9HVZ7;Q53G99	C1(Carbamidomethyl); M13(Oxidation); C16(Carbamidomethyl); N24(Deamidated)	3248.46	0.001	0.01361	High	2.96117	0	High	4.49554	0	High	2.03459	0				0
	IKIIAPPERK	4	34	6	Q562R1;P68133;B4DUI8;B4DW52;V9HVZ7;Q53G99		1164.75	0.001	0.03352				High	2.43487	0	High	1.88886	0	High	2.73133	0	2
	EKLCYVALDFEQEMATAASSSSLEK	1	20	3	B4DW52;V9HVZ7;Q53G99	C4(Carbamidomethyl); Q12(Deamidated)	2808.3	0.001	0.002169							High	2.48479	0				1
	DLTDYLMK	8	31	6	Q562R1;P68133;B4DUI8;B4DW52;V9HVZ7;Q53G99	M7(Oxidation)	1014.48	0.002	0.03301				High	2.49493	0	High	2.26647	0	High	1.91396	0	0
	EKLCYVALDFEQEMATAASSSSLEK	2	20	3	B4DW52;V9HVZ7;Q53G99	C4(Carbamidomethyl); Q12(Deamidated); M14(Oxidation)	2824.29	0.004	0.02432	High	3.43772	0				High	2.09698	0				1
	DLTDYLMK	8	31	6	Q562R1;P68133;B4DUI8;B4DW52;V9HVZ7;Q53G99		998.486	0.004	0.05801				High	2.39491	0	High	1.85033	0	High	1.54934	0	0
	IKIIAPPER	3	35	6	Q562R1;P68133;B4DUI8;B4DW52;V9HVZ7;Q53G99		1036.65	0.004	0.08078				High	2.37811	0	High	2.09943	0	High	2.85645	0	1
	EIVRDIKEK	1	35	6	P68133;P0CG38;B4DUI8;B4DW52;V9HVZ7;Q53G99		1129.66	0.004	0.05584							High	1.83167	0				2
	CDVDIRK	1	21	4	Q562R1;B4DW52;V9HVZ7;Q53G99	C1(Carbamidomethyl)	905.451	0.009	0.1325							High	1.75704	0				1
P13645	Keratin, type I cytoskeletal 10 OS=Homo sapiens GN=KRT10 PE=1 SV=6 - [K1C10_HUMAN]	575.397	53.25	32	260	131.239	28.94	16	41	279.271	49.66	29	128	232.933	47.26	24	74	584	58.7917	5.21143
	Sequence	# PSMs	# Proteins	# Protein Groups	Protein Group Accessions	Modifications	MH+ [Da]	q-Value	PEP	A2	XCorr A2	Probability A2	B2	XCorr B2	Probability B2	C2	XCorr C2	Probability C2	D2	XCorr D2	Probability D2	# Missed Cleavages
	NVSTGDVNVEMNAAPGVDLTQLLNNMR	30	2	1	P13645	N1(Deamidated); M26(Oxidation)	2889.37	0	0.001407	High	5.14519	0				High	2.99789	0	High	5.19595	0	0
	NVSTGDVNVEMNAAPGVDLTQLLNNMR	36	2	1	P13645	M11(Oxidation); Q21(Deamidated); M26(Oxidation)	2905.38	0	1.047e-05	High	4.74969	0	High	3.03877	0	High	3.67348	0	High	5.26653	0	0
	SKELTTEIDNNIEQISSYK	34	2	1	P13645	Q14(Deamidated)	2213.08	0	3.942e-05	High	4.70014	0	High	4.24903	0	High	3.99986	0				1
	GSSGGGCFGGSSGGYGGLGGFGGGSFR	5	1	1	P13645	C7(Carbamidomethyl)	2342.99	0	6.951e-05	High	4.69053	0				High	3.49366	0	High	6.05812	0	0
	GSLGGGFSSGGFSGGSFSR	18	2	1	P13645		1707.77	0	1.004e-07	High	4.66812	0	High	5.31402	0	High	4.24077	0	High	5.38623	0	0
	SGGGGGGGGCGGGGGVSSLR	2	2	1	P13645	C10(Carbamidomethyl)	1549.68	0	1.491e-12	High	4.65172	0				High	4.41296	0				0
	NVSTGDVNVEMNAAPGVDLTQLLNNMR	25	2	1	P13645	M26(Oxidation)	2888.39	0	1.445e-07	High	4.58044	0	High	6.0466	0	High	4.27179	0	High	6.21493	0	0
	NVSTGDVNVEMNAAPGVDLTQLLNNMR	25	2	1	P13645	M11(Oxidation); M26(Oxidation)	2904.38	0	3.647e-07	High	4.541	0	High	5.541	0	High	3.4756	0	High	5.66744	0	0
	SKELTTEIDNNIEQISSYK	18	2	1	P13645		2212.1	0	3.768e-06	High	4.43753	0	High	3.96549	0	High	4.22441	0	High	4.96955	0	1
	NVSTGDVNVEMNAAPGVDLTQLLNNMR	6	2	1	P13645		2872.39	0	3.848e-07	High	4.23028	0	High	5.41563	0	High	4.02808	0	High	6.07324	0	0
	NQILNLTTDNANILLQIDNAR	1	2	1	P13645		2367.26	0	0.0002607	High	3.96652	0										0
	SKELTTEIDNNIEQISSYKSEITELR	3	2	1	P13645	N10(Deamidated)	3041.52	0	6.276e-06	High	3.93525	0										2
	KNHEEEMKDLR	2	2	1	P13645		1428.69	0	0.0002023	High	3.77059	0				High	2.16297	0				2
	ELTTEIDNNIEQISSYK	14	2	1	P13645		1996.97	0	5.868e-06	High	3.73894	0	High	4.05939	0	High	3.59922	0	High	4.41435	0	0
	AETECQNTEYQQLLDIK	4	2	1	P13645	C5(Carbamidomethyl)	2082.97	0	3.353e-09	High	3.68751	0				High	3.62361	0				0
	NVSTGDVNVEMNAAPGVDLTQLLNNMR	15	2	1	P13645	N8(Deamidated); M11(Oxidation); N25(Deamidated); M26(Oxidation)	2906.37	0	0.001807	High	3.409	0	High	5.09856	0	High	2.58591	0				0
	ELTTEIDNNIEQISSYK	9	2	1	P13645	N8(Deamidated)	1997.96	0	6.192e-08	High	3.3953	0				High	3.67777	0				0
	QSLEASLAETEGR	10	2	1	P13645		1390.68	0	7.042e-06	High	3.37887	0	High	3.55594	0	High	3.58574	0	High	4.26357	0	0
	AETECQNTEYQQLLDIK	13	2	1	P13645	C5(Carbamidomethyl); N7(Deamidated)	2083.95	0	0.001025	High	3.34516	0				High	2.04229	0	High	3.4551	0	0
	SQYEQLAEQNRK	22	2	1	P13645	Q5(Deamidated)	1494.72	0	0.00143	High	3.30469	0				High	2.81721	0	High	3.41752	0	1
	ALEESNYELEGK	4	2	1	P13645	N6(Deamidated)	1382.63	0	0.0007593	High	3.22297	0				High	2.38389	0				0
	NVSTGDVNVEMNAAPGVDLTQLLNNMR	6	2	1	P13645	N12(Deamidated)	2873.39	0	7.002e-05	High	3.21703	0				High	3.42241	0	High	3.72419	0	0
	ALEESNYELEGK	5	2	1	P13645		1381.65	0	0.0002096	High	3.21554	0				High	2.25879	0	High	4.11056	0	0
	NVQALEIELQSQLALK	4	2	1	P13645		1797.01	0	1.035e-06	High	3.08652	0				High	3.26617	0	High	4.75498	0	0
	QSVEADINGLRR	14	10	2	P13645;A1A4E9	N8(Deamidated)	1358.7	0	0.0003391	High	3.08507	0	High	2.95608	0	High	2.80248	0	High	3.42973	0	1
	NHEEEMKDLR	1	2	1	P13645	N1(Deamidated)	1301.58	0	0.001345	High	3.08431	0										1
	LKYENEVALR	5	2	1	P13645	N5(Deamidated)	1235.66	0	0.0006289	High	3.052	0				High	3.32884	0	High	2.44319	0	1
	QSLEASLAETEGR	1	2	1	P13645	Q1(Deamidated)	1391.67	0	6.559e-06	High	3.02803	0										0
	IRLENEIQTYR	8	2	1	P13645		1434.77	0	0.001568	High	2.97146	0				High	3.17964	0	High	3.46052	0	1
	KDAEAWFNEK	3	3	1	P13645		1237.59	0	0.001223	High	2.82691	0				High	3.216	0				1
	LENEIQTYR	5	2	1	P13645		1165.58	0	0.006361	High	2.74435	0				High	2.77839	0	High	2.92531	0	0
	SQYEQLAEQNR	3	2	1	P13645	Q2(Deamidated)	1366.62	0	0.000223	High	2.71251	0				High	1.72392	0				0
	LENEIQTYR	2	2	1	P13645	N3(Deamidated)	1166.57	0	0.001566	High	2.70843	0										0
	SQYEQLAEQNR	6	2	1	P13645		1365.64	0	0.0001321	High	2.64952	0	High	3.10687	0	High	2.89891	0	High	3.35213	0	0
	SQYEQLAEQNRK	10	2	1	P13645		1493.74	0	0.0003475	High	2.64612	0	High	3.36867	0	High	2.48877	0	High	3.26793	0	1
	QSVEADINGLRR	9	10	2	P13645;A1A4E9		1357.72	0	0.005772	High	2.63567	0	High	3.43901	0	High	2.69159	0	High	2.68909	0	1
	SQYEQLAEQNRK	4	2	1	P13645	Q2(Deamidated); Q5(Deamidated)	1495.7	0	0.001965	High	2.60304	0										1
	NHEEEMKDLR	4	2	1	P13645		1300.6	0	0.001168	High	2.57469	0				High	2.46436	0				1
	SLLEGEGSSGGGGR	6	2	1	P13645		1262.6	0	0.0003056	High	2.51993	0	High	3.15952	0	High	2.70652	0	High	3.41023	0	0
	NVQALEIELQSQLALK	2	2	1	P13645	Q3(Deamidated)	1798	0	0.001781	High	2.43523	0										0
	VTMQNLNDRLASYLDK	2	4	3	P13645;P02533;P08779	M3(Oxidation); N7(Deamidated)	1897.93	0	0.00139	High	2.22257	0										1
	VTMQNLNDR	4	7	3	P13645;P02533;P08779		1090.53	0	0.02227	High	1.93514	0	High	2.52585	0	High	2.04457	0	High	2.32256	0	0
	QSVEADINGLR	3	11	2	P13645;A1A4E9		1201.62	0	0.00152				High	3.17133	0	High	2.66693	0	High	3.27443	0	0
	SKELTTEIDNNIEQISSYK	3	2	1	P13645	N10(Deamidated); N11(Deamidated)	2214.09	0	0.0002499							High	3.4755	0				1
	SSSSGSVGESSSKGPR	1	2	1	P13645		1495.7	0	7.649e-05										High	2.65985	0	1
	VTMQNLNDRLASYLDK	1	4	3	P13645;P02533;P08779	M3(Oxidation)	1896.95	0.001	0.004768	High	3.28632	0										1
	NHEEEMKDLR	9	2	1	P13645	M6(Oxidation)	1316.59	0.001	0.005169	High	2.89369	0				High	2.06104	0	High	2.70377	0	1
	DAEAWFNEK	6	5	1	P13645	N7(Deamidated)	1110.47	0.001	0.002721	High	2.74937	0				High	2.55778	0	High	2.29541	0	0
	LKYENEVALR	8	2	1	P13645		1234.68	0.001	0.008159	High	2.63805	0	High	2.29254	0	High	2.49471	0	High	3.10813	0	1
	QSVEADINGLR	2	11	2	P13645;A1A4E9	N8(Deamidated)	1202.6	0.001	0.006019	High	2.62404	0				High	2.47423	0				0
	DAEAWFNEK	14	5	1	P13645		1109.49	0.001	0.006325	High	2.55682	0	High	2.22498	0	High	2.46579	0	High	2.00892	0	0
	VTMQNLNDR	4	7	3	P13645;P02533;P08779	N7(Deamidated)	1091.52	0.001	0.002767	High	2.46488	0				High	2.26832	0				0
	QSVEADINGLRR	2	10	2	P13645;A1A4E9	Q1(Deamidated); N8(Deamidated)	1359.69	0.001	0.002922	High	2.264	0										1
	LAADDFR	9	30	6	P13645;P02533;P08779;Q04695;P05783;P08727		807.399	0.001	0.01008	High	2.01671	0	High	2.01047	0	High	2.28151	0	High	1.89794	0	0
	VTMQNLNDR	4	7	3	P13645;P02533;P08779	M3(Oxidation)	1106.53	0.001	0.006089	High	1.89192	0				High	1.89237	0				0
	YENEVALR	1	2	1	P13645		993.5	0.001	0.008322							High	1.87854	0				0
	NVSTGDVNVEMNAAPGVDLTQLLNNMR	2	2	1	P13645	N1(Deamidated); M11(Oxidation); N25(Deamidated)	2890.38	0.001	0.009416										High	4.104	0	0
	IRLENEIQTYR	3	2	1	P13645	Q8(Deamidated)	1435.75	0.002	0.008539	High	2.96466	0										1
	VLDELTLTK	15	3	1	P13645		1031.6	0.002	0.01285	High	2.44883	0	High	2.8126	0	High	1.84429	0	High	2.57083	0	0
	LASYLDKVR	3	14	5	P13645;P02533;P08779;Q04695;P08727		1064.61	0.002	0.02026	High	2.40831	0	High	2.64479	0	High	1.99239	0				1
	RVLDELTLTK	2	3	1	P13645		1187.7	0.003	0.01909	High	2.13176	0				High	1.71528	0				1
	VTMQNLNDR	4	7	3	P13645;P02533;P08779	M3(Oxidation); N5(Deamidated)	1107.51	0.003	0.01845	High	1.95028	0										0
	LASYLDK	1	15	6	P13645;P35527;P02533;P08779;Q04695;P08727		809.44	0.006	0.107										High	2.05086	0	0
	DAEAWFNEKSK	1	2	1	P13645	N7(Deamidated)	1325.6	0.007	0.05534	High	1.86308	0										1
	IKEWYEK	1	2	1	P13645		995.52	0.007	0.09829							High	1.83992	0				1
	NVSTGDVNVEMNAAPGVDLTQLLNNMR	3	2	1	P13645	N8(Deamidated); N25(Deamidated)	2874.38	0.008	0.1099							High	2.11722	0				0
	SEITELR	1	2	1	P13645		847.452	0.009	0.0729	High	1.47781	0										0
E7EVS6	Actin, cytoplasmic 1 (Fragment) OS=Homo sapiens GN=ACTB PE=1 SV=4 - [E7EVS6_HUMAN]	535.011	54.6	10	222	943.03	75.46	13	277	749.267	57.67	12	320	1101.2	75.46	13	343	163	17.8668	5.50342
	Sequence	# PSMs	# Proteins	# Protein Groups	Protein Group Accessions	Modifications	MH+ [Da]	q-Value	PEP	A2	XCorr A2	Probability A2	B2	XCorr B2	Probability B2	C2	XCorr C2	Probability C2	D2	XCorr D2	Probability D2	# Missed Cleavages
	HQGVMVGMGQKDSYVGDEAQSKR	33	36	3	P68133;Q53G99;E7EVS6	M5(Oxidation); Q10(Deamidated)	2524.16	0	4.625e-08	High	5.1283	0	High	4.90407	0	High	5.41769	0	High	5.70317	0	2
	HQGVMVGMGQKDSYVGDEAQSKR	26	36	3	P68133;Q53G99;E7EVS6	M5(Oxidation); M8(Oxidation)	2539.17	0	3.151e-08	High	4.73824	0	High	4.27711	0	High	4.04097	0	High	6.67189	0	2
	HQGVMVGMGQKDSYVGDEAQSKR	45	36	3	P68133;Q53G99;E7EVS6	M8(Oxidation)	2523.17	0	2.319e-08	High	4.6854	0	High	4.86585	0	High	5.11233	0	High	6.4165	0	2
	HQGVMVGMGQKDSYVGDEAQSKR	16	36	3	P68133;Q53G99;E7EVS6		2507.17	0	3.059e-09	High	4.61868	0	High	5.85761	0	High	5.69678	0	High	7.27916	0	2
	HQGVMVGMGQKDSYVGDEAQSKR	23	36	3	P68133;Q53G99;E7EVS6	M5(Oxidation); M8(Oxidation); Q10(Deamidated)	2540.15	0	3.546e-07	High	4.53194	0	High	4.21916	0	High	4.53324	0	High	5.67533	0	2
	HQGVMVGMGQKDSYVGDEAQSK	42	36	3	P68133;Q53G99;E7EVS6	M8(Oxidation)	2367.07	0	2.833e-06	High	4.36113	0	High	6.02709	0	High	4.15251	0	High	6.01417	0	1
	HQGVMVGMGQKDSYVGDEAQSK	12	36	3	P68133;Q53G99;E7EVS6	Q10(Deamidated)	2352.06	0	1.515e-08	High	4.26798	0	High	5.59481	0	High	5.01862	0	High	6.33728	0	1
	HQGVMVGMGQKDSYVGDEAQSK	33	36	3	P68133;Q53G99;E7EVS6	M8(Oxidation); Q10(Deamidated)	2368.06	0	2.417e-06	High	4.18358	0	High	5.28913	0	High	4.4582	0	High	5.95198	0	1
	VAPEEHPVLLTEAPLNPK	301	29	5	B4DW52;Q53G99;E7EVS6;Q562Z4;Q562L9		1954.07	0	1.575e-06	High	4.09127	0	High	5.18816	0	High	3.77656	0	High	5.11746	0	0
	HQGVMVGMGQKDSYVGDEAQSKR	3	36	3	P68133;Q53G99;E7EVS6	Q2(Deamidated); M5(Oxidation); Q10(Deamidated)	2525.14	0	2.642e-05	High	4.02596	0							High	6.08721	0	2
	HQGVMVGMGQKDSYVGDEAQSK	37	36	3	P68133;Q53G99;E7EVS6	M5(Oxidation); M8(Oxidation)	2383.06	0	4.998e-06	High	3.98858	0	High	5.71112	0	High	4.39968	0	High	5.46798	0	1
	HQGVMVGMGQKDSYVGDEAQSK	16	36	3	P68133;Q53G99;E7EVS6	Q2(Deamidated); M5(Oxidation); M8(Oxidation)	2384.06	0	0.0001159	High	3.82536	0	High	5.06506	0	High	3.0325	0	High	5.36605	0	1
	YPIEHGIVTNWDDMEK	3	19	2	Q53G99;E7EVS6		1946.9	0	1.332e-06	High	3.78346	0				High	3.14378	0	High	4.50324	0	0
	HQGVMVGMGQKDSYVGDEAQSK	15	36	3	P68133;Q53G99;E7EVS6		2351.08	0	5.975e-05	High	3.75407	0	High	5.76996	0	High	4.32654	0	High	5.47726	0	1
	VAPEEHPVLLTEAPLNPK	10	29	5	B4DW52;Q53G99;E7EVS6;Q562L9;Q562Z4	N16(Deamidated)	1955.05	0	3.837e-08	High	3.69461	0	High	4.73338	0	High	3.2215	0	High	4.91855	0	0
	IWHHTFYNELR	11	67	10	Q9BYX7;P68133;P0CG38;B4DW52;Q53G99;E7EVS6;L0R5C4;Q562M3;Q562W2;Q562U0		1515.75	0	0.001517	High	3.06769	0	High	3.62082	0	High	1.87793	0	High	2.58829	0	0
	HQGVMVGMGQK	83	38	4	Q562R1;P68133;Q53G99;E7EVS6	M5(Oxidation); M8(Oxidation)	1203.56	0	0.01544	High	2.90849	0	High	3.07082	0	High	2.59864	0	High	2.85045	0	0
	AVFPSIVGRPR	175	44	5	P68133;P0CG38;B4DW52;Q53G99;E7EVS6		1198.71	0	0.002069	High	2.90617	0	High	3.41803	0	High	2.61863	0	High	2.9895	0	0
	HQGVMVGMGQK	8	38	4	Q562R1;P68133;Q53G99;E7EVS6	Q10(Deamidated)	1172.56	0	6.886e-05	High	2.87227	0	High	3.93724	0	High	2.807	0	High	4.05806	0	0
	HQGVMVGMGQK	70	38	4	Q562R1;P68133;Q53G99;E7EVS6	M5(Oxidation)	1187.57	0	0.01142	High	2.85527	0	High	3.40253	0	High	2.8711	0	High	3.35089	0	0
	AGFAGDDAPR	39	46	6	P68133;P0CG38;B4DW52;Q53G99;E7EVS6;L0R5C4		976.45	0	0.002165	High	2.82474	0	High	3.07533	0	High	2.78709	0	High	3.28298	0	0
	HQGVMVGMGQK	24	38	4	Q562R1;P68133;Q53G99;E7EVS6		1171.57	0	0.0001699	High	2.71339	0	High	3.90103	0	High	3.06248	0	High	3.79448	0	0
	HQGVMVGMGQK	4	38	4	Q562R1;P68133;Q53G99;E7EVS6	Q2(Deamidated); Q10(Deamidated)	1173.54	0	0.000128	High	2.62673	0	High	4.02216	0	High	2.80104	0	High	4.06698	0	0
	DSYVGDEAQSK	13	37	4	P68133;B4DUI8;Q53G99;E7EVS6		1198.52	0	0.02167	High	2.58193	0	High	2.77143	0	High	2.40651	0	High	2.84557	0	0
	DSYVGDEAQSKR	59	37	4	P68133;B4DUI8;Q53G99;E7EVS6		1354.62	0	0.007687	High	2.54018	0	High	3.70746	0	High	2.80167	0	High	3.2065	0	1
	DSYVGDEAQSK	4	37	4	P68133;B4DUI8;Q53G99;E7EVS6	Q9(Deamidated)	1199.51	0	0.005115	High	2.45953	0	High	3.00255	0	High	2.12723	0	High	3.05841	0	0
	DSYVGDEAQSKR	15	37	4	P68133;B4DUI8;Q53G99;E7EVS6	Q9(Deamidated)	1355.61	0	0.01791	High	2.44698	0	High	3.86373	0	High	2.60612	0	High	3.26181	0	1
	MTQIMFETFNTPAMYVAIQAVLSLYASGR	2	29	6	B4DW52;Q53G99;E7EVS6;Q562M3;Q562Z4;Q562L9	M5(Oxidation); Q19(Deamidated)	3270.61	0	0.0003908				High	6.79079	0							0
	MTQIMFETFNTPAMYVAIQAVLSLYASGR	1	29	6	B4DW52;Q53G99;E7EVS6;Q562M3;Q562Z4;Q562L9		3253.61	0	3.946e-05				High	6.52669	0							0
	HQGVMVGMGQKDSYVGDEAQSKR	17	36	3	P68133;Q53G99;E7EVS6	Q10(Deamidated)	2508.16	0	5.861e-09				High	5.63725	0	High	5.20272	0	High	6.35843	0	2
	VAPEEHPVLLTEAPLNPKANR	3	27	5	B4DW52;Q53G99;E7EVS6;Q562Z4;Q562L9		2295.25	0	0.0001416				High	4.69413	0				High	3.57703	0	1
	HQGVMVGMGQKDSYVGDEAQSKR	3	36	3	P68133;Q53G99;E7EVS6	Q2(Deamidated); Q10(Deamidated)	2509.14	0	3.002e-09				High	3.35912	0	High	3.45781	0	High	6.41366	0	2
	HQGVMVGMGQKDSYVGDEAQSKR	2	36	3	P68133;Q53G99;E7EVS6	M5(Oxidation); M8(Oxidation); Q10(Deamidated); Q20(Deamidated)	2541.14	0	3.046e-07							High	5.76153	0	High	4.66154	0	2
	VAPEEHPVLLTEAPLNPKANR	1	27	5	B4DW52;Q53G99;E7EVS6;Q562Z4;Q562L9	N20(Deamidated)	2296.23	0	0.0006282							High	3.22906	0				1
	VAPEEHPVLLTEAPLNPKANREK	3	24	5	B4DW52;Q53G99;E7EVS6;Q562L9;Q562Z4		2552.38	0	0.0008506							High	1.97313	0	High	4.89195	0	2
	HQGVMVGMGQKDSYVGDEAQSK	2	36	3	P68133;Q53G99;E7EVS6	Q2(Deamidated); Q10(Deamidated)	2353.04	0	0.001579							High	1.77996	0	High	3.75648	0	1
	MTQIMFETFNTPAMYVAIQAVLSLYASGR	2	28	5	B4DW52;Q53G99;E7EVS6;Q562M3;Q562L9	Q3(Deamidated)	3254.62	0	0.0001647										High	5.59637	0	0
	TTGIVMDSGDGVTHTV	1	1	1	E7EVS6		1589.75	0.001	0.03467				High	4.30896	0							0
	HQGVMVGMGQK	4	38	4	Q562R1;P68133;Q53G99;E7EVS6	Q2(Deamidated); M5(Oxidation)	1188.55	0.001	0.008599							High	3.18076	0	High	3.45201	0	0
	EKMTQIMFETFNTPAMYVAIQAVLSLYASGR	1	28	6	B4DW52;Q53G99;E7EVS6;Q562M3;Q562Z4;Q562L9	M3(Oxidation); M7(Oxidation); N12(Deamidated); M16(Oxidation)	3559.73	0.007	0.1668				High	3.11594	0							1
P35527	Keratin, type I cytoskeletal 9 OS=Homo sapiens GN=KRT9 PE=1 SV=3 - [K1C9_HUMAN]	517.296	85.71	35	218	169.152	42.05	15	45	173.742	52.65	24	70	142.568	57.62	21	39	623	62.0268	5.23682
	Sequence	# PSMs	# Proteins	# Protein Groups	Protein Group Accessions	Modifications	MH+ [Da]	q-Value	PEP	A2	XCorr A2	Probability A2	B2	XCorr B2	Probability B2	C2	XCorr C2	Probability C2	D2	XCorr D2	Probability D2	# Missed Cleavages
	KDIENQYETQITQIEHEVSSSGQEVQSSAK	5	3	1	P35527		3392.61	0	1.462e-10	High	5.81136	0				High	3.88129	0	High	5.37332	0	1
	GGSGGSHGGGSGFGGESGGSYGGGEEASGSGGGYGGGSGK	22	3	1	P35527		3223.29	0	8.689e-12	High	5.79858	0	High	6.95664	0	High	5.96702	0	High	7.78483	0	0
	GGGGSFGYSYGGGSGGGFSASSLGGGFGGGSR	23	2	1	P35527		2705.16	0	7.447e-08	High	5.75244	0	High	5.71407	0	High	4.67163	0	High	7.11686	0	0
	GGSGGSYGGGSGSGGGSGGGYGGGSGGGHSGGSGGGHSGGSGGNYGGGSGSGGGSGGGYGGGSGSR	2	3	1	P35527	N44(Deamidated)	4973.94	0	6.844e-10	High	5.58948	0										0
	GGSGGSYGGGGSGGGYGGGSGSR	15	3	1	P35527		1791.73	0	1.62e-07	High	5.55915	0	High	6.21406	0	High	4.91922	0	High	3.67464	0	0
	GFGGASGGGYSSSGGFGGGFGGGSGGGFGGGYGSGFGGFGGFGGGAGGGDGGILTANEK	2	1	1	P35527		4862.08	0	2.411e-07	High	5.45458	0							High	7.71929	0	0
	LASYLDKVQALEEANNDLENK	7	2	1	P35527		2377.19	0	2.198e-05	High	5.24278	0	High	3.78783	0	High	4.09881	0	High	6.48478	0	1
	DIENQYETQITQIEHEVSSSGQEVQSSAK	15	3	1	P35527		3264.52	0	4.64e-06	High	4.68575	0	High	5.94662	0	High	3.93324	0	High	5.24882	0	0
	KDIENQYETQITQIEHEVSSSGQEVQSSAK	12	3	1	P35527	Q26(Deamidated)	3393.6	0	0.001379	High	4.6618	0										1
	EIETYHNLLEGGQEDFESSGAGK	18	3	1	P35527		2510.13	0	2.283e-08	High	4.58936	0	High	5.40863	0	High	3.99495	0	High	5.91884	0	0
	DIENQYETQITQIEHEVSSSGQEVQSSAK	35	3	1	P35527	Q22(Deamidated)	3265.51	0	6.965e-05	High	4.53462	0	High	4.78211	0	High	4.32889	0	High	5.64641	0	0
	LEKEIETYHNLLEGGQEDFESSGAGK	4	3	1	P35527		2880.36	0	5.146e-09	High	4.52928	0				High	2.78861	0				1
	SGGGGGGGLGSGGSIR	7	2	1	P35527		1232.6	0	2.018e-05	High	4.31969	0	High	4.81951	0	High	3.62328	0	High	4.62634	0	0
	NRKDIENQYETQITQIEHEVSSSGQEVQSSAK	2	3	1	P35527	N1(Deamidated)	3663.74	0	0.001491	High	4.31924	0										2
	EIETYHNLLEGGQEDFESSGAGK	9	3	1	P35527	N7(Deamidated)	2511.12	0	9.127e-07	High	4.21984	0				High	3.80825	0	High	3.63271	0	0
	LASYLDKVQALEEANNDLENK	3	2	1	P35527	N15(Deamidated)	2378.18	0	2.008e-06	High	3.95231	0				High	2.21174	0				1
	DIENQYETQITQIEHEVSSSGQEVQSSAK	6	3	1	P35527	Q12(Deamidated); Q22(Deamidated); Q25(Deamidated)	3267.5	0	0.001042	High	3.80675	0				High	4.62238	0				0
	NHKEEMSQLTGQNSGDVNVEINVAPGKDLTK	2	3	1	P35527	M6(Oxidation)	3368.64	0	2.589e-05	High	3.65352	0				High	3.29055	0				2
	VQALEEANNDLENK	3	2	1	P35527		1586.76	0	9.188e-05	High	3.60471	0				High	3.12698	0				0
	DIENQYETQITQIEHEVSSSGQEVQSSAK	8	3	1	P35527	Q12(Deamidated); Q22(Deamidated)	3266.49	0	0.0006334	High	3.51873	0										0
	SDLEMQYETLQEELMALKK	2	3	1	P35527	M5(Oxidation)	2315.12	0	0.001554	High	3.49423	0										1
	EIETYHNLLEGGQEDFESSGAGK	1	3	1	P35527	N7(Deamidated); Q13(Deamidated)	2512.1	0	4.722e-05	High	3.39082	0										0
	NHKEEMSQLTGQNSGDVNVEINVAPGK	2	3	1	P35527	M6(Oxidation)	2911.38	0	6.997e-05	High	3.29664	0				High	2.83163	0				1
	QGVDADINGLR	6	3	1	P35527	N8(Deamidated)	1158.57	0	0.001493	High	3.19381	0	High	3.76639	0	High	2.84384	0				0
	SDLEMQYETLQEELMALKK	1	3	1	P35527	M5(Oxidation); M15(Oxidation)	2331.11	0	0.0002181	High	3.16137	0										1
	QGVDADINGLR	5	3	1	P35527		1157.59	0	0.002549	High	3.08779	0	High	3.59053	0	High	3.08328	0	High	3.52377	0	0
	QEIECQNQEYSLLLSIK	2	3	1	P35527	C5(Carbamidomethyl)	2095.04	0	3.792e-05	High	3.05254	0										0
	TLLDIDNTR	4	2	1	P35527	N7(Deamidated)	1061.55	0	0.001093	High	2.96205	0							High	2.05207	0	0
	GSRGGSGGSYGGGGSGGGYGGGSGSR	1	3	1	P35527		2091.88	0	5.828e-05	High	2.90711	0										1
	HGVQELEIELQSQLSK	4	3	1	P35527		1837.97	0	0.000831	High	2.85847	0				High	2.92666	0	High	3.58946	0	0
	QGVDADINGLR	2	3	1	P35527	Q1(Deamidated); N8(Deamidated)	1159.56	0	0.0007601	High	2.68189	0										0
	SDLEMQYETLQEELMALK	2	3	1	P35527	M5(Oxidation)	2187.03	0	0.0006614	High	2.6784	0										0
	SDLEMQYETLQEELMALKK	1	3	1	P35527		2299.12	0	0.001454	High	2.50249	0										1
	IKFEMEQNLR	6	3	1	P35527		1307.68	0	0.001118	High	2.43841	0	High	3.07341	0	High	2.70826	0	High	2.7921	0	1
	TLLDIDNTR	16	2	1	P35527		1060.56	0	0.01431	High	2.3267	0	High	2.55887	0	High	2.26202	0	High	2.50494	0	0
	FSSSSGYGGGSSR	6	2	1	P35527		1235.53	0	0.001069	High	2.26323	0	High	3.08334	0	High	2.58573	0	High	2.62777	0	0
	EEMSQLTGQNSGDVNVEINVAPGKDLTK	1	3	1	P35527	M3(Oxidation)	2989.44	0	0.0005982	High	2.01694	0										1
	NYSPYYNTIDDLKDQIVDLTVGNNK	2	2	1	P35527		2902.42	0.001	0.004194	High	3.89326	0										1
	NYSPYYNTIDDLK	1	2	1	P35527		1605.74	0.001	0.002696	High	2.8431	0										0
	TLNDMRQEYEQLIAK	2	3	1	P35527		1851.93	0.001	0.0129	High	2.69908	0				High	2.21141	0				1
	LEKEIETYHNLLEGGQEDFESSGAGK	2	3	1	P35527	N10(Deamidated)	2881.37	0.001	0.002813	High	2.47944	0				High	3.85649	0				1
	IKFEMEQNLR	6	3	1	P35527	M5(Oxidation); Q7(Deamidated)	1324.66	0.001	0.006685	High	2.45481	0										1
	IQDWYDKKGPAAIQK	1	2	1	P35527		1760.93	0.001	0.005986	High	2.38138	0										2
	QVLDNLTMEK	8	3	1	P35527	M8(Oxidation)	1206.6	0.001	0.01755	High	2.35579	0	High	2.8722	0	High	2.13737	0	High	3.05487	0	0
	STMQELNSR	20	2	1	P35527	M3(Oxidation)	1081.49	0.001	0.02912	High	2.20603	0	High	2.39021	0	High	1.83374	0	High	2.43076	0	0
	STMQELNSR	2	2	1	P35527	N7(Deamidated)	1066.48	0.001	0.007554	High	2.09274	0										0
	QFSSSYLSR	4	2	1	P35527		1074.52	0.001	0.01798	High	1.94039	0	High	2.09334	0	High	1.55499	0	High	2.53376	0	0
	QVLDNLTMEK	2	3	1	P35527		1190.61	0.001	0.01145	High	1.72372	0				High	2.05319	0				0
	FSSSGGGGGGGRFSSSSGYGGGSSR	1	1	1	P35527		2198.95	0.001	0.01425										High	1.53591	0	1
	TLNDMRQEYEQLIAK	2	3	1	P35527	M5(Oxidation)	1867.92	0.002	0.009719	High	2.40159	0										1
	STMQELNSR	2	2	1	P35527		1065.5	0.002	0.05166	High	2.22682	0	High	2.25604	0							0
	MTLDDFR	25	3	1	P35527	M1(Oxidation)	913.409	0.002	0.03495	High	2.07092	0	High	2.15612	0	High	1.47083	0	High	2.03418	0	0
	FEMEQNLR	2	3	1	P35527		1066.5	0.002	0.01346	High	2.02488	0				High	1.69498	0				0
	MTLDDFR	13	3	1	P35527		897.413	0.002	0.02527	High	1.94102	0	High	2.09547	0	High	1.59166	0	High	1.78821	0	0
	QFSSSYLSR	1	2	1	P35527	Q1(Deamidated)	1075.51	0.002	0.01001	High	1.71494	0										0
	QEYEQLIAK	2	3	1	P35527		1121.58	0.002	0.02848							High	2.01591	0	High	3.20467	0	0
	KDIENQYETQITQIEHEVSSSGQEVQSSAK	3	3	1	P35527	N5(Deamidated); Q23(Deamidated)	3394.59	0.003	0.01966	High	3.0717	0										1
	NYSPYYNTIDDLKDQIVDLTVGNNK	2	2	1	P35527	N23(Deamidated)	2903.42	0.003	0.01786	High	2.91295	0										1
	IKFEMEQNLR	3	3	1	P35527	M5(Oxidation)	1323.67	0.003	0.01743	High	2.17401	0				High	1.99463	0				1
	FEMEQNLR	1	3	1	P35527	M3(Oxidation)	1082.49	0.003	0.01895	High	1.81518	0										0
	LASYLDK	1	15	6	P13645;P35527;P02533;P08779;Q04695;P08727		809.44	0.006	0.107										High	2.05086	0	0
	QEYEQLIAK	1	3	1	P35527	Q5(Deamidated)	1122.57	0.007	0.04709	High	2.50515	0										0
	TLNDMRQEYEQLIAK	1	3	1	P35527	M5(Oxidation); Q11(Deamidated)	1868.91	0.007	0.04847	High	1.69294	0										1
B4DUI8	cDNA FLJ52761, highly similar to Actin, aortic smooth muscle OS=Homo sapiens PE=2 SV=1 - [B4DUI8_HUMAN]	487.389	34.94	12	199	842.718	43.37	16	263	691.16	40.06	15	299	736.797	49.1	19	237	332	37.3387	5.5542
	Sequence	# PSMs	# Proteins	# Protein Groups	Protein Group Accessions	Modifications	MH+ [Da]	q-Value	PEP	A2	XCorr A2	Probability A2	B2	XCorr B2	Probability B2	C2	XCorr C2	Probability C2	D2	XCorr D2	Probability D2	# Missed Cleavages
	SYELPDGQVITIGNER	48	40	7	Q562R1;Q9BYX7;P68133;B4DUI8;B4DW52;V9HVZ7;Q53G99	N14(Deamidated)	1791.88	0	2.023e-06	High	3.89053	0	High	4.89359	0	High	3.93667	0	High	4.74047	0	0
	SYELPDGQVITIGNER	201	40	7	Q562R1;Q9BYX7;P68133;B4DUI8;B4DW52;V9HVZ7;Q53G99		1790.89	0	0.0006453	High	3.69497	0	High	4.36043	0	High	3.65867	0	High	4.58082	0	0
	MQKEITALAPSTMK	42	33	3	P68133;B4DUI8;B4DW52	Q2(Deamidated); M13(Oxidation)	1565.79	0	0.0004245	High	3.69018	0	High	4.43341	0	High	3.44291	0	High	4.06087	0	1
	DLYANNVLSGGTTMYPGIADR	2	8	1	B4DUI8	N5(Deamidated); M14(Oxidation)	2245.03	0	0.00198	High	3.52318	0										0
	MQKEITALAPSTMK	52	33	3	P68133;B4DUI8;B4DW52		1548.81	0	1.623e-06	High	3.50712	0	High	4.5718	0	High	3.60939	0	High	4.67859	0	1
	KDLYANNVLSGGTTMYPGIADR	2	8	1	B4DUI8	M15(Oxidation)	2372.17	0	0.00152	High	3.392	0				High	3.17104	0				1
	MQKEITALAPSTMK	8	33	3	P68133;B4DUI8;B4DW52	Q2(Deamidated)	1549.8	0	6.151e-07	High	3.34993	0	High	4.70444	0	High	3.63512	0	High	4.80906	0	1
	DLYANNVLSGGTTMYPGIADR	1	8	1	B4DUI8	N5(Deamidated); N6(Deamidated); M14(Oxidation)	2246.03	0	1.218e-07	High	3.27537	0										0
	YPIEHGIITNWDDMEK	44	15	2	P68133;B4DUI8		1960.91	0	0.0003337	High	3.27023	0	High	4.64845	0	High	3.248	0	High	5.20898	0	0
	MQKEITALAPSTMK	78	33	3	P68133;B4DUI8;B4DW52	M13(Oxidation)	1564.81	0	1.66e-05	High	3.23866	0	High	4.61899	0	High	3.60954	0	High	4.48774	0	1
	YPIEHGIITNWDDMEK	8	15	2	P68133;B4DUI8	N10(Deamidated)	1961.9	0	0.0008312	High	3.07593	0	High	4.15319	0	High	2.68986	0	High	4.09517	0	0
	SYELPDGQVITIGNER	10	40	7	Q562R1;Q9BYX7;P68133;B4DUI8;B4DW52;V9HVZ7;Q53G99	Q8(Deamidated); N14(Deamidated)	1792.86	0	0.0001875	High	3.05595	0	High	4.94249	0	High	3.55466	0	High	4.757	0	0
	YPIEHGIITNWDDMEK	45	15	2	P68133;B4DUI8	M14(Oxidation)	1976.9	0	0.004737	High	3.02413	0	High	4.50863	0	High	3.62038	0	High	4.35311	0	0
	MQKEITALAPSTMK	5	33	3	P68133;B4DUI8;B4DW52	M1(Oxidation); Q2(Deamidated); M13(Oxidation)	1581.78	0	3.647e-05	High	2.97663	0	High	3.15146	0	High	3.26873	0	High	4.50935	0	1
	MQKEITALAPSTMK	65	33	3	P68133;B4DUI8;B4DW52	M1(Oxidation); M13(Oxidation)	1580.8	0	1.83e-05	High	2.84942	0	High	4.10771	0	High	3.41788	0	High	3.9648	0	1
	EITALAPSTMK	80	34	4	P68133;B4DUI8;B4DW52;Q53G99		1161.62	0	0.004824	High	2.77506	0	High	2.81269	0	High	2.90885	0	High	3.27379	0	0
	EITALAPSTMK	87	34	4	P68133;B4DUI8;B4DW52;Q53G99	M10(Oxidation)	1177.61	0	0.004045	High	2.6693	0	High	2.66314	0	High	2.71699	0	High	2.69447	0	0
	VAPEEHPTLLTEAPLNPK	8	16	2	P68133;B4DUI8		1956.05	0	6.391e-05	High	2.66726	0	High	4.882	0	High	2.56031	0	High	4.14949	0	0
	DSYVGDEAQSK	13	37	4	P68133;B4DUI8;Q53G99;E7EVS6		1198.52	0	0.02167	High	2.58193	0	High	2.77143	0	High	2.40651	0	High	2.84557	0	0
	LDLAGRDLTDYLMK	37	31	6	Q562R1;P68133;B4DUI8;B4DW52;V9HVZ7;Q53G99	M13(Oxidation)	1639.84	0	0.01495	High	2.56464	0	High	3.10169	0	High	2.95064	0	High	3.51532	0	1
[truncated: 16,431 more rows]
