# Supplementary material for: LINE-1 protein localization and functional dynamics during the cell cycle
Source: eLife. 2018 Jan 8;7:e30058. doi: 10.7554/eLife.30058 (PMC5821460; doi:10.7554/eLife.30058)
Supplement: Supplementary file 1: — The DNA sequences of the RNA-FISH probes used to detect L1rp and ORFeus mRNA are reported. [file elife-30058-supp1.xlsx]

## Sheet: L1rp
	L1rp PROBES
#	PROBE (5'­> 3')
1	tttgtttacctaagcaagcc
2	ctgtctttttgtttgtctgt
3	cacttaagtctgcagaggtt
4	ctctcttcaaagctgtcaga
5	atgggttttcggtgtagatg
6	tctttgcctttggtttgaat
7	aagcacttctctgtattggt
8	cattcttcacgtagttctcg
9	atatttcttggaggctttgc
10	gggaagttctcctggataat
11	ttgatgcagtttcttcctag
12	acagtggggtgttaaagtct
13	ttgactttctgtctcgttga
14	agagctgagttcaattcctg
15	agatgtctattaggtctgct
16	tagtttgattgcactgtggt
17	tatgtggtgtctttgttctc
18	aattttggatctttcctgct
19	aatgtgtttgctcttgcttt
20	tttgtgtctctatttccttc
21	tgctagcggtctatcaattt
22	tttgcgtagaggtgtttgta
23	cttttttggttgtgtctctg
24	gtcaaaggctttttctgcat
25	gtgggtttgtcatagatagc
26	aagggaatgcttccagtttt
27	aataccctttatttccttct
28	agggacaatttgacttcctc
29	ttcacatcccttgtaagttg
30	tttatttccttgagcagtgg
31	tgttcttccatttgtttgtc
32	ctttgttcttttggcttagg
33	gaagtcaggtagtgtgatgc
34	aaggaagggatccagtttca
35	ctgaatggtaatgcctaggt
36	ttttgtcttttgttgccatt
37	atggtagtttcttttgctgt
38	cactttttgatggggttgtt
39	atgtgttttttggctgcata
40	ccattctaactggtgtgaga
41	cccaccaacagtgtaaaagt
42	cacactgacttccacaatgg
43	ggtatatacccagtaatggg
44	cgtgtgcatgtgtctttata
45	ccaagtctttgctattgtga
46	tcattgttggacatttgggt
47	tatgcggtgtttggtttttt
48	catcgtcatccttgtaatcg

## Sheet: ORFeus
	ORFeus PROBES
#	PROBE (5'­> 3')
1	aggttcttctcgaagttctc
2	aagttctcctggatgatgtc
3	gtgaagcgcacgatgatgtg
4	ctccttcaggatgttgaaga
5	atgaagtacttgatctcgcc
6	tctcgatggtctttacatct
7	tgctcattagttgatgcagt
8	tgatgttcagggtcaggatg
9	tgatcttggtgggcttgaag
10	gtagatgttcaggatggtca
11	cgctgaagaaggtgtactcg
12	caggtagttggtgatgatct
13	ttgttctcgttggtttcgaa
14	tgttgatgcgctcgaagaac
15	ttcttgatggtgtcgatctg
16	tacaggtgcttgtagtactc
17	cttctcgatgctttggaaca
18	cgatgttcatcaggctgatg
19	gatcttgttcaggatcttgg
20	tggatcagcttcttgatgtg
21	tgctgatgatcatgtggttc
22	tcagggtcttcagcatgaag
23	atgatcttgaagtaggtgcc
24	cacgatgttgaacagcaggg
25	aggtacacgatcatgtcgtc
26	aagttgctgatcagcttcag
27	tctgcacgttgatcttgtag
28	gttgttggtgtacaggaagg
29	tgtagttctccttgaacagg
30	ccatcttcacgatgttgatg
31	tgaagcggtagatcaccttg
32	ctcggtgaagaaggtcatgg
33	tctggttccagatgaacttc
34	tagtacagcttgaagtcggg
35	caggtagttgtagatgtggg
36	cagcaccacttgttgaacag
37	aagctcttcagcttgatcag
38	tgtaggtggcgaagatcttc
39	tcttcttgtagatctgcttc
40	acttcttgatggggttgttg
41	tgcacttcttcatatgcttc
42	tgtactcgttggggtagatg
43	ccacatcttcttgatccaat
44	agtactccatggtgtagatg
45	gaagctgatgaactcgtcgt
46	tccatgtgatctcattgttc
47	gtatatctcccaatgctatc
48	ccactaatgtgtcatctagc
